# Supplementary material
Source: publisher figshare collection journal article supplement (https://gsajournals.figshare.com/articles/dataset/_/7345160)
Supplement: Supplementary file 1 [file 1]

## Sheet: S07 - BVZ0032 - Winter - data
Accession	PlantID	ExperimentID	User	Condition	Location	Tray	AccessionID	Huan_EV	GR1	GR2	Phyll_TT	Phyll_PTU	L3Width	L3Length	EarEmerg_days	EarEmerg_TT	EarEmerg_PTU	Emerg_days	Tiller_EV
ABR2	12095	BVZ0032	Pip	Wagga_Winter	Conviron 3	6B1	615	3.9	0.01565	0.01558	96.15	781.19	2.2	3.6	128	701	5697	9	2
ABR3	12219	BVZ0032	Pip	Wagga_Winter	Conviron 3	13A4	616	4.3	0.01657	0.01947	89.64	734.72	2.6	4.3	157	1066	8219	11	2
ABR4	12049	BVZ0032	Pip	Wagga_Winter	Conviron 3	3C4	617	4.1	0.01381	0.01947	99.84	811.23	2.4	3.6	187	1515	10417	9	2
ABR5	12072	BVZ0032	Pip	Wagga_Winter	Conviron 3	4D4	618	4.3	0.01473	0.01947	92.71	753.29	2.4	3.2	137	805	6442	9	2
ABR7	12107	BVZ0032	Pip	Wagga_Winter	Conviron 3	6D3	619	4.5	0.01565	0.02077	89.51	727.31	2.8	3.8	148	915	7353	9	2
Abz1021	12181	BVZ0032	Pip	Wagga_Winter	Conviron 3	11A2	621	3.2	0.00737	0.01817	144.22	1171.78	3	3.8	159	1074	8271	9	1
Adi-1	12084	BVZ0032	Pip	Wagga_Winter	Conviron 3	5C3	622	4.5	0.01289	0.02077	89.51	727.31	2.6	4.6	118	592	4908	9	2
Adi-10	12200	BVZ0032	Pip	Wagga_Winter	Conviron 3	12A3	623	4.4	0.01289	0.01947	89.51	727.31	3	3.6	123	642	5297	9	2
Adi-11	12228	BVZ0032	Pip	Wagga_Winter	Conviron 3	13C3	624	4.5	0.01289	0.02077	89.51	727.31	2.6	4.2	120	612	5063	9	2
Adi-13	12207	BVZ0032	Pip	Wagga_Winter	Conviron 3	12B5	625	4.1	0.01289	0.02077	100.4	822.88	2.8	5	121	634	5245	11	1
Adi-14	12009	BVZ0032	Pip	Wagga_Winter	Conviron 3	1B5	626	4.7	0.01473	0.01817	78.66	639.15	2.2	4.1	124	653	5376	9	2
Adi-15	12250	BVZ0032	Pip	Wagga_Winter	Conviron 3	14D2	627	4.4	0.01197	0.01947	89.51	727.31	2.8	4.7	125	663	5456	9	1
Adi-16	12260	BVZ0032	Pip	Wagga_Winter	Conviron 3	15B4	628	4.3	0.01105	0.01947	92.71	753.29	2.8	3.8	126	674	5536	9	2
Adi-17	12150	BVZ0032	Pip	Wagga_Winter	Conviron 3	9B2	629	4.2	0.01381	0.01817	89.64	734.72	2.6	4.2	116	583	4856	11	1
Adi-18	12119	BVZ0032	Pip	Wagga_Winter	Conviron 3	7C2	630	4.3	0.01473	0.01817	89.51	727.31	2.2	4.9	130	723	5860	9	2
Adi-2	12022	BVZ0032	Pip	Wagga_Winter	Conviron 3	2A5	631	4.5	0.01289	0.02077	89.51	727.31	2.8	4.6	120	612	5063	9	1
Adi-3	12253	BVZ0032	Pip	Wagga_Winter	Conviron 3	15A2	632	4.3	0.01473	0.01817	86.55	709.38	2.8	4.4	121	634	5245	11	2
Adi-6	12237	BVZ0032	Pip	Wagga_Winter	Conviron 3	14A4	633	4.6	0.01381	0.02207	89.51	727.31	2.8	4.6	123	642	5297	9	1
Adi-7	12071	BVZ0032	Pip	Wagga_Winter	Conviron 3	4D3	634	4.4	0.01197	0.01947	89.51	727.31	2.8	5.2	118	592	4908	9	2
Adi-8	12082	BVZ0032	Pip	Wagga_Winter	Conviron 3	5C1	635	4.4	0.01105	0.02207	92.97	761.93	2.2	3.5	121	634	5245	11	1
Adi-9	12015	BVZ0032	Pip	Wagga_Winter	Conviron 3	1D1	636	4.7	0.01289	0.02077	83.74	680.39	2.8	4.4	113	544	4510	9	2
Arn1	12133	BVZ0032	Pip	Wagga_Winter	Conviron 3	8B3	637	3.8	0.01473	0.01558	99.84	811.23	2.6	3.7	124	653	5376	9	2
Arn1018	12188	BVZ0032	Pip	Wagga_Winter	Conviron 3	11B4	638	4.2	0.01381	0.01817	89.64	734.72	2.2	3.2	171	1283	9244	11	2
Bar1020	12259	BVZ0032	Pip	Wagga_Winter	Conviron 3	15B3	639	3.6	0.01105	0.01817	112.18	923.35	3	5.2	136	816	6526	12	1
BD18-1						Average		4.5	0.01455	0.01869	84.26	686.98	2	3	135	785	6304	10	2
BD2-3	12087	BVZ0032	Pip	Wagga_Winter	Conviron 3	5D1	641	4.7	0.01289	0.02077	83.74	680.39	2.8	4.9	120	612	5063	9	2
BD21						Average		4.3	0.01274	0.02055	95.14	776.35	3	4	109	510	3977	10	2
BD21-3	12193	BVZ0032	Pip	Wagga_Winter	Conviron 3	11C4	643	4.8	0.01197	0.02077	81.12	659.13	3	5	108	500	3827	9	1
BD3-1	12127	BVZ0032	Pip	Wagga_Winter	Conviron 3	8A2	645	4.6	0.01289	0.02207	89.51	727.31	3	5.1	106	482	3708	9	2
BD3-2	12027	BVZ0032	Pip	Wagga_Winter	Conviron 3	2B5	812	4.5	0.01381	0.02077	89.51	727.31	3.2	5.3	100	434	3395	9	2
BD30-1	12138	BVZ0032	Pip	Wagga_Winter	Conviron 3	8C3	646	4.1	0.01381	0.01947	99.84	811.23	2	2.5	142	860	6853	9	2
Bdis03-1	12226	BVZ0032	Pip	Wagga_Winter	Conviron 3	13C1	1199	3.9	0.01381	0.01428	89.64	734.72	2.6	3.5	119	613	5088	11	2
Bdis03-5	12179	BVZ0032	Pip	Wagga_Winter	Conviron 3	10D3	1200	4.3	0.01565	0.01817	86.55	709.38	2.8	4	119	613	5088	11	2
Bdis03-6	12039	BVZ0032	Pip	Wagga_Winter	Conviron 3	3A4	1201	3.9	0.01381	0.01687	99.84	811.23	2.8	3.8	135	781	6274	9	2
Bdis03-9	12167	BVZ0032	Pip	Wagga_Winter	Conviron 3	10B1	1202	3.7	0.01013	0.01687	104.59	857.17	2.6	3.3	126	692	5645	11	1
Bdis03-10	12101	BVZ0032	Pip	Wagga_Winter	Conviron 3	6C2	1203	3.9	0.01289	0.01687	96.54	791.23	2.4	3.6	118	603	5011	11	2
Bdis03-11	12012	BVZ0032	Pip	Wagga_Winter	Conviron 3	1C3	1204	3.8	0.01197	0.01687	103.84	843.68	2.8	4	121	622	5140	9	2
Bdis03-12	12145	BVZ0032	Pip	Wagga_Winter	Conviron 3	9A2	1205	3.8	0.01381	0.01558	94.92	781.29	2.6	3.8	121	640	5298	12	2
Bdis03-13	12287	BVZ0032	Pip	Wagga_Winter	Conviron 3	16D3	1206	3.7	0.01105	0.01687	108.16	878.83	3	4	123	642	5297	9	2
Bdis03-14	12169	BVZ0032	Pip	Wagga_Winter	Conviron 3	10B3	1207	3.9	0.01381	0.01817	100.4	822.88	2.6	3.7	121	634	5245	11	1
Bdis03-15	12007	BVZ0032	Pip	Wagga_Winter	Conviron 3	1B3	1208	4.1	0.01289	0.01817	96.15	781.19	2.4	4.3	114	554	4645	9	2
Bdis03-16	12097	BVZ0032	Pip	Wagga_Winter	Conviron 3	6B3	1209	4.1	0.01749	0.01558	89.51	727.31	2.8	3.6	120	612	5063	9	2
Bdis03-17	12270	BVZ0032	Pip	Wagga_Winter	Conviron 3	15D4	1210	4.2	0.01197	0.01817	89.64	734.72	2.8	3.6	121	634	5245	11	2
Bdis03-18	12180	BVZ0032	Pip	Wagga_Winter	Conviron 3	10D4	1211	3.8	0.01381	0.01428	92.97	761.93	2.4	3.8	119	613	5088	11	2
Bdis03-19	12088	BVZ0032	Pip	Wagga_Winter	Conviron 3	5D2	1212	4.5	0.01381	0.02077	89.51	727.31	2.6	3.7	117	582	4832	9	2
Bdis05-1	12121	BVZ0032	Pip	Wagga_Winter	Conviron 3	7C4	1213	3.8	0.01289	0.01817	102.83	846.4	3	3.6	127	710	5782	12	1
Bdis05-7	12114	BVZ0032	Pip	Wagga_Winter	Conviron 3	7B2	1170	4.1	0.01381	0.01947	94.92	781.29	2.6	3.7	139	848	6775	12	2
Bdis05-9	12045	BVZ0032	Pip	Wagga_Winter	Conviron 3	3B5	1171	3.9	0.01565	0.01558	92.97	761.93	3	4.1	121	634	5245	11	2
Bdis05-11	12122	BVZ0032	Pip	Wagga_Winter	Conviron 3	7C5	1173	4.3	0.01657	0.01947	89.64	734.72	2.8	3.5	126	692	5645	11	2
Bdis05-12	12224	BVZ0032	Pip	Wagga_Winter	Conviron 3	13B4	1174	4.2	0.01657	0.01817	89.64	734.72	2.2	2.7	128	714	5808	11	2
Bdis05-13	12036	BVZ0032	Pip	Wagga_Winter	Conviron 3	2D4	1175	4.2	0.01565	0.01817	92.71	753.29	2.2	3	132	746	6024	9	2
Bdis05-14	12117	BVZ0032	Pip	Wagga_Winter	Conviron 3	7B5	1176	4.3	0.01381	0.02207	99.84	811.23	5	9	123	642	5297	9	2
Bdis05-15	12098	BVZ0032	Pip	Wagga_Winter	Conviron 3	6B4	1177	4.1	0.01565	0.01687	89.64	734.72	2.6	3.7	121	634	5245	11	2
Bdis05-16	12008	BVZ0032	Pip	Wagga_Winter	Conviron 3	1B4	1178	3.6	0.01197	0.01687	109.13	894.44	2.6	7	124	665	5484	11	1
Bdis05-17	12176	BVZ0032	Pip	Wagga_Winter	Conviron 3	10C5	1179	4.1	0.01289	0.02077	98.72	812.55	3	3.8	120	630	5219	12	2
Bdis05-18	12277	BVZ0032	Pip	Wagga_Winter	Conviron 3	16B3	1180	3.5	0.01013	0.01817	113.6	942.83	3	4.2	119	632	5247	14	1
Bdis05-19	12028	BVZ0032	Pip	Wagga_Winter	Conviron 3	2C1	1181	3.9	0.01381	0.01817	98.72	812.55	2.8	3.3	121	640	5298	12	1
Bdis22-1	12204	BVZ0032	Pip	Wagga_Winter	Conviron 3	12B2	1182	4.2	0.01473	0.01817	88.14	725.49	2	3	177	1383	9788	12	2
Bdis22-4	12279	BVZ0032	Pip	Wagga_Winter	Conviron 3	16B5	1183	4.2	0.01381	0.01817	92.71	753.29	2.2	3.3	142	860	6853	9	2
Bdis22-5	12064	BVZ0032	Pip	Wagga_Winter	Conviron 3	4C1	1184	4.4	0.01565	0.01947	89.51	727.31	2.4	3.3	139	829	6604	9	2
Bdis22-6	12051	BVZ0032	Pip	Wagga_Winter	Conviron 3	3D1	1185	4.3	0.01381	0.01947	92.71	753.29	2.2	3.3	163	1134	8576	9	2
Bdis22-10	12157	BVZ0032	Pip	Wagga_Winter	Conviron 3	9C4	1186	4.3	0.01289	0.02077	92.97	761.93	2.4	4	132	760	6139	11	2
Bdis22-11	12059	BVZ0032	Pip	Wagga_Winter	Conviron 3	4B1	1187	4.7	0.01749	0.01817	78.66	639.15	2.2	3.5	137	805	6442	9	2
Bdis22-12	12099	BVZ0032	Pip	Wagga_Winter	Conviron 3	6B5	1188	4.5	0.01473	0.02077	89.51	727.31	2.6	3.5	128	701	5697	9	2
Bdis22-13	12126	BVZ0032	Pip	Wagga_Winter	Conviron 3	7D4	1189	4.6	0.01197	0.02336	92.71	753.29	2.8	3.5	142	860	6853	9	2
Bdis22-14	12225	BVZ0032	Pip	Wagga_Winter	Conviron 3	13B5	1190	4.2	0.01381	0.02207	100.4	822.88	2.8	3.1	140	852	6801	11	2
Bdis22-15	12090	BVZ0032	Pip	Wagga_Winter	Conviron 3	5D4	1191	4.6	0.01657	0.01817	81.12	659.13	2.8	3.5	135	781	6274	9	2
Bdis22-16	12221	BVZ0032	Pip	Wagga_Winter	Conviron 3	13B1	1192	4.2	0.01473	0.01817	89.64	734.72	2.2	3.2	157	1066	8219	11	2
Bdis22-17	12153	BVZ0032	Pip	Wagga_Winter	Conviron 3	9B5	1193	4.1	0.01565	0.01687	89.64	734.72	1.8	3.6	154	1018	7978	11	2
Bdis22-18	12286	BVZ0032	Pip	Wagga_Winter	Conviron 3	16D2	1194	4.2	0.01289	0.01947	92.97	761.93	2.8	4.1	126	692	5645	11	2
Bdis22-19	12069	BVZ0032	Pip	Wagga_Winter	Conviron 3	4D1	1195	4.7	0.01841	0.01817	76.06	623.4	2.4	3.9	133	772	6222	11	2
Bdis23-1						average		4.1	0.01307	0.01843	96.06	785.17	2.5	4.3	158	1078	8263	10	2
Bdis23-2	12274	BVZ0032	Pip	Wagga_Winter	Conviron 3	16A5	1197	3.4	0.00737	0.02077	132.54	1099.97	2.4	3	147	949	7566	14	1
Bdis23-3	12013	BVZ0032	Pip	Wagga_Winter	Conviron 3	1C4	1198	3.8	0.01197	0.01947	112.87	917.04	2.6	3.9	144	872	7020	9	2
Bdis23-5						average		4.2	0.0151	0.01869	92.76	754.97	2.12	3	151	960	7633	9	2
Bdis25-1	12129	BVZ0032	Pip	Wagga_Winter	Conviron 3	8A4	1201	4.5	0.01657	0.02207	92.71	753.29	2	3.3	159	1074	8271	9	2
Bdis25-4	12186	BVZ0032	Pip	Wagga_Winter	Conviron 3	11B2	1202	4.4	0.01381	0.02077	92.71	753.29	2.4	3.8	159	1074	8271	9	2
Bdis25-5	12032	BVZ0032	Pip	Wagga_Winter	Conviron 3	2C5	1203	4.4	0.01473	0.01947	89.51	727.31	2	4.2	126	674	5536	9	2
Bdis25-8	12216	BVZ0032	Pip	Wagga_Winter	Conviron 3	12D4	1204	4.2	0.01289	0.01947	96.15	781.19	2.6	4	134	769	6191	9	2
Bdis25-10	12201	BVZ0032	Pip	Wagga_Winter	Conviron 3	12A4	1205	3.8	0.01289	0.01558	99.84	811.23	2.6	4.8	139	829	6604	9	2
Bdis25-11	12074	BVZ0032	Pip	Wagga_Winter	Conviron 3	5A3	1206	3.9	0.01381	0.01558	96.15	781.19	2.4	4.3	137	805	6442	9	2
Bdis25-12	12037	BVZ0032	Pip	Wagga_Winter	Conviron 3	3A2	1207	4.4	0.01565	0.01947	86.55	709.38	2.2	3.5	154	1018	7978	11	2
Bdis28-1	12185	BVZ0032	Pip	Wagga_Winter	Conviron 3	11B1	1208	4.3	0.01473	0.01947	89.64	734.72	2.6	3.8	140	852	6801	11	2
Bdis28-2	12018	BVZ0032	Pip	Wagga_Winter	Conviron 3	1D4	1209	4.4	0.01473	0.01947	89.51	727.31	2.8	3.9	135	781	6274	9	2
Bdis28-7	12160	BVZ0032	Pip	Wagga_Winter	Conviron 3	9D2	1210	3.9	0.01289	0.01817	100.4	822.88	2.6	4.8	146	907	7301	11	2
Bdis28-8	12070	BVZ0032	Pip	Wagga_Winter	Conviron 3	4D2	1211	4.5	0.01565	0.02077	86.55	709.38	3	4.8	132	760	6139	11	2
Bdis28-10	12055	BVZ0032	Pip	Wagga_Winter	Conviron 3	4A2	1212	4.3	0.01565	0.01817	89.51	727.31	2.8	4.2	137	805	6442	9	2
Bdis31-1	12056	BVZ0032	Pip	Wagga_Winter	Conviron 3	4A3	1213	3.8	0.01381	0.01687	103.84	843.68	2.8	5.4	142	860	6853	9	2
Bdis31-2	12076	BVZ0032	Pip	Wagga_Winter	Conviron 3	5A5	1214	3.9	0.01289	0.01817	103.84	843.68	3	4.5	144	872	7020	9	2
Bdis31-11	12238	BVZ0032	Pip	Wagga_Winter	Conviron 3	14A5	1215	3.7	0.01197	0.01687	108.16	878.83	3	4.6	159	1074	8271	9	2
Bdis31-12	12194	BVZ0032	Pip	Wagga_Winter	Conviron 3	11C5	1216	3.7	0.01197	0.01817	112.87	917.04	3.2	4.2	152	970	7695	9	1
Bdis31-13	12083	BVZ0032	Pip	Wagga_Winter	Conviron 3	5C2	1217	3.7	0.01197	0.01817	109.13	894.44	3	4.1	146	907	7301	11	1
Bdis31-14	12078	BVZ0032	Pip	Wagga_Winter	Conviron 3	5B2	1218	3.8	0.01289	0.01558	96.54	791.23	2.8	5.7	154	1018	7978	11	2
Bdis31-15	12029	BVZ0032	Pip	Wagga_Winter	Conviron 3	2C2	1219	3.7	0.01197	0.01817	109.13	894.44	3	4.6	150	961	7643	11	1
Bdis31-16	12063	BVZ0032	Pip	Wagga_Winter	Conviron 3	4B5	1220	3.6	0.01197	0.01687	107.3	883.2	3	4.3	149	957	7617	12	1
Bdis31-17	12206	BVZ0032	Pip	Wagga_Winter	Conviron 3	12B4	1221	3.3	0.00737	0.01947	137.11	1128.54	3	4.3	139	848	6775	12	1
Bdis31-18	12149	BVZ0032	Pip	Wagga_Winter	Conviron 3	9B1	1222	3.7	0.01381	0.01428	96.54	791.23	2.8	5.3	154	1018	7978	11	2
Bdis31-19	12168	BVZ0032	Pip	Wagga_Winter	Conviron 3	10B2	1223	3.4	0.00645	0.02207	145.18	1194.92	3	4.2	153	1014	7953	12	1
Bdis32-2	12118	BVZ0032	Pip	Wagga_Winter	Conviron 3	7C1	1224	3.8	0.01289	0.01687	98.72	812.55	3	4	134	792	6364	12	2
BdTR10a	12123	BVZ0032	Pip	Wagga_Winter	Conviron 3	7D1	728	4.7	0.01289	0.01947	81.12	659.13	2.8	4.7	121	622	5140	9	2
BdTR10b	12199	BVZ0032	Pip	Wagga_Winter	Conviron 3	12A2	729	4.4	0.01105	0.01947	89.51	727.31	3	4.1	123	642	5297	9	2
BdTR10c	12001	BVZ0032	Pip	Wagga_Winter	Conviron 3	1A2	730	4.6	0.01289	0.01817	81.12	659.13	2.2	4	120	612	5063	9
BdTR10d	12266	BVZ0032	Pip	Wagga_Winter	Conviron 3	15C5	731	4.3	0.01105	0.01817	89.51	727.31	2.8	4.2	121	622	5140	9	2
BdTR10e	12125	BVZ0032	Pip	Wagga_Winter	Conviron 3	7D3	732	4.7	0.01381	0.01947	81.12	659.13	2.6	4.2	124	653	5376	9	2
BdTR10f	12052	BVZ0032	Pip	Wagga_Winter	Conviron 3	3D2	733	4.4	0.01105	0.01947	89.51	727.31	2.6	4.1	121	622	5140	9	2
BdTR10g	12241	BVZ0032	Pip	Wagga_Winter	Conviron 3	14B3	734	4.3	0.01381	0.01817	89.51	727.31	2.8	4.2	121	622	5140	9	2
BdTR10h	12131	BVZ0032	Pip	Wagga_Winter	Conviron 3	8B1	735	3.9	0.01473	0.01687	94.92	781.29	2.8	4.1	120	630	5219	12	2
BdTR10i	12284	BVZ0032	Pip	Wagga_Winter	Conviron 3	16C5	736	4.3	0.00921	0.01947	89.64	734.72	2.6	4.6	119	613	5088	11	2
BdTR10j	12031	BVZ0032	Pip	Wagga_Winter	Conviron 3	2C4	737	4.7	0.01289	0.01947	81.12	659.13	2.8	4.5	118	592	4908	9	2
BdTR10k	12135	BVZ0032	Pip	Wagga_Winter	Conviron 3	8B5	738	4.5	0.01473	0.02077	89.51	727.31	2.6	4.2	123	642	5297	9	2
BdTR10m	12159	BVZ0032	Pip	Wagga_Winter	Conviron 3	9D1	739	4.5	0.00921	0.02077	89.51	727.31	2.6	4.6	124	653	5376	9	2
BdTR10n	12034	BVZ0032	Pip	Wagga_Winter	Conviron 3	2D2	740	4.3	0.01473	0.01947	92.71	753.29	2.8	4.5	114	554	4645	9	2
BdTR10o	12003	BVZ0032	Pip	Wagga_Winter	Conviron 3	1A4	741	4.5	0.01013	0.02077	89.51	727.31	2.6	4	120	612	5063	9	2
BdTR11a	12251	BVZ0032	Pip	Wagga_Winter	Conviron 3	14D3	742	4.1	0.01473	0.01817	96.15	781.19	3	4.6	118	592	4908	9	1
BdTR11b	12010	BVZ0032	Pip	Wagga_Winter	Conviron 3	1C1	743	4.5	0.01197	0.02077	89.51	727.31	3	5.3	108	500	3827	9	2
BdTR11c	12068	BVZ0032	Pip	Wagga_Winter	Conviron 3	4C5	744	4.3	0.01289	0.01947	92.71	753.29	3	5.1	114	554	4645	9	2
BdTR11d	12208	BVZ0032	Pip	Wagga_Winter	Conviron 3	12C1	745	4.3	0.01105	0.01947	92.71	753.29	3	5.3	115	563	4681	9	1
BdTR11e	12268	BVZ0032	Pip	Wagga_Winter	Conviron 3	15D2	746	4.2	0.01289	0.01947	96.15	781.19	3	4.2	123	642	5297	9	2
BdTR11f	12210	BVZ0032	Pip	Wagga_Winter	Conviron 3	12C3	747	4.1	0.01105	0.01947	99.84	811.23	2.8	4.8	123	642	5297	9	1
BdTR11g	12062	BVZ0032	Pip	Wagga_Winter	Conviron 3	4B4	748	4.4	0.01473	0.02077	89.64	734.72	2.8	5	108	509	3893	11	2
BdTR11h	12016	BVZ0032	Pip	Wagga_Winter	Conviron 3	1D2	749	4.2	0.01381	0.01687	89.51	727.31	3	5	117	582	4832	9	1
BdTR11i	12273	BVZ0032	Pip	Wagga_Winter	Conviron 3	16A4	750	4.3	0.01289	0.01947	92.71	753.29	3	5.4	117	582	4832	9	1
BdTR12a	12217	BVZ0032	Pip	Wagga_Winter	Conviron 3	13A2	751	4.3	0.01565	0.01817	89.51	727.31	2.8	4.5	123	642	5297	9	2
BdTR12b	12017	BVZ0032	Pip	Wagga_Winter	Conviron 3	1D3	752	4.2	0.01565	0.01817	92.71	753.29	3	4.4	120	612	5063	9	1
BdTR12c	12198	BVZ0032	Pip	Wagga_Winter	Conviron 3	11D4	158	5.8	0.01841	0.02466	66.56	540.82	2.2	2.8	106	482	3708	9	2
BdTR13a	12102	BVZ0032	Pip	Wagga_Winter	Conviron 3	6C3	754	4.8	0.01381	0.02207	80.97	663.62	2.2	4.2	102	457	3548	11	1
BdTR13b	12073	BVZ0032	Pip	Wagga_Winter	Conviron 3	5A2	755	4.2	0.01565	0.00909	74.17	602.63	3.8	5.6	106	482	3708	9	2
BdTR13c	12196	BVZ0032	Pip	Wagga_Winter	Conviron 3	11D2	756	4.8	0.01289	0.02077	81.12	659.13	2.6	4.1	104	466	3600	9	1
BdTR13d	12177	BVZ0032	Pip	Wagga_Winter	Conviron 3	10D1	757	4.7	0.01289	0.01947	81.12	659.13	2.2	3.9	123	642	5297	9	1
BdTR13e	12254	BVZ0032	Pip	Wagga_Winter	Conviron 3	15A3	758	4.9	0.01473	0.01947	76.35	620.35	2.4	3.5	114	554	4645	9	1
BdTR13f	12075	BVZ0032	Pip	Wagga_Winter	Conviron 3	5A4	759	5.2	0.01473	0.02336	76.35	620.35	2.4	3.6	103	458	3546	9	2
BdTR13g	12151	BVZ0032	Pip	Wagga_Winter	Conviron 3	9B3	760	4.8	0.01105	0.02466	89.51	727.31	2.2	4	102	450	3494	9	1
BdTR13h	12060	BVZ0032	Pip	Wagga_Winter	Conviron 3	4B2	761	4.9	0.01473	0.02077	78.66	639.15	2.2	4	104	466	3600	9	2
BdTR13i	12120	BVZ0032	Pip	Wagga_Winter	Conviron 3	7C3	762	4.8	0.01381	0.02207	80.97	663.62	2.4	3.8	102	457	3548	11	1
BdTR13j	12282	BVZ0032	Pip	Wagga_Winter	Conviron 3	16C3	763	4.5	0.01197	0.02077	89.51	727.31	2.4	3.7	108	500	3827	9	0
BdTR13k	12026	BVZ0032	Pip	Wagga_Winter	Conviron 3	2B4	764	4.8	0.01289	0.02207	83.74	680.39	2.2	3.7	104	466	3600	9	1
BdTR13m	12044	BVZ0032	Pip	Wagga_Winter	Conviron 3	3B4	765	4.9	0.01381	0.02077	78.66	639.15	2.2	3.5	107	491	3767	9	1
BdTR13n	12067	BVZ0032	Pip	Wagga_Winter	Conviron 3	4C4	766	4.9	0.01381	0.02077	78.66	639.15	2.6	4	103	458	3546	9	2
BdTR13o	12276	BVZ0032	Pip	Wagga_Winter	Conviron 3	16B2	767	4.7	0.01013	0.02596	92.97	761.93	2.8	3.7	104	474	3656	11	1
BdTR1a	12091	BVZ0032	Pip	Wagga_Winter	Conviron 3	6A2	647	4.5	0.01289	0.01817	83.74	680.39	2.8	4.9	111	526	4084	9	2
BdTR1b	12085	BVZ0032	Pip	Wagga_Winter	Conviron 3	5C4	648	4.5	0.01013	0.02207	92.71	753.29	2.8	4.2	113	544	4510	9	2
BdTR1c	12248	BVZ0032	Pip	Wagga_Winter	Conviron 3	14C5	649	3.8	0.01289	0.01817	108.16	878.83	3	3.8	124	653	5376	9	2
BdTR1d	12280	BVZ0032	Pip	Wagga_Winter	Conviron 3	16C1	650	4.5	0.01105	0.02207	92.71	753.29	2.8	3.9	121	622	5140	9	2
BdTR1f	12136	BVZ0032	Pip	Wagga_Winter	Conviron 3	8C1	652	4.3	0.01381	0.01817	89.51	727.31	2.6	4.2	120	612	5063	9	2
BdTR1g	12202	BVZ0032	Pip	Wagga_Winter	Conviron 3	12A5	653	4.3	0.01197	0.01947	92.71	753.29	3	4.2	117	582	4832	9	2
BdTR1h	12014	BVZ0032	Pip	Wagga_Winter	Conviron 3	1C5	654	4.5	0.01289	0.02077	89.51	727.31	3	4.3	110	517	3945	9	2
BdTR1i	12272	BVZ0032	Pip	Wagga_Winter	Conviron 3	16A3	655	4.1	0.01105	0.01817	96.15	781.19	3	4.8	123	642	5297	9	2
BdTR1j	12115	BVZ0032	Pip	Wagga_Winter	Conviron 3	7B3	656	4.5	0.01105	0.02077	89.51	727.31	2.8	4.3	117	582	4832	9	2
BdTR1k	12103	BVZ0032	Pip	Wagga_Winter	Conviron 3	6C4	657	4.5	0.01013	0.02207	92.71	753.29	3	4.4	110	517	3945	9	2
BdTR1m	12281	BVZ0032	Pip	Wagga_Winter	Conviron 3	16C2	658	3.8	0.01197	0.01817	99.4	824.98	3	3.7	121	653	5406	14	2
BdTR1n	12174	BVZ0032	Pip	Wagga_Winter	Conviron 3	10C3	659	4.2	0.01289	0.01817	92.71	753.29	2.8	4.5	118	592	4908	9	2
BdTR2a	12140	BVZ0032	Pip	Wagga_Winter	Conviron 3	8C5	660	3.8	0.01197	0.01947	103.72	860.85	3	3.8	118	621	5167	14	2
BdTR2b	12006	BVZ0032	Pip	Wagga_Winter	Conviron 3	1B2	661	4.5	0.01105	0.02077	89.51	727.31	2.6	4.3	111	526	4084	9	2
BdTR2c	12184	BVZ0032	Pip	Wagga_Winter	Conviron 3	11A5	662	4.4	0.01197	0.02077	92.71	753.29	2.8	3.6	120	612	5063	9	2
BdTR2d	12110	BVZ0032	Pip	Wagga_Winter	Conviron 3	7A3	663	4.5	0.01381	0.01817	83.74	680.39	2.8	4.4	120	612	5063	9	2
BdTR2e	12137	BVZ0032	Pip	Wagga_Winter	Conviron 3	8C2	664	4.4	0.01105	0.02077	92.71	753.29	3	4.4	111	526	4084	9	2
BdTR2f	12263	BVZ0032	Pip	Wagga_Winter	Conviron 3	15C2	665	4.2	0.01105	0.01947	96.15	781.19	3	4.3	123	642	5297	9	2
BdTR2g	12269	BVZ0032	Pip	Wagga_Winter	Conviron 3	15D3	666	3.9	0.01289	0.01687	99.84	811.23	2.8	4.2	123	642	5297	9	2
BdTR2h	12141	BVZ0032	Pip	Wagga_Winter	Conviron 3	8D1	667	4.5	0.01105	0.02077	89.51	727.31	2.8	4.6	118	592	4908	9	2
BdTR2i	12192	BVZ0032	Pip	Wagga_Winter	Conviron 3	11C3	668	4.2	0.01197	0.01947	96.15	781.19	3	4.1	120	612	5063	9	2
BdTR2j	12271	BVZ0032	Pip	Wagga_Winter	Conviron 3	16A2	669	4.3	0.01197	0.01947	92.71	753.29	3	4.1	115	563	4681	9	2
BdTR2k	12019	BVZ0032	Pip	Wagga_Winter	Conviron 3	2A2	670	4.3	0.01197	0.01817	89.51	727.31	3	4.6	113	544	4510	9	2
BdTR2m	12252	BVZ0032	Pip	Wagga_Winter	Conviron 3	14D4	671	4.2	0.01381	0.01817	92.71	753.29	3	4	118	592	4908	9	2
BdTR2n	12040	BVZ0032	Pip	Wagga_Winter	Conviron 3	3A5	672	4.4	0.01289	0.01947	89.51	727.31	2.8	4.4	114	554	4645	9	2
BdTR2p	12211	BVZ0032	Pip	Wagga_Winter	Conviron 3	12C4	674	4.2	0.01197	0.01817	92.71	753.29	2.8	4.1	123	642	5297	9	2
BdTR2r	12227	BVZ0032	Pip	Wagga_Winter	Conviron 3	13C2	675	3	0.01289		89.51	727.31	2.2	4	126	674	5536	9	2
BdTR2s	12215	BVZ0032	Pip	Wagga_Winter	Conviron 3	12D3	676	4.4	0.01105	0.01947	89.51	727.31	2.8	3.8	120	612	5063	9	2
BdTR3a	12093	BVZ0032	Pip	Wagga_Winter	Conviron 3	6A4	677	4.7	0.01289	0.01947	81.12	659.13	2.8	5	120	612	5063	9	2
BdTR3b	12079	BVZ0032	Pip	Wagga_Winter	Conviron 3	5B3	678	4.8	0.01381	0.01947	78.66	639.15	2.6	5	117	582	4832	9	3
BdTR3c	12155	BVZ0032	Pip	Wagga_Winter	Conviron 3	9C2	679	4.5	0.01289	0.01817	83.74	680.39	2.8	5.6	118	592	4908	9	2
BdTR3d	12173	BVZ0032	Pip	Wagga_Winter	Conviron 3	10C2	680	4.4	0.01197	0.01947	89.51	727.31	2.4	4.9	126	674	5536	9	2
BdTR3e	12267	BVZ0032	Pip	Wagga_Winter	Conviron 3	15D1	681	4.4	0.01197	0.01947	89.51	727.31	2.6	5	123	642	5297	9	2
BdTR3f	12255	BVZ0032	Pip	Wagga_Winter	Conviron 3	15A4	682	4.7	0.01473	0.01817	78.66	639.15	2.6	4.5	123	642	5297	9	2
BdTR3g	12230	BVZ0032	Pip	Wagga_Winter	Conviron 3	13C5	683	4.6	0.01105	0.02207	89.51	727.31	2.8	4.7	123	642	5297	9	2
BdTR3h	12002	BVZ0032	Pip	Wagga_Winter	Conviron 3	1A3	684	4.8	0.01381	0.01817	76.35	620.35	2.6	4.7	118	592	4908	9	3
BdTR3i	12163	BVZ0032	Pip	Wagga_Winter	Conviron 3	10A2	685	4.7	0.01381	0.01817	78.66	639.15	2.4	4.4	124	653	5376	9	2
BdTR3j	12113	BVZ0032	Pip	Wagga_Winter	Conviron 3	7B1	686	4.7	0.01289	0.02336	89.51	727.31	2.8	4.6	123	642	5297	9	2
BdTR3k	12187	BVZ0032	Pip	Wagga_Winter	Conviron 3	11B3	687	4.3	0.01289	0.01947	92.71	753.29	2.6	4.8	125	663	5456	9	2
BdTR3m	12124	BVZ0032	Pip	Wagga_Winter	Conviron 3	7D2	688	4.8	0.01381	0.02077	81.12	659.13	2.6	5	124	653	5376	9	2
BdTR3n	12258	BVZ0032	Pip	Wagga_Winter	Conviron 3	15B2	689	4.4	0.01289	0.01947	89.51	727.31	2.8	5.5	123	642	5297	9	2
BdTR3o	12048	BVZ0032	Pip	Wagga_Winter	Conviron 3	3C3	690	4.5	0.01289	0.02077	89.51	727.31	2.2	4.4	124	653	5376	9	2
BdTR3p	12162	BVZ0032	Pip	Wagga_Winter	Conviron 3	9D4	691	4.5	0.01473	0.01687	81.12	659.13	2.8	4.8	123	642	5297	9	2
BdTR3s	12023	BVZ0032	Pip	Wagga_Winter	Conviron 3	2B1	693	4.9	0.01565	0.01947	76.35	620.35	2.4	4.3	123	642	5297	9	3
BdTR3t	12130	BVZ0032	Pip	Wagga_Winter	Conviron 3	8A5	694	4.8	0.01381	0.01947	78.66	639.15	2.6	4.7	120	612	5063	9	3
BdTR5a	12053	BVZ0032	Pip	Wagga_Winter	Conviron 3	3D3	695	3.9	0.01473	0.01687	94.92	781.29	2.6	4.4	136	816	6526	12	2
BdTR5b	12246	BVZ0032	Pip	Wagga_Winter	Conviron 3	14C3	696	3.8	0.01197	0.01947	107.3	883.2	2.8	5.1	139	848	6775	12	0
BdTR5c	12288	BVZ0032	Pip	Wagga_Winter	Conviron 3	16D4	697	3.9	0.01289	0.01817	100.4	822.88	3	5.2	140	852	6801	11	0
BdTR5d	12077	BVZ0032	Pip	Wagga_Winter	Conviron 3	5B1	698	4.2	0.01381	0.01817	92.71	753.29	2.6	4.8	126	674	5536	9	2
BdTR5e	12104	BVZ0032	Pip	Wagga_Winter	Conviron 3	6C5	699	4.2	0.01565	0.01687	89.51	727.31	2.8	4.9	128	701	5697	9	2
BdTR5f	12191	BVZ0032	Pip	Wagga_Winter	Conviron 3	11C2	700	3.8	0.01289	0.01687	103.84	843.68	2.8	5.2	139	829	6604	9	1
BdTR5g	12214	BVZ0032	Pip	Wagga_Winter	Conviron 3	12D2	701	3.8	0.01197	0.01687	103.84	843.68	2.8	5.4	137	805	6442	9	1
BdTR5h	12033	BVZ0032	Pip	Wagga_Winter	Conviron 3	2D1	702	4.2	0.01381	0.01817	92.71	753.29	2.8	5.3	135	781	6274	9	1
BdTR5i	12011	BVZ0032	Pip	Wagga_Winter	Conviron 3	1C2	703	4.2	0.01473	0.01817	92.71	753.29	2.2	5.2	134	769	6191	9	1
BdTR5j	12143	BVZ0032	Pip	Wagga_Winter	Conviron 3	8D3	704	4.3	0.01473	0.01817	89.51	727.31	2.8	4.8	130	723	5860	9	1
BdTR5k	12175	BVZ0032	Pip	Wagga_Winter	Conviron 3	10C4	705	3.9	0.01289	0.01687	99.84	811.23	2.6	5.5	139	829	6604	9	1
BdTR5m	12061	BVZ0032	Pip	Wagga_Winter	Conviron 3	4B3	706	3.9	0.01381	0.01687	96.54	791.23	2.6	5.6	133	772	6222	11	1
BdTR5n	12096	BVZ0032	Pip	Wagga_Winter	Conviron 3	6B2	707	4.2	0.01381	0.01817	92.71	753.29	2.8	5.5	135	781	6274	9	2
BdTR5o	12182	BVZ0032	Pip	Wagga_Winter	Conviron 3	11A3	708	3.8	0.01381	0.01687	100.4	822.88	3	4.8	140	852	6801	11	2
BdTR7a	12116	BVZ0032	Pip	Wagga_Winter	Conviron 3	7B4	709	4.2	0.01657	0.01687	86.55	709.38	2.2	3.5	150	961	7643	11	2
BdTR7b	12146	BVZ0032	Pip	Wagga_Winter	Conviron 3	9A3	710	4.3	0.01289	0.01817	89.51	727.31	2.2	3.6	152	970	7695	9	2
BdTR8a	12081	BVZ0032	Pip	Wagga_Winter	Conviron 3	5B5	711	4.4	0.01473	0.01947	89.51	727.31	1.8	3.8	137	805	6442	9	2
BdTR8c	12244	BVZ0032	Pip	Wagga_Winter	Conviron 3	14C1	117	4.2	0.01565	0.01687	89.51	727.31	2.4	3.7	139	829	6604	9	2
BdTR8i	12249	BVZ0032	Pip	Wagga_Winter	Conviron 3	14D1	119	3.1	0.00737	0.01687	139.45	1142.89	1.6	2.6	157	1066	8219	11	0
BdTR8m	12080	BVZ0032	Pip	Wagga_Winter	Conviron 3	5B4	120	4.5	0.01197	0.02077	89.51	727.31	2	4.1	139	829	6604	9	2
BdTR8n	12223	BVZ0032	Pip	Wagga_Winter	Conviron 3	13B3	121	4.2	0.01657	0.01687	86.55	709.38	2.2	4.2	135	796	6390	11	2
BdTR9a	12139	BVZ0032	Pip	Wagga_Winter	Conviron 3	8C4	717	4.5	0.01105	0.02077	89.51	727.31	2.8	5	120	612	5063	9	2
BdTR9b	12046	BVZ0032	Pip	Wagga_Winter	Conviron 3	3C1	718	4.5	0.01473	0.02077	89.51	727.31	2.8	4.8	120	612	5063	9	2
BdTR9c	12205	BVZ0032	Pip	Wagga_Winter	Conviron 3	12B3	719	4.2	0.01657	0.01687	89.51	727.31	2.8	4.7	123	642	5297	9	1
BdTR9e	12156	BVZ0032	Pip	Wagga_Winter	Conviron 3	9C3	720	4.4	0.01197	0.01947	89.51	727.31	2.8	4.7	124	653	5376	9	2
BdTR9f	12148	BVZ0032	Pip	Wagga_Winter	Conviron 3	9A5	721	4.1	0.01381	0.01817	92.97	761.93	2.8	4.3	121	634	5245	11	2
BdTR9g	12043	BVZ0032	Pip	Wagga_Winter	Conviron 3	3B3	722	4.5	0.01289	0.02077	89.51	727.31	2.4	4.6	123	642	5297	9	2
BdTR9h	12024	BVZ0032	Pip	Wagga_Winter	Conviron 3	2B2	723	4.3	0.01565	0.01947	92.71	753.29	3	4.3	121	622	5140	9	2
BdTR9i	12165	BVZ0032	Pip	Wagga_Winter	Conviron 3	10A4	724	4.3	0.01473	0.01817	86.55	709.38	2.8	4.6	118	603	5011	11	2
BdTR9j	12245	BVZ0032	Pip	Wagga_Winter	Conviron 3	14C2	725	4.2	0.01289	0.01817	92.71	753.29	3	4.2	123	642	5297	9	2
BdTR9k	12212	BVZ0032	Pip	Wagga_Winter	Conviron 3	12C5	726	4.4	0.01381	0.01947	89.51	727.31	2.8	4.4	111	526	4084	9	2
BdTR9m	12170	BVZ0032	Pip	Wagga_Winter	Conviron 3	10B4	727	4.4	0.01289	0.01947	89.51	727.31	2.6	4.9	121	622	5140	9	2
Bis-1	12242	BVZ0032	Pip	Wagga_Winter	Conviron 3	14B4	768	4.9	0.03038	0.02077	78.66	639.15	2.4	3.4	110	517	3945	9	1
Cas-2	12190	BVZ0032	Pip	Wagga_Winter	Conviron 3	11C1	770	3.8	0.01473	0.01558	96.54	791.23	2.6	3.6	124	665	5484	11	2
Cas-2003	12134	BVZ0032	Pip	Wagga_Winter	Conviron 3	8B4	769	3.8	0.01381	0.01558	96.54	791.23	2.4	4	122	644	5324	11	2
Gal1	12142	BVZ0032	Pip	Wagga_Winter	Conviron 3	8D2	771	4.1	0.01473	0.01687	89.64	734.72	2.8	4.7	130	737	5972	11	2
Gaz1	12058	BVZ0032	Pip	Wagga_Winter	Conviron 3	4A5	780	4.3	0.01381	0.01947	92.71	753.29	2.8	3.8	121	622	5140	9	2
Gaz-2	12050	BVZ0032	Pip	Wagga_Winter	Conviron 3	3C5	772	4.3	0.01565	0.01817	89.51	727.31	2.8	4.6	117	582	4832	9	2
Gaz-3	12220	BVZ0032	Pip	Wagga_Winter	Conviron 3	13A5	773	4.5	0.01473	0.02077	89.51	727.31	2.8	4.7	120	612	5063	9	2
Gaz-4	12257	BVZ0032	Pip	Wagga_Winter	Conviron 3	15B1	774	4.1	0.01289	0.01817	92.97	761.93	2.8	4.3	118	603	5011	11	2
Gaz-5	12057	BVZ0032	Pip	Wagga_Winter	Conviron 3	4A4	775	4.4	0.01197	0.01947	89.51	727.31	3	4.4	113	544	4510	9	2
Gaz6	12054	BVZ0032	Pip	Wagga_Winter	Conviron 3	3D4	776	4.5	0.01381	0.02077	89.51	727.31	3	4.6	120	612	5063	9	2
Gaz-7	12229	BVZ0032	Pip	Wagga_Winter	Conviron 3	13C4	777	4.6	0.01197	0.02207	89.51	727.31	3	4.4	111	526	4084	9	2
Gaz-8	12144	BVZ0032	Pip	Wagga_Winter	Conviron 3	8D4	778	4.5	0.01105	0.02336	96.15	781.19	2.4	3.2	110	517	3945	9	2
Gaz-9	12030	BVZ0032	Pip	Wagga_Winter	Conviron 3	2C3	779	4.3	0.01749	0.01817	89.51	727.31	3	4.1	123	642	5297	9	2
Kah-1	12247	BVZ0032	Pip	Wagga_Winter	Conviron 3	14C4	781	4.4	0.01565	0.01947	89.51	727.31	3	4.2	121	622	5140	9	2
Kah-2	12209	BVZ0032	Pip	Wagga_Winter	Conviron 3	12C2	782	3.8	0.01105	0.01687	103.84	843.68	3	4.5	137	805	6442	9	2
Kah-3	12132	BVZ0032	Pip	Wagga_Winter	Conviron 3	8B2	783	4.5	0.01381	0.02077	89.51	727.31	2.8	5.3	128	701	5697	9	1
Kah4	12154	BVZ0032	Pip	Wagga_Winter	Conviron 3	9C1	784	4.2	0.01473	0.01687	89.51	727.31	2.8	5	121	622	5140	9	1
Kah-5	12171	BVZ0032	Pip	Wagga_Winter	Conviron 3	10B5	785	4.3	0.01289	0.01817	89.51	727.31	3	5.7	121	622	5140	9	1
Kah-6	12089	BVZ0032	Pip	Wagga_Winter	Conviron 3	5D3	786	4.5	0.01381	0.02207	89.64	734.72	2.4	4.6	122	644	5324	11	2
Koz1	12086	BVZ0032	Pip	Wagga_Winter	Conviron 3	5C5	790	4.9	0.01473	0.01817	74.17	602.63	2.4	4.4	118	592	4908	9	2
Koz-2	12041	BVZ0032	Pip	Wagga_Winter	Conviron 3	3B1	787	4.7	0.01381	0.01947	81.12	659.13	2.4	4.7	124	653	5376	9	3
Koz-3	12100	BVZ0032	Pip	Wagga_Winter	Conviron 3	6C1	788	4.4	0.01381	0.01947	89.51	727.31	2.4	4.3	135	781	6274	9	2
Koz-4	12278	BVZ0032	Pip	Wagga_Winter	Conviron 3	16B4	789	4.4	0.01013	0.02077	92.71	753.29	3	5.2	126	674	5536	9	1
Mig3	12233	BVZ0032	Pip	Wagga_Winter	Conviron 3	13D3	793	4.4	0.01381	0.02077	92.71	753.29	2.2	2.8	152	970	7695	9	2
Mon2	12065	BVZ0032	Pip	Wagga_Winter	Conviron 3	4C2	794	3.8	0.01473	0.01558	96.54	791.23	2.2	4.4	140	852	6801	11	2
Mon3	12164	BVZ0032	Pip	Wagga_Winter	Conviron 3	10A3	795	4.3	0.01381	0.01947	89.64	734.72	3	3.9	121	634	5245	11	2
Mur2-31	12183	BVZ0032	Pip	Wagga_Winter	Conviron 3	11A4	796	3.7	0.01105	0.01947	112.18	923.35	3	4.8	160	1121	8498	12	2
Pal2032	12004	BVZ0032	Pip	Wagga_Winter	Conviron 3	1A5	797	4.1	0.01473	0.01687	92.71	753.29	2.6	4.3	128	701	5697	9	2
RUP1-2	12005	BVZ0032	Pip	Wagga_Winter	Conviron 3	1B1	TBC	4.2	0.01289	0.02077	96.54	791.23	4.8	10.4	115	573	4780	11	2
Tek-1	12239	BVZ0032	Pip	Wagga_Winter	Conviron 3	14B1	798	4.5	0.01565	0.02077	86.55	709.38	1.8	3.2	178	1387	9814	11	2
Tek-10	12218	BVZ0032	Pip	Wagga_Winter	Conviron 3	13A3	49	4.2	0.01289	0.01817	89.64	734.72	2.2	4.7	161	1125	8524	11	2
Tek-11	12261	BVZ0032	Pip	Wagga_Winter	Conviron 3	15B5	50	4.6	0.01381	0.01947	80.97	663.62	2	3.5	157	1066	8219	11	2
Tek-12	12152	BVZ0032	Pip	Wagga_Winter	Conviron 3	9B4	801	3.9	0.01381	0.01817	100.4	822.88	2	3.8	169	1251	9091	11	0
Tek-3	12275	BVZ0032	Pip	Wagga_Winter	Conviron 3	16B1	803	3.9	0.01381	0.01687	94.92	781.29	2.6	3.8	156	1062	8193	12	2
Tek-4	12128	BVZ0032	Pip	Wagga_Winter	Conviron 3	8A3	804	4.2	0.01473	0.01947	96.15	781.19	2.6	4.4	156	1026	8030	9	2
Tek-5	12243	BVZ0032	Pip	Wagga_Winter	Conviron 3	14B5	805	4.5	0.01657	0.02077	86.55	709.38	2	3.2	119	613	5088	11	2
Tek-7	12285	BVZ0032	Pip	Wagga_Winter	Conviron 3	16D1	807	4.1	0.01289	0.02077	103.84	843.68	2.2	3.8	142	860	6853	9	2
Tek-8	12111	BVZ0032	Pip	Wagga_Winter	Conviron 3	7A4	808	4.6	0.01565	0.01947	83.74	680.39	2.2	3.7	139	829	6604	9	2
Tek-9	12035	BVZ0032	Pip	Wagga_Winter	Conviron 3	2D3	48	4.6	0.01565	0.02207	89.51	727.31	2	3.9	152	970	7695	9	2
UKR-99-137	12021	BVZ0032	Pip	Wagga_Winter	Conviron 3	2A4	839	4.5	0.01749	0.01817	83.74	680.39	2.2	2.9	187	1515	10417	9	2
Uni2	12178	BVZ0032	Pip	Wagga_Winter	Conviron 3	10D2	810	4.3	0.01381	0.01947	89.64	734.72	2.2	3.6	154	1018	7978	11	2
WLE1-2						average	TBC	3.9	0.01455	0.0161	88.32	737.53	2.6	4.6	121	671	5520	16	1

## Sheet: S07 - BVZ0032 - Spring - data
Accession	PlantID	Name	ExperimentID	User	Condition	Location	Tray	AccessionID	Huan_EV	GR1	GR2	Phyll_TT	Phyll_PTU	L3Width	L3Length	EarEmerg_days	EarEmerg_TT	EarEmerg_PTU	EarEmerg_Late	Emerg_days	Tiller_EV	ColTiller_EV
ABR2	12575	ABR2_s	BVZ0032	Pip	Wagga_Spring	Conviron 4	16D3	615	5.2	0.00855	0.00743	106.982	557.703	2.2	5	80	1143	5450	E	8	5	1
ABR3	12513	ABR3_s	BVZ0032	Pip	Wagga_Spring	Conviron 4	13B5	616	6.2	0.01139	0.00929	88.772	462.774	2.8	4.1				L	8	7	0
ABR4	12492	ABR4_s	BVZ0032	Pip	Wagga_Spring	Conviron 4	12B2	617	4.8	0.00855	0.00781	101.895	532.929	2.2	3.9				L	11	3	0
ABR5	12295	ABR5_s	BVZ0032	Pip	Wagga_Spring	Conviron 4	1B3	618	5.5	0.01025	0.00818	97.03	505.823	2.2	3.2	102	1584	7463	E	8	5	2
ABR7	12306	ABR7_s	BVZ0032	Pip	Wagga_Spring	Conviron 4	1D4	619	5.4	0.00968	0.00929	99.34	517.867	2.4	3.5	93	1399	6671	E	8	3	0
Abz1021	12506	Abz1021_s	BVZ0032	Pip	Wagga_Spring	Conviron 4	13A3	621	4.8	0.00855	0.00743	107.187	558.997	2.6	5.5	104	1637	7670	E	9	4	0
Adi-1	12484	Adi-1_s	BVZ0032	Pip	Wagga_Spring	Conviron 4	11D2	622	5.4	0.00798	0.00781	99.34	517.867	3	5.1	71	970	4699	E	8	4	0
Adi-10	12489	Adi-10_s	BVZ0032	Pip	Wagga_Spring	Conviron 4	12A4	623	5.4	0.00798	0.00818	96.979	505.76	2.8	4.1	70	960	4649	E	9	5	0
Adi-11	12365	Adi-11_s	BVZ0032	Pip	Wagga_Spring	Conviron 4	5B1	624	5.2	0.00968	0.00855	104.438	544.664	2.8	5.3	72	996	4818	E	9	4	0
Adi-13	12486	Adi-13_s	BVZ0032	Pip	Wagga_Spring	Conviron 4	11D4	625	5.3	0.00968	0.00892	104.438	544.664	3.2	5.6	70	960	4649	E	9	3	0
Adi-14	12500	Adi-14_s	BVZ0032	Pip	Wagga_Spring	Conviron 4	12C5	626	5.7	0.01139	0.00781	92.718	483.342	2.8	4.7	72	988	4784	E	8	5	0
Adi-15	12299	Adi-15_s	BVZ0032	Pip	Wagga_Spring	Conviron 4	1C2	627	5.6	0.00855	0.00855	97.03	505.823	3	5.5	75	1043	5038	E	8	3	0
Adi-16	12480	Adi-16_s	BVZ0032	Pip	Wagga_Spring	Conviron 4	11C3	628	5.3	0.00741	0.00743	101.763	530.498	3	4.2	71	970	4699	E	8	3	0
Adi-17	12370	Adi-17_s	BVZ0032	Pip	Wagga_Spring	Conviron 4	5C1	629	5.2	0.01025	0.00781	104.438	544.664	2.8	3.7	68	924	4480	E	9	3	0
Adi-18	12563	Adi-18_s	BVZ0032	Pip	Wagga_Spring	Conviron 4	16B1	630	5.5	0.00798	0.00818	97.03	505.823	2.8	4.7	74	1024	4953	E	8	5	0
Adi-2	12479	Adi-2_s	BVZ0032	Pip	Wagga_Spring	Conviron 4	11C2	631	5.1		0.00818	104.438	544.664	3	5.5	72	996	4818	E	9	3	0
Adi-3	12303	Adi-3_s	BVZ0032	Pip	Wagga_Spring	Conviron 4	1D1	632	5.4	0.00968	0.00818	92.19	482.174	2.8	4.2	71	994	4803	E	11	3	0
Adi-6	12291	Adi-6_s	BVZ0032	Pip	Wagga_Spring	Conviron 4	1A4	633	4.9	0.00911	0.00743	106.982	557.703	3	5.2	69	934	4531	E	8	3	0
Adi-7	12408	Adi-7_s	BVZ0032	Pip	Wagga_Spring	Conviron 4	7C3	634	5.6	0.00684	0.00781	97.03	505.823	3.2	5.3	45	591	2941	E	8	6	2
Adi-8	12313	Adi-8_s	BVZ0032	Pip	Wagga_Spring	Conviron 4	2B3	635	5.6	0.00968	0.00818	97.03	505.823	3	4.1	75	1043	5038	E	8	4	0
Adi-9	12564	Adi-9_s	BVZ0032	Pip	Wagga_Spring	Conviron 4	16B2	636	5.4	0.00741	0.00818	104.438	544.664	3	4.3	68	924	4480	E	9	3	0
Arn1	12559	Arn1_s	BVZ0032	Pip	Wagga_Spring	Conviron 4	16A2	637	4.6	0.00741	0.00743	110.629	578.609	2.2	3.7	66	904	4381	E	11	2	0
Arn1018	12298	Arn1018_s	BVZ0032	Pip	Wagga_Spring	Conviron 4	1C1	638	5.2	0.00968	0.00781	99.282	519.264	2.6	3.6	104	1659	7745	E	11	5	0
Bar1020	12504	Bar1020_s	BVZ0032	Pip	Wagga_Spring	Conviron 4	12D4	639	5.3	0.00855	0.00892	104.438	544.664	3	5.3	79	1133	5399	E	9	4	2
BD18-1		avg.	BVZ0032	Pip	Wagga_Spring	Conviron 4		640	5.8	0.01177	0.00694	84.474	440.427	2.3	3.3	87	1275	6069	E	8	5	0
BD2-3	12325	BD2-3_s	BVZ0032	Pip	Wagga_Spring	Conviron 4	3A2	641	5.6	0.00855	0.00855	94.825	494.327	2.8	5.9	66	882	4280	E	8	5	0
BD21		avg	BVZ0032	Pip	Wagga_Spring	Conviron 4		204	5.4	0.00921	0.00855	100.559	524.361	3.3	4.8	61	796	3933	E	9	4	0
BD21-3	12490	BD21-3_s	BVZ0032	Pip	Wagga_Spring	Conviron 4	12A5	643	6.2	0.00855	0.00929	88.546	461.78	3.4	4.8	60	787	3895	E	9	5	0
BD3-1	12302	BD3-1_s	BVZ0032	Pip	Wagga_Spring	Conviron 4	1C5	645	5.3	0.00855	0.00706	97.03	505.823	3	4.6	61	797	3946	E	8	4	0
BD3-2	12292	BD3-2_s	BVZ0032	Pip	Wagga_Spring	Conviron 4	1A5	812		0.00855		97.03	505.823	3	4.4	61	797	3946	E	8	4	0
BD30-1	12354	BD30-1_s	BVZ0032	Pip	Wagga_Spring	Conviron 4	4C3	646	5.3	0.01082	0.00743	99.34	517.867	2.2	3.5	71	970	4699	E	8	3	0
Bdis03-1	12396	Bdis03-01_s	BVZ0032	Pip	Wagga_Spring	Conviron 4	6D4	1199	5.3	0.00968	0.00706	99.34	517.867	2.2	3.4	69	934	4531	E	8	4	2
Bdis03-5	12572	Bdis03-05_s	BVZ0032	Pip	Wagga_Spring	Conviron 4	16C5	1200	5.7	0.01139	0.00855	94.825	494.327	2.4	3.3	69	934	4531	E	8	4	2
Bdis03-6	12329	Bdis03-06_s	BVZ0032	Pip	Wagga_Spring	Conviron 4	3B1	1201	4.7	0.00798	0.00706	101.895	532.929	2.8	4.1	74	1050	5055	E	11	5	1
Bdis03-9	12487	Bdis03-09_s	BVZ0032	Pip	Wagga_Spring	Conviron 4	12A2	1202	4.9	0.00911	0.00781	104.649	547.332	2.4	3.3	66	904	4381	E	11	3	0
Bdis03-10	12403	Bdis03-10_s	BVZ0032	Pip	Wagga_Spring	Conviron 4	7B3	1203	5.3	0.01025	0.00669	94.825	494.327	2.6	3.6	69	934	4531	E	8	5	2
Bdis03-11	12346	Bdis03-11_s	BVZ0032	Pip	Wagga_Spring	Conviron 4	4A5	1204	4.7	0.00855	0.00669	107.187	558.997	2.2	3.4	70	960	4649	E	9	3	0
Bdis03-12	12497	Bdis03-12_s	BVZ0032	Pip	Wagga_Spring	Conviron 4	12C2	1205	5.1	0.00911	0.00743	106.982	557.703	2.2	3.5	69	934	4531	E	8	4	1
Bdis03-13	12338	Bdis03-13_s	BVZ0032	Pip	Wagga_Spring	Conviron 4	3C5	1206	5.2	0.00798	0.00743	99.34	517.867	2.4	3.5	69	934	4531	E	8	4	1
Bdis03-14	12476	Bdis03-14_s	BVZ0032	Pip	Wagga_Spring	Conviron 4	11B4	1207	5.1	0.01082	0.00818	104.438	544.664	2.8	4.2	68	924	4480	E	9	6	1
Bdis03-15	12369	Bdis03-15_s	BVZ0032	Pip	Wagga_Spring	Conviron 4	5B5	1208	5.2	0.00855	0.00706	99.34	517.867	2.2	3.6	70	952	4615	E	8	4	2
Bdis03-16	12430	Bdis03-16_s	BVZ0032	Pip	Wagga_Spring	Conviron 4	8D2	1209	4.7	0.00855	0.00706	99.114	522.962	2	3.5	65	919	4459	E	14	3	0
Bdis03-17	12454	Bdis03-17_s	BVZ0032	Pip	Wagga_Spring	Conviron 4	10A5	1210	5.1	0.00968	0.00743	106.982	557.703	2.2	3	70	952	4615	E	8	3	2
Bdis03-18	12423	Bdis03-18_s	BVZ0032	Pip	Wagga_Spring	Conviron 4	8B5	1211	5.2	0.00855	0.00706	99.34	517.867	2.6	3.5	69	934	4531	E	8	5	2
Bdis03-19	12305	Bdis03-19_s	BVZ0032	Pip	Wagga_Spring	Conviron 4	1D3	1212	5.4	0.01082	0.00781	96.979	505.76	2.6	3.5	68	924	4480	E	9	4	0
Bdis05-1	12378	Bdis05-01_s	BVZ0032	Pip	Wagga_Spring	Conviron 4	5D4	1213	5.1	0.00911	0.00818	99.282	519.264	2.8	3.6	75	1068	5136	E	11	4	2
Bdis05-7	12375	Bdis05-07_s	BVZ0032	Pip	Wagga_Spring	Conviron 4	5D1	1170	5.6	0.00911	0.00892	92.19	482.174	2.8	3.8	76	1088	5218	E	11	4	0
Bdis05-9	12376	Bdis05-09_s	BVZ0032	Pip	Wagga_Spring	Conviron 4	5D2	1171	4.8	0.00798	0.00743	99.282	519.264	2.8	3.9	76	1088	5218	E	11	4	1
Bdis05-11	12450	Bdis05-11_s	BVZ0032	Pip	Wagga_Spring	Conviron 4	9D4	1173	5.1	0.00911	0.00818	99.282	519.264	2.6	4	72	1013	4888	E	11	4	1
Bdis05-12	12327	Bdis05-12_s	BVZ0032	Pip	Wagga_Spring	Conviron 4	3A4	1174	5.4	0.01025	0.00818	96.979	505.76	2.2	2.8	76	1070	5154	E	9	4	1
Bdis05-13	12472	Bdis05-13_s	BVZ0032	Pip	Wagga_Spring	Conviron 4	11A5	1175	5.1	0.00968	0.00818	104.438	544.664	2.4	3.4	74	1033	4987	E	9	4	0
Bdis05-14	12360	Bdis05-14_s	BVZ0032	Pip	Wagga_Spring	Conviron 4	4D4	1176	6.3	0.00968	0.01264	106.982	557.703	4	6	80	1143	5450	E	8	6	1
Bdis05-15	12342	Bdis05-15_s	BVZ0032	Pip	Wagga_Spring	Conviron 4	3D4	1177	5.3	0.00968	0.00892	92.19	482.174	2.2	4	73	1031	4973	E	11	6	1
Bdis05-16	12501	Bdis05-16_s	BVZ0032	Pip	Wagga_Spring	Conviron 4	12D1	1178	4.8	0.00911	0.00706	110.084	574.105	4.2	8.6	86	1268	6010	E	9	4	1
Bdis05-17	12383	Bdis05-17_s	BVZ0032	Pip	Wagga_Spring	Conviron 4	6B1	1179	4.7	0.00741	0.00743	85.258	400.658	2.4	3.6	70	1049	4797	E	18	3	0
Bdis05-18	12293	Bdis05-18_s	BVZ0032	Pip	Wagga_Spring	Conviron 4	1B1	1180	5.3	0.00968	0.00781	92.19	482.174	2.8	3.9	72	1013	4888	E	11	4	0
Bdis05-19	12311	Bdis05-19_s	BVZ0032	Pip	Wagga_Spring	Conviron 4	2B1	1181	4.8	0.00911	0.00706	99.282	519.264	2.6	4	74	1050	5055	E	11	4	1
Bdis22-1	12546	Bdis22-01_s	BVZ0032	Pip	Wagga_Spring	Conviron 4	15B2	1182	5.2	0.00968	0.00855	99.282	519.264	2.2	3.2				L	11	3	0
Bdis22-4	12394	Bdis22-04_s	BVZ0032	Pip	Wagga_Spring	Conviron 4	6D2	1183	6.2	0.01139	0.00855	85.149	443.886	2.6	3.6	75	1043	5038	E	8	7	0
Bdis22-5	12491	Bdis22-05_s	BVZ0032	Pip	Wagga_Spring	Conviron 4	12B1	1184	5.4	0.01025	0.00743	90.513	472.042	2.6	3.6	92	1389	6620	E	9	4	0
Bdis22-6	12538	Bdis22-06_s	BVZ0032	Pip	Wagga_Spring	Conviron 4	14D2	1185	5.2	0.01025	0.00855	104.438	544.664	2.4	4.4	89	1329	6358	E	9	4	0
Bdis22-10	12527	Bdis22-10_s	BVZ0032	Pip	Wagga_Spring	Conviron 4	14B1	1186	5.5	0.00968	0.00781	94.723	493.998	2.8	3.9	76	1070	5154	E	9	4	0
Bdis22-11	12379	Bdis22-11_s	BVZ0032	Pip	Wagga_Spring	Conviron 4	6A2	1187	6.4	0.01253	0.00966	85.149	443.886	2.8	3.6	79	1118	5368	E	8	7	0
Bdis22-12	12485	Bdis22-12_s	BVZ0032	Pip	Wagga_Spring	Conviron 4	11D3	1188	5.6	0.01082	0.00781	92.718	483.342	3	3.8	75	1043	5038	E	8	6	0
Bdis22-13	12529	Bdis22-13_s	BVZ0032	Pip	Wagga_Spring	Conviron 4	14B3	1189	5.3	0.01082	0.00743	94.723	493.998	2.4	3.8	94	1430	6795	E	9	4	0
Bdis22-14	12435	Bdis22-14_s	BVZ0032	Pip	Wagga_Spring	Conviron 4	9A4	1190	5.5	0.00968	0.00818	97.03	505.823	2.8	4.2	87	1278	6060	E	8	6	0
Bdis22-15	12309	Bdis22-15_s	BVZ0032	Pip	Wagga_Spring	Conviron 4	2A4	1191	5.7	0.00968	0.00781	88.546	461.78	2.8	3.7	85	1248	5920	E	9	7	0
Bdis22-16	12368	Bdis22-16_s	BVZ0032	Pip	Wagga_Spring	Conviron 4	5B4	1192	5.4	0.01082	0.00781	97.03	505.823	2.8	4.8	93	1399	6671	E	8	4	0
Bdis22-17	12470	Bdis22-17_s	BVZ0032	Pip	Wagga_Spring	Conviron 4	11A3	1193	5.2	0.01082	0.00781	106.982	557.703	2.6	4.7	95	1440	6846	E	8	4	0
Bdis22-18	12418	Bdis22-18_s	BVZ0032	Pip	Wagga_Spring	Conviron 4	8A5	1194	6.3	0.01082	0.00892	86.923	453.133	3.2	4	81	1162	5534	E	8	8	0
Bdis22-19	12544	Bdis22-19_s	BVZ0032	Pip	Wagga_Spring	Conviron 4	15A5	1195	5.7	0.01139	0.00855	92.718	483.342	2.4	3.9	80	1143	5450	E	8	7	0
Bdis23-1		avg.	BVZ0032	Pip	Wagga_Spring	Conviron 4		1196	5.2	0.0098	0.00788	101.814	531.18	2.6	4.3				L	9	4	0
Bdis23-2	12443	Bdis23-02_s	BVZ0032	Pip	Wagga_Spring	Conviron 4	9C2	1197	5.3	0.00968	0.00892	104.438	544.664	2.8	4.4	89	1329	6358	E	9	4	0
Bdis23-3	12468	Bdis23-03_s	BVZ0032	Pip	Wagga_Spring	Conviron 4	10D4	1198	5.3	0.01025	0.00818	99.282	519.264	3	5	84	1248	5911	E	11	3	0
Bdis23-5		avg.	BVZ0032	Pip	Wagga_Spring	Conviron 4		1200	5.5	0.01037	0.00833	97.02	505.811	2.6	3.6	107	1677	7899	E	8	5	0
Bdis25-1	12336	Bdis25-01_s	BVZ0032	Pip	Wagga_Spring	Conviron 4	3C3	1201	5.6	0.01025	0.00818	94.825	494.327	2.8	3.7	124	2032	9576	E	8	6	0
Bdis25-4	12503	Bdis25-04_s	BVZ0032	Pip	Wagga_Spring	Conviron 4	12D3	1202	5.6	0.00911	0.00818	94.825	494.327	2.2	4.6	87	1278	6060	E	8	4	0
Bdis25-5	12552	Bdis25-05_s	BVZ0032	Pip	Wagga_Spring	Conviron 4	15C3	1203	5.5	0.00855	0.00818	94.723	493.998	2.4	4.5	82	1190	5651	E	9	4	0
Bdis25-8	12351	Bdis25-08_s	BVZ0032	Pip	Wagga_Spring	Conviron 4	4B5	1204	5.4	0.01082	0.00743	94.825	494.327	2.8	4.1	87	1278	6060	E	8	5	0
Bdis25-10	12548	Bdis25-10_s	BVZ0032	Pip	Wagga_Spring	Conviron 4	15B4	1205	5.3	0.00911	0.00781	106.982	557.703	2.8	4.6	80	1143	5450	E	8	5	0
Bdis25-11	12289	Bdis25-11_s	BVZ0032	Pip	Wagga_Spring	Conviron 4	1A2	1206	5.3	0.00855	0.00706	99.34	517.867	2.4	3.8	80	1143	5450	E	8	4	1
Bdis25-12	12493	Bdis25-12_s	BVZ0032	Pip	Wagga_Spring	Conviron 4	12B3	1207	5.6	0.01253	0.00743	90.513	472.042	2.6	3.4				L	9	5	0
Bdis28-1	12570	Bdis28-01_s	BVZ0032	Pip	Wagga_Spring	Conviron 4	16C3	1208	5.4	0.01082	0.00818	94.723	493.998	2.2	3.7	78	1108	5317	E	9	3	0
Bdis28-2	12392	Bdis28-02_s	BVZ0032	Pip	Wagga_Spring	Conviron 4	6C5	1209	5.8	0.01196	0.00855	86.662	451.955	2.8	4.7	82	1190	5651	E	9	4	0
Bdis28-7	12439	Bdis28-07_s	BVZ0032	Pip	Wagga_Spring	Conviron 4	9B3	1210	5.2	0.00968	0.00855	97.992	515.123	2.2	3.8	77	1127	5368	E	12	3	0
Bdis28-8	12458	Bdis28-08_s	BVZ0032	Pip	Wagga_Spring	Conviron 4	10B4	1211	5.3	0.01025	0.00818	99.282	519.264	2.4	4	84	1248	5911	E	11	3	0
Bdis28-10	12314	Bdis28-10_s	BVZ0032	Pip	Wagga_Spring	Conviron 4	2B4	1212	5.3	0.00968	0.00818	104.438	544.664	2.4	3.7	82	1190	5651	E	9	3	0
Bdis31-1	12432	Bdis31-01_s	BVZ0032	Pip	Wagga_Spring	Conviron 4	8D4	1213	5.2	0.00968	0.00855	106.982	557.703	2.6	5				L	8	5	0
Bdis31-2	12471	Bdis31-02_s	BVZ0032	Pip	Wagga_Spring	Conviron 4	11A4	1214	4.7	0.00798	0.00781	104.649	547.332			99	1554	7313	E	11	4	1
Bdis31-11	12349	Bdis31-11_s	BVZ0032	Pip	Wagga_Spring	Conviron 4	4B3	1215	4.8	0.00855	0.00706	104.438	544.664	2.6	4.1	118	1915	9022	E	9	4	0
Bdis31-12	12528	Bdis31-12_s	BVZ0032	Pip	Wagga_Spring	Conviron 4	14B2	1216	4.8	0.00798	0.00781	107.187	558.997	3	4.4	92	1389	6620	E	9	3	0
Bdis31-13	12388	Bdis31-13_s	BVZ0032	Pip	Wagga_Spring	Conviron 4	6C1	1217	5.6	0.00968	0.00892	92.57	482.77	2.8	4.2	119	1936	9123	E	9	6	0
Bdis31-14	12515	Bdis31-14_s	BVZ0032	Pip	Wagga_Spring	Conviron 4	13C2	1218	5.2	0.00798	0.00929	104.438	544.664	2.8	4.8	106	1679	7844	E	9	5	0
Bdis31-15	12389	Bdis31-15_s	BVZ0032	Pip	Wagga_Spring	Conviron 4	6C2	1219	5.3	0.00911	0.00818	99.344	518.095	2.8	4.4	103	1616	7582	E	9	5	0
Bdis31-16	12541	Bdis31-16_s	BVZ0032	Pip	Wagga_Spring	Conviron 4	15A2	1220	5.1	0.00911	0.00818	104.438	544.664	2.4	4.4	92	1389	6620	E	9	3	0
Bdis31-17	12395	Bdis31-17_s	BVZ0032	Pip	Wagga_Spring	Conviron 4	6D3	1221	5.3	0.00911	0.00892	104.438	544.664	2.6	3.8				L	9	4	2
Bdis31-18	12319	Bdis31-18_s	BVZ0032	Pip	Wagga_Spring	Conviron 4	2C4	1222	4.7	0.00855	0.00706	107.187	558.997	2.2	4.4	103	1616	7582	E	9	5	1
Bdis31-19	12514	Bdis31-19_s	BVZ0032	Pip	Wagga_Spring	Conviron 4	13C1	1223	5.1	0.00855	0.00855	104.438	544.664	2.4	4	94	1430	6795	E	9	4	0
Bdis32-2	12542	Bdis32-02_s	BVZ0032	Pip	Wagga_Spring	Conviron 4	15A3	1224	5.1	0.00911	0.00855	99.282	519.264	2.6	3.8	84	1248	5911	E	11	3	0
BdTR10a	12463	BdTR10a_s	BVZ0032	Pip	Wagga_Spring	Conviron 4	10C4	728	5.5	0.00684	0.00743	97.03	505.823	2.8	4.8	71	970	4699	E	8	6	0
BdTR10b	12441	BdTR10b_s	BVZ0032	Pip	Wagga_Spring	Conviron 4	9B5	729	5.2	0.00741	0.00855	104.438	544.664	2.8	5.3	69	942	4564	E	9	3	0
BdTR10c	12574	BdTR10c_s	BVZ0032	Pip	Wagga_Spring	Conviron 4	16D2	730	5.5	0.00741	0.00781	99.34	517.867	2.2	4.5	69	934	4531	E	8	4	0
BdTR10d	12436	BdTR10d_s	BVZ0032	Pip	Wagga_Spring	Conviron 4	9A5	731	5.2	0.01025	0.00855	104.438	544.664	2.6	4.9	68	924	4480	E	9	4	0
BdTR10e	12422	BdTR10e_s	BVZ0032	Pip	Wagga_Spring	Conviron 4	8B4	732	5.6	0.01025	0.00743	92.718	483.342	3.2	4.8	71	970	4699	E	8	5	0
BdTR10f	12551	BdTR10f_s	BVZ0032	Pip	Wagga_Spring	Conviron 4	15C2	733	5.6	0.00798	0.00743	94.825	494.327	3	4.6	71	970	4699	E	8	5	0
BdTR10g	12517	BdTR10g_s	BVZ0032	Pip	Wagga_Spring	Conviron 4	13C4	734	5.6	0.00684	0.00818	92.718	483.342	3	4.8	69	934	4531	E	8	5	0
BdTR10h	12447	BdTR10h_s	BVZ0032	Pip	Wagga_Spring	Conviron 4	9D1	735	5.3	0.00855	0.00781	106.982	557.703	3	5.3	72	988	4784	E	8	4	0
BdTR10i	12469	BdTR10i_s	BVZ0032	Pip	Wagga_Spring	Conviron 4	11A2	736	5.3	0.01025	0.00892	97.992	515.123	2.2	4.2	68	953	4618	E	12	4	0
BdTR10j	12521	BdTR10j_s	BVZ0032	Pip	Wagga_Spring	Conviron 4	13D3	737	5.5	0.00911	0.00743	99.34	517.867	2.8	4.6	72	988	4784	E	8	4	0
BdTR10k	12401	BdTR10k_s	BVZ0032	Pip	Wagga_Spring	Conviron 4	7B1	738	5.4	0.00911	0.00818	99.344	518.095	2.8	4.7	68	924	4480	E	9	5	0
BdTR10m	12558	BdTR10m_s	BVZ0032	Pip	Wagga_Spring	Conviron 4	15D4	739	5.4	0.00798	0.00818	99.282	519.264	3	4.9	66	904	4381	E	11	4	0
BdTR10n	12533	BdTR10n_s	BVZ0032	Pip	Wagga_Spring	Conviron 4	14C2	740	5.3	0.00798	0.00892	106.982	557.703	3	5.3	66	882	4280	E	8	3	0
BdTR10o	12499	BdTR10o_s	BVZ0032	Pip	Wagga_Spring	Conviron 4	12C4	741	5.3	0.00741	0.00818	104.438	544.664	2.4	5	68	924	4480	E	9	3	0
BdTR11a	12407	BdTR11a_s	BVZ0032	Pip	Wagga_Spring	Conviron 4	7C2	742	5.4	0.00741	0.00781	94.723	493.998	3.8	5.4	68	924	4480	E	9	3	0
BdTR11b	12399	BdTR11b_s	BVZ0032	Pip	Wagga_Spring	Conviron 4	7A4	743	5.6	0.00741	0.00855	94.825	494.327	3.2	5.4	71	970	4699	E	8	4	0
BdTR11c	12363	BdTR11c_s	BVZ0032	Pip	Wagga_Spring	Conviron 4	5A4	744	5.2	0.00741	0.00706	106.982	557.703	3.2	5.3	69	934	4531	E	8	3	0
BdTR11d	12429	BdTR11d_s	BVZ0032	Pip	Wagga_Spring	Conviron 4	8D1	745	5.3	0.00741	0.00743	99.34	517.867	3.8	5.7	70	952	4615	E	8	4	0
BdTR11e	12452	BdTR11e_s	BVZ0032	Pip	Wagga_Spring	Conviron 4	10A3	746	5.3	0.00798	0.00781	99.282	519.264	3.6	5.8	69	958	4634	E	11	3	0
BdTR11f	12566	BdTR11f_s	BVZ0032	Pip	Wagga_Spring	Conviron 4	16B4	747	5.3	0.00911	0.00892	106.982	557.703	3	5.6	69	934	4531	E	8	3	0
BdTR11g	12373	BdTR11g_s	BVZ0032	Pip	Wagga_Spring	Conviron 4	5C4	748	5.2	0.00798	0.00781	106.982	557.703	3.2	5.1	69	934	4531	E	8	3	0
BdTR11h	12488	BdTR11h_s	BVZ0032	Pip	Wagga_Spring	Conviron 4	12A3	749	5.4	0.00855	0.00818	106.982	557.703	3.2	5.9	66	882	4280	E	8	3	0
BdTR11i	12409	BdTR11i_s	BVZ0032	Pip	Wagga_Spring	Conviron 4	7C4	750	5.5	0.00855	0.00781	94.825	494.327	3.6	6	72	988	4784	E	8	4	0
BdTR12a	12438	BdTR12a_s	BVZ0032	Pip	Wagga_Spring	Conviron 4	9B2	751	5.2	0.01025	0.00855	106.982	557.703	3.2	5.6	75	1043	5038	E	8	3	0
BdTR12b	12457	BdTR12b_s	BVZ0032	Pip	Wagga_Spring	Conviron 4	10B3	752	4.6	0.00741	0.00706	107.556	562.536	3.2	6.3	72	1013	4888	E	11	2	0
BdTR12c	12315	BdTR12c_s	BVZ0032	Pip	Wagga_Spring	Conviron 4	2B5	158	5.4	0.00911	0.00781	99.34	517.867	3.4	5.2	70	952	4615	E	8	3	0
BdTR13a	12324	BdTR13a_s	BVZ0032	Pip	Wagga_Spring	Conviron 4	2D4	754	5.6	0.00855	0.01004	97.992	515.123	2.6	4.4	62	847	4114	E	12	3	1
BdTR13b	12524	BdTR13b_s	BVZ0032	Pip	Wagga_Spring	Conviron 4	14A3	755	6.2	0.00968	0.00892	84.856	442.54	2.8	4	65	872	4229	E	9	5	0
BdTR13c	12543	BdTR13c_s	BVZ0032	Pip	Wagga_Spring	Conviron 4	15A4	756	5.8	0.00968	0.00892	94.825	494.327	2.8	4.5	66	882	4280	E	8	5	0
BdTR13d	12494	BdTR13d_s	BVZ0032	Pip	Wagga_Spring	Conviron 4	12B4	757	6.2	0.00911	0.01004	90.702	472.835	2.6	4.6	66	882	4280	E	8	4	0
BdTR13e	12532	BdTR13e_s	BVZ0032	Pip	Wagga_Spring	Conviron 4	14C1	758	5.6	0.00741	0.00855	90.047	470.96	2.6	4.5	66	904	4381	E	11	4	0
BdTR13f	12539	BdTR13f_s	BVZ0032	Pip	Wagga_Spring	Conviron 4	14D3	759	5.8	0.00911	0.00818	92.718	483.342	2.8	4	66	882	4280	E	8	5	0
BdTR13g	12467	BdTR13g_s	BVZ0032	Pip	Wagga_Spring	Conviron 4	10D3	760	5.8	0.00911	0.00781	90.702	472.835	2.6	4.4	66	882	4280	E	8	4	0
BdTR13h	12415	BdTR13h_s	BVZ0032	Pip	Wagga_Spring	Conviron 4	8A2	761	6.2	0.00968	0.00929	86.662	451.955	2.8	3.6	65	872	4229	E	9	5	0
BdTR13i	12481	BdTR13i_s	BVZ0032	Pip	Wagga_Spring	Conviron 4	11C4	762	4.8	0.00798	0.00483	92.57	482.77	3	6	65	872	4229	E	9	3	1
BdTR13j	12330	BdTR13j_s	BVZ0032	Pip	Wagga_Spring	Conviron 4	3B2	763	6	0.00968	0.00781	85.149	443.886	3	4.1	66	882	4280	E	8	5	0
BdTR13k	12331	BdTR13k_s	BVZ0032	Pip	Wagga_Spring	Conviron 4	3B3	764	5.7	0.01082	0.00818	92.718	483.342	2.8	4.4	66	882	4280	E	8	4	0
BdTR13m	12380	BdTR13m_s	BVZ0032	Pip	Wagga_Spring	Conviron 4	6A3	765	6.4	0.01025	0.00929	83.124	433.508	3	5.4	68	924	4480	E	9	5	0
BdTR13n	12386	BdTR13n_s	BVZ0032	Pip	Wagga_Spring	Conviron 4	6B4	766	6.3	0.00911	0.00892	85.149	443.886	3.2	3.9	69	934	4531	E	8	5	0
BdTR13o	12507	BdTR13o_s	BVZ0032	Pip	Wagga_Spring	Conviron 4	13A4	767	6.4	0.01025	0.00966	85.149	443.886	2.8	4	66	882	4280	E	8	5	0
BdTR1a	12352	BdTR1a_s	BVZ0032	Pip	Wagga_Spring	Conviron 4	4C1	647	5.4	0.00855	0.00818	101.763	530.498	3.2	4.1	70	952	4615	E	8	4	0
BdTR1b	12310	BdTR1b_s	BVZ0032	Pip	Wagga_Spring	Conviron 4	2A5	648	5.6	0.00968	0.00743	90.702	472.835	3.6	3.9	69	934	4531	E	8	6	0
BdTR1c	12461	BdTR1c_s	BVZ0032	Pip	Wagga_Spring	Conviron 4	10C2	649	5.4	0.00798	0.00743	99.34	517.867	3	4.1	69	934	4531	E	8	4	0
BdTR1d	12530	BdTR1d_s	BVZ0032	Pip	Wagga_Spring	Conviron 4	14B4	650	5.4	0.00741	0.00818	106.982	557.703	3	4.6	69	934	4531	E	8	4	0
BdTR1e	12350	BdTR1e_s	BVZ0032	Pip	Wagga_Spring	Conviron 4	4B4	651	5.6	0.00968	0.00781	92.718	483.342	3.2	3.8	69	934	4531	E	8	6	0
BdTR1f	12404	BdTR1f_s	BVZ0032	Pip	Wagga_Spring	Conviron 4	7B4	652	5.6	0.01025	0.00781	97.03	505.823	3.2	4.2	69	934	4531	E	8	5	0
BdTR1g	12328	BdTR1g_s	BVZ0032	Pip	Wagga_Spring	Conviron 4	3A5	653	5.7	0.01025	0.00781	90.702	472.835	3.2	3.4	66	882	4280	E	8	6	0
BdTR1h	12526	BdTR1h_s	BVZ0032	Pip	Wagga_Spring	Conviron 4	14A5	654	5.5	0.01082	0.00706	94.723	493.998	3.2	4.1	70	960	4649	E	9	4	0
BdTR1i	12323	BdTR1i_s	BVZ0032	Pip	Wagga_Spring	Conviron 4	2D3	655	5.6	0.00968	0.00743	92.718	483.342	3.2	3.8	69	934	4531	E	8	5	0
BdTR1k	12519	BdTR1k_s	BVZ0032	Pip	Wagga_Spring	Conviron 4	13D1	657	5.6	0.00741	0.00818	97.03	505.823	3.2	4	69	934	4531	E	8	5	0
BdTR1m	12414	BdTR1m_s	BVZ0032	Pip	Wagga_Spring	Conviron 4	7D4	658	5.7	0.01082	0.00743	90.702	472.835	3.2	4.2	69	934	4531	E	8	6	0
BdTR1n	12361	BdTR1n_s	BVZ0032	Pip	Wagga_Spring	Conviron 4	5A2	659	5.3	0.00855	0.00781	106.982	557.703	3	4.1	69	934	4531	E	8	4	0
BdTR2a	12372	BdTR2a_s	BVZ0032	Pip	Wagga_Spring	Conviron 4	5C3	660	5.5	0.00855	0.00818	99.34	517.867	3.2	3.9	69	934	4531	E	8	4	0
BdTR2b	12565	BdTR2b_s	BVZ0032	Pip	Wagga_Spring	Conviron 4	16B3	661	5.5	0.00911	0.00743	94.825	494.327	3	4.2	69	934	4531	E	8	4	0
BdTR2c	12496	BdTR2c_s	BVZ0032	Pip	Wagga_Spring	Conviron 4	12C1	662	5.6	0.00855	0.00818	94.825	494.327	3	4.6	69	934	4531	E	8	6	0
BdTR2d	12455	BdTR2d_s	BVZ0032	Pip	Wagga_Spring	Conviron 4	10B1	663	5.5	0.00911	0.00855	96.979	505.76	3	4.6	68	924	4480	E	9	4	0
BdTR2e	12522	BdTR2e_s	BVZ0032	Pip	Wagga_Spring	Conviron 4	13D4	664	5.6	0.00968	0.00781	97.03	505.823	3	4.2	69	934	4531	E	8	6	0
BdTR2f	12442	BdTR2f_s	BVZ0032	Pip	Wagga_Spring	Conviron 4	9C1	665	5.2		0.00855	106.982	557.703	3	4.9	69	934	4531	E	8	3	0
BdTR2g	12567	BdTR2g_s	BVZ0032	Pip	Wagga_Spring	Conviron 4	16B5	666	5.8	0.00968	0.00855	90.702	472.835	3	4	69	934	4531	E	8	6	0
BdTR2h	12465	BdTR2h_s	BVZ0032	Pip	Wagga_Spring	Conviron 4	10D1	667	5.4	0.00684	0.00743	99.34	517.867	2.8	6	72	988	4784	E	8	4	0
BdTR2i	12518	BdTR2i_s	BVZ0032	Pip	Wagga_Spring	Conviron 4	13C5	668	5.5	0.00855	0.00781	94.825	494.327	3.2	4	69	934	4531	E	8	6	0
BdTR2j	12547	BdTR2j_s	BVZ0032	Pip	Wagga_Spring	Conviron 4	15B3	669	5.4	0.00741	0.00781	99.34	517.867	3.2	4	69	934	4531	E	8	6	0
BdTR2k	12573	BdTR2k_s	BVZ0032	Pip	Wagga_Spring	Conviron 4	16D1	670	5.5	0.00968	0.00706	97.03	505.823	3	4	69	934	4531	E	8	5	0
BdTR2m	12316	BdTR2m_s	BVZ0032	Pip	Wagga_Spring	Conviron 4	2C1	671		0.00684		101.763	530.498	3	4.3	69	934	4531	E	8	5	0
BdTR2n	12362	BdTR2n_s	BVZ0032	Pip	Wagga_Spring	Conviron 4	5A3	672	5.4	0.00798	0.00818	106.982	557.703	3.2	3.7	69	934	4531	E	8	5	0
BdTR2o	12512	BdTR2o_s	BVZ0032	Pip	Wagga_Spring	Conviron 4	13B4	673	5.7	0.00911	0.00781	94.825	494.327	3.2	4.4	66	882	4280	E	8	7	0
BdTR2p	12406	BdTR2p_s	BVZ0032	Pip	Wagga_Spring	Conviron 4	7C1	674	5.5	0.00911	0.00818	97.03	505.823	3.2	4.5	69	934	4531	E	8	5	0
BdTR2r	12397	BdTR2r_s	BVZ0032	Pip	Wagga_Spring	Conviron 4	7A2	675	5.6	0.00911	0.00743	92.718	483.342	3.4	3.8	69	934	4531	E	8	7	0
BdTR2s	12358	BdTR2s_s	BVZ0032	Pip	Wagga_Spring	Conviron 4	4D2	676	4.9	0.00911	0.00743	99.282	519.264	2.8	4.4	67	922	4465	E	11	3	0
BdTR3a	12557	BdTR3a_s	BVZ0032	Pip	Wagga_Spring	Conviron 4	15D3	677	6.1	0.01025	0.00855	88.772	462.774	3	4.3	74	1024	4953	E	8	6	0
BdTR3b	12332	BdTR3b_s	BVZ0032	Pip	Wagga_Spring	Conviron 4	3B4	678	5.8	0.00911	0.00781	90.702	472.835	3	4.7	80	1143	5450	E	8	5	0
BdTR3c	12321	BdTR3c_s	BVZ0032	Pip	Wagga_Spring	Conviron 4	2D1	679	5.9	0.00911	0.00818	88.772	462.774	3	5	83	1200	5702	E	8	6	0
BdTR3d	12576	BdTR3d_s	BVZ0032	Pip	Wagga_Spring	Conviron 4	16D4	680	6.2	0.01025	0.00966	88.772	462.774	3	4.7	74	1024	4953	E	8	5	0
BdTR3e	12478	BdTR3e_s	BVZ0032	Pip	Wagga_Spring	Conviron 4	11C1	681	5.6	0.00855	0.00818	92.57	482.77	3	5.1	82	1190	5651	E	9	4	0
BdTR3f	12417	BdTR3f_s	BVZ0032	Pip	Wagga_Spring	Conviron 4	8A4	682	6.2	0.01025	0.00855	85.149	443.886	3	4.7	80	1143	5450	E	8	8	1
BdTR3g	12561	BdTR3g_s	BVZ0032	Pip	Wagga_Spring	Conviron 4	16A4	683	5.8	0.01025	0.00743	88.772	462.774	3	4.5	81	1162	5534	E	8	5	0
BdTR3h	12553	BdTR3h_s	BVZ0032	Pip	Wagga_Spring	Conviron 4	15C4	684	5.7	0.00855	0.00781	92.718	483.342	3	5.1	75	1043	5038	E	8	6	0
BdTR3i	12398	BdTR3i_s	BVZ0032	Pip	Wagga_Spring	Conviron 4	7A3	685	6.1	0.00968	0.00855	85.149	443.886	3	4.5	80	1143	5450	E	8	7	0
BdTR3j	12556	BdTR3j_s	BVZ0032	Pip	Wagga_Spring	Conviron 4	15D2	686	5.8	0.00968	0.00781	90.702	472.835	3	4.6	74	1024	4953	E	8	6	0
BdTR3k	12384	BdTR3k_s	BVZ0032	Pip	Wagga_Spring	Conviron 4	6B2	687	5.8	0.00911	0.00855	92.718	483.342	3	4.8	83	1200	5702	E	8	7	0
BdTR3m	12413	BdTR3m_s	BVZ0032	Pip	Wagga_Spring	Conviron 4	7D3	688	5.8	0.01025	0.00743	88.772	462.774	2.8	4.8	81	1162	5534	E	8	5	0
BdTR3n	12320	BdTR3n_s	BVZ0032	Pip	Wagga_Spring	Conviron 4	2C5	689	5.9	0.00968	0.00781	88.772	462.774	3	4.8	78	1099	5286	E	8	6	0
BdTR3o	12440	BdTR3o_s	BVZ0032	Pip	Wagga_Spring	Conviron 4	9B4	690	5.7	0.00968	0.00743	92.718	483.342	2.6	4.3	83	1200	5702	E	8	5	0
BdTR3p	12426	BdTR3p_s	BVZ0032	Pip	Wagga_Spring	Conviron 4	8C3	691	5.8	0.00968	0.00706	88.772	462.774	3	4.7	77	1080	5205	E	8	6	0
BdTR3r	12296	BdTR3r_s	BVZ0032	Pip	Wagga_Spring	Conviron 4	1B4	692	5.6	0.00968	0.00818	94.825	494.327	2.6	4.3	83	1200	5702	E	8	4	0
BdTR3s	12534	BdTR3s_s	BVZ0032	Pip	Wagga_Spring	Conviron 4	14C3	693	5.6	0.00855	0.00743	94.825	494.327	2.6	4.5	83	1200	5702	E	8	4	0
BdTR3t	12427	BdTR3t_s	BVZ0032	Pip	Wagga_Spring	Conviron 4	8C4	694	6.1	0.01025	0.00855	86.923	453.133	3	4.7	83	1200	5702	E	8	7	0
BdTR5a	12510	BdTR5a_s	BVZ0032	Pip	Wagga_Spring	Conviron 4	13B2	695	5.2	0.00968	0.00781	106.982	557.703	2.6	5.2	74	1024	4953	E	8	3	0
BdTR5b	12391	BdTR5b_s	BVZ0032	Pip	Wagga_Spring	Conviron 4	6C4	696	5.3	0.00911	0.00781	101.763	530.498	2.8	5.2	78	1099	5286	E	8	4	0
BdTR5c	12536	BdTR5c_s	BVZ0032	Pip	Wagga_Spring	Conviron 4	14C5	697	5.2	0.00968	0.00855	104.438	544.664	3	5.7	73	1014	4902	E	9	3	0
BdTR5d	12466	BdTR5d_s	BVZ0032	Pip	Wagga_Spring	Conviron 4	10D2	698	4.9	0.00855	0.00743	104.438	544.664	2.6	4.1	82	1190	5651	E	9	3	0
BdTR5e	12428	BdTR5e_s	BVZ0032	Pip	Wagga_Spring	Conviron 4	8C5	699	5.4	0.00968	0.00781	99.34	517.867	3	5.5	75	1043	5038	E	8	3	0
BdTR5f	12520	BdTR5f_s	BVZ0032	Pip	Wagga_Spring	Conviron 4	13D2	700	5.1	0.00968	0.00818	104.438	544.664	2.8	5.5	77	1089	5235	E	9	3	0
BdTR5g	12410	BdTR5g_s	BVZ0032	Pip	Wagga_Spring	Conviron 4	7C5	701	5.5	0.00911	0.00818	97.03	505.823	2.8	5.3	70	952	4615	E	8	4	0
BdTR5h	12300	BdTR5h_s	BVZ0032	Pip	Wagga_Spring	Conviron 4	1C3	702	5.1	0.00911	0.00818	104.438	544.664	2.6	5.3	77	1089	5235	E	9	3	0
BdTR5i	12482	BdTR5i_s	BVZ0032	Pip	Wagga_Spring	Conviron 4	11C5	703	4.9		0.00743	104.438	544.664	2.4	5.3	74	1033	4987	E	9	3	0
BdTR5j	12505	BdTR5j_s	BVZ0032	Pip	Wagga_Spring	Conviron 4	13A2	704	5.2	0.00968	0.00855	99.282	519.264	2.8	5.3	73	1031	4973	E	11	3	0
BdTR5k	12525	BdTR5k_s	BVZ0032	Pip	Wagga_Spring	Conviron 4	14A4	705	5.1	0.00968	0.00818	106.982	557.703	2.8	5.4	75	1043	5038	E	8	3	0
BdTR5m	12421	BdTR5m_s	BVZ0032	Pip	Wagga_Spring	Conviron 4	8B3	706	5.2	0.00968	0.00743	106.982	557.703	2.8	5.7	75	1043	5038	E	8	3	0
BdTR5n	12312	BdTR5n_s	BVZ0032	Pip	Wagga_Spring	Conviron 4	2B2	707	4.9	0.00968	0.00669	106.982	557.703	2.8	5.5	78	1099	5286	E	8	3	0
BdTR5o	12297	BdTR5o_s	BVZ0032	Pip	Wagga_Spring	Conviron 4	1B5	708	4.9	0.00968	0.00743	104.438	544.664	2.4	5	75	1051	5072	E	9	3	0
BdTR7a	12374	BdTR7a_s	BVZ0032	Pip	Wagga_Spring	Conviron 4	5C5	709	5.3	0.01025	0.00818	106.982	557.703	2.4	3.4				L	8	4	0
BdTR7b	12412	BdTR7b_s	BVZ0032	Pip	Wagga_Spring	Conviron 4	7D2	710	5.6	0.01025	0.00781	94.825	494.327	2.6	4.1				L	8	4	0
BdTR8a	12475	BdTR8a_s	BVZ0032	Pip	Wagga_Spring	Conviron 4	11B3	711	5.3	0.01082	0.00892	104.438	544.664	2.4	5.5				L	9	5	0
BdTR8c	12462	BdTR8c_s	BVZ0032	Pip	Wagga_Spring	Conviron 4	10C3	117	5.4	0.00968	0.00818	99.344	518.095	2.4	5.3				L	9	4	0
BdTR8i	12549	BdTR8i_s	BVZ0032	Pip	Wagga_Spring	Conviron 4	15B5	119	4.8	0.00911	0.00706	104.438	544.664	2	4				L	9	3	0
BdTR8m	12446	BdTR8m_s	BVZ0032	Pip	Wagga_Spring	Conviron 4	9C5	120	5.5	0.00968	0.00855	96.979	505.76	2.6	4.5				L	9	4	0
BdTR9a	12371	BdTR9a_s	BVZ0032	Pip	Wagga_Spring	Conviron 4	5C2	717	5.6	0.00798	0.00929	99.34	517.867	3.2	5.3	75	1043	5038	E	8	5	0
BdTR9b	12307	BdTR9b_s	BVZ0032	Pip	Wagga_Spring	Conviron 4	2A2	718	5.4	0.00968	0.00818	99.34	517.867	3	3.5	72	988	4784	E	8	5	0
BdTR9c	12416	BdTR9c_s	BVZ0032	Pip	Wagga_Spring	Conviron 4	8A3	719	5.7	0.00968	0.00818	94.825	494.327	3.4	5.2	74	1024	4953	E	8	7	0
BdTR9e	12571	BdTR9e_s	BVZ0032	Pip	Wagga_Spring	Conviron 4	16C4	720	5.6	0.00741	0.00818	99.34	517.867	3.4	5.1	74	1024	4953	E	8	6	0
BdTR9f	12498	BdTR9f_s	BVZ0032	Pip	Wagga_Spring	Conviron 4	12C3	721	5.5	0.00798	0.00855	106.982	557.703	3	5.4	70	952	4615	E	8	4	0
BdTR9g	12347	BdTR9g_s	BVZ0032	Pip	Wagga_Spring	Conviron 4	4B1	722	5.6	0.00911	0.00855	99.34	517.867	3.2	5.7	76	1061	5123	E	8	4	0
BdTR9h	12545	BdTR9h_s	BVZ0032	Pip	Wagga_Spring	Conviron 4	15B1	723	5.2	0.01082	0.00855	104.438	544.664	3	5.6	73	1014	4902	E	9	5	0
BdTR9i	12333	BdTR9i_s	BVZ0032	Pip	Wagga_Spring	Conviron 4	3B5	724	5.6	0.00968	0.00781	94.825	494.327	3	4.5	78	1099	5286	E	8	5	0
BdTR9j	12385	BdTR9j_s	BVZ0032	Pip	Wagga_Spring	Conviron 4	6B3	725	5.5	0.00911	0.00855	99.34	517.867	3	5.5	80	1143	5450	E	8	5	0
BdTR9k	12411	BdTR9k_s	BVZ0032	Pip	Wagga_Spring	Conviron 4	7D1	726	5.7	0.00968	0.00781	90.702	472.835	3.2	5	69	934	4531	E	8	7	0
BdTR9m	12473	BdTR9m_s	BVZ0032	Pip	Wagga_Spring	Conviron 4	11B1	727	5.4	0.00855	0.00855	101.763	530.498	3	5.5	73	1006	4868	E	8	5	0
Bis-1	12425	Bis-1_s	BVZ0032	Pip	Wagga_Spring	Conviron 4	8C2	768	6.2	0.00968	0.00966	86.662	451.955	2.6	4	65	872	4229	E	9	5	0
Cas-2	12345	Cas-2_s	BVZ0032	Pip	Wagga_Spring	Conviron 4	4A4	770	5.2	0.01196	0.00743	99.344	518.095	2.2	3	68	924	4480	E	9	5	1
Cas-2003	12366	Cas-2003_s	BVZ0032	Pip	Wagga_Spring	Conviron 4	5B2	769	4.7	0.00855	0.00706	107.187	558.997	2.2	2.9	69	942	4564	E	9	4	1
Gal1	12550	Gal1_s	BVZ0032	Pip	Wagga_Spring	Conviron 4	15C1	771	4.8	0.00911	0.00706	107.187	558.997	2.2	4.6	82	1190	5651	E	9	3	0
Gaz1	12355	Gaz-1_s	BVZ0032	Pip	Wagga_Spring	Conviron 4	4C4	780	5.3	0.00911	0.00781	106.982	557.703	3	4.7	70	952	4615	E	8	3	0
Gaz-2	12523	Gaz-2_s	BVZ0032	Pip	Wagga_Spring	Conviron 4	14A2	772	5.5	0.01082	0.00855	106.982	557.703	3	4.7	74	1024	4953	E	8	3	0
Gaz-3	12353	Gaz-3_s	BVZ0032	Pip	Wagga_Spring	Conviron 4	4C2	773	5.3	0.00911	0.00781	101.763	530.498	2.8	4.7	75	1043	5038	E	8	3	0
Gaz-4	12402	Gaz-4_s	BVZ0032	Pip	Wagga_Spring	Conviron 4	7B2	774	5.7	0.00968	0.00818	90.702	472.835	3.2	4.4	70	952	4615	E	8	7	0
Gaz-5	12456	Gaz-5_s	BVZ0032	Pip	Wagga_Spring	Conviron 4	10B2	775	5.5	0.00855	0.00818	99.344	518.095	3	4.4	68	924	4480	E	9	5	0
Gaz6	12511	Gaz-6_s	BVZ0032	Pip	Wagga_Spring	Conviron 4	13B3	776	5.5	0.00911	0.00855	97.03	505.823	2.8	4.6	72	988	4784	E	8	4	0
Gaz-7	12562	Gaz-7_s	BVZ0032	Pip	Wagga_Spring	Conviron 4	16A5	777	5.5	0.00968	0.00781	94.825	494.327	2.8	4.3	69	934	4531	E	8	6	0
Gaz-8	12337	Gaz-8_s	BVZ0032	Pip	Wagga_Spring	Conviron 4	3C4	778	5.3	0.00968	0.00892	104.438	544.664	2.6	3.6	68	924	4480	E	9	3	0
Gaz-9	12377	Gaz-9_s	BVZ0032	Pip	Wagga_Spring	Conviron 4	5D3	779	5.4	0.00968	0.00818	99.344	518.095	3	4	69	942	4564	E	9	4	0
Kah-1	12540	Kah-1_s	BVZ0032	Pip	Wagga_Spring	Conviron 4	14D4	781	5.4	0.00968	0.00706	99.34	517.867	2.6	4	74	1024	4953	E	8	3	0
Kah-2	12535	Kah-2_s	BVZ0032	Pip	Wagga_Spring	Conviron 4	14C4	782	5.3	0.00911	0.00892	106.982	557.703	2.4	4.8	74	1024	4953	E	8	3	0
Kah-3	12348	Kah-3_s	BVZ0032	Pip	Wagga_Spring	Conviron 4	4B2	783	5.5	0.00798	0.00818	97.03	505.823	3.2	5.6	72	988	4784	E	8	5	0
Kah4	12341	Kah-4_s	BVZ0032	Pip	Wagga_Spring	Conviron 4	3D3	784	5.4	0.01025	0.00669	94.723	493.998	2.6	3.9	75	1051	5072	E	9	3	0
Kah-5	12393	Kah-5_s	BVZ0032	Pip	Wagga_Spring	Conviron 4	6D1	785	5.8	0.00968	0.00781	88.772	462.774	3.4	4.9	73	1006	4868	E	8	7	0
Kah-6	12477	Kah-6_s	BVZ0032	Pip	Wagga_Spring	Conviron 4	11B5	786	5.5	0.00968	0.00743	97.03	505.823	3	4.7	69	934	4531	E	8	5	0
Koz1	12460	Koz-1_s	BVZ0032	Pip	Wagga_Spring	Conviron 4	10C1	790	5.5	0.01025	0.00781	92.57	482.77	3	5	79	1133	5399	E	9	5	0
Koz-2	12359	Koz-2_s	BVZ0032	Pip	Wagga_Spring	Conviron 4	4D3	787	5.6	0.01025	0.00781	94.825	494.327	2.8	4.5	73	1006	4868	E	8	4	0
Koz-3	12516	Koz-3_s	BVZ0032	Pip	Wagga_Spring	Conviron 4	13C3	788	5.8	0.00741	0.00818	94.825	494.327	2.8	4.5	75	1043	5038	E	8	5	0
Koz-4	12433	Koz-4_s	BVZ0032	Pip	Wagga_Spring	Conviron 4	9A2	789	5.6	0.00855	0.00743	94.825	494.327	3	5.4	83	1200	5702	E	8	5	0
Mig3	12356	Mig3_s	BVZ0032	Pip	Wagga_Spring	Conviron 4	4C5	793	5.2	0.01025	0.00781	106.982	557.703	2.8	4.4	104	1626	7633	E	8	5	0
Mon2	12434	Mon2_s	BVZ0032	Pip	Wagga_Spring	Conviron 4	9A3	794	4.6	0.00911	0.00632	107.556	562.536	2.2	5.9	77	1113	5300	E	11	3	0
Mon3	12322	Mon3_s	BVZ0032	Pip	Wagga_Spring	Conviron 4	2D2	795	5.6	0.01082	0.00781	92.57	482.77	2.8	3.7	69	942	4564	E	9	4	0
Mur2-31	12357	Mur2-31_s	BVZ0032	Pip	Wagga_Spring	Conviron 4	4D1	796	4.7	0.00968	0.00669	107.187	558.997	2.6	5.2				L	9	3	0
Pal2032	12444	Pal2032_s	BVZ0032	Pip	Wagga_Spring	Conviron 4	9C3	797	5.4	0.01025	0.00781	104.438	544.664	2.6	4.8	74	1033	4987	E	9	5	0
RUP1-2	12531	RUP1-2_s	BVZ0032	Pip	Wagga_Spring	Conviron 4	14B5	TBC	6.3	0.00911	0.01264	86.662	451.955	3.2	7	73	1014	4902	E	9	6	0
Tek-1	12555	Tek-1_s	BVZ0032	Pip	Wagga_Spring	Conviron 4	15D1	798	5.7	0.01025	0.00892	94.825	494.327	2	4.2				L	8	6	0
Tek-10	12451	Tek-10_s	BVZ0032	Pip	Wagga_Spring	Conviron 4	10A2	49	5.1	0.00968	0.00818	99.282	519.264	2	5				L	11	3	0
Tek-11	12335	Tek-11_s	BVZ0032	Pip	Wagga_Spring	Conviron 4	3C2	50	5.4	0.00911	0.00818	92.19	482.174	2.6	4.3	99	1554	7313	E	11	4	0
Tek-12	12290	Tek-12_s	BVZ0032	Pip	Wagga_Spring	Conviron 4	1A3	801	5.2	0.00855	0.00929	106.982	557.703	2.2	4.5				L	8	3	0
Tek-3	12537	Tek-3_s	BVZ0032	Pip	Wagga_Spring	Conviron 4	14D1	803	5.4	0.01082	0.00818	99.344	518.095	2.4	4.5				L	9	5	0
Tek-4	12367	Tek-4_s	BVZ0032	Pip	Wagga_Spring	Conviron 4	5B3	804	4.8	0.00741	0.00743	110.084	574.105	2.2	4.7				L	9	2	0
Tek-5	12304	Tek-5_s	BVZ0032	Pip	Wagga_Spring	Conviron 4	1D2	805	5.5	0.01025	0.00966	96.979	505.76	2.2	4.5				L	9	5	0
Tek-6	12405	Tek-6_s	BVZ0032	Pip	Wagga_Spring	Conviron 4	7B5	806	5.6	0.01025	0.00892	94.723	493.998	2.2	4.7				L	9	7	0
Tek-7	12448	Tek-7_s	BVZ0032	Pip	Wagga_Spring	Conviron 4	9D2	807	5.3	0.00911	0.00892	106.982	557.703	2.8	5				L	8	3	0
Tek-8	12390	Tek-8_s	BVZ0032	Pip	Wagga_Spring	Conviron 4	6C3	808	5.7	0.01025	0.00892	92.718	483.342	3	5.2	107	1689	7895	E	8	5	0
Tek-9	12420	Tek-9_s	BVZ0032	Pip	Wagga_Spring	Conviron 4	8B2	48	5.7	0.01082	0.00855	92.718	483.342	2.4	4.8				L	8	7	0
UKR-99-137	12340	UKR-99-137_s	BVZ0032	Pip	Wagga_Spring	Conviron 4	3D2	839	5.8	0.01082	0.00781	88.772	462.774	2.4	3.1				L	8	6	0
Uni2	12509	Uni2_s	BVZ0032	Pip	Wagga_Spring	Conviron 4	13B1	810	5.4	0.00968	0.00781	96.979	505.76	2.4	4.8	89	1329	6358	E	9	6	0
WLE1-2		avg.	BVZ0032	Pip	Wagga_Spring	Conviron 4		TBC	5	0.0082	0.00862	105.552	553.554	2.5	4.8	105	1693	7987	E	12	3	0

## Sheet: S10 - HapMap 74 List
S10. List of HapMap 74 genotypes
ABR2
ABR4
ABR5
Adi1
Adi15
Adi16
Adi18
Adi6
Adi8
Ban1
BAR1020
Bd18-1
Bd21
Bd21-3
Bd3-1
Bd30-1
Bdis05-07
Bdis05-09
Bdis22-01
Bdis22-05
Bdis22-06
Bdis23-01
Bdis23-02
Bdis23-05
Bdis25-01
Bdis25-04
Bdis25-05
Bdis25-10
Bdis28-08
Bdis31-01
Bdis31-02
Bdis32-02
BdTR10c
BdTR10f
BdTR10i
BdTR11a
BdTR11g
BdTR12a
BdTR13c
BdTR13d
BdTR1c
BdTR1d
BdTR1k
BdTR2a
BdTR2j
BdTR2p
BdTR3a
BdTR3b
BdTR3s
BdTR5m
BdTR9a
BdTR9f
Cas1
Cas2
Gal1
Gaz2
Gaz3
Gaz6
Kah4
Kah5
Kah6
Koz2
Koz3
Mig3
Mur3
Pal1
Pal2032
Rei7
Sar2
Sig2
USDA4006
WLE2-2
Yas3

## Sheet: S11 - Climate Change Models
	Maximum Daily Temperature												Minimum Daily Temperature
Model	January	February	March	April	May	June	July	August	September	October	November	December	January	February	March	April	May	June	July	August	September	October	November	December
MRI-CGCM3	0.71	0.47	0.94	0.47	0.78	0.39	0.83	0.98	1.06	0.92	0.8	1.83	0.48	0.92	1	1.06	1.04	0.31	0.84	0.88	0.76	0.76	0.9	1.34
MIROC5	1.02	0.74	1.45	0.84	0.7	1.23	0.89	0.76	0.97	1.18	1.61	0.71	0.99	1.1	1.14	0.79	0.75	0.98	0.73	0.45	0.92	0.79	1.15	0.36
bcc-csm1-1	1.33	0.77	0.94	0.96	0.99	1.56	1.35	1.21	1.33	1.12	1.52	0.74	0.91	0.71	1.44	0.91	0.66	1.29	0.9	0.75	1.18	0.83	0.77	0.66
NorESM1-M	0.93	1.57	1.06	0.63	1.16	1.51	1.17	0.77	1.23	1.5	1.09	0.91	0.84	1.3	0.56	0.34	0.85	1.4	0.47	0.41	0.89	1.15	0.7	1.26
FIO-ESM	1.59	1.23	1.26	1.06	0.98	1.2	1.41	1.23	1.04	1.75	1.53	1.84	1.5	0.97	1.38	0.89	1.16	1.19	1.45	1.19	1.17	1.47	1.14	1.48
bcc-csm1-1-m	1.64	2.25	1.89	1.67	1.43	1.66	1.49	1.71	1.49	1.4	1.36	1.32	1.01	1.61	1.46	1.34	1.5	1.31	0.9	1.2	0.98	1.03	1.08	0.6
CCSM4	1.4	1.31	1.63	1.33	1.84	1.51	1.38	1.22	1.16	1.59	1.98	1.8	1.38	0.73	1.72	0.89	1.14	0.99	0.73	0.89	0.83	1.12	1.57	1.55
HadGEM2-AO	2.1	1.78	2	1.81	1.54	1.43	1.51	1.27	1.76	2.09	1.36	1.8	1.32	0.92	0.82	0.85	0.71	0.8	1.2	0.64	0.8	1.5	0.87	1.3
GFDL-CM3	1.94	2.37	2.32	1.4	0.86	0.76	1.16	1.02	1.66	2.25	1.98	2.4	1.32	1.42	2.27	1.49	0.6	0.56	0.98	0.73	0.71	1.23	1.73	1.78
GFDL-ESM2M	1.29	1.45	1.02	1.56	1.25	0.9	1.08	2.05	2.14	2.58	1.47	1.27	1.07	1.15	0.73	1.49	0.58	0.5	0.48	1.08	1.08	1.7	0.72	1.27
CESM1-CAM5	1.61	1.31	0.74	1.76	1.59	1.94	1.53	1.8	1.76	1.08	1.7	2.1	1.26	1.45	1.07	1.58	1.53	1.57	1.54	1.04	1.3	0.94	1.17	1.54
HadGEM2-ES	2.27	2.85	1.4	1.48	1.16	1.26	1.53	1.68	1.95	2.35	2.18	1.9	1.4	2.52	1.88	2.26	1.37	0.98	1.47	1.42	1.46	0.97	1.77	1.21
Mean	1.49	1.51	1.39	1.25	1.19	1.28	1.28	1.31	1.46	1.65	1.55	1.55	1.12	1.23	1.29	1.16	0.99	0.99	0.97	0.89	1.01	1.12	1.13	1.2
Standard Deviation	0.47	0.71	0.49	0.45	0.35	0.43	0.25	0.42	0.39	0.55	0.39	0.55	0.29	0.5	0.5	0.5	0.35	0.39	0.37	0.31	0.23	0.3	0.38	0.43
Days	15	46	74	105	135	165	196	226	257	288	318	349
Wagga Present Max	31.6	31.2	28.2	22.7	17.7	14.3	13.6	15.3	18.6	22.6	26.8	30.2
Target Max	33.1	32.7	29.6	23.9	18.9	15.6	14.9	16.6	20.1	24.3	28.3	31.8
Wagga Present Min	16.2	16.4	14	9.5	6.5	3.6	2.7	3.9	6.1	9	12	14.7
Target Min	17.3	17.6	15.3	10.7	7.5	4.6	3.7	4.8	7.1	10.1	13.1	15.9
We acknowledge the World Climate Research Programme's Working Group on Coupled Modelling, which is responsible for CMIP, and we thank the climate modeling groups (listed in Table XX of this paper) for producing and making available their model output. For CMIP the U.S. Department of Energy's Program for Climate Model Diagnosis and Intercomparison provides coordinating support and led development …

## Sheet: S12 - BVZ0055 -2015 Temp - Data
PlantID	PlantName	Accession Name	AccessionID	ExperimentID	ExperimentCondition	GrowthLocation	TrayPosition	Emerg_TT	100GW	Huan_23Sep	Huan_25Sep	Huan_27Sep	Huan_30Sep	Huan_02Oct	Huan_05Oct	Huan_07Oct	Huan_09Oct	Huan_12Oct	Huan_14Oct	Huan_19thOct	Huan_21Oct	Huan_23Oct	Huan_26Oct	Huan_28Oct	Huan_30Oct	Huan_02Nov	Huan_06Nov	Huan_09Nov	Huan_13Nov	Huan_16Nov	Huan_25Nov	Huan_GR1	Huan_GR2	Phyll_TT	Phyll_PTU	Tiller_28Oct	Tiller_30Oct	Tiller_02Nov	Tiller_06Nov	Tiller_09Nov	Tiller_13Nov	Tiller_16Nov	Tiller_25Nov	L3Width	L3Length	Height_25Nov	FvFm_1	QY_1	NPQIntSlope_1
27088	ABR2_r1_p	ABR2	4728	BVZ0055	Wagga_Winter_present	Ch03	5C2	106.983	0.4127	1	1	1	1.2	1.2	1.3	1.4	1.5	1.6	1.6	2.1	2.2	2.2	2.3	2.5	2.7	2.8	3.1	3.2	3.5	3.6	4.1	0.046	0.051	120.44	510.304	0	0	0	1	1	1	1	2	2	3.8	6	0.89	0.4	0.0224
27283	ABR2_r4_p	ABR2	4728	BVZ0055	Wagga_Winter_present	Ch03	15D4	106.983	0.4127	1	1	1	1.1	1.2	1.3	1.4	1.5	1.5	1.6	2	2.1	2.2	2.3	2.5	2.6	2.8	3	3.1	3.2	3.5	3.9	0.044	0.055	124.325	526.765	0	0	0	1	1	1	1	2	2	3.6	5	0.88	0.41	0.02485
27092	ABR4_r1_p	ABR4	4730	BVZ0055	Wagga_Winter_present	Ch03	5D1	106.983	0.3868	1	1	1	1	1.1	1.2	1.2	1.3	1.4	1.5	1.6	1.8	2.1	2.3	2.5	2.6	2.8	3.1	3.2	3.5	3.7	4.3	0.036	0.067	120.44	510.304	0	0	0	1	1	1	1	2	2	2.7	3.5	0.89	0.46	0.0174
27121	ABR4_r2_p	ABR4	4730	BVZ0055	Wagga_Winter_present	Ch03	7B3	128.418	0.3868	1	1	1	1	1	1.1	1.1	1.1	1.2	1.4	1.5	1.6	1.6	2.1	2.2	2.3	2.5	2.7	3.1	3.2	3.5	4.1	0.024	0.073	117.41	501.929	0	0	0	0	1	1	1	2	1.5	2.8	3.7	0.88	0.39	0.01905
27189	ABR4_r3_p	ABR4	4730	BVZ0055	Wagga_Winter_present	Ch03	10D4	114.182	0.3868	1	1	1	1	1	1.1	1.2	1.2	1.3	1.4	1.6	1.5	2.1	2.3	2.5	2.5	2.7	3.1	3.1	3.6	3.7	4.3	0.032	0.06	122.003	518.444	0	0	0	0	1	1	1	2	2.25	2.6	3.1	0.87	0.46	0.0272
27284	ABR4_r4_p	ABR4	4730	BVZ0055	Wagga_Winter_present	Ch03	16A1	114.182	0.3868	1	1	1	1	1.1	1.2	1.3	1.4	1.5	1.5	2.1	2.1	2.2	2.4	2.6	2.7	2.7	3.2	3.3	3.5	3.7	4.5	0.046	0.085	114.608	487.023	0	0	1	1	1	1	2	2	2	2.7	3.5	0.89	0.46	0.022
27003	ABR5_r1_p	ABR5	4731	BVZ0055	Wagga_Winter_present	Ch03	1A3	106.983	0.2967	1	1	1	1.1	1.2	1.3	1.4	1.4	1.5	1.6	2.3	2.4	2.5	2.7	2.8	2.8	3.2	3.4	3.6	3.8	4.2	4.9	0.055	0.088	107.058	453.603	0	1	1	1	1	2	2	2	1.5	2.5	3.2	0.88	0.35	0.01715
27117	ABR5_r2_p	ABR5	4731	BVZ0055	Wagga_Winter_present	Ch03	7A4	114.182	0.2967	1	1	1	1.1	1.2	1.3	1.4	1.5	1.6	1.7	2.1	2.3	2.4	2.6	2.6	2.8	3.2	3.5	3.7	3.9	4.2	4.8	0.051	0.073	102.218	434.372	0	1	1	1	1	1	2	3	2	3.1	3.2	0.89	0.4	0.0209
27295	ABR5_r4_p	ABR5	4731	BVZ0055	Wagga_Winter_present	Ch03	16C2	106.983	0.2967	1	1	1	1	1.1	1.2	1.3	1.4	1.4	1.4	2.1	2.2	2.3	2.4	2.5	2.6	2.7	3.2	3.4	3.6	3.8	4.8	0.048	0.103	113.355	480.286	0	0	1	1	1	1	2	2	1.75	2.6	3.4	0.88	0.47	0.0281
27087	Adi-1_r1_p	Adi-1	4735	BVZ0055	Wagga_Winter_present	Ch03	5C1	106.983	0.5537	1	1	1.1	1.2	1.3	1.4	1.6	1.6	1.7	1.8	2.1	2.2	2.3	2.6	2.7	2.8	2.9	3.1	3.4	3.6	3.8	4.5	0.046	0.076	113.355	480.286	0	0	0	0	0	1	2	2	2.5	5	8.1	0.89	0.43	0.0128
27056	Adi-1_r2_p	Adi-1	4735	BVZ0055	Wagga_Winter_present	Ch03	3D3	114.182	0.5537	1	1	1	1	1	1.1	1.2	1.3	1.3	1.4	1.6	1.6	2.1	2.2	2.4	2.5	2.7	2.9	3.1	3.3	3.6	4.1	0.033	0.064	122.003	518.444	0	0	0	0	0	0	0	2	2	3.7	7.6	0.88	0.42	0.0105
27263	Adi-1_r3_p	Adi-1	4735	BVZ0055	Wagga_Winter_present	Ch03	14D2	114.182	0.5537	1	1	1	1	1	1.1	1.2	1.2	1.3	1.4	1.6	1.6	2.1	2.3	2.4	2.6	2.9	2.9	3.1	3.2	3.5	4.2	0.033	0.082	122.003	518.444	0	0	0	0	0	0	0	1	2.25	3.8	7.7	0.88	0.51	0.01465
27221	Adi-1_r4_p	Adi-1	4735	BVZ0055	Wagga_Winter_present	Ch03	12C3	106.983	0.5537	1	1	1	1.1	1.2	1.3	1.4	1.4	1.5	1.7	1.8	1.9	2.1	2.2	2.4	2.5	2.7	2.9	3.1	3.3	3.5	4.2	0.038	0.076	124.325	526.765	0	0	0	0	0	0	0	2	2.25	4.4	7.6	0.87	0.48	0.01225
27010	Adi-15_r1_p	Adi-15	4732	BVZ0055	Wagga_Winter_present	Ch03	1B5	114.182	0.6131	1	1	1.4	1.5	1.6	1.7	1.8	1.9	2	2	2.2	2.3	2.4	2.6	2.6	3.1	3.2	3.5	3.7	3.9	4.1	4.7	0.042	0.067	102.218	434.372	0	0	0	0	0	1	2	2	3	3.9	8.6	0.89	0.61	0.0138
27120	Adi-15_r2_p	Adi-15	4732	BVZ0055	Wagga_Winter_present	Ch03	7B2	114.182	0.6131	1	1	1	1	1	1.1	1.1	1.2	1.4	1.4	1.8	1.8	1.9	2.1	2.2	2.3	2.6	2.8	2.9	3.1	3.2	3.9	0.035	0.069	130.416	554.199	0	0	0	0	0	0	0	2	2	4.3	6.9	0.9	0.45	0.0194
27238	Adi-15_r3_p	Adi-15	4732	BVZ0055	Wagga_Winter_present	Ch03	13C1	145.978	0.6131	1	1	1	1	1	1	1	1.1	1	1	1	1	1	1	1	1	1	1.6	1.8	1.9	2.1	2.5	0	0.049	192.451	836.204	0	0	0	0	0	0	0	0	.	.	3	.	.	.
27019	Adi-16_r1_p	Adi-16	4733	BVZ0055	Wagga_Winter_present	Ch03	1D4	106.983	0.5934	1	1.3	1.4	1.5	1.6	1.7	1.8	1.9	2.1	2.1	2.2	2.4	2.5	2.7	2.8	3.1	3.2	3.5	3.7	4.1	4.1	4.7	0.042	0.054	104.164	441.344	0	0	1	1	1	2	2	2	2.5	4	6.4	0.88	0.41	0.01655
27147	Adi-16_r2_p	Adi-16	4733	BVZ0055	Wagga_Winter_present	Ch03	8C5	106.983	0.5934	1	1.2	1.3	1.4	1.6	1.7	1.8	1.9	1.9	2	2.2	2.4	2.5	2.7	2.9	3.1	3.1	3.4	3.6	3.9	4.1	4.5	0.044	0.049	107.058	453.603	0	0	0	0	0	1	1	2	2.5	4.3	7.1	0.87	0.43	0.0161
27259	Adi-16_r3_p	Adi-16	4733	BVZ0055	Wagga_Winter_present	Ch03	14C3	106.983	0.5934	1	1	1.1	1.2	1.2	1.4	1.5	1.6	1.7	1.8	2.1	2.2	2.4	2.6	2.7	2.9	2.9	3.1	3.4	3.7	3.9	4.4	0.048	0.058	113.355	480.286	0	0	0	0	1	1	1	2	2.25	4.1	7.6	0.84	0.45	0.022
27211	Adi-16_r4_p	Adi-16	4733	BVZ0055	Wagga_Winter_present	Ch03	12A3	106.983	0.5934	1	1.1	1.2	1.3	1.4	1.5	1.6	1.7	1.8	2.1	2.3	2.4	2.6	2.8	2.9	2.9	3.1	3.3	3.5	3.8	3.9	4.6	0.053	0.069	110.116	466.564	0	0	0	1	1	1	2	2	2	3.9	7.4	0.86	0.42	0.0245
27009	Adi-18_r1_p	Adi-18	4734	BVZ0055	Wagga_Winter_present	Ch03	1B4	114.182	0.542	1	1	1	1	1	1	1	1.1	1	1	1.1	1.3	1.3	1.4	2.2	2.3	2.7	2.9	2.9	3.1	3.4	3.9	0.009	0.064	130.416	554.199	0	0	0	0	0	0	0	1	2.5	4	8.5	0.88	0.44	0.0118
27142	Adi-18_r2_p	Adi-18	4734	BVZ0055	Wagga_Winter_present	Ch03	8B5	114.182	0.542	1	1	1	1	1	1	1	1	1.1	1.2	1.3	1.4	2.1	2.2	2.4	2.5	2.6	3	3.1	3.5	3.8	4.2	0.026	0.055	122.003	518.444	0	1	1	1	1	1	1	1	1.5	3.2	7.2	0.9	0.43	0.0104
27239	Adi-18_r3_p	Adi-18	4734	BVZ0055	Wagga_Winter_present	Ch03	13C2	106.983	0.542	1	1	1.1	1.2	1.3	1.5	1.6	1.7	1.8	1.9	2.1	2.2	2.4	2.6	2.8	2.9	3.1	3.2	3.5	3.8	3.9	4.5	0.048	0.06	110.116	466.564	0	0	0	0	1	1	2	2	2.25	4.9	9.1	0.86	0.44	0.01605
27207	Adi-18_r4_p	Adi-18	4734	BVZ0055	Wagga_Winter_present	Ch03	11D3	106.983	0.542	1	1	1	1.1	1.2	1.3	1.4	1.5	1.6	1.7	2.1	2.2	2.3	2.5	2.7	2.9	2.9	3.1	3.2	3.6	3.9	4.4	0.049	0.064	120.44	510.304	0	0	0	0	0	1	1	2	2.25	4.2	7.9	0.88	0.47	0.0172
27112	Adi-6_r1_p	Adi-6	4736	BVZ0055	Wagga_Winter_present	Ch03	6D2	106.983	0.5393	1	1	1.2	1.3	1.4	1.6	1.7	1.8	1.9	1.9	2.1	2.2	2.3	2.4	2.6	2.7	2.9	3.1	3.4	3.6	3.9	4.3	0.044	0.055	113.355	480.286	0	0	0	0	0	0	0	2	2.5	5	9.9	0.89	0.49	0.0155
27134	Adi-6_r2_p	Adi-6	4736	BVZ0055	Wagga_Winter_present	Ch03	8A2	106.983	0.5393	1	1	1.1	1.2	1.3	1.4	1.6	1.7	1.8	1.9	2.1	2.2	2.3	2.3	2.3	2.3	2.5	3.1	3.2	3.5	3.7	4.3	0.047	0.067	120.44	510.304	0	0	0	0	0	0	0	2	2.5	3.6	6.9	0.88	0.42	0.01375
27164	Adi-6_r3_p	Adi-6	4736	BVZ0055	Wagga_Winter_present	Ch03	9C3	106.983	0.5393	1	1	1	1.2	1.2	1.4	1.5	1.6	1.7	1.8	2.1	2.2	2.3	2.5	2.6	2.8	2.9	3.1	3.3	3.6	3.9	4.4	0.048	0.064	116.79	494.84	0	0	0	0	0	0	0	1	2.5	4.3	9	0.85	0.49	0.01365
27225	Adi-6_r4_p	Adi-6	4736	BVZ0055	Wagga_Winter_present	Ch03	12D2	106.983	0.5393	1	1	1	1.3	1.4	1.5	1.7	1.8	1.9	1.9	2.1	2.1	2.3	2.5	2.6	2.7	3	3.1	3.3	3.6	3.9	4.4	0.045	0.064	116.79	494.84	0	0	0	0	0	0	0	0	2.5	4	9	0.88	0.46	0.02265
27081	Adi-8_r1_p	Adi-8	4737	BVZ0055	Wagga_Winter_present	Ch03	5A5	106.983	0.5157	1	1	1.3	1.5	1.5	1.6	1.7	1.8	2.1	2.2	2.4	2.6	2.7	2.9	3	3.2	3.4	3.7	3.9	4.1	4.3	5	0.056	0.076	98.8223	418.711	0	0	0	0	0	0	0	2	2	3.3	7.2	0.89	0.42	0.0242
27138	Adi-8_r2_p	Adi-8	4737	BVZ0055	Wagga_Winter_present	Ch03	8B1	106.983	0.5157	1	1.2	1.3	1.4	1.6	1.7	1.7	1.8	2.1	1.8	2.3	2.6	2.6	2.7	2.9	3.2	3.3	3.7	3.9	4.1	4.3	4.9	0.049	0.067	98.8223	418.711	0	0	0	0	0	0	1	3	2	3.5	7	0.89	0.46	0.0265
27241	Adi-8_r3_p	Adi-8	4737	BVZ0055	Wagga_Winter_present	Ch03	13C4	114.182	0.5157	1	1	1.4	1.5	1.6	1.7	1.8	1.9	1.9	2	2.1	2.2	2.3	2.5	2.6	2.7	3.1	3.5	3.7	3.9	4.1	4.8	0.038	0.076	102.218	434.372	0	0	0	0	0	0	1	2	2	3.6	7.2	0.86	0.43	0.0218
27274	Adi-8_r4_p	Adi-8	4737	BVZ0055	Wagga_Winter_present	Ch03	15B5	106.983	0.5157	1	1.3	1.4	1.6	1.6	1.7	1.8	1.9	2.1	2.1	2.3	2.5	2.5	2.6	2.7	3.1	3.2	3.5	3.7	3.9	4.1	4.9	0.043	0.085	104.164	441.344	0	0	1	1	1	2	2	2	2.25	3.6	6.6	0.89	0.51	0.0302
27091	Ban1_r1_p	Ban1	4174	BVZ0055	Wagga_Winter_present	Ch03	5C5	106.983	0.4365	1	1	1	1.1	1.2	1.3	1.5	1.5	1.6	1.7	2.1	2.3	2.3	2.5	2.7	2.8	3.1	3.1	3.3	3.6	3.9	4.4	0.05	0.064	116.79	494.84	0	0	1	1	1	1	2	2	2	3.7	5.6	0.89	0.39	0.0268
27041	Ban1_r2_p	Ban1	4174	BVZ0055	Wagga_Winter_present	Ch03	3A3	114.182	0.4365	1	1	1	1	1.2	1.3	1.4	1.5	1.6	1.7	2.1	2.3	2.4	2.6	2.6	2.8	3.1	3.3	3.5	3.8	4	4.4	0.052	0.049	108.059	459.193	0	0	0	1	1	2	2	2	2.5	3.3	4.9	0.88	0.34	0.02455
27243	Ban1_r3_p	Ban1	4174	BVZ0055	Wagga_Winter_present	Ch03	13D1	114.182	0.4365	1	1	1	1	1.1	1.2	1.3	1.4	1.5	1.6	1.7	2.1	2.1	2.3	2.4	2.5	2.7	3.1	3.2	3.4	3.6	4.3	0.041	0.076	118.19	502.243	0	0	0	1	1	1	1	2	2	3.4	5.2	0.89	0.4	0.0233
27287	Ban1_r4_p	Ban1	4174	BVZ0055	Wagga_Winter_present	Ch03	16A4	121.326	0.4365	1	1	1	1	1.1	1.2	1.3	1.4	1.5	1.6	2.1	2.1	2.2	2.3	2.5	2.6	2.8	2.9	3.2	3.5	3.6	4.3	0.047	0.069	115.957	494.266	0	0	0	1	1	1	1	2	1.75	3.3	5.3	0.87	0.37	0.03185
27103	BAR1020_r1_p	BAR1020	4739	BVZ0055	Wagga_Winter_present	Ch03	6B3	106.983	0.3498	1	1	1	1	1	1.1	1.2	1.2	1.3	1.4	1.6	1.8	1.8	2.1	2.2	2.3	2.5	2.7	2.9	3.1	3.3	3.9	0.031	0.067	132.899	563.094	0	0	0	0	1	1	1	2	2.5	4.7	6.7	0.86	0.39	0.01595
27057	BAR1020_r2_p	BAR1020	4739	BVZ0055	Wagga_Winter_present	Ch03	3D4	121.326	0.3498	1	1	1	1	1	1	1.1	1.2	1.2	1.3	1.5	1.6	1.7	2.1	2.2	2.2	2.3	2.6	2.8	3.1	3.1	3.8	0.026	0.063	132.523	564.875	0	0	0	0	0	1	1	2	2.5	4.3	5.7	0.88	0.39	0.022
27240	BAR1020_r3_p	BAR1020	4739	BVZ0055	Wagga_Winter_present	Ch03	13C3	128.418	0.3498	1	1	1	1	1	1	1.1	1.2	1.2	1.3	1.5	1.6	1.6	1.7	2.1	1.1	2.3	2.5	2.7	3.1	3.1	3.9	0.024	0.072	134.804	576.289	0	0	0	0	0	1	1	2	2.75	4	6.5	0.84	0.42	0.02015
27286	BAR1020_r4_p	BAR1020	4739	BVZ0055	Wagga_Winter_present	Ch03	16A3	114.182	0.3498	1	1	1	1	1	1.1	1.2	1.2	1.3	1.5	1.6	1.8	1.8	2.1	2.1	2.2	2.3	2.6	2.8	3.1	3.3	3.8	0.032	0.058	135.074	573.992	0	0	0	0	0	1	1	2	2.5	4.6	6.2	0.87	0.35	0.02325
27135	BD18-1_r2_p	BD18-1	4134	BVZ0055	Wagga_Winter_present	Ch03	8A3	106.983	0.39	1	1	1	1	1.1	1.2	1.3	1.4	1.5	1.6	2.1	2.2	2.3	2.5	2.6	2.8	2.9	3.1	3.3	3.6	3.8	4.3	0.05	0.058	116.79	494.84	0	0	0	0	0	0	0	2	1.5	2.7	5	0.88	0.44	0.0227
27168	BD18-1_r3_p	BD18-1	4134	BVZ0055	Wagga_Winter_present	Ch03	9D2	114.182	0.39	1	1	1	1	1	1.1	1.2	1.2	1.3	1.4	1.5	1.6	2.1	2.3	2.5	2.7	2.9	3	3	3.2	3.5	4.2	0.032	0.082	126.069	535.725	0	0	0	0	0	0	0	0	1.75	2.7	4.5	0.89	0.48	0.0158
27209	BD18-1_r4_p	BD18-1	4134	BVZ0055	Wagga_Winter_present	Ch03	12A1	114.182	0.39	1	1	1	1	1.1	1.2	1.3	1.4	1.4	1.5	1.7	2.1	2.2	2.4	2.5	2.7	2.9	3	3.1	3.5	3.7	4.2	0.042	0.058	122.003	518.444	0	0	0	0	0	0	0	1	1.75	2.5	4.6	0.89	0.45	0.02285
27084	BD21_r1_p	BD21	4741	BVZ0055	Wagga_Winter_present	Ch03	5B3	106.983	0.5562	1	1.1	1.2	1.3	1.4	1.5	1.7	1.8	2	2	2.1	2.3	2.3	2.5	2.7	3	3.1	3.2	3.5	3.8	4	4.6	0.045	0.067	110.116	466.564	0	0	0	0	0	1	0	2	2.5	3.5	6.6	0.83	0.43	0.02005
27068	BD21_r2_p	BD21	4741	BVZ0055	Wagga_Winter_present	Ch03	4C1	114.182	0.5562	1	1	1	1.2	1.2	1.3	1.5	1.6	1.7	1.8	2.1	2.2	2.2	2.3	2.4	2.6	2.8	3.1	3.3	3.7	3.9	4.3	0.047	0.049	114.608	487.023	0	0	0	0	1	1	1	2	3	3.5	8.1	0.89	0.41	0.0192
27181	BD21_r3_p	BD21	4741	BVZ0055	Wagga_Winter_present	Ch03	10C1	106.983	0.5562	1	1	1.1	1.2	1.2	1.3	1.4	1.5	1.6	1.6	2.1	2.2	2.2	2.3	2.5	2.6	2.8	3.1	3.3	3.6	3.8	4.3	0.044	0.058	116.79	494.84	0	0	0	0	0	0	2	2	2.5	3.2	6	0.89	0.45	0.01995
27195	BD21_r4_p	BD21	4741	BVZ0055	Wagga_Winter_present	Ch03	11B1	106.983	0.5562	1	1	1	1.2	1.2	1.3	1.5	1.5	1.6	1.7	2	2.1	2.1	2.3	2.4	2.5	2.6	3.1	3.1	3.4	3.6	4.3	0.042	0.076	124.325	526.765	0	0	0	0	0	0	1	1	2.75	3.2	5.7	0.89	0.45	0.02525
27022	BD21_r5_p	BD21	4741	BVZ0055	Wagga_Winter_present	Ch03	2A3	106.983	0.5562	1	1	1	1.1	1.2	1.2	1.3	1.5	1.5	1.7	2	2	2.1	2.2	2.3	2.5	2.7	3.1	3.2	3.5	3.7	4.2	0.042	0.058	120.44	510.304	0	0	0	0	0	0	1	2	3	3.4	7.3	0.87	0.4	0.0239
27186	BD21_r6_p	BD21	4741	BVZ0055	Wagga_Winter_present	Ch03	10D1	106.983	0.5562	1	1	1.2	1.3	1.3	1.4	1.5	1.6	1.7	1.8	2.1	2.1	2.1	2.2	2.4	2.4	2.6	3.1	3.1	3.4	3.6	4.2	0.04	0.067	124.325	526.765	0	0	0	1	1	1	2	2	2.5	3.3	6.7	0.89	0.46	0.0202
27095	Bd21-3_r1_p	Bd21-3	4148	BVZ0055	Wagga_Winter_present	Ch03	5D4	106.983	0.6178	1.4	1.5	1.6	1.7	1.8	1.9	1.9	2.1	2.2	2.3	2.5	2.7	2.7	3.1	3.2	3.4	3.5	4	4.1	4.3	4.5	5.5	0.044	0.103	94.0017	398.286	0	0	0	0	1	2	2	3	3	4.5	9.8	0.87	0.38	0.0125
27129	Bd21-3_r2_p	Bd21-3	4148	BVZ0055	Wagga_Winter_present	Ch03	7D1	106.983	0.6178	1.4	1.5	1.6	1.7	1.8	1.9	1.9	1.6	2.1	2.2	2.3	2.5	2.6	2.6	2.7	2.7	3.1	3.3	3.5	4.1	4.2	5	0.036	0.078	110.116	466.564	0	0	0	0	0	1	2	2	2.5	4.5	8.3	0.88	0.31	0.01985
27163	Bd21-3_r3_p	Bd21-3	4148	BVZ0055	Wagga_Winter_present	Ch03	9C2	145.978	0.6178	1	1	1	1	1.2	1.3	1.5	1.6	1.6	1.7	2	2	2.1	2.3	2.4	2.5	2.7	3.1	3.2	3.5	3.7	4.4	0.043	0.076	108.254	470.365	0	0	0	0	0	0	0	1	2.75	4.7	11	0.87	0.45	0.01855
27278	Bd21-3_r4_p	Bd21-3	4148	BVZ0055	Wagga_Winter_present	Ch03	15C4	106.983	0.6178	1	1.3	1.4	1.5	1.6	1.8	1.8	1.9	2.1	2.2	2.3	2.5	2.6	2.7	2.9	3.1	3.3	3.6	3.8	3.9	4.2	4.9	0.046	0.082	101.423	429.73	0	0	0	0	0	1	1	2	2.75	4.2	11.3	0.88	0.49	0.0373
27012	BD3-1_r1_p	BD3-1	4743	BVZ0055	Wagga_Winter_present	Ch03	1C2	106.983	0.5183	1	1.2	1.3	1.5	1.5	1.6	1.7	1.8	1.9	2.1	2.3	2.4	2.5	2.7	2.8	2.9	3.1	3.5	3.6	3.9	4.1	4.7	0.046	0.067	107.058	453.603	0	0	0	0	1	2	2	2	3	4.6	10.1	0.88	0.44	0.0196
27047	BD3-1_r2_p	BD3-1	4743	BVZ0055	Wagga_Winter_present	Ch03	3B4	106.983	0.5183	1	1	1.1	1.3	1.3	1.4	1.5	1.6	1.7	1.8	2.1	2.3	2.4	2.6	2.7	2.8	3.1	3.2	3.5	3.8	3.9	4.6	0.048	0.069	110.116	466.564	0	0	0	0	0	2	2	2	2.5	4	9.1	0.89	0.57	0.02315
27264	BD3-1_r3_p	BD3-1	4743	BVZ0055	Wagga_Winter_present	Ch03	14D3	106.983	0.5183	1	1.2	1.3	1.4	1.5	1.7	1.7	1.8	1.9	1.9	2.2	2.4	2.5	2.6	2.9	2.9	3.1	3.3	3.6	3.9	4.1	4.7	0.044	0.067	107.058	453.603	0	0	0	0	0	2	2	2	2.75	4.3	9.5	0.88	0.47	0.0216
27280	BD3-1_r4_p	BD3-1	4743	BVZ0055	Wagga_Winter_present	Ch03	15D1	106.983	0.5183	1	1.3	1.4	1.5	1.5	1.6	1.7	1.8	1.9	1.9	2.3	2.4	2.5	2.6	2.9	2.9	3.1	3.3	3.5	3.9	4.1	4.7	0.042	0.067	110.116	466.564	0	0	0	0	0	1	1	2	2.25	3.9	7.9	0.89	0.48	0.02795
27014	Bd30-1_r1_p	Bd30-1	4744	BVZ0055	Wagga_Winter_present	Ch03	1C4	106.983	0.3575	1	1	1	1.1	1.2	1.3	1.3	1.3	1.4	1.5	1.7	1.7	2.1	2.3	2.5	2.6	2.7	2.9	3.1	3.3	3.5	4.1	0.033	0.067	124.325	526.765	0	0	0	0	0	0	1	2	2	3.4	4.4	0.87	0.49	0.02035
27054	Bd30-1_r2_p	Bd30-1	4744	BVZ0055	Wagga_Winter_present	Ch03	3D1	106.983	0.3575	1	1	1	1	1.1	1.2	1.3	1.3	1.4	1.5	1.6	1.7	2.1	2.2	2.3	2.4	2.5	2.7	3.1	3.2	3.4	4	0.034	0.067	124.325	526.765	0	0	0	0	0	1	1	2	2	3	3.9	0.89	0.45	0.0228
27170	Bd30-1_r3_p	Bd30-1	4744	BVZ0055	Wagga_Winter_present	Ch03	9D4	106.983	0.3575	1	1	1	1	1	1	1.1	1	1.1	1.2	1.4	1.5	1.5	1.5	1.5	1.6	1.6	2.1	2.3	2.5	2.6	3.6	0.019	0.096	167.568	709.988	0	0	0	0	0	0	0	0	.	.	2.9	0.86	0.33	0.01515
27267	Bd30-1_r4_p	Bd30-1	4744	BVZ0055	Wagga_Winter_present	Ch03	15A3	106.983	0.3575	1	1	1	1	1	1.1	1.2	1.2	1.3	1.4	1.5	1.7	1.7	2.1	2.2	2.2	2.3	2.5	2.6	3.1	3.2	3.8	0.027	0.06	148.233	628.066	0	0	0	0	0	0	0	1	1.5	2.4	3.4	0.87	0.43	0.021
27102	Bdis05-7_r1_p	Bdis05-7	4747	BVZ0055	Wagga_Winter_present	Ch03	6B2	114.182	0.3587	1	1	1	1	1	1.1	1.2	1.2	1.3	1.4	1.6	1.7	2.1	2.2	2.3	2.4	2.6	2.8	3.1	3.3	3.6	4.1	0.034	0.064	122.003	518.444	0	0	0	0	1	1	1	2	2	3.1	4.8	0.88	0.45	0.01825
27131	Bdis05-7_r2_p	Bdis05-7	4747	BVZ0055	Wagga_Winter_present	Ch03	7D3	106.983	0.3587	1	1	1	1.1	1.2	1.4	1.5	1.6	1.7	1.7	2.2	2.3	2.4	2.6	2.6	3.1	3.2	3.5	3.7	3.9	4.1	4.7	0.052	0.067	104.164	441.344	0	0	0	1	1	2	2	2	2	3.3	5.3	0.86	0.4	0.0171
27167	Bdis05-7_r3_p	Bdis05-7	4747	BVZ0055	Wagga_Winter_present	Ch03	9D1	114.182	0.3587	1	1	1	1	1	1.7	1.2	1.2	1.3	1.4	1.4	1.5	2.1	2.2	2.3	2.4	2.6	2.8	3.1	3.3	3.5	4.2	0.027	0.076	122.003	518.444	0	0	0	0	0	0	0	1	2	2.5	4.4	0.88	0.5	0.0193
27302	Bdis05-7_r4_p	Bdis05-7	4747	BVZ0055	Wagga_Winter_present	Ch03	16D4	114.182	0.3587	1	1	1	1	1	1.3	1.4	1.5	1.5	1.6	1.7	1.8	2.1	2.1	2.3	2.4	2.5	2.7	3.1	3.4	3.6	4.3	0.038	0.076	122.003	518.444	0	0	0	0	0	0	0	1	1.75	2.4	3.9	0.88	0.46	0.02835
27108	Bdis05-9_r1_p	Bdis05-9	4748	BVZ0055	Wagga_Winter_present	Ch03	6C3	114.182	0.2808	1	1	1	1	1	1.1	1.2	1.3	1.4	1.5	1.7	1.8	1.9	2.1	2.3	2.5	2.6	2.8	3.1	3.3	3.4	4.1	0.035	0.069	122.003	518.444	0	0	0	0	0	1	1	2	2.5	3.5	5.5	0.85	0.42	0.0155
27141	Bdis05-9_r2_p	Bdis05-9	4748	BVZ0055	Wagga_Winter_present	Ch03	8B4	114.182	0.2808	1	1	1	1	1	1.1	1.1	1.2	1.2	1.3	1.5	1.6	1.7	2.1	2.3	2.3	2.5	2.7	2.8	3.2	3.3	3.9	0.025	0.06	135.074	573.992	0	0	0	0	0	0	0	2	2.5	3.4	4.9	0.88	0.45	0.02565
27237	Bdis05-9_r3_p	Bdis05-9	4748	BVZ0055	Wagga_Winter_present	Ch03	13B5	145.978	0.2808	1	1	1	1	1	1.2	1.3	1.4	1.5	1.6	1.8	1.8	1.9	2.1	2.2	2.3	2.5	2.8	3.1	3.2	3.5	4.1	0.036	0.073	111.746	485.538	0	0	0	0	0	0	1	2	1.75	2.6	3.8	0.89	0.43	0.02365
27020	Bdis22-1_r1_p	Bdis22-1	4749	BVZ0055	Wagga_Winter_present	Ch03	2A1	106.983	0.308	1	1	1	1	1.1	1.2	1.3	1.3	1.4	1.5	2.1	2.2	2.3	2.6	2.6	2.8	3.1	3.4	3.6	3.8	4.1	4.6	0.049	0.064	107.058	453.603	0	0	1	1	1	1	2	2	1.5	2.6	3.9	0.89	0.47	0.0216
27045	Bdis22-1_r2_p	Bdis22-1	4749	BVZ0055	Wagga_Winter_present	Ch03	3B2	106.983	0.308	1	1	1	1.1	1.2	1.3	1.3	1.4	1.5	1.6	2.2	2.3	2.4	2.7	2.8	2.9	3.1	3.5	3.7	3.7	4.1	4.7	0.052	0.079	104.164	441.344	0	0	1	1	1	2	2	2	1.5	2.9	4.5	0.88	0.41	0.02515
27171	Bdis22-1_r3_p	Bdis22-1	4749	BVZ0055	Wagga_Winter_present	Ch03	10A1	106.983	0.308	1	1	1	1	1.1	1.2	1.3	1.4	1.5	1.6	2.1	2.2	2.3	2.5	2.6	2.8	2.9	3.2	3.5	3.7	3.9	4.7	0.05	0.085	110.116	466.564	0	0	0	0	0	0	0	1	1.5	2.5	3.8	0.88	0.36	0.02485
27277	Bdis22-1_r4_p	Bdis22-1	4749	BVZ0055	Wagga_Winter_present	Ch03	15C3	106.983	0.308	1	1	1	1.1	1.2	1.3	1.4	1.4	1.5	1.6	1.7	1.7	2.4	2.5	2.6	2.8	3.1	3.4	3.5	3.8	4.1	4.6	0.038	0.064	110.116	466.564	0	0	1	0	0	1	2	2	1.75	2.6	3.7	0.83	0.42	0.02945
27030	Bdis22-5_r1_p	Bdis22-5	4750	BVZ0055	Wagga_Winter_present	Ch03	2C1	114.182	0.3751	1	1	1	1.1	1.2	1.3	1.4	1.4	1.5	1.5	2.1	2.3	2.4	2.5	2.7	2.8	3.1	3.3	3.5	3.8	3.9	4.5	0.05	0.06	108.059	459.193	0	0	1	1	1	1	2	2	2.5	2.9	3.9	0.89	0.45	0.0183
27044	Bdis22-5_r2_p	Bdis22-5	4750	BVZ0055	Wagga_Winter_present	Ch03	3B1	106.983	0.3751	1	1	1	1.2	1.2	1.3	1.4	1.5	1.6	1.7	2.1	2.2	2.3	2.5	2.6	2.7	3.1	3.2	3.5	3.7	3.9	4.4	0.048	0.058	110.116	466.564	0	0	1	1	1	1	2	2	2	2.9	3.9	0.9	0.45	0.0179
27162	Bdis22-5_r3_p	Bdis22-5	4750	BVZ0055	Wagga_Winter_present	Ch03	9C1	106.983	0.3751	1	1	1	1.1	1.2	1.3	1.3	1.4	1.5	1.5	2.1	2.2	2.3	2.5	2.6	2.8	2.9	3.2	3.4	3.6	3.8	4.5	0.047	0.076	113.355	480.286	0	0	0	1	1	1	1	2	2.25	2.7	4.3	0.84	0.42	0.01615
27271	Bdis22-5_r4_p	Bdis22-5	4750	BVZ0055	Wagga_Winter_present	Ch03	15B2	114.182	0.3751	1	1	1	1	1.1	1.2	1.3	1.4	1.5	1.5	1.7	2.1	2.2	2.3	2.5	2.6	2.7	3.1	3.2	3.5	3.6	4.4	0.042	0.078	118.19	502.243	0	0	0	0	1	1	1	2	2.25	2.8	4	0.87	0.42	0.0249
27093	Bdis22-6_r1_p	Bdis22-6	4751	BVZ0055	Wagga_Winter_present	Ch03	5D2	106.983	0.3649	1	1	1.1	1.2	1.2	1.3	1.4	1.5	1.6	1.7	2.2	2.3	2.5	2.6	2.8	2.8	3.1	3.3	3.5	3.7	3.9	4.6	0.052	0.076	110.116	466.564	0	0	1	1	1	2	2	2	1.5	3.2	4.2	0.89	0.4	0.02165
27069	Bdis22-6_r2_p	Bdis22-6	4751	BVZ0055	Wagga_Winter_present	Ch03	4C2	114.182	0.3649	1	1	1	1.1	1.2	1.3	1.4	1.4	1.5	1.7	2.1	2.2	2.2	2.3	2.5	2.7	2.8	3.1	3.2	3.5	3.7	4.2	0.047	0.058	118.19	502.243	0	0	0	1	1	1	1	2	2	3.8	5.1	0.88	0.43	0.02535
27177	Bdis22-6_r3_p	Bdis22-6	4751	BVZ0055	Wagga_Winter_present	Ch03	10B2	106.983	0.3649	1	1	1	1	1.1	1.2	1.3	1.4	1.4	1.5	2.1	2.2	2.2	2.4	2.6	2.7	2.8	3.1	3.2	3.4	3.5	4.4	0.047	0.087	120.44	510.304	0	0	0	1	1	1	1	2	1.75	3.1	4.5	0.88	0.44	0.02425
27266	Bdis22-6_r4_p	Bdis22-6	4751	BVZ0055	Wagga_Winter_present	Ch03	15A2	114.182	0.3649	1	1	1	1.1	1.1	1.3	1.4	1.5	1.5	1.6	2.1	2.2	2.3	2.5	2.4	2.8	2.9	3.2	3.4	3.7	3.8	4.5	0.048	0.069	111.238	472.699	0	0	0	1	1	1	2	2	2	2.8	3.7	0.88	0.43	0.02955
27097	Bdis23-1_r1_p	Bdis23-1	4753	BVZ0055	Wagga_Winter_present	Ch03	6A2	106.983	0.3943	1	1	1	1.2	1.2	1.3	1.4	1.5	1.6	1.6	2.1	2.3	2.4	2.6	2.7	2.8	3.1	3.2	3.4	3.6	3.8	4.4	0.05	0.067	113.355	480.286	0	0	0	1	1	1	1	2	2	3.7	5	0.88	0.42	0.02105
27140	Bdis23-1_r2_p	Bdis23-1	4753	BVZ0055	Wagga_Winter_present	Ch03	8B3	106.983	0.3943	1	1	1	1.1	1.2	1.2	1.3	1.4	1.5	1.6	2.1	2.1	2.2	2.3	2.5	2.7	2.8	3.1	3.2	3.5	3.7	4.2	0.045	0.058	120.44	510.304	0	0	0	0	1	1	1	2	2	3.8	5	0.85	0.4	0.02245
27242	Bdis23-1_r3_p	Bdis23-1	4753	BVZ0055	Wagga_Winter_present	Ch03	13C5	106.983	0.3943	1	1	1	1.1	1.2	1.3	1.3	1.4	1.5	1.6	2.1	2.2	2.3	2.4	2.5	2.7	3.1	3.2	3.5	3.7	3.9	4.4	0.048	0.058	110.116	466.564	0	0	0	1	1	1	2	2	2	3.3	4.5	0.84	0.44	0.02175
27199	Bdis23-1_r4_p	Bdis23-1	4753	BVZ0055	Wagga_Winter_present	Ch03	11B5	106.983	0.3943	1	1	1	1.1	1.1	1.2	1.3	1.4	1.5	1.5	2.1	2.2	2.3	2.4	2.5	2.7	2.9	3.1	3.2	3.5	3.7	4.4	0.048	0.076	120.44	510.304	0	0	0	1	0	1	2	2	2	3.5	4.8	0.89	0.5	0.0284
27035	Bdis23-2_r1_p	Bdis23-2	4754	BVZ0055	Wagga_Winter_present	Ch03	2D1	106.983	0.3709	1	1	1	1	1.1	1.1	1.2	1.3	1.4	1.4	2.1	2.2	2.3	2.4	2.6	2.7	2.8	3.2	3.4	3.6	3.8	4.4	0.049	0.067	113.355	480.286	0	0	1	1	1	1	2	2	2	3.2	4.6	0.89	0.41	0.0198
27137	Bdis23-2_r2_p	Bdis23-2	4754	BVZ0055	Wagga_Winter_present	Ch03	8A5	114.182	0.3709	1	1	1	1	1.1	1.2	1.4	1.5	1.5	1.6	2.1	2.2	2.3	2.4	2.5	2.7	3.1	3.3	3.5	3.8	4.1	4.6	0.05	0.064	108.059	459.193	0	1	1	1	1	1	2	2	2	2.8	3.6	0.89	0.48	0.02565
27257	Bdis23-2_r3_p	Bdis23-2	4754	BVZ0055	Wagga_Winter_present	Ch03	14C1	114.182	0.3709	1	1	1	1	1	1.1	1.1	1.2	1.2	1.3	1.5	1.5	1.6	2.1	2.2	2.3	2.5	2.8	3.1	3.3	3.5	4.2	0.023	0.076	122.003	518.444	0	0	0	0	1	1	1	2	2	3.2	3.9	0.89	0.44	0.0281
27206	Bdis23-2_r4_p	Bdis23-2	4754	BVZ0055	Wagga_Winter_present	Ch03	11D2	114.182	0.3709	1	1	1	1	1	1	1.1	1.1	1.2	1.3	1.5	1.6	1.6	2.1	2.2	2.2	2.4	2.7	2.7	3.1	3.4	4.1	0.024	0.082	140.077	595.251	0	0	0	0	1	1	1	2	2.25	2.7	3.7	0.88	0.47	0.02755
27101	Bdis23-5_r1_p	Bdis23-5	4755	BVZ0055	Wagga_Winter_present	Ch03	6B1	106.983	0.3506	1	1	1	1.1	1.2	1.2	1.3	1.3	1.4	1.4	2.1	2.3	2.3	2.5	2.5	2.7	3.2	3.5	3.7	3.9	4.2	4.7	0.048	0.064	104.164	441.344	0	1	1	1	1	1	2	2	2	2.5	3.4	0.89	0.45	0.0193
27076	Bdis23-5_r2_p	Bdis23-5	4755	BVZ0055	Wagga_Winter_present	Ch03	4D4	114.182	0.3506	1	1	1	1.1	1.2	1.3	1.3	1.4	1.5	1.6	2.1	2.2	2.3	2.5	2.6	2.8	3.1	3.3	3.5	3.8	3.9	4.5	0.048	0.06	108.059	459.193	0	0	0	1	1	1	1	2	1.5	2.7	3.6	0.89	0.44	0.02275
27235	Bdis23-5_r3_p	Bdis23-5	4755	BVZ0055	Wagga_Winter_present	Ch03	13B3	114.182	0.3506	1	1	1	1	1	1.1	1.2	1.2	1.3	1.4	1.5	1.5	2.1	2.3	2.4	2.6	2.8	3.1	3.3	3.6	3.8	4.4	0.031	0.067	114.608	487.023	0	0	0	1	1	1	1	2	1.75	2.8	4	0.88	0.44	0.03245
27208	Bdis23-5_r4_p	Bdis23-5	4755	BVZ0055	Wagga_Winter_present	Ch03	11D4	106.983	0.3506	1	1	1	1	1.1	1.1	1.2	1.3	1.3	1.4	1.6	2.1	2.2	2.4	2.6	2.7	2.8	3.2	3.5	3.7	3.9	4.5	0.04	0.067	110.116	466.564	0	0	0	1	1	1	2	2	2	2.5	3.3	0.88	0.49	0.0221
27008	Bdis25-04_r1_p	Bdis25-04	4757	BVZ0055	Wagga_Winter_present	Ch03	1B3	106.983	0.4311	1	1.1	1.1	1.2	1.3	1.4	1.6	1.7	1.7	1.8	2.3	2.4	2.6	2.7	2.9	3.1	3.2	3.4	3.6	3.8	4.1	4.5	0.054	0.055	107.058	453.603	1	1	1	1	1	2	2	2	2	3.4	4.9	0.87	0.39	0.01865
27124	Bdis25-04_r2_p	Bdis25-04	4757	BVZ0055	Wagga_Winter_present	Ch03	7C1	106.983	0.4311	1	1	1.1	1.2	1.3	1.4	1.5	1.6	1.7	1.8	2.2	2.3	2.4	2.6	2.8	2.8	3.1	3.3	3.5	3.7	3.9	4.4	0.05	0.058	110.116	466.564	0	0	0	1	1	2	2	2	2	3.8	5	0.9	0.4	0.0195
27184	Bdis25-04_r3_p	Bdis25-04	4757	BVZ0055	Wagga_Winter_present	Ch03	10C4	106.983	0.4311	1	1	1	1	1.3	1.4	1.5	1.6	1.7	1.8	2.2	2.3	2.4	2.5	2.7	2.8	3.1	3.3	3.5	3.8	4	4.5	0.053	0.058	110.116	466.564	0	0	1	1	1	2	2	2	2	3.3	4.7	0.84	0.42	0.02325
27281	Bdis25-04_r4_p	Bdis25-04	4757	BVZ0055	Wagga_Winter_present	Ch03	15D2	106.983	0.4311	1	1	1.1	1.3	1.3	1.5	1.6	1.7	1.7	1.8	2.3	2.3	2.5	2.6	2.6	2.8	3.1	3.4	3.6	3.8	4.1	4.6	0.051	0.064	107.058	453.603	0	1	1	1	1	2	2	2	2.25	3.7	4.9	0.89	0.42	0.02725
27034	Bdis25-1_r1_p	Bdis25-1	4756	BVZ0055	Wagga_Winter_present	Ch03	2C5	106.983	0.4079	1	1	1.1	1.2	1.3	1.4	1.5	1.6	1.7	1.7	2.2	2.4	2.5	2.6	2.7	2.7	3.2	3.6	3.7	4.1	4.2	4.8	0.052	0.06	104.164	441.344	0	0	1	1	1	2	2	3	2.5	3.4	4	0.89	0.43	0.0257
27148	Bdis25-1_r2_p	Bdis25-1	4756	BVZ0055	Wagga_Winter_present	Ch03	8D1	106.983	0.4079	1	1	1	1.2	1.2	1.4	1.5	1.6	1.6	1.7	2.2	2.3	2.5	2.6	2.6	3.1	3.2	3.6	3.7	3.8	4.2	4.9	0.052	0.088	104.164	441.344	0	0	1	1	1	2	2	2	2	2.8	3.9	0.9	0.42	0.01725
27265	Bdis25-1_r3_p	Bdis25-1	4756	BVZ0055	Wagga_Winter_present	Ch03	14D4	106.983	0.4079	1	1	1	1.1	1.2	1.3	1.4	1.5	1.6	1.7	2.2	2.3	2.4	2.5	2.6	2.7	3.2	3.5	3.6	3.8	4.2	4.9	0.052	0.088	107.058	453.603	0	0	0	1	1	1	2	2	2	2.9	3	0.89	0.36	0.03325
27282	Bdis25-1_r4_p	Bdis25-1	4756	BVZ0055	Wagga_Winter_present	Ch03	15D3	106.983	0.4079	1	1	1	1	1.1	1.2	1.2	1.4	1.5	1.5	2.1	2.2	2.3	2.5	2.6	2.7	3.1	3.3	3.5	3.7	4.1	4.6	0.049	0.071	110.116	466.564	0	0	0	1	1	1	2	2	2.25	2.9	4	0.88	0.41	0.03375
27033	Bdis25-10_r1_p	Bdis25-10	4760	BVZ0055	Wagga_Winter_present	Ch03	2C4	106.983	0.4376	1	1	1	1	1.1	1.1	1.2	1.3	1.3	1.4	1.6	1.7	2.1	2.3	2.4	2.5	2.7	2.9	3.1	3.4	3.5	4.1	0.034	0.06	124.325	526.765	0	0	0	0	0	1	1	2	2	3.8	5.9	0.84	0.45	0.02365
27070	Bdis25-10_r2_p	Bdis25-10	4760	BVZ0055	Wagga_Winter_present	Ch03	4C3	114.182	0.4376	1	1	1	1	1.2	1.2	1.3	1.4	1.5	1.6	1.7	2.2	2.2	2.3	2.6	2.6	2.8	3.1	3.2	3.5	3.6	4.1	0.043	0.051	118.19	502.243	0	0	0	1	1	1	1	2	2	4.3	6.7	0.86	0.4	0.02125
27234	Bdis25-10_r3_p	Bdis25-10	4760	BVZ0055	Wagga_Winter_present	Ch03	13B2	114.182	0.4376	1	1	1	1	1.1	1.1	1.2	1.3	1.3	1.4	1.6	1.6	2.1	2.2	2.4	2.5	2.6	2.8	3.1	3.3	3.5	4.2	0.032	0.076	122.003	518.444	0	0	0	0	0	1	1	2	2	4	6.1	0.88	0.41	0.03135
27292	Bdis25-10_r4_p	Bdis25-10	4760	BVZ0055	Wagga_Winter_present	Ch03	16B4	128.418	0.4376	1	1	1	1	1	1	1.1	1.2	1.2	1.3	1.4	1.5	1.5	2.1	2.2	2.2	2.3	2.6	2.7	3.1	3.2	3.8	0.02	0.06	134.804	576.289	0	0	0	0	0	0	1	2	2	3.8	4.3	0.86	0.51	0.01875
27078	Bdis25-5_r1_p	Bdis25-5	4758	BVZ0055	Wagga_Winter_present	Ch03	5A2	114.182	0.4904	1	1	1.2	1.2	1.2	1.2	1.2	1.2	1.2	1.3	1.5	1.6	2.1	2.1	2.2	2.3	2.5	2.8	2.9	3.1	3.3	3.9	0.025	0.067	130.416	554.199	0	0	1	1	1	2	2	3	2	3	4.5	0.88	0.38	0.0215
27061	Bdis25-5_r2_p	Bdis25-5	4758	BVZ0055	Wagga_Winter_present	Ch03	4A4	114.182	0.4904	1	1	1	1.1	1.3	1.4	1.6	1.7	1.8	1.8	2.2	2.4	2.5	2.7	2.9	2.9	3.1	3.3	3.5	3.8	3.9	4.4	0.055	0.051	108.059	459.193	0	0	0	1	1	1	2	2	2	3.9	5.9	0.89	0.41	0.02435
27261	Bdis25-5_r3_p	Bdis25-5	4758	BVZ0055	Wagga_Winter_present	Ch03	14C5	106.983	0.4904	1	1	1	1.2	1.2	1.4	1.5	1.6	1.7	1.8	2.1	2.3	2.4	2.6	2.7	2.8	3.1	3.3	3.5	3.7	3.9	4.5	0.051	0.067	110.116	466.564	0	0	1	1	1	1	2	0	2	3.8	5.5	0.89	0.4	0.03105
27222	Bdis25-5_r4_p	Bdis25-5	4758	BVZ0055	Wagga_Winter_present	Ch03	12C4	114.182	0.4904	1	1	1	1.2	1.3	1.4	1.6	1.7	1.8	1.8	2.2	2.4	2.4	2.6	2.7	2.8	2.9	3.2	3.3	3.6	3.8	4.4	0.053	0.067	114.608	487.023	0	0	0	0	0	1	1	2	1.75	3.8	5	0.88	0.47	0.0295
27021	Bdis28-8_r1_p	Bdis28-8	4762	BVZ0055	Wagga_Winter_present	Ch03	2A2	114.182	0.3895	1	1	1	1.1	1.2	1.3	1.4	1.4	1.6	1.6	2.1	2.4	2.5	2.7	2.8	2.8	3.1	3.3	3.6	3.8	4.1	4.6	0.053	0.064	105.058	446.438	0	1	1	1	1	1	2	2	2.5	3.5	3.6	0.88	0.41	0.02125
27132	Bdis28-8_r2_p	Bdis28-8	4762	BVZ0055	Wagga_Winter_present	Ch03	7D4	114.182	0.3895	1	1	1	1	1.1	1.2	1.3	1.4	1.5	1.6	2.1	2.1	2.2	2.4	2.5	2.7	2.9	3.1	3.4	3.6	3.8	4.4	0.047	0.067	111.238	472.699	0	0	0	1	1	1	2	2	2	3.3	5.3	0.88	0.44	0.01835
27229	Bdis28-8_r3_p	Bdis28-8	4762	BVZ0055	Wagga_Winter_present	Ch03	13A2	106.983	0.3895	1	1	1	1	1.1	1.2	1.3	1.4	1.5	1.6	2.2	2.3	2.5	2.7	2.9	2.9	3.1	3.4	3.6	3.9	4.1	4.7	0.055	0.067	107.058	453.603	0	0	1	1	1	1	2	2	2	3.3	4.8	0.87	0.43	0.03065
27212	Bdis28-8_r4_p	Bdis28-8	4762	BVZ0055	Wagga_Winter_present	Ch03	12A4	114.182	0.3895	1	1	1	1	1.1	1.2	1.3	1.4	1.5	1.6	2.1	2.2	2.3	2.5	2.7	2.8	3.1	3.2	3.5	3.8	3.9	4.6	0.05	0.069	108.059	459.193	0	0	1	1	1	1	2	2	2	3.1	4.5	0.86	0.39	0.0294
27031	Bdis31-1_r1_p	Bdis31-1	4763	BVZ0055	Wagga_Winter_present	Ch03	2C2	114.182	0.4177	1	1	1	1	1	1.1	1.2	1.2	1.3	1.4	1.5	1.6	2.1	2.2	2.4	2.5	2.6	2.8	3.1	3.2	3.4	3.9	0.032	0.058	122.003	518.444	0	0	0	1	1	1	1	2	2.5	4.6	5.9	0.88	0.36	0.0214
27144	Bdis31-1_r2_p	Bdis31-1	4763	BVZ0055	Wagga_Winter_present	Ch03	8C2	106.983	0.4177	1	1	1	1	1.1	1.2	1.3	1.4	1.5	1.6	1.7	2.1	2.3	2.4	2.4	2.6	2.8	3.2	3.3	3.6	3.8	4.3	0.044	0.058	116.79	494.84	0	0	1	1	1	1	1	2	2.5	4.1	6	0.84	0.36	0.016
27198	Bdis31-1_r4_p	Bdis31-1	4763	BVZ0055	Wagga_Winter_present	Ch03	11B4	114.182	0.4177	1	1	1	1	1	1.1	1.1	1.2	1.3	1.4	1.5	1.6	1.6	2.1	2.3	2.4	2.5	2.7	3.1	3.2	3.4	3.9	0.025	0.058	122.003	518.444	0	0	0	1	0	1	1	2	2.5	4	5.3	0.83	0.42	0.02185
27002	Bdis31-2_r1_p	Bdis31-2	4764	BVZ0055	Wagga_Winter_present	Ch03	1A2	114.182	0.2965	1	1	1	1	1	1.1	1.2	1.2	1.2	1.3	1.4	1.6	1.6	2.2	2.3	2.3	2.5	2.7	2.9	3.2	3.4	3.9	0.023	0.058	130.416	554.199	0	0	0	1	1	1	1	2	2.5	3.6	.	0.89	0.41	0.01335
27139	Bdis31-2_r2_p	Bdis31-2	4764	BVZ0055	Wagga_Winter_present	Ch03	8B2	106.983	0.2965	1	1	1	1	1	1.1	1.1	1.2	1.3	1.4	1.6	1.7	1.7	2.1	2.2	2.2	2.4	2.6	2.8	3.1	3.3	3.8	0.029	0.058	137.645	583.204	0	0	0	0	1	1	1	2	2.5	4	4.5	0.89	0.47	0.0222
27176	Bdis31-2_r3_p	Bdis31-2	4764	BVZ0055	Wagga_Winter_present	Ch03	10B1	114.182	0.2965	1	1	1	1	1	1	1	1.1	1.1	1.2	1.3	1.4	1.5	1.5	2.1	2.1	2.2	2.5	2.7	2.8	3.1	3.7	0.017	0.073	140.077	595.251	0	0	0	0	1	1	1	1	2.5	3.4	4.3	0.89	0.46	0.01755
27299	Bdis31-2_r4_p	Bdis31-2	4764	BVZ0055	Wagga_Winter_present	Ch03	16D1	106.983	0.2965	1	1	1	1	1	1	1	1	1.1	1.2	1.3	1.4	1.4	2.1	2.1	2.2	2.3	2.6	2.7	3.1	3.2	4.1	0.016	0.087	142.743	604.805	0	0	0	0	1	1	1	2	2.75	3.1	4.5	0.89	0.45	0.02265
27026	Bdis32-2_r1_p	Bdis32-2	4765	BVZ0055	Wagga_Winter_present	Ch03	2B2	114.182	0.2848	1	1	1	1	1.1	1.1	1.2	1.3	1.4	1.5	2.1	1.7	2.1	2.2	2.4	2.5	2.7	2.8	3.1	3.4	3.5	4.1	0.04	0.06	122.003	518.444	0	0	0	1	1	1	2	2	2.5	3.4	5.1	0.88	0.42	0.02155
27059	Bdis32-2_r2_p	Bdis32-2	4765	BVZ0055	Wagga_Winter_present	Ch03	4A2	114.182	0.2848	1	1	1	1	1	1.1	1.1	1.2	1.3	1.3	1.5	1.6	1.7	2.1	2.2	2.3	2.5	2.8	2.9	3.1	3.2	4.9	0.026	0.159	130.416	554.199	0	0	0	0	1	1	1	2	2	3	4	0.89	0.41	0.02585
27182	Bdis32-2_r3_p	Bdis32-2	4765	BVZ0055	Wagga_Winter_present	Ch03	10C2	114.182	0.2848	1	1	1	1	1	1	1.1	1.1	1.1	1.2	1.3	1.5	1.5	2.1	2.2	2.2	2.4	2.7	2.8	3.1	3.2	3.8	0.018	0.06	135.074	573.992	0	0	0	0	0	1	0	1	1.75	2.2	2.9	0.84	0.42	0.01545
27205	Bdis32-2_r4_p	Bdis32-2	4765	BVZ0055	Wagga_Winter_present	Ch03	11D1	114.182	0.2848	1	1	1	1	1	1.1	1.1	1.2	1.2	1.3	1.4	1.4	2.1	2.2	2.3	2.4	2.6	2.8	3.1	3.2	3.4	4.2	0.028	0.085	122.003	518.444	0	0	0	0	1	1	1	2	2	2.3	3.7	0.89	0.46	0.0203
27024	BdTR10c_r1_p	BdTR10c	4766	BVZ0055	Wagga_Winter_present	Ch03	2A5	106.983	0.5631	1.3	1.5	1.6	.	1.8	1.9	1.9	1.9	2.1	2.2	2.4	2.5	2.7	2.8	3.1	3.2	3.3	3.6	3.8	4.1	4.2	4.9	0.039	0.069	101.423	429.73	0	0	0	1	1	2	2	2	2.5	4	7.3	0.89	0.42	0.0149
27074	BdTR10c_r2_p	BdTR10c	4766	BVZ0055	Wagga_Winter_present	Ch03	4D2	106.983	0.5631	1.2	1.4	1.5	1.6	1.7	1.9	1.9	1.9	2.1	2.2	2.3	2.5	2.6	2.8	2.9	3	3.2	3.5	3.7	3.9	4.1	4.6	0.041	0.058	104.164	441.344	0	0	0	0	0	0	1	2	2.5	4.3	8.8	0.89	0.43	0.0175
27178	BdTR10c_r3_p	BdTR10c	4766	BVZ0055	Wagga_Winter_present	Ch03	10B3	106.983	0.5631	1	1.4	1.5	1.6	1.8	1.9	1.9	1.9	2.1	2.1	2.3	2.5	2.5	2.6	2.7	2.8	3.1	3.4	3.5	3.7	3.9	4.6	0.038	0.076	110.116	466.564	0	0	0	0	1	1	2	2	2.25	3.6	6.2	0.87	0.44	0.0227
27291	BdTR10c_r4_p	BdTR10c	4766	BVZ0055	Wagga_Winter_present	Ch03	16B3	106.983	0.5631	1	1	1.5	1.6	1.7	1.8	1.9	1.9	2	2.1	2.3	2.4	2.5	2.6	2.7	3	3.1	3.3	3.5	3.8	3.9	4.5	0.043	0.06	110.116	466.564	0	0	0	1	1	1	2	2	2.25	4	7.6	0.87	0.46	0.0216
27016	BdTR10f_r1_p	BdTR10f	4769	BVZ0055	Wagga_Winter_present	Ch03	1D1	106.983	0.5303	1.2	1.4	1.5	1.6	1.8	1.9	1.9	1.9	2.1	2.2	2.4	2.6	2.6	2.8	3.1	3.1	3.3	3.5	3.8	4.1	4.2	4.9	0.042	0.069	101.423	429.73	0	0	1	1	1	2	2	2	2.5	3.9	7.5	0.89	0.44	0.0146
27072	BdTR10f_r2_p	BdTR10f	4769	BVZ0055	Wagga_Winter_present	Ch03	4C5	106.983	0.5303	1	1.4	1.6	1.7	1.8	1.9	1.9	1.9	2.1	2.2	2.3	2.6	2.7	2.9	2.9	3.1	3.2	3.5	3.7	3.9	4.1	4.8	0.041	0.076	104.164	441.344	0	0	0	0	0	1	1	3	2	4.1	7.7	0.9	0.45	0.01965
27258	BdTR10f_r3_p	BdTR10f	4769	BVZ0055	Wagga_Winter_present	Ch03	14C2	106.983	0.5303	1	1.4	1.5	1.6	1.6	1.8	1.8	1.9	1.9	1.9	2.2	2.3	2.4	2.6	2.7	2.8	2.9	3.2	3.5	3.7	3.9	4.6	0.033	0.076	110.116	466.564	0	0	0	0	1	1	1	2	2.25	4.1	7.7	0.89	0.45	0.0244
27219	BdTR10f_r4_p	BdTR10f	4769	BVZ0055	Wagga_Winter_present	Ch03	12C1	106.983	0.5303	1	1.5	1.6	1.7	1.8	1.9	1.9	1.9	2.1	2.2	2.3	2.5	2.6	2.7	2.8	3.1	3.2	3.4	3.6	3.9	4.1	4.8	0.037	0.076	107.058	453.603	0	0	0	0	0	2	2	3	2.5	4	6.8	0.89	0.47	0.0238
27105	BdTR10i_r1_p	BdTR10i	4771	BVZ0055	Wagga_Winter_present	Ch03	6B5	106.983	0.5272	1.3	1.4	1.5	1.7	1.7	1.9	1.9	1.9	2.1	2.2	2.4	2.5	2.6	2.8	3	3.1	3.2	3.6	3.8	4.1	4.2	4.9	0.041	0.069	101.423	429.73	0	0	0	1	2	2	2	2	2.5	4.1	7.5	0.89	0.52	0.0124
27060	BdTR10i_r2_p	BdTR10i	4771	BVZ0055	Wagga_Winter_present	Ch03	4A3	106.983	0.5272	1	1.2	1.3	1.5	1.6	1.7	1.8	1.9	2	2.1	2.3	2.5	2.5	2.7	2.9	3	3.1	3.3	3.6	3.9	4.1	4.6	0.046	0.058	107.058	453.603	0	0	0	0	0	1	1	2	2.5	3.8	8.1	0.88	0.42	0.01975
27256	BdTR10i_r3_p	BdTR10i	4771	BVZ0055	Wagga_Winter_present	Ch03	14B5	106.983	0.5272	1.3	1.6	1.7	1.7	1.8	1.9	1.9	1.9	2.1	2.1	2.3	2.5	2.6	2.7	2.8	3.1	3.1	3.5	3.7	3.9	4.1	4.8	0.033	0.076	104.164	441.344	0	0	0	1	1	1	2	2	2.5	4	8	0.89	0.47	0.0222
27197	BdTR10i_r4_p	BdTR10i	4771	BVZ0055	Wagga_Winter_present	Ch03	11B3	106.983	0.5272	1	1	1.3	1.5	1.5	1.7	1.8	1.9	1.9	1.9	2.1	2.3	2.3	2.5	2.6	2.7	3.1	3.2	3.4	3.7	3.9	4.4	0.041	0.058	113.355	480.286	0	0	0	1	0	1	2	2	2.5	4	7.5	0.88	0.45	0.0187
27037	BdTR11a_r1_p	BdTR11a	4772	BVZ0055	Wagga_Winter_present	Ch03	2D3	106.983	0.5506	1	1	1	1.2	1.2	1.4	1.5	1.6	1.7	1.8	2.1	2.2	2.3	2.5	2.6	2.7	3.1	3.3	3.5	3.8	3.9	4.5	0.048	0.06	110.116	466.564	0	0	0	0	0	1	2	2	2.5	4.6	9.1	0.84	0.44	0.0159
27052	BdTR11a_r2_p	BdTR11a	4772	BVZ0055	Wagga_Winter_present	Ch03	3C4	106.983	0.5506	1	1	1	1.1	1.2	1.3	1.4	1.5	1.6	1.7	1.9	2	2.1	2.1	2.3	2.4	2.6	2.9	3.1	3.2	3.5	4.1	0.041	0.073	124.325	526.765	0	0	0	0	0	0	1	2	2.5	4.3	8.1	0.83	0.45	0.0154
27250	BdTR11a_r3_p	BdTR11a	4772	BVZ0055	Wagga_Winter_present	Ch03	14A4	114.182	0.5506	1	1	1	1.1	1.1	1.2	1.4	1.4	1.5	1.6	1.8	2.1	2.1	2.3	2.4	2.5	2.8	3.1	3.2	3.6	3.8	4.3	0.041	0.058	118.19	502.243	0	0	0	0	0	1	1	2	2.5	4.4	8.6	0.88	0.41	0.01485
27289	BdTR11a_r4_p	BdTR11a	4772	BVZ0055	Wagga_Winter_present	Ch03	16B1	114.182	0.5506	1	1	1	1	1.2	1.4	1.5	1.6	1.7	1.7	2	2.1	2.1	2.3	2.5	2.5	2.7	3.1	3.2	3.5	3.7	3.3	0.044	-0.023	118.19	502.243	0	0	0	0	0	0	0	1	2.25	4.3	8	0.89	0.49	0.02325
27028	BdTR11g_r1_p	BdTR11g	4775	BVZ0055	Wagga_Winter_present	Ch03	2B4	114.182	0.5371	1	1	1.1	1.3	1.4	1.5	1.6	1.7	1.8	1.8	2.1	2.2	2.3	2.5	2.7	2.8	2.9	3.2	3.5	3.8	3.9	4.4	0.044	0.051	108.059	459.193	0	0	0	0	0	0	0	2	2.5	4.5	8.8	0.88	0.48	0.0164
27049	BdTR11g_r2_p	BdTR11g	4775	BVZ0055	Wagga_Winter_present	Ch03	3C1	114.182	0.5371	1	1	1	1	1.1	1.2	1.3	1.3	1.4	1.5	1.7	2.1	2.1	2.3	2.4	2.6	2.8	3.1	3.2	3.5	3.7	4.2	0.04	0.058	118.19	502.243	0	0	0	0	0	1	1	2	2.5	4	7.4	0.88	0.47	0.01885
27232	BdTR11g_r3_p	BdTR11g	4775	BVZ0055	Wagga_Winter_present	Ch03	13A5	114.182	0.5371	1	1	1	1.3	1.3	1.5	1.5	1.6	1.8	1.8	2.1	2.3	2.4	2.6	2.8	2.9	3.1	3.2	3.5	3.8	3.9	4.5	0.049	0.06	108.059	459.193	0	0	0	0	0	1	1	2	2.5	4.3	7.5	0.88	0.48	0.01675
27193	BdTR11g_r4_p	BdTR11g	4775	BVZ0055	Wagga_Winter_present	Ch03	11A4	121.326	0.5371	1	1	1	1	1.1	1.1	1.3	1.3	1.4	1.5	1.7	1.8	2.1	2.2	2.4	2.5	2.7	3	3.1	3.4	3.6	4.2	0.037	0.067	119.698	510.21	0	0	0	0	0	0	1	2	2.5	3.8	7	0.88	0.41	0.01815
27110	BdTR12a_r1_p	BdTR12a	4776	BVZ0055	Wagga_Winter_present	Ch03	6C5	114.182	0.5096	1	1	1	1	1.1	1	1.1	1.1	1.1	1.3	1.4	1.5	1.5	2.1	2.4	2.5	2.8	2.9	3.1	3.3	3.6	4.1	0.019	0.064	122.003	518.444	0	0	0	0	0	0	0	2	2.5	3.9	7.8	0.89	0.43	0.01925
27075	BdTR12a_r2_p	BdTR12a	4776	BVZ0055	Wagga_Winter_present	Ch03	4D3	114.182	0.5096	1	1	1	1	1	1	1	1	1	1	1.1	1.3	1.3	1.4	1.5	2.1	2.2	2.6	2.9	2.9	3.1	3.7	0.009	0.067	130.416	554.199	0	0	0	0	0	0	0	0	2	3.4	4.8	0.89	0.43	0.0164
27255	BdTR12a_r3_p	BdTR12a	4776	BVZ0055	Wagga_Winter_present	Ch03	14B4	114.182	0.5096	1	1	1	1	1	1.1	1.2	1.3	1.4	1.5	1.7	1.8	2.1	2.3	2.4	2.7	2.9	2.9	3.1	3.3	3.6	4.2	0.038	0.073	122.003	518.444	0	0	0	0	0	0	0	1	1.75	3.1	6.5	0.89	0.43	0.01555
27269	BdTR12a_r4_p	BdTR12a	4776	BVZ0055	Wagga_Winter_present	Ch03	15A5	106.983	0.5096	1	1	1	1	1	1	1	1	1.1	1.2	1.3	1.4	1.5	1.6	1.8	1.8	2.1	2.5	2.8	2.9	2.9	3.8	0.017	0.081	137.645	583.204	0	0	0	0	0	0	0	0	2.25	3.5	4.1	0.89	0.44	0.03225
27001	BdTR13c_r1_p	BdTR13c	4779	BVZ0055	Wagga_Winter_present	Ch03	1A1	106.983	0.4323	1	1.1	1.2	1.3	1.4	1.6	1.7	1.8	1.9	2.1	2.3	2.5	2.6	2.8	2.9	3.1	3.2	3.6	3.8	4.1	4.2	4.9	0.054	0.069	101.423	429.73	0	0	0	0	0	0	0	1	2	3.5	9	0.88	0.41	0.0103
27058	BdTR13c_r2_p	BdTR13c	4779	BVZ0055	Wagga_Winter_present	Ch03	4A1	106.983	0.4323	1	1.1	1.2	1.3	1.4	1.6	1.7	1.8	1.9	2.1	2.4	2.6	2.7	2.9	2.9	3.1	3.3	3.7	3.9	4.1	4.2	5.1	0.058	0.087	98.8223	418.711	0	0	0	0	0	0	0	3	2	3.3	7.9	0.89	0.47	0.01665
27262	BdTR13c_r3_p	BdTR13c	4779	BVZ0055	Wagga_Winter_present	Ch03	14D1	106.983	0.4323	1.1	1.1	1.1	1.2	1.3	1.5	1.6	1.7	1.7	2.1	2.5	2.5	2.7	2.9	3.1	3.2	3.3	3.6	3.8	4.1	4.1	4.9	0.06	0.072	101.423	429.73	0	0	0	0	0	1	1	2	2	3.3	7	0.89	0.48	0.0218
27227	BdTR13c_r4_p	BdTR13c	4779	BVZ0055	Wagga_Winter_present	Ch03	12D4	128.418	0.4323	1	1	1	1	1.1	1.1	1.2	1.3	1.4	1.6	1.7	1.8	2.1	2.2	2.3	2.5	2.7	2.9	3.1	3.2	3.5	4.2	0.038	0.082	117.41	501.929	0	0	0	0	0	0	0	0	1.75	3.3	6.6	0.87	0.46	0.01375
27100	BdTR13d_r1_p	BdTR13d	4780	BVZ0055	Wagga_Winter_present	Ch03	6A5	106.983	0.4365	1.2	1.3	1.4	1.5	1.7	1.8	1.9	1.9	2.1	2.3	2.6	2.8	2.9	3.1	3.3	3.3	3.6	3.9	4.1	4.3	4.5	5.2	0.057	0.076	94.0017	398.286	0	0	0	0	0	1	1	3	2	3.9	9.1	0.89	0.46	0.01505
27062	BdTR13d_r2_p	BdTR13d	4780	BVZ0055	Wagga_Winter_present	Ch03	4A5	106.983	0.4365	1	1.3	1.3	1.5	1.6	1.7	1.8	1.9	1.9	2	2.3	2.4	2.5	2.7	3	3.1	3.2	3.5	3.8	3.9	4.2	4.9	0.043	0.082	101.423	429.73	0	0	0	0	0	0	1	3	4	3.8	8.8	0.9	0.46	0.01715
27214	BdTR13d_r4_p	BdTR13d	4780	BVZ0055	Wagga_Winter_present	Ch03	12B1	106.983	0.4365	1	1.1	1.2	1.4	1.4	1.6	1.6	1.7	2	2	2.3	2.5	2.5	2.7	2.9	3.1	3.2	3.5	3.7	3.9	4.1	4.9	0.051	0.085	104.164	441.344	0	0	0	0	0	0	1	2	2.25	3.5	8	0.89	0.47	0.02335
27098	BdTR1c_r1_p	BdTR1c	4783	BVZ0055	Wagga_Winter_present	Ch03	6A3	106.983	0.4471	1.2	1.3	1.4	1.5	1.6	1.7	1.8	1.8	2	2	2.2	2.4	2.5	2.7	2.8	2.9	3.1	3.3	3.5	3.8	3.9	4.5	0.041	0.06	110.116	466.564	0	0	0	0	0	1	1	3	2.5	4.4	7.5	0.88	0.45	0.01595
27051	BdTR1c_r2_p	BdTR1c	4783	BVZ0055	Wagga_Winter_present	Ch03	3C3	106.983	0.4471	1	1	1.3	1.3	1.4	1.5	1.6	1.6	1.7	1.8	2	2.1	2.2	2.3	2.5	2.6	2.7	3.1	3.2	3.5	3.7	4.2	0.038	0.058	120.44	510.304	0	0	0	0	0	1	2	2	2.5	3.7	6.6	0.86	0.43	0.0175
27155	BdTR1c_r3_p	BdTR1c	4783	BVZ0055	Wagga_Winter_present	Ch03	9A4	114.182	0.4471	1	1	1	1	1.3	1.4	1.6	1.6	1.7	1.8	2	2	2.1	2.2	2.4	2.5	2.7	2.9	3.1	3.4	3.7	4.2	0.042	0.064	122.003	518.444	0	0	0	0	0	0	0	1	2.25	2.8	6.4	0.88	0.47	0.01845
27224	BdTR1c_r4_p	BdTR1c	4783	BVZ0055	Wagga_Winter_present	Ch03	12D1	106.983	0.4471	1	1	1.2	1.3	1.4	1.5	1.6	1.7	1.7	1.8	2	2.1	2.1	2.2	2.4	2.5	2.6	2.8	3.1	3.3	3.5	4.2	0.037	0.076	124.325	526.765	0	0	0	0	0	0	2	2	2.75	4	6.1	0.89	0.46	0.01405
27080	BdTR1d_r1_p	BdTR1d	4784	BVZ0055	Wagga_Winter_present	Ch03	5A4	106.983	0.4733	1	1	1	1.1	1.3	1.3	1.4	1.5	1.6	1.6	1.8	2.1	2.2	2.4	2.5	2.7	2.9	3.1	3.2	3.5	3.7	4.3	0.041	0.067	120.44	510.304	0	0	0	0	0	0	1	2	3	3.8	7.6	0.88	0.36	0.0148
27150	BdTR1d_r2_p	BdTR1d	4784	BVZ0055	Wagga_Winter_present	Ch03	8D3	106.983	0.4733	1	1	1.2	1.3	1.4	1.5	1.6	1.7	1.8	1.8	2.1	2.2	2.3	2.5	2.7	2.8	3	3.1	3.3	3.6	3.8	4.3	0.043	0.058	116.79	494.84	0	0	0	0	0	2	2	2	2	4.1	7.5	0.89	0.46	0.01365
27156	BdTR1d_r3_p	BdTR1d	4784	BVZ0055	Wagga_Winter_present	Ch03	9A5	114.182	0.4733	1	1	1	1.1	1.2	1.3	1.4	1.4	1.5	1.5	1.7	1.7	2.1	2.2	2.4	2.5	2.7	2.9	3.1	3.3	3.5	4.2	0.033	0.076	122.003	518.444	0	0	0	0	0	0	0	2	2.5	3.3	5.5	0.89	0.48	0.01405
27293	BdTR1d_r4_p	BdTR1d	4784	BVZ0055	Wagga_Winter_present	Ch03	16B5	106.983	0.4733	1	1	1	1.3	1.3	1.4	1.5	1.6	1.7	1.8	2.1	2.2	2.3	2.4	2.6	2.7	2.9	3.1	3.2	3.5	3.8	4.3	0.046	0.064	120.44	510.304	0	0	0	1	1	1	2	2	2.75	4.2	7	0.89	0.49	0.0159
27025	BdTR1k_r1_p	BdTR1k	4788	BVZ0055	Wagga_Winter_present	Ch03	2B1	106.983	0.4762	1.1	1.3	1.3	1.4	1.5	1.6	1.6	1.7	1.8	2	2.1	2.3	2.4	2.6	2.7	2.8	3.1	3.2	3.4	3.7	3.9	4.4	0.04	0.058	113.355	480.286	0	0	0	1	1	2	2	2	3	4	7	0.89	0.46	0.0172
27136	BdTR1k_r2_p	BdTR1k	4788	BVZ0055	Wagga_Winter_present	Ch03	8A4	106.983	0.4762	1.3	1.4	1.4	1.4	1.6	1.7	1.7	1.8	2.1	2.1	2.3	2.5	2.6	2.7	2.9	3.1	3.2	3.5	3.6	3.9	4.1	4.7	0.045	0.067	107.058	453.603	0	0	0	0	2	2	2	2	2.5	3.7	6.3	0.88	0.47	0.0181
27153	BdTR1k_r3_p	BdTR1k	4788	BVZ0055	Wagga_Winter_present	Ch03	9A2	106.983	0.4762	1	1.2	1.3	1.4	1.5	1.6	1.7	1.7	1.8	1.8	2.1	2.2	2.3	2.4	2.6	2.7	2.8	3.1	3.2	3.5	3.7	4.3	0.037	0.067	120.44	510.304	0	0	0	0	0	0	1	2	2.5	4	7.9	0.87	0.47	0.0121
27270	BdTR1k_r4_p	BdTR1k	4788	BVZ0055	Wagga_Winter_present	Ch03	15B1	106.983	0.4762	1	1.2	1.2	1.3	1.4	1.5	1.6	1.6	1.7	1.8	2.1	2.2	2.3	2.4	2.6	2.7	3.1	3.1	3.2	3.5	3.6	4.4	0.04	0.078	120.44	510.304	0	0	0	0	0	1	2	2	2.5	3.9	6.8	0.89	0.47	0.0157
27011	BdTR2a_r1_p	BdTR2a	4789	BVZ0055	Wagga_Winter_present	Ch03	1C1	106.983	0.4729	1	1	1.1	1.2	1.3	1.3	1.5	1.6	1.6	1.7	2.2	2.3	2.4	2.7	2.8	2.9	3.1	3.2	3.4	3.7	3.9	4.4	0.049	0.058	113.355	480.286	0	1	1	1	1	1	2	2	2.5	3.7	6.3	0.89	0.45	0.01655
27073	BdTR2a_r2_p	BdTR2a	4789	BVZ0055	Wagga_Winter_present	Ch03	4D1	106.983	0.4729	1	1.1	1.2	1.3	1.4	1.5	1.6	1.6	1.7	1.8	2.1	2.3	2.4	2.6	2.7	2.8	2.9	3.1	3.2	3.6	3.8	4.2	0.044	0.049	120.44	510.304	0	0	0	0	0	0	0	2	2	4.5	8.8	0.9	0.46	0.01385
27260	BdTR2a_r3_p	BdTR2a	4789	BVZ0055	Wagga_Winter_present	Ch03	14C4	106.983	0.4729	1.2	1	1	1.2	1.3	1.4	1.4	1.5	1.6	1.6	1.7	1.8	2.1	2.2	2.4	2.5	2.6	2.8	3.1	3.3	3.5	4.3	0.034	0.085	124.325	526.765	0	0	0	1	1	1	1	0	2.5	3.7	6	0.88	0.43	0.02275
27296	BdTR2a_r4_p	BdTR2a	4789	BVZ0055	Wagga_Winter_present	Ch03	16C3	135.892	0.4729	1	1	1	1	1	1	1	1	1	1	1	1	1	1	1.5	1.5	1.6	1.8	2.1	2.3	2.5	3.2	0	0.076	169.761	728.808	0	0	0	0	0	0	0	0	.	.	5	0.85	0.44	0.0229
27032	BdTR2j_r1_p	BdTR2j	4793	BVZ0055	Wagga_Winter_present	Ch03	2C3	106.983	0.4757	1	1.1	1.3	1.3	1.4	1.5	1.5	1.6	1.7	1.7	2.1	2.2	2.3	2.5	2.7	2.7	2.9	3.1	3.3	3.6	3.8	4.4	0.04	0.067	116.79	494.84	0	0	1	1	1	1	2	2	3	4	6.9	0.86	0.49	0.01785
27128	BdTR2j_r2_p	BdTR2j	4793	BVZ0055	Wagga_Winter_present	Ch03	7C5	106.983	0.4757	1	1.1	1.3	1.5	1.5	1.6	1.7	1.8	1.9	1.9	2.1	2.3	2.3	2.5	2.6	2.8	3.1	3.1	3.3	3.6	3.8	4.4	0.04	0.067	116.79	494.84	0	0	0	0	1	2	2	2	3	4.4	7.3	0.9	0.45	0.01885
27252	BdTR2j_r3_p	BdTR2j	4793	BVZ0055	Wagga_Winter_present	Ch03	14B1	106.983	0.4757	1	1	1	1	1	1	1	1	1.1	1.2	1.3	1.5	1.5	1.5	2.1	2.2	2.5	2.8	2.9	2.9	3	3.8	0.019	0.078	132.899	563.094	0	0	0	0	0	0	0	2	2.25	3.2	3.4	0.89	0.48	0.0169
27290	BdTR2j_r4_p	BdTR2j	4793	BVZ0055	Wagga_Winter_present	Ch03	16B2	114.182	0.4757	1	1	1	1.1	1.1	1.2	1.3	1.4	1.4	1.5	1.7	1.7	2.1	2.1	2.3	2.3	2.5	2.8	3	3.1	3.3	3.8	0.034	0.058	126.069	535.725	0	0	0	0	0	1	1	2	2.5	3.5	5.4	0.88	0.46	0.01755
27005	BdTR2p_r1_p	BdTR2p	4796	BVZ0055	Wagga_Winter_present	Ch03	1A5	106.983	0.4527	1	1.1	1.2	1.3	1.3	1.4	1.5	1.6	1.7	1.7	2	2.1	2.2	2.3	2.5	2.6	2.8	3	3.1	3.4	3.6	4.2	0.038	0.067	124.325	526.765	0	0	0	0	0	0	2	2	2.5	3.7	6.5	0.89	0.45	0.01585
27066	BdTR2p_r2_p	BdTR2p	4796	BVZ0055	Wagga_Winter_present	Ch03	4B4	106.983	0.4527	1	1	1	1.2	1.3	1.4	1.5	1.5	1.7	1.7	2.1	2.2	2.3	2.5	2.6	2.7	2.9	3.1	3.3	3.6	3.7	4.4	0.047	0.069	116.79	494.84	0	0	1	1	1	1	2	2	2.5	4	6.5	0.89	0.55	0.01575
27246	BdTR2p_r3_p	BdTR2p	4796	BVZ0055	Wagga_Winter_present	Ch03	13D4	106.983	0.4527	1	1	1.1	1.3	1.3	1.4	1.5	1.6	1.7	1.8	2.1	2.2	2.2	2.4	2.6	2.6	2.8	3.1	3.1	3.4	3.6	4.4	0.044	0.085	124.325	526.765	0	0	0	1	1	1	2	2	2.5	4.3	6.4	0.88	0.48	0.0262
27202	BdTR2p_r4_p	BdTR2p	4796	BVZ0055	Wagga_Winter_present	Ch03	11C3	106.983	0.4527	1	1.1	1.3	1.4	1.5	1.6	1.6	1.7	1.8	1.8	2.1	2.2	2.2	2.5	2.6	2.6	2.7	3.1	3.2	3.5	3.7	4.3	0.037	0.067	120.44	510.304	0	0	0	0	1	1	2	2	2.5	4	6.6	0.86	0.48	0.0158
27007	BdTR3a_r1_p	BdTR3a	4797	BVZ0055	Wagga_Winter_present	Ch03	1B2	106.983	0.4503	1	1.2	1.3	1.5	1.6	1.7	1.8	1.9	2.1	2.2	2.3	2.5	2.6	2.8	2.9	3.1	3.3	3.6	3.8	4.1	4.2	4.9	0.049	0.069	101.423	429.73	0	1	1	1	2	2	2	2	2.5	4.4	9.1	0.87	0.43	0.01835
27143	BdTR3a_r2_p	BdTR3a	4797	BVZ0055	Wagga_Winter_present	Ch03	8C1	106.983	0.4503	1	1.1	1.2	1.3	1.4	1.6	1.7	1.8	1.9	1.9	2.1	2.3	2.4	2.6	2.7	2.8	3.1	3.2	3.5	3.8	3.9	4.4	0.045	0.051	110.116	466.564	0	0	0	0	1	1	2	2	2.5	4.6	8.8	0.89	0.48	0.01855
27236	BdTR3a_r3_p	BdTR3a	4797	BVZ0055	Wagga_Winter_present	Ch03	13B4	106.983	0.4503	1	1	1	1	1.2	1.4	1.5	1.6	1.8	1.8	2.1	2.2	2.3	2.5	2.8	2.9	2.9	3.1	3.3	3.7	3.9	4.4	0.05	0.058	116.79	494.84	0	0	0	0	0	1	2	2	2.25	4.4	9	0.83	0.49	0.0166
27213	BdTR3a_r4_p	BdTR3a	4797	BVZ0055	Wagga_Winter_present	Ch03	12A5	106.983	0.4503	1	1	1	1.2	1.3	1.4	1.5	1.6	1.7	1.8	2.1	2.2	2.3	2.4	2.6	2.7	2.9	3.1	3.2	3.5	3.7	4.4	0.047	0.076	120.44	510.304	0	0	0	0	0	1	1	2	2	4.7	8.5	0.88	0.41	0.01965
27094	BdTR3b_r1_p	BdTR3b	4798	BVZ0055	Wagga_Winter_present	Ch03	5D3	106.983	0.464	1	1	1.2	1.3	1.4	1.6	1.7	1.8	1.9	1.9	2.2	2.4	2.5	2.7	2.8	2.9	3.2	3.5	3.6	3.9	4.1	4.7	0.05	0.067	107.058	453.603	0	0	0	1	1	1	2	2	2	4.7	8.4	0.85	0.45	0.01975
27146	BdTR3b_r2_p	BdTR3b	4798	BVZ0055	Wagga_Winter_present	Ch03	8C4	106.983	0.464	1	1	1.1	1.3	1.5	1.6	1.7	1.8	1.9	2.1	2.3	2.6	2.6	2.9	2.9	3.1	3.1	3.5	3.7	3.9	4.1	4.7	0.057	0.067	104.164	441.344	0	0	0	0	0	2	2	3	2.5	5.1	9.4	0.87	0.53	0.0211
27175	BdTR3b_r3_p	BdTR3b	4798	BVZ0055	Wagga_Winter_present	Ch03	10A5	106.983	0.464	1	1	1	1.1	1.2	1.3	1.4	1.5	1.7	1.7	2.1	2.3	2.5	2.7	2.8	2.9	3.1	3.3	3.5	3.7	3.9	4.5	0.053	0.067	110.116	466.564	0	0	0	0	0	1	2	2	2.5	4.3	7.5	0.88	0.48	0.0213
27196	BdTR3b_r4_p	BdTR3b	4798	BVZ0055	Wagga_Winter_present	Ch03	11B2	114.182	0.464	1	1	1	1.1	1.1	1.2	1.3	1.4	1.6	1.7	2.1	2.1	2.2	2.4	2.6	2.7	2.9	3.1	3.1	3.4	3.7	4.3	0.047	0.073	122.003	518.444	0	0	0	0	0	0	0	2	2.25	4.4	8.4	0.87	0.49	0.02405
27038	BdTR3s_r1_p	BdTR3s	4802	BVZ0055	Wagga_Winter_present	Ch03	2D4	106.983	0.4763	1	1	1.2	1.4	1.5	1.6	1.7	1.8	1.9	1.9	2.2	2.4	2.5	2.7	2.8	3.1	3.2	3.5	3.6	3.9	4.1	4.7	0.049	0.067	107.058	453.603	0	0	0	1	1	2	2	3	2.5	4.5	8	0.88	0.5	0.02125
27122	BdTR3s_r2_p	BdTR3s	4802	BVZ0055	Wagga_Winter_present	Ch03	7B4	114.182	0.4763	1	1	1.1	1.3	1.4	1.5	1.6	1.7	1.9	1.9	2.1	2.3	2.4	2.6	2.8	2.9	3.1	3.3	3.6	3.8	3.9	4.5	0.048	0.06	105.058	446.438	0	0	0	0	0	2	2	2	2.5	4.9	10.1	0.86	0.58	0.01695
27188	BdTR3s_r3_p	BdTR3s	4802	BVZ0055	Wagga_Winter_present	Ch03	10D3	106.983	0.4763	1	1	1.3	1.5	1.5	1.7	1.7	1.8	1.9	1.9	2.1	2.3	2.3	2.5	2.7	2.7	3.1	3.3	3.5	3.8	3.9	4.7	0.041	0.078	110.116	466.564	0	0	0	0	1	1	2	2	2.25	4.3	8.3	0.88	0.48	0.0189
27301	BdTR3s_r4_p	BdTR3s	4802	BVZ0055	Wagga_Winter_present	Ch03	16D3	106.983	0.4763	1	1.2	1.4	1.5	1.6	1.7	1.9	1.9	1.9	1.9	2.2	2.4	2.4	2.6	2.6	2.7	3.1	3.5	3.6	3.9	4.1	4.7	0.04	0.067	107.058	453.603	0	0	0	0	0	2	2	3	2.25	4.4	8.2	0.86	0.44	0.0207
27027	BdTR5m_r1_p	BdTR5m	4806	BVZ0055	Wagga_Winter_present	Ch03	2B3	106.983	0.4374	1	1	1	1.2	1.3	1.3	1.5	1.6	1.7	1.7	2.1	2.2	2.2	2.5	2.6	2.7	2.9	3.1	3.3	3.6	3.9	4.4	0.046	0.064	116.79	494.84	0	0	0	0	0	0	0	2	2.5	4.5	8.3	0.88	0.48	0.0209
27042	BdTR5m_r2_p	BdTR5m	4806	BVZ0055	Wagga_Winter_present	Ch03	3A4	106.983	0.4374	1	1	1.1	1.2	1.3	1.4	1.5	1.6	1.7	1.8	2.1	2.3	2.3	2.5	2.7	2.7	2.9	3.2	3.3	3.6	3.9	4.3	0.047	0.055	116.79	494.84	0	0	0	1	1	1	2	2	2.5	4.2	7	0.88	0.4	0.0207
27185	BdTR5m_r3_p	BdTR5m	4806	BVZ0055	Wagga_Winter_present	Ch03	10C5	106.983	0.4374	1	1	1	1	1.1	1.1	1.2	1.3	1.4	1.5	1.7	1.7	2.1	2.1	2.3	2.4	2.6	2.8	3.1	3.2	3.5	4.2	0.036	0.082	124.325	526.765	0	0	0	0	0	0	1	2	2.25	4	6.3	0.89	0.46	0.0196
27273	BdTR5m_r4_p	BdTR5m	4806	BVZ0055	Wagga_Winter_present	Ch03	15B4	106.983	0.4374	1	1	1	1.2	1.2	1.3	1.5	1.5	1.7	1.8	2	2.1	2.2	2.3	2.5	2.6	2.8	2.9	3.1	3.5	3.6	4.2	0.045	0.06	124.325	526.765	0	0	0	0	0	0	0	1	2.25	4.8	7.6	0.88	0.46	0.0126
27099	BdTR9a_r1_p	BdTR9a	4808	BVZ0055	Wagga_Winter_present	Ch03	6A4	106.983	0.4766	1	1	1.1	1.3	1.4	1.5	1.6	1.7	1.9	1.9	2.1	2.3	2.4	2.6	2.7	2.8	3.1	3.3	3.5	3.9	4	4.6	0.048	0.06	110.116	466.564	0	0	1	1	1	2	2	2	2.5	4.3	9.4	0.89	0.44	0.0131
27119	BdTR9a_r2_p	BdTR9a	4808	BVZ0055	Wagga_Winter_present	Ch03	7B1	114.182	0.4766	1	1	1	1.2	1.2	1.3	1.4	1.5	1.7	1.7	2.1	2.2	2.2	2.5	2.6	2.8	3.1	3.3	3.5	3.8	4	4.6	0.047	0.067	108.059	459.193	0	0	1	1	1	2	2	2	2.5	3.7	8.9	0.9	0.44	0.0127
27154	BdTR9a_r3_p	BdTR9a	4808	BVZ0055	Wagga_Winter_present	Ch03	9A3	114.182	0.4766	1	1	1.1	1.3	1.4	1.5	1.6	1.7	1.9	1.9	2.1	2.3	2.4	2.6	2.8	2.8	2.9	3.2	3.5	3.7	3.9	4.5	0.048	0.067	108.059	459.193	0	0	0	0	0	1	2	2	2.5	4.2	8	0.87	0.45	0.0214
27216	BdTR9a_r4_p	BdTR9a	4808	BVZ0055	Wagga_Winter_present	Ch03	12B3	106.983	0.4766	1	1	1.1	1.3	1.3	1.4	1.6	1.7	1.8	1.8	2.1	2.2	2.2	2.3	2.5	2.6	2.7	3.1	3.2	3.5	3.8	4.4	0.044	0.073	120.44	510.304	0	0	0	1	1	1	2	2	2.5	4	8.6	0.86	0.49	0.0202
27106	BdTR9f_r1_p	BdTR9f	4809	BVZ0055	Wagga_Winter_present	Ch03	6C1	106.983	0.516	1.1	1.2	1.4	1.6	1.6	1.7	1.9	1.9	1.9	2.1	2.3	2.4	2.5	2.7	2.7	3.1	3.2	3.6	3.7	3.9	4.1	4.8	0.042	0.076	104.164	441.344	0	1	1	1	1	2	2	2	2	4.2	8.5	0.89	0.46	0.0113
27048	BdTR9f_r2_p	BdTR9f	4809	BVZ0055	Wagga_Winter_present	Ch03	3B5	106.983	0.516	1	1	1.2	1.4	1.5	1.7	1.8	1.9	1.9	1.9	2.2	2.3	2.4	2.6	2.6	2.7	3.1	3.4	3.6	3.9	4.1	4.6	0.045	0.058	107.058	453.603	0	1	1	1	1	2	2	2	2.5	3.7	8.3	0.89	0.49	0.00815
27179	BdTR9f_r3_p	BdTR9f	4809	BVZ0055	Wagga_Winter_present	Ch03	10B4	106.983	0.516	1	1	1	1	1	1	1	1	1	1	1.1	1.2	1.3	1.4	1.4	1.5	2.1	2.4	2.7	2.9	3	3.9	0.008	0.087	142.743	604.805	0	0	0	0	0	0	0	0	2	2.5	3.8	0.87	0.54	0.0116
27276	BdTR9f_r4_p	BdTR9f	4809	BVZ0055	Wagga_Winter_present	Ch03	15C2	106.983	0.516	1	1	1	1.2	1.3	1.4	1.5	1.6	1.7	1.8	2	2.1	2.2	2.3	2.5	2.7	2.9	3.1	3.2	3.6	3.9	4.3	0.043	0.055	120.44	510.304	0	0	0	0	0	0	1	2	2.25	4	9	0.89	0.46	0.0265
27113	Cas1_r1_p	Cas1	4190	BVZ0055	Wagga_Winter_present	Ch03	6D3	114.182	0.3386	1	1	1	1	1.1	1.2	1.4	1.4	1.5	1.6	2.1	2.2	2.3	2.5	2.6	2.8	2.9	3.1	3.3	3.6	3.8	4.3	0.05	0.058	114.608	487.023	0	0	0	1	1	1	1	2	2	4	6	0.89	0.42	0.02045
27039	Cas1_r2_p	Cas1	4190	BVZ0055	Wagga_Winter_present	Ch03	3A1	106.983	0.3386	1	1	1	1.1	1.2	1.3	1.4	1.5	1.6	1.7	2.2	2.4	2.5	2.7	2.8	2.9	3.1	3.3	3.5	3.8	3.9	4.4	0.055	0.051	110.116	466.564	0	0	1	1	1	1	2	2	2.5	3.4	5.3	0.89	0.39	0.0219
27152	Cas1_r3_p	Cas1	4190	BVZ0055	Wagga_Winter_present	Ch03	9A1	114.182	0.3386	1	1	1	1.2	1.2	1.3	1.4	1.4	1.6	1.6	2.1	2.3	2.3	2.5	2.7	2.8	2.9	3.1	3.2	3.5	3.8	4.3	0.048	0.064	118.19	502.243	0	0	0	0	0	1	1	2	2	4	7.3	0.88	0.44	0.02695
27190	Cas1_r4_p	Cas1	4190	BVZ0055	Wagga_Winter_present	Ch03	11A1	128.418	0.3386	1	1	1	1	1.1	1.2	1.3	1.4	1.5	1.5	1.7	1.8	2.1	2.2	2.4	2.5	2.6	2.8	3.1	3.2	3.5	4.2	0.037	0.082	117.41	501.929	0	0	0	0	1	1	1	2	2.5	3.5	5.5	0.88	0.45	0.0227
27089	Cas2_r1_p	Cas2	4191	BVZ0055	Wagga_Winter_present	Ch03	5C3	114.182	0.4046	1	1	1.1	1.3	1.4	1.6	1.8	1.8	1.9	1.9	2.1	2.3	2.3	2.5	2.6	2.7	2.8	3.1	3.3	3.6	3.8	4.2	0.046	0.049	114.608	487.023	0	0	1	1	1	1	1	2	2.5	3	5.5	0.82	0.45	0.01955
27055	Cas2_r2_p	Cas2	4191	BVZ0055	Wagga_Winter_present	Ch03	3D2	114.182	0.4046	1	1	1.1	1.3	1.4	1.6	1.7	1.8	1.9	1.9	2.1	2.2	2.3	2.4	2.5	2.6	2.7	3.1	3.1	3.3	3.5	4.1	0.045	0.067	122.003	518.444	0	0	0	1	1	1	1	2	2.5	3.5	5	0.88	0.45	0.0241
27173	Cas2_r3_p	Cas2	4191	BVZ0055	Wagga_Winter_present	Ch03	10A3	128.418	0.4046	1	1	1	1	1.1	1.2	1.3	1.4	1.5	1.6	1.8	1.9	1.9	2.1	2.2	2.3	2.4	2.7	2.8	3.1	3.2	3.6	0.037	0.042	129.99	555.708	0	0	0	0	0	1	1	2	2.5	3.1	3.7	0.87	0.45	0.02255
27300	Cas2_r4_p	Cas2	4191	BVZ0055	Wagga_Winter_present	Ch03	16D2	135.892	0.4046	1	1	1	1	1.1	1.3	1.4	1.5	1.6	1.7	1.9	1.9	2	2.1	2.2	2.2	2.3	2.6	2.7	2.9	3.1	3.8	0.04	0.076	132.036	566.851	0	0	0	0	1	1	1	2	2.5	3.8	3.6	0.88	0.44	0.0233
27036	Gal1_r1_p	Gal1	4210	BVZ0055	Wagga_Winter_present	Ch03	2D2	114.182	0.3605	1	1	1	1	1.1	1.1	1.2	1.3	1.4	1.5	1.7	1.8	2.1	2.2	2.4	2.5	2.7	2.9	3.1	3.2	3.4	4.1	0.037	0.076	122.003	518.444	0	0	0	0	0	1	1	2	2	5	7.2	0.89	0.46	0.0236
27053	Gal1_r2_p	Gal1	4210	BVZ0055	Wagga_Winter_present	Ch03	3C5	128.418	0.3605	1	1	1	1	1	1.1	1.2	1.3	1.4	1.5	1.8	1.9	1.9	2.1	2.3	2.3	2.5	2.8	2.9	3.2	3.3	3.9	0.037	0.06	125.507	536.545	0	0	0	0	0	0	1	1	2	3.3	4.1	0.85	0.42	0.0206
27183	Gal1_r3_p	Gal1	4210	BVZ0055	Wagga_Winter_present	Ch03	10C3	106.983	0.3605	1	1	1	1	1	1.1	1.2	1.2	1.3	1.4	1.7	1.8	1.8	2.1	2.3	2.3	2.5	2.8	2.9	3.1	3.3	3.9	0.032	0.067	132.899	563.094	0	0	0	0	0	1	1	1	2.5	4.2	6.4	0.83	0.43	0.018
27298	Gal1_r4_p	Gal1	4210	BVZ0055	Wagga_Winter_present	Ch03	16C5	106.983	0.3605	1	1	1	1	1.1	1.2	1.2	1.3	1.4	1.5	1.7	1.8	2.1	2.2	2.4	2.5	2.7	2.9	3.1	3.2	3.5	4.2	0.037	0.082	124.325	526.765	0	0	0	0	0	1	1	2	2.5	4.6	7	0.88	0.43	0.0192
27079	Gaz-2_r1_p	Gaz-2	4811	BVZ0055	Wagga_Winter_present	Ch03	5A3	106.983	0.4371	1	1.1	1.2	1.3	1.4	1.6	1.7	1.8	1.9	1.9	2.1	2.3	2.3	2.6	2.6	2.8	3.1	3.3	3.6	3.9	4.1	4.6	0.043	0.058	107.058	453.603	0	0	0	0	0	1	1	3	2.5	4.5	8	0.87	0.39	0.0163
27040	Gaz-2_r2_p	Gaz-2	4811	BVZ0055	Wagga_Winter_present	Ch03	3A2	106.983	0.4371	1	1.1	1.1	1.2	1.3	1.5	1.5	1.6	1.8	1.8	2.1	2.4	2.5	2.6	2.8	2.9	3.1	3.3	3.5	3.7	4.1	4.6	0.05	0.071	110.116	466.564	0	0	0	1	1	2	2	2	2.5	3.8	6.7	0.87	0.41	0.02005
27251	Gaz-2_r3_p	Gaz-2	4811	BVZ0055	Wagga_Winter_present	Ch03	14A5	106.983	0.4371	1	1.1	1.2	1.3	1.4	1.6	1.7	1.8	1.8	1.9	2.3	2.4	2.5	2.6	2.7	2.9	3.1	3.3	3.6	3.9	4.1	4.6	0.049	0.058	107.058	453.603	0	0	0	0	1	2	2	2	2.25	3.9	6.6	0.88	0.46	0.018
27201	Gaz-2_r4_p	Gaz-2	4811	BVZ0055	Wagga_Winter_present	Ch03	11C2	106.983	0.4371	1	1.1	1.2	1.3	1.3	1.4	1.5	1.6	1.8	1.8	2.1	2.2	2.2	2.3	2.5	2.6	2.8	3.1	3.2	3.5	3.7	4.4	0.041	0.076	120.44	510.304	0	0	0	0	0	0	1	2	2.5	4.2	7.5	0.88	0.44	0.0157
27004	Gaz-3_r1_p	Gaz-3	4812	BVZ0055	Wagga_Winter_present	Ch03	1A4	106.983	0.4797	1	1.1	1.2	1.3	1.4	1.5	1.6	1.6	1.7	1.8	2.2	2.3	2.4	2.6	2.8	2.8	3.1	3.3	3.6	3.8	3.9	4.5	0.045	0.06	107.058	453.603	0	0	0	0	0	0	1	1	2	3.7	7.3	0.88	0.43	0.01485
27116	Gaz-3_r2_p	Gaz-3	4812	BVZ0055	Wagga_Winter_present	Ch03	7A3	114.182	0.4797	1	1	1.1	1.2	1.3	1.5	1.5	1.6	1.7	1.8	2.2	2.4	2.5	2.6	2.8	2.8	3.1	3.3	3.6	3.8	4.1	4.6	0.052	0.064	105.058	446.438	0	0	0	0	0	0	0	2	2.5	3.8	6.2	0.88	0.42	0.01885
27247	Gaz-3_r3_p	Gaz-3	4812	BVZ0055	Wagga_Winter_present	Ch03	14A1	106.983	0.4797	1	1	1	1.1	1.2	1.3	1.5	1.5	1.6	1.7	2.1	2.2	2.3	2.4	2.5	2.7	2.9	3.1	3.2	3.5	3.8	4.4	0.048	0.073	120.44	510.304	0	0	0	0	0	0	1	2	2.25	3.7	6.5	0.88	0.42	0.02115
27217	Gaz-3_r4_p	Gaz-3	4812	BVZ0055	Wagga_Winter_present	Ch03	12B4	106.983	0.4797	1	1	1	1.1	1.2	1.3	1.3	1.4	1.5	1.6	2.1	2.1	2.1	2.3	2.4	2.6	2.8	3.1	3.1	3.5	3.6	4.3	0.044	0.069	124.325	526.765	0	0	0	0	0	0	0	1	2.25	3.9	6.7	0.86	0.46	0.01325
27107	Gaz6_r1_p	Gaz6	4814	BVZ0055	Wagga_Winter_present	Ch03	6C2	106.983	0.468	1	1.1	1.2	1.3	1.3	1.4	1.6	1.6	1.8	2	2.2	2.5	2.6	2.8	2.9	3.1	3.2	3.5	3.7	4.1	4.1	4.8	0.053	0.063	104.164	441.344	0	0	0	0	1	2	2	3	2.5	4	7.4	0.86	0.44	0.0167
27118	Gaz6_r2_p	Gaz6	4814	BVZ0055	Wagga_Winter_present	Ch03	7A5	114.182	0.468	1	1.2	1.3	1.5	1.6	1.7	1.8	1.9	1.9	2	2.2	2.3	2.4	2.6	2.6	3.1	3.2	3.5	3.7	3.9	4.1	4.8	0.04	0.076	102.218	434.372	0	0	0	0	0	1	1	3	2.5	4	7.7	0.9	0.42	0.02025
27245	Gaz6_r3_p	Gaz6	4814	BVZ0055	Wagga_Winter_present	Ch03	13D3	106.983	0.468	1	1	1.1	1.3	1.4	1.5	1.6	1.7	1.8	1.8	2.2	2.3	2.5	2.6	2.7	2.8	3.1	3.5	3.7	3.9	4.1	4.8	0.05	0.076	104.164	441.344	0	0	0	0	0	1	1	3	2.75	3.8	7.1	0.82	0.44	0.01495
27272	Gaz6_r4_p	Gaz6	4814	BVZ0055	Wagga_Winter_present	Ch03	15B3	106.983	0.468	1	1	1.1	1.3	1.4	1.5	1.6	1.6	1.7	1.8	2.1	2.2	2.3	2.5	2.6	2.7	2.9	3.1	3.3	3.7	3.9	4.5	0.044	0.067	116.79	494.84	0	0	0	0	0	1	2	2	2.25	3.9	7.5	0.86	0.43	0.012
27017	Kah-4_r1_p	Kah-4	4816	BVZ0055	Wagga_Winter_present	Ch03	1D2	106.983	0.5047	1	1.1	1.2	1.3	1.4	1.5	1.6	1.7	1.8	2.1	2.3	2.4	2.5	2.8	2.8	3.1	3.2	3.5	3.7	3.9	4.1	4.7	0.051	0.067	104.164	441.344	0	0	0	0	1	1	2	2	2.5	3.7	7.7	0.88	0.39	0.01235
27149	Kah-4_r2_p	Kah-4	4816	BVZ0055	Wagga_Winter_present	Ch03	8D2	106.983	0.5047	1	1	1.1	1.2	1.2	1.4	1.5	1.6	1.7	1.7	2.1	2.3	2.5	2.7	2.8	2.9	3.1	3.3	3.6	3.9	4	4.5	0.051	0.051	107.058	453.603	0	0	0	0	0	0	0	2	2.5	4	8.8	0.89	0.44	0.01705
27249	Kah-4_r3_p	Kah-4	4816	BVZ0055	Wagga_Winter_present	Ch03	14A3	106.983	0.5047	1	1	1.1	1.3	1.4	1.5	1.5	1.6	1.8	1.8	2.1	2.2	2.3	2.5	2.7	2.8	3.1	3.2	3.5	3.7	3.9	4.4	0.044	0.058	110.116	466.564	0	0	0	1	0	1	1	2	2.5	4	7.5	0.88	0.43	0.0234
27191	Kah-4_r4_p	Kah-4	4816	BVZ0055	Wagga_Winter_present	Ch03	11A2	106.983	0.5047	1	1	1.1	1.3	1.4	1.5	1.6	1.7	1.7	1.8	2.1	2.3	2.3	2.5	2.6	2.8	3.1	3.3	3.5	3.8	3.9	4.5	0.045	0.06	110.116	466.564	0	0	0	0	1	1	1	2	2.5	3.6	7	0.87	0.45	0.024
27013	Kah-5_r1_p	Kah-5	4817	BVZ0055	Wagga_Winter_present	Ch03	1C3	106.983	0.5502	1	1.1	1	1.4	1.4	1.5	1.6	1.7	1.9	2	2.3	2.5	2.6	2.8	2.9	3	3.1	3.4	3.7	3.9	4.1	4.7	0.055	0.067	104.164	441.344	0	0	0	0	0	0	1	2	2.5	4.7	9.7	0.86	0.47	0.01565
27115	Kah-5_r2_p	Kah-5	4817	BVZ0055	Wagga_Winter_present	Ch03	7A2	106.983	0.5502	1	1	1.2	1.4	1.5	1.6	1.7	1.8	2	2	2.2	2.3	2.5	2.7	2.8	3.1	3.2	3.5	3.8	3.9	4.1	4.9	0.048	0.085	101.423	429.73	0	0	0	0	0	0	1	3	3	4.5	10.2	0.88	0.45	0.0185
27253	Kah-5_r3_p	Kah-5	4817	BVZ0055	Wagga_Winter_present	Ch03	14B2	106.983	0.5502	1	1	.	1.3	1.3	1.4	1.4	1.6	1.7	1.8	2.1	2.2	2.3	2.5	2.6	2.7	2.9	3.3	3.6	3.9	3.9	4.5	0.046	0.054	107.058	453.603	0	0	0	0	0	0	0	2	2.75	4.6	10.7	0.88	0.44	0.02365
27192	Kah-5_r4_p	Kah-5	4817	BVZ0055	Wagga_Winter_present	Ch03	11A3	106.983	0.5502	1	1	1.2	1.4	1.5	1.6	1.7	1.8	1.9	2	2.1	2.3	2.4	2.6	2.7	2.9	3.1	3.3	3.5	3.9	3.9	4.5	0.045	0.054	110.116	466.564	0	0	0	0	0	0	0	1	2.5	4.5	9.4	0.87	0.39	0.0186
27015	Kah-6_r1_p	Kah-6	4818	BVZ0055	Wagga_Winter_present	Ch03	1C5	106.983	0.541	1.2	1.3	1.4	1.6	1.7	1.8	1.9	1.9	2.1	2.1	2.3	2.5	2.5	2.7	2.7	3.1	3.3	3.6	3.8	4.1	4.2	4.9	0.042	0.069	101.423	429.73	0	0	0	1	1	1	2	2	2.5	4.2	8.8	0.89	0.43	0.01415
27151	Kah-6_r2_p	Kah-6	4818	BVZ0055	Wagga_Winter_present	Ch03	8D4	106.983	0.541	1.3	1.3	1.3	1.5	1.6	1.7	1.8	1.9	2	2	2.1	2.3	2.4	2.6	2.8	2.9	3.1	3.4	3.6	3.9	4.1	4.6	0.038	0.058	107.058	453.603	0	0	0	0	0	0	1	2	2.5	4.7	9.2	0.89	0.47	0.0161
27174	Kah-6_r3_p	Kah-6	4818	BVZ0055	Wagga_Winter_present	Ch03	10A4	106.983	0.541	1	1.3	1.3	1.5	1.6	1.7	1.7	1.8	1.9	2	2.2	2.4	2.4	2.5	2.7	2.7	3.1	3.5	3.7	3.9	4.1	4.9	0.04	0.085	104.164	441.344	0	0	0	0	0	0	1	1	2.5	3.4	6.1	0.88	0.43	0.01985
27223	Kah-6_r4_p	Kah-6	4818	BVZ0055	Wagga_Winter_present	Ch03	12C5	106.983	0.541	1.1	1.1	1.4	1.6	1.6	1.7	1.8	1.9	1.9	1.9	2.1	2.2	2.3	2.5	2.6	2.7	2.9	3.2	3.5	3.7	3.9	4.5	0.035	0.067	110.116	466.564	0	0	0	0	0	0	0	1	2.25	4.5	8.2	0.89	0.44	0.02155
27109	Koz-2_r1_p	Koz-2	4819	BVZ0055	Wagga_Winter_present	Ch03	6C4	106.983	0.5058	1	1.1	1.2	1.3	1.4	1.5	1.7	1.7	1.8	1.8	2.2	2.4	2.5	2.7	2.9	2.9	3.1	3.3	3.5	3.8	4.1	4.6	0.048	0.064	110.116	466.564	0	0	0	0	0	1	1	2	2.5	4.7	8.7	0.86	0.46	0.01985
27046	Koz-2_r2_p	Koz-2	4819	BVZ0055	Wagga_Winter_present	Ch03	3B3	106.983	0.5058	1	1.1	1.2	1.3	1.4	1.6	1.7	1.8	1.9	1.9	2.1	2.3	2.3	2.5	2.7	2.8	3.1	3.2	3.5	3.8	3.9	4.5	0.043	0.06	110.116	466.564	0	0	0	0	0	2	2	2	2.5	4.1	8.2	0.88	0.44	0.02375
27230	Koz-2_r3_p	Koz-2	4819	BVZ0055	Wagga_Winter_present	Ch03	13A3	106.983	0.5058	1	1	1.1	1.4	1.5	1.6	1.8	1.9	1.9	1.9	2.2	2.3	2.4	2.6	2.6	2.9	3.1	3.3	3.5	3.9	3.9	4.6	0.047	0.063	110.116	466.564	0	0	0	0	0	0	1	1	2.25	4.7	9	0.87	0.45	0.0241
27194	Koz-2_r4_p	Koz-2	4819	BVZ0055	Wagga_Winter_present	Ch03	11A5	106.983	0.5058	1	1.2	1.3	1.5	1.6	1.7	1.8	1.9	2	2.1	2.2	2.4	2.5	2.6	2.7	2.8	3.1	3.3	3.6	3.8	4.1	4.6	0.044	0.064	107.058	453.603	0	0	0	0	0	0	0	1	2.5	4.3	7.3	0.88	0.42	0.0231
27085	Koz-3_r1_p	Koz-3	4820	BVZ0055	Wagga_Winter_present	Ch03	5B4	106.983	0.4425	1	1	1	1.2	1.3	1.3	1.4	1.5	1.6	1.6	2.1	2.2	2.3	2.5	2.7	2.8	3.1	3.2	3.5	3.7	3.9	4.5	0.046	0.067	110.116	466.564	0	0	0	1	1	1	2	2	2.5	4.1	6.7	0.85	0.48	0.01885
27064	Koz-3_r2_p	Koz-3	4820	BVZ0055	Wagga_Winter_present	Ch03	4B2	106.983	0.4425	1	1	1.1	1.3	1.4	1.5	1.5	1.6	1.8	1.8	2.1	2.3	2.4	2.5	2.6	2.7	3.1	3.3	3.5	3.8	3.9	4.5	0.047	0.06	110.116	466.564	0	0	1	1	1	1	2	2	2.5	4	7.2	0.88	0.43	0.02225
27233	Koz-3_r3_p	Koz-3	4820	BVZ0055	Wagga_Winter_present	Ch03	13B1	106.983	0.4425	1	1	1	1.2	1.3	1.4	1.5	1.5	1.6	1.7	2.1	2.1	2.2	2.4	2.6	2.7	2.8	3.1	3.3	3.6	3.8	4.5	0.044	0.076	116.79	494.84	0	0	0	1	1	1	2	2	2.5	3.9	6.4	0.89	0.46	0.0185
27294	Koz-3_r4_p	Koz-3	4820	BVZ0055	Wagga_Winter_present	Ch03	16C1	106.983	0.4425	1	1	1	1.2	1.3	1.4	1.6	1.7	1.7	1.8	2.1	2.1	2.2	2.3	2.5	2.6	2.7	3.1	3.2	3.5	3.7	4.4	0.044	0.076	120.44	510.304	0	0	0	0	0	1	1	2	2.25	4.2	6.9	0.89	0.47	0.01955
27082	Mig3_r1_p	Mig3	4239	BVZ0055	Wagga_Winter_present	Ch03	5B1	106.983	0.4072	1	1	1	1	1.1	1.2	1.3	1.4	1.5	1.6	2.1	2.2	2.3	2.4	2.6	2.7	2.8	3.2	3.3	3.5	3.7	4.3	0.05	0.067	116.79	494.84	0	0	1	1	1	2	2	2	2.5	3.2	4.9	0.89	0.43	0.0169
27123	Mig3_r2_p	Mig3	4239	BVZ0055	Wagga_Winter_present	Ch03	7B5	106.983	0.4072	1	1	1	1.1	1.2	1.3	1.3	1.4	1.6	1.7	2.2	2.4	2.4	2.5	2.7	2.8	3.1	3.3	3.5	3.7	3.9	4.4	0.054	0.058	110.116	466.564	0	1	1	1	1	2	2	2	2	3.5	5.2	0.88	0.42	0.024
27248	Mig3_r3_p	Mig3	4239	BVZ0055	Wagga_Winter_present	Ch03	14A2	106.983	0.4072	1	1	1	1.1	1.2	1.2	1.3	1.5	1.5	1.6	2.1	2.2	2.3	2.5	2.6	2.7	3.1	3.2	3.4	3.6	3.8	4.5	0.048	0.076	113.355	480.286	0	1	1	1	1	1	2	2	2.25	3.3	5	0.88	0.39	0.0298
27279	Mig3_r4_p	Mig3	4239	BVZ0055	Wagga_Winter_present	Ch03	15C5	106.983	0.4072	1	1	1	1.1	1.2	1.3	1.4	1.5	1.6	1.7	2.1	2.2	2.3	2.5	2.7	2.7	2.9	3.2	3.3	3.5	3.7	4.6	0.049	0.094	116.79	494.84	0	1	1	1	1	1	2	2	2.25	3.7	5.3	0.89	0.45	0.0294
27006	Mur3_r1_p	Mur3	4248	BVZ0055	Wagga_Winter_present	Ch03	1B1	114.182	0.3737	1	1	1	1	1.1	1.2	1.3	1.3	1.4	1.4	1.6	1.7	2.1	2.3	2.5	2.5	2.7	3.1	3.2	3.3	3.5	4.2	0.034	0.076	118.19	502.243	0	0	0	1	1	1	1	2	3	3.9	5.1	0.89	0.42	0.01825
27071	Mur3_r2_p	Mur3	4248	BVZ0055	Wagga_Winter_present	Ch03	4C4	114.182	0.3737	1	1	1	1	1.1	1.2	1.3	1.3	1.4	1.5	1.7	1.8	2.1	2.2	2.3	2.4	2.6	2.8	3.1	3.3	3.4	4	0.036	0.06	122.003	518.444	0	0	0	1	1	1	1	2	2.5	3.9	5.2	0.86	0.42	0.02235
27244	Mur3_r3_p	Mur3	4248	BVZ0055	Wagga_Winter_present	Ch03	13D2	114.182	0.3737	1	1	1	1	1	1.1	1.2	1.2	1.3	1.4	1.6	1.7	1.7	2.2	2.3	2.4	2.6	2.8	3.1	3.2	3.4	4.1	0.028	0.076	122.003	518.444	0	0	0	0	1	1	1	2	2.75	3.7	4.5	0.88	0.42	0.0309
27220	Mur3_r4_p	Mur3	4248	BVZ0055	Wagga_Winter_present	Ch03	12C2	145.978	0.3737	1	1	1	1	1	1	1	1	1.1	1.1	1.3	1.4	1.4	1.5	1.7	1.7	2.1	2.2	2.4	2.6	2.8	3.5	0.015	0.076	144.338	627.153	0	0	0	0	0	0	0	1	2.75	3.4	4	0.88	0.42	0.0286
27083	Pal1_r1_p	Pal1	4250	BVZ0055	Wagga_Winter_present	Ch03	5B2	114.182	0.3239	1	1	1	1	1.1	1.1	1.2	1.3	1.3	1.4	1.6	1.6	2.1	2.3	2.4	2.5	2.6	3.1	3.1	3.4	3.7	4.3	0.032	0.073	122.003	518.444	0	0	0	1	1	1	1	2	2.5	3.2	4.5	0.89	0.37	0.0111
27065	Pal1_r2_p	Pal1	4250	BVZ0055	Wagga_Winter_present	Ch03	4B3	114.182	0.3239	1	1	1	1	1.1	1.1	1.2	1.3	1.4	1.5	1.6	1.7	2.1	2.2	2.4	2.6	2.7	3.1	3.2	3.5	3.6	4.3	0.035	0.069	118.19	502.243	0	0	0	0	0	1	1	2	2	3.2	4.1	0.89	0.41	0.02245
27231	Pal1_r3_p	Pal1	4250	BVZ0055	Wagga_Winter_present	Ch03	13A4	114.182	0.3239	1	1	1	1	1.1	1.1	1.3	1.4	1.5	1.6	1.7	1.7	2.1	2.2	2.5	2.6	2.8	3.1	3.3	3.6	3.7	4.5	0.036	0.078	114.608	487.023	0	0	0	0	1	1	1	2	2.25	3.2	4.2	0.87	0.41	0.02955
27203	Pal1_r4_p	Pal1	4250	BVZ0055	Wagga_Winter_present	Ch03	11C4	114.182	0.3239	1	1	1	1	1	1.1	1.2	1.3	1.3	1.4	1.6	1.6	2.1	2.1	2.3	2.4	2.5	2.7	3.1	3.3	3.5	4.2	0.033	0.076	122.003	518.444	0	0	0	0	0	1	1	2	2.25	2.5	3.3	0.85	0.47	0.0175
27023	Pal2032_r1_p	Pal2032	4822	BVZ0055	Wagga_Winter_present	Ch03	2A4	114.182	0.3858	1	1	1	1	1.1	1.1	1.2	1.3	1.4	1.4	2.1	2.2	2.2	2.3	2.5	2.7	2.9	3.1	3.2	3.5	3.7	4.3	0.047	0.067	118.19	502.243	0	0	0	1	1	1	2	2	2.5	4	6	0.88	0.39	0.02205
27126	Pal2032_r2_p	Pal2032	4822	BVZ0055	Wagga_Winter_present	Ch03	7C3	106.983	0.3858	1	1	1	1	1.1	1.2	1.2	1.3	1.4	1.5	1.6	1.8	2.2	2.4	2.5	2.6	2.8	3.1	3.1	3.5	3.6	4.1	0.037	0.051	124.325	526.765	0	0	0	0	0	1	1	2	2	4	7	0.89	0.43	0.02
27172	Pal2032_r3_p	Pal2032	4822	BVZ0055	Wagga_Winter_present	Ch03	10A2	114.182	0.3858	1	1	1	1	1	1.1	1.2	1.2	1.3	1.4	1.6	1.7	2.1	2.1	2.3	2.4	2.5	2.8	2.9	3.1	3.3	3.9	0.034	0.067	130.416	554.199	0	0	0	0	0	1	1	2	2.75	3.8	5	0.88	0.43	0.02045
27210	Pal2032_r4_p	Pal2032	4822	BVZ0055	Wagga_Winter_present	Ch03	12A2	121.326	0.3858	1	1	1	1	1	1.1	1.1	1.1	1.2	1.3	1.4	1.5	1.6	2.1	2.2	2.2	2.4	2.7	2.8	3.1	3.2	3.9	0.021	0.069	132.523	564.875	0	0	0	0	0	1	1	2	2.25	3.6	5	0.89	0.39	0.0184
27104	Rei7_r1_p	Rei7	4264	BVZ0055	Wagga_Winter_present	Ch03	6B4	106.983	0.3779	1	1	1	1	1.1	1.1	1.3	1.3	1.4	1.5	1.7	2.1	2.2	2.4	2.6	2.7	2.8	3.1	3.2	3.4	3.5	4.1	0.042	0.06	120.44	510.304	0	0	0	0	1	1	1	2	2	4.5	6.8	0.85	0.56	0.01735
27067	Rei7_r2_p	Rei7	4264	BVZ0055	Wagga_Winter_present	Ch03	4B5	106.983	0.3779	1	1	1	1	1.1	1.2	1.3	1.3	1.4	1.6	1.7	1.8	2.1	2.3	2.4	2.5	2.7	2.9	3.1	3.3	3.5	4.1	0.037	0.067	124.325	526.765	0	0	0	0	1	1	1	2	2.5	4.1	5.5	0.88	0.38	0.0245
27187	Rei7_r3_p	Rei7	4264	BVZ0055	Wagga_Winter_present	Ch03	10D2	106.983	0.3779	1	1	1	1	1.1	1.2	1.3	1.3	1.4	1.5	1.7	1.7	2.1	2.3	2.5	2.6	2.7	2.9	3.1	3.3	3.4	4.1	0.035	0.069	124.325	526.765	0	0	0	0	0	1	1	2	2.25	4.1	5.2	0.88	0.43	0.019
27268	Rei7_r4_p	Rei7	4264	BVZ0055	Wagga_Winter_present	Ch03	15A4	106.983	0.3779	1	1	1	1	1	1.1	1.1	1.2	1.3	1.3	1.6	1.6	2.1	2.2	2.3	2.5	2.6	2.8	3.1	3.2	3.4	4.1	0.033	0.076	124.325	526.765	0	0	0	0	0	1	1	2	2.25	4.2	6	0.87	0.42	0.0244
27111	Sar2_r1_p	Sar2	4267	BVZ0055	Wagga_Winter_present	Ch03	6D1	114.182	0.3105	1	1	1	1	1	1.1	1.1	1.2	1.3	1.4	1.6	1.7	1.7	2.1	2.3	2.4	2.5	2.8	3.1	3.2	3.4	4	0.029	0.067	122.003	518.444	0	0	0	0	0	1	1	2	2.5	3.8	4.8	0.9	0.46	0.01875
27050	Sar2_r2_p	Sar2	4267	BVZ0055	Wagga_Winter_present	Ch03	3C2	114.182	0.3105	1	1	1	1	1.1	1.1	1.2	1.3	1.4	1.5	1.7	1.8	2.1	2.2	2.3	2.4	2.6	2.8	3.1	3.2	3.5	4.1	0.037	0.073	122.003	518.444	0	0	0	0	1	1	1	2	2.5	3.6	5	0.88	0.44	0.0254
27159	Sar2_r3_p	Sar2	4267	BVZ0055	Wagga_Winter_present	Ch03	9B3	114.182	0.3105	1	1	1	1	1	1	1	1.1	1.2	1.2	1.3	1.3	1.5	2.1	2.2	2.3	2.4	2.7	2.8	3.1	3.2	3.9	0.016	0.069	135.074	573.992	0	0	0	0	0	0	0	1	2.5	3	3.7	0.84	0.45	0.015
27218	Sar2_r4_p	Sar2	4267	BVZ0055	Wagga_Winter_present	Ch03	12B5	128.418	0.3105	1	1	1	1	1	1.1	1.1	1.2	1.3	1.3	1.5	1.5	1.6	2.1	2.2	2.3	2.5	2.7	2.8	3.1	3.2	3.7	0.023	0.051	129.99	555.708	0	0	0	0	0	1	1	1	2.5	3.7	4.7	0.89	0.45	0.0242
27029	Sig2_r1_p	Sig2	4272	BVZ0055	Wagga_Winter_present	Ch03	2B5	106.983	0.403	1	1	1	1.1	1.1	1.2	1.3	1.4	1.5	1.6	2.1	2.2	2.3	2.5	2.6	2.7	3.1	3.2	3.4	3.6	3.8	4.4	0.049	0.067	113.355	480.286	0	0	1	1	1	1	2	2	2.5	3.8	5.5	0.89	0.46	0.0192
27145	Sig2_r2_p	Sig2	4272	BVZ0055	Wagga_Winter_present	Ch03	8C3	121.326	0.403	1	1	1	1	1	1.1	1.2	1.2	1.3	1.4	1.7	1.8	1.9	2.1	2.3	2.3	2.5	2.8	2.9	3.2	3.3	4	0.034	0.069	127.953	545.396	0	0	0	0	1	1	1	2	2.5	4	5.6	0.85	0.46	0.0209
27165	Sig2_r3_p	Sig2	4272	BVZ0055	Wagga_Winter_present	Ch03	9C4	114.182	0.403	1	1	1	1	1	1.1	1.1	1.2	1.3	1.5	1.6	1.7	1.7	2.1	2.3	2.4	2.5	2.8	3.1	3.2	3.3	3.8	0.029	0.051	122.003	518.444	0	0	0	0	1	1	1	1	2.25	4.1	5	0.89	0.44	0.0213
27215	Sig2_r4_p	Sig2	4272	BVZ0055	Wagga_Winter_present	Ch03	12B2	106.983	0.403	1	1	1	1	1.1	1.1	1.3	1.3	1.4	1.5	1.7	1.8	2.1	2.2	2.4	2.5	2.6	2.9	3.1	3.2	3.4	4.2	0.037	0.085	124.325	526.765	0	0	0	0	1	1	1	2	3.5	4.3	6	0.88	0.44	0.02765
27077	USDA4006_r1_p	USDA4006	4146	BVZ0055	Wagga_Winter_present	Ch03	5A1	114.182	0.2495	1	1	1	1	1	1.1	1.1	1.2	1.3	1.5	1.6	1.7	2.1	2.4	2.5	2.7	3.1	3.3	3.5	3.8	4.1	4.6	0.035	0.064	108.059	459.193	0	0	0	0	0	0	1	2	1.5	2.5	3.9	0.89	0.35	0.0194
27130	USDA4006_r2_p	USDA4006	4146	BVZ0055	Wagga_Winter_present	Ch03	7D2	114.182	0.2495	1	1	1	1	1	1.1	1.1	1.2	1.2	1.4	1.5	1.6	2.1	2.2	2.4	2.6	2.8	2.9	3.1	3.4	3.6	4.3	0.032	0.076	122.003	518.444	0	0	0	0	0	1	1	2	1.5	2.9	3.4	0.89	0.41	0.02385
27254	USDA4006_r3_p	USDA4006	4146	BVZ0055	Wagga_Winter_present	Ch03	14B3	114.182	0.2495	1	1	1.1	1	1	1.1	1.2	1.2	1.3	1.4	1.5	1.5	2.1	2.3	2.4	2.7	2.8	3.2	3.4	3.6	3.9	4.6	0.03	0.082	111.238	472.699	0	0	0	0	0	0	0	2	1.75	2.7	4.5	0.87	0.43	0.02545
27275	USDA4006_r4_p	USDA4006	4146	BVZ0055	Wagga_Winter_present	Ch03	15C1	114.182	0.2495	1	1	1	1	1	1.1	1.2	1.2	1.3	1.3	1.6	2.1	2.2	2.5	2.6	2.8	2.9	3.2	3.4	3.6	3.8	4.6	0.04	0.085	111.238	472.699	0	0	0	0	0	0	0	2	1.5	3	4.2	0.88	0.44	0.0258
27086	WLE2-2_r1_p	WLE2-2	4825	BVZ0055	Wagga_Winter_present	Ch03	5B5	106.983	0.2977	1	1	1	1.1	1.2	1.3	1.6	1.6	1.7	1.8	1.9	1.9	2.1	2.3	2.5	2.6	2.8	3.1	3.1	3.5	3.7	4.3	0.04	0.067	124.325	526.765	0	0	0	0	0	1	2	2	2.5	4.5	8.7	0.9	0.48	0.0257
27063	WLE2-2_r2_p	WLE2-2	4825	BVZ0055	Wagga_Winter_present	Ch03	4B1	106.983	0.2977	1	1	1	1.1	1.2	1.3	1.5	1.5	1.7	1.8	1.9	2.1	2.1	2.3	2.5	2.6	2.8	3.1	3.1	3.5	3.7	4.3	0.043	0.067	124.325	526.765	0	0	0	0	0	1	1	2	2.5	4.6	8.9	0.9	0.45	0.0182
27169	WLE2-2_r3_p	WLE2-2	4825	BVZ0055	Wagga_Winter_present	Ch03	9D3	114.182	0.2977	1	1	1	1.1	1.2	1.3	1.4	1.4	1.5	1.6	1.9	1.9	2.1	2.1	2.2	2.2	2.4	2.6	2.8	3.1	3.3	4.2	0.039	0.094	135.074	573.992	0	0	0	0	0	0	1	1	2.25	3.8	6.2	0.87	0.44	0.01325
27297	WLE2-2_r4_p	WLE2-2	4825	BVZ0055	Wagga_Winter_present	Ch03	16C4	106.983	0.2977	1	1	1	1.1	1.1	1.3	1.5	1.6	1.7	1.8	1.9	2	2.1	2.2	2.4	2.5	2.7	3.1	3.1	3.5	3.7	4.4	0.042	0.076	124.325	526.765	0	0	0	0	1	1	1	2	2.25	4.7	9	0.86	0.5	0.01815
27018	Yas3_r1_p	Yas3	4277	BVZ0055	Wagga_Winter_present	Ch03	1D3	114.182	0.3573	1	1	1	1.2	1.3	1.4	1.5	1.6	1.7	1.8	2.1	2.3	2.4	2.6	2.7	2.8	3.1	3.3	3.5	3.7	4.1	4.4	0.05	0.053	108.059	459.193	0	0	1	1	1	2	2	2	2	3.6	5	0.87	0.38	0.01585
27125	Yas3_r2_p	Yas3	4277	BVZ0055	Wagga_Winter_present	Ch03	7C2	106.983	0.3573	1	1	1	1.2	1.3	1.4	1.4	1.5	1.6	1.7	2.1	2.3	2.4	2.6	2.8	2.9	3.1	3.2	3.4	3.6	3.8	4.3	0.049	0.058	113.355	480.286	0	0	0	1	1	1	2	2	1.5	3.4	4.8	0.89	0.4	0.02345
27228	Yas3_r3_p	Yas3	4277	BVZ0055	Wagga_Winter_present	Ch03	13A1	114.182	0.3573	1	1	1	1.1	1.2	1.3	1.3	1.4	1.5	1.5	2.3	2.4	2.5	2.7	2.6	2.9	3.1	3.2	3.4	3.6	3.8	4.5	0.055	0.076	111.238	472.699	0	0	1	1	1	1	2	2	1.75	3.1	4.5	0.88	0.47	0.0288
27288	Yas3_r4_p	Yas3	4277	BVZ0055	Wagga_Winter_present	Ch03	16A5	106.983	0.3573	1	1	1	1	1.2	1.3	1.5	1.6	1.6	1.7	2.2	2.2	2.4	2.5	2.6	2.7	3.1	3.2	3.4	3.6	3.8	4.4	0.052	0.067	113.355	480.286	0	0	1	1	1	1	1	2	1.75	3.2	4.7	0.89	0.43	0.03635
[truncated: 27 more columns]

## Sheet: S12 - BVZ0055 -2050 Temp - Data
PlantID	PlantName	Accession Name	AccessionID	ExperimentID	ExperimentCondition	GrowthLocation	TrayPosition	Emerg_TT	Huan_28Sep	Huan_30Sep	Huan_02Oct	Huan_05Oct	Huan_07Oct	Huan_09Oct	Huan_12Oct	Huan_14Oct	Huan_19thOct	Huan_21Oct	Huan_23Oct	Huan_26Oct	Huan_28Oct	Huan_30Oct	Huan_02Nov	Huan_06Nov	Huan_09Nov	Huan_13Nov	Huan_16Nov	Huan_02Dec	Huan_GR1	Huan_GR2	Phyll_TT	Phyll_PTU	Tiller_26Oct	Tiller_28Oct	Tiller_30Oct	Tiller_02Nov	Tiller_06Nov	Tiller_09Nov	Tiller_13Nov	Tiller_16Nov	Tiller_02Dec	L3Width	L3Length	Height_02Dec	FvFm_1	QY_1	NPQIntSlope_1	NPQMax_1	NPQDecay_1
27326	ABR2_r1_f	ABR2	4728	BVZ0055	Wagga_Winter_future	Ch04	2A5	126.582	1	1	1.1	1.2	1.3	1.4	1.5	1.6	2.1	2.2	2.3	2.6	2.7	2.8	2.9	3.1	3.4	3.6	3.8	4.8	0.0531915	0.0629393	119.393	444.733	0	0	0	1	1	1	1	2	2	2	3.9	5.9	0.89	0.44	0.02215	2.65	-0.00204762
27354	ABR2_r2_f	ABR2	4728	BVZ0055	Wagga_Winter_future	Ch04	3C4	126.582	1	1	1.1	1.3	1.5	1.6	1.6	1.8	2.1	2.2	2.3	2.4	2.6	2.7	2.8	3.1	3.2	3.5	3.8	4.8	0.056383	0.0664537	126.856	472.529	0	0	0	1	1	1	1	1	2	2.25	4.6	6.9	0.86	0.51	0.0173	1.85	-0.0030119
27459	ABR2_r3_f	ABR2	4728	BVZ0055	Wagga_Winter_future	Ch04	9B1	126.582	1	1	1.1	1.2	1.3	1.4	1.5	1.6	2.1	2.2	2.2	2.3	2.5	2.7	2.9	3.1	3.1	3.4	3.6	4.5	0.0531915	0.0573482	130.948	487.771	0	0	0	0	0	1	1	1	2	1.75	4.4	8.1	0.89	0.43	0.02375	2.49	-0.00233333
27510	ABR2_r4_f	ABR2	4728	BVZ0055	Wagga_Winter_future	Ch04	11D4	126.582	1	1	1.1	1.1	1.2	1.3	1.4	1.5	2.1	2.1	2.2	2.4	2.5	2.6	2.9	3.1	3.3	3.5	3.8	4.9	0.0515957	0.0720447	123.011	458.21	0	0	0	1	1	1	1	2	3	2	4.1	8.1	0.86	0.45	0.02205	2.19	-0.00242857
27334	ABR4_r1_f	ABR4	4730	BVZ0055	Wagga_Winter_future	Ch04	2C3	126.582	1	1	1	1.1	1.2	1.3	1.3	1.4	1.6	1.7	2.1	2.3	2.4	2.5	2.6	2.8	3.1	3.3	3.6	4.6	0.0320922	0.0664537	130.948	487.771	0	0	0	1	1	1	1	1	2	2	3.4	4.1	0.82	0.45	0.01845	1.81	-0.00165476
27371	ABR4_r2_f	ABR4	4730	BVZ0055	Wagga_Winter_future	Ch04	4C2	126.582	1	1	1	1.2	1.3	1.3	1.4	1.5	1.7	2.1	2.2	2.4	2.5	2.7	2.8	3.1	3.2	3.5	3.7	4.6	0.037234	0.0573482	126.856	472.529	0	0	0	0	1	1	1	1	2	2	3.5	5	0.87	0.46	0.0212	2.25	-0.00257143
27468	ABR4_r3_f	ABR4	4730	BVZ0055	Wagga_Winter_future	Ch04	9C5	126.582	1	1	1	1.1	1.2	1.3	1.3	1.5	1.7	2.1	2.2	2.3	2.5	2.6	2.8	3.1	3.3	3.5	3.6	4.8	0.037766	0.070607	123.011	458.21	0	0	0	1	1	1	1	2	2	2.25	3.1	4.3	0.86	0.46	0.018	1.87	-0.00161905
27519	ABR4_r4_f	ABR4	4730	BVZ0055	Wagga_Winter_future	Ch04	12B4	139.981	1	1	1.1	1.2	1.3	1.3	1.4	1.6	2.1	2.1	2.2	2.3	2.5	2.6	2.8	3.1	3.2	3.5	3.7	4.9	0.051773	0.0741214	122.668	463.581	0	0	0	1	1	1	1	1	3	1.75	3.5	5	0.86	0.46	0.0238	1.79	-0.00155952
27347	ABR5_r2_f	ABR5	4731	BVZ0055	Wagga_Winter_future	Ch04	3B2	126.582	1	1	1.1	1.2	1.4	1.5	1.6	1.7	2.3	2.4	2.5	2.7	2.8	3.1	3.2	3.4	3.7	4.1	4.1	5.4	0.0634752	0.0726837	109.713	408.673	0	0	1	1	1	1	2	2	3	2	3.2	4.7	0.87	0.41	0.0218	2.19	-0.00284524
27413	ABR5_r1_f	ABR5	4731	BVZ0055	Wagga_Winter_future	Ch04	6D1	126.582	1	1	1.1	1.2	1.3	1.4	1.5	1.6	2.2	2.3	2.6	2.8	2.8	3.2	3.4	3.7	4.1	4.3	4.5	5.9	0.0569149	0.0853035	99.0092	368.803	0	1	1	1	1	2	2	2	3	2	2.6	3.9	0.86	0.35	0.01885	2.47	-0.00358333
27515	ABR5_r4_f	ABR5	4731	BVZ0055	Wagga_Winter_future	Ch04	12A5	126.582	1	1.1	1.1	1.3	1.4	1.5	1.6	1.6	2.4	2.5	2.7	2.9	2.9	3.1	3.5	3.7	4.1	4.4	4.5	5.9	0.0609929	0.0817891	99.0092	368.803	1	1	1	1	2	2	2	2	3	2	3.1	5.3	0.89	0.45	0.0248	2.17	-0.00286905
27558	ABR5_r3_f	ABR5	4731	BVZ0055	Wagga_Winter_future	Ch04	14B5	126.582	1	1	1.1	1.2	1.4	1.4	1.5	1.6	2.3	2.5	2.7	2.9	2.9	3.2	3.3	3.6	3.8	4.1	4.4	5.7	0.0601064	0.0832268	106.826	397.919	0	0	1	1	1	2	2	2	3	1.5	2.3	5	0.89	0.42	0.0229	2.29	-0.00277381
27312	Adi-1_r1_f	Adi-1	4735	BVZ0055	Wagga_Winter_future	Ch04	1B5	126.582	1	1	1.1	1.2	1.3	1.4	1.5	1.7	2	2.1	2.2	2.4	2.7	2.8	2.9	3.1	3.2	3.6	3.9	4.9	0.0514184	0.0664537	126.856	472.529	0	0	0	0	0	0	0	0	2	2.5	4.5	10	0.89	0.52	0.0158	2.07	-0.0020119
27369	Adi-1_r2_f	Adi-1	4735	BVZ0055	Wagga_Winter_future	Ch04	4B5	126.582	1	1	1	1.1	1.2	1.3	1.4	1.6	1.8	1.9	1.9	2.2	2.4	2.5	2.8	2.9	3.1	3.2	3.6	4.7	0.0446809	0.0755591	130.948	487.771	0	0	0	0	0	0	0	0	2	2.25	4.6	8.9	0.9	0.57	0.0263	3.03	0.00022619
27479	Adi-1_r3_f	Adi-1	4735	BVZ0055	Wagga_Winter_future	Ch04	10B2	126.582	1	1	1	1.1	1.2	1.3	1.4	1.6	2.1	2.2	2.3	2.5	2.7	2.9	3	3.2	3.5	3.8	3.9	5	0.0558511	0.065016	115.982	432.026	0	0	0	0	0	0	0	0	2	1.75	3.7	10.2	0.86	0.46	0.01075	1.52	-0.0020119
27495	Adi-1_r4_f	Adi-1	4735	BVZ0055	Wagga_Winter_future	Ch04	11A4	126.582	1	1	1	1	1.1	1.2	1.3	1.4	1.7	1.8	2.1	2.2	2.5	2.6	2.9	2.9	3.1	3.3	3.6	4.9	0.0374113	0.0832268	130.948	487.771	0	0	0	0	0	0	0	0	2	2.25	.	10.9	0.88	0.48	0.0181	1.94	-0.00115476
27328	Adi-15_r1_f	Adi-15	4732	BVZ0055	Wagga_Winter_future	Ch04	2B2	126.582	1	1	1	1	1	1	1.2	1.4	1.6	1.7	1.8	2.1	2.2	2.2	2.4	2.8	2.9	2.9	3.1	4.3	0.0326241	0.0741214	139.979	521.411	0	0	0	0	0	0	0	0	0	2.25	4.6	9.3	0.88	0.46	0.0149	1.92	-0.00152381
27360	Adi-15_r2_f	Adi-15	4732	BVZ0055	Wagga_Winter_future	Ch04	4A1	126.582	1.1	1.3	1.3	1.5	1.6	1.7	1.9	1.9	2.1	2.3	2.3	2.5	2.8	2.9	2.9	3.1	3.3	3.7	3.9	5.2	0.0455674	0.0797125	123.011	458.21	0	0	0	0	0	0	0	0	3	2.25	5.5	12.6	0.89	0.45	0.0173	1.99	-0.00255952
27564	Adi-15_r3_f	Adi-15	4732	BVZ0055	Wagga_Winter_future	Ch04	14D1	155.982	1	1	1	1	1	1	1	1	1.3	1.4	1.5	1.6	1.7	2.1	2.1	2.6	2.9	2.9	3	4.2	0.0111702	0.070607	129.841	493.701	0	0	0	0	0	0	0	0	0	2	4.3	9.8	0.89	0.48	0.0144	1.79	-0.00163095
27596	Adi-15_r4_f	Adi-15	4732	BVZ0055	Wagga_Winter_future	Ch04	16C1	126.582	1	1	1	1	1	1	1.1	1.2	1.5	1.6	1.8	2.1	2.2	2.2	2.5	2.9	2.9	3	3.1	4.4	0.0237589	0.0761981	139.979	521.411	0	0	0	0	0	0	0	0	1	2	4.7	10.6	0.89	0.46	0.02125	1.94	-0.00185714
27404	Adi-16_r1_f	Adi-16	4733	BVZ0055	Wagga_Winter_future	Ch04	6B2	126.582	1.2	1.3	1.5	1.6	1.7	1.8	1.9	2	2.1	2.3	2.4	2.6	2.8	2.8	3.1	3.3	3.5	3.9	4.1	5.2	0.0413121	0.0685304	115.982	432.026	0	0	0	0	1	1	2	2	3	2.25	4.7	10.1	0.86	0.41	0.0151	1.8	-0.0020119
27446	Adi-16_r2_f	Adi-16	4733	BVZ0055	Wagga_Winter_future	Ch04	8C2	126.582	1.3	1.4	1.5	1.7	1.8	1.9	2	2.1	2.3	2.5	2.6	2.8	2.9	3.1	3.2	3.5	3.8	4.2	4.2	5.3	0.0473404	0.0615016	106.826	397.919	0	0	0	0	0	1	1	2	3	2.5	4.4	10.5	0.86	0.43	0.0164	1.77	-0.00244048
27478	Adi-16_r3_f	Adi-16	4733	BVZ0055	Wagga_Winter_future	Ch04	10B1	126.582	1	1.1	1.3	1.4	1.5	1.6	1.7	1.8	2.1	2.2	2.3	2.5	2.6	2.8	2.9	3.1	3.3	3.6	3.9	4.9	0.0487589	0.0664537	123.011	458.21	0	0	0	0	0	1	1	2	2	2	3.9	9.2	0.88	0.45	0.01935	2.15	-0.00327381
27518	Adi-16_r4_f	Adi-16	4733	BVZ0055	Wagga_Winter_future	Ch04	12B3	126.582	1	1	1.1	1.2	1.3	1.4	1.5	1.7	2.1	2.1	2.2	2.5	2.7	2.9	2.9	3.1	3.2	3.6	3.8	5.1	0.0551418	0.0797125	126.856	472.529	0	0	0	0	0	0	0	0	2	2.25	4.4	10.5	0.84	0.46	0.01745	1.51	-0.00153571
27388	Adi-18_r1_f	Adi-18	4734	BVZ0055	Wagga_Winter_future	Ch04	5B5	139.981	1	1	1	1	1	1	1	1	1.1	1.1	1.1	1.1	1.2	1.2	1.3	1.4	2.1	2.3	2.6	3.9	0.0037234	0.0832268	186.923	706.409	0	0	0	0	0	0	0	0	1	2.25	3	7.7	0.87	0.32	0.01155	2.55	-0.00278571
27429	Adi-18_r2_f	Adi-18	4734	BVZ0055	Wagga_Winter_future	Ch04	7C4	126.582	1	1	1	1	1	1	1.1	1.3	1.4	1.6	2.1	2.3	2.5	2.5	2.7	3	3.2	3.7	3.9	5.3	0.0219858	0.0853035	126.856	472.529	1	1	1	1	1	1	1	1	3	2	3	9.3	0.87	0.45	0.0108	1.55	-0.00111905
27477	Adi-18_r3_f	Adi-18	4734	BVZ0055	Wagga_Winter_future	Ch04	10A5	126.582	1	1.1	1.1	1.2	1.4	1.5	1.7	1.8	2.1	2.3	2.5	2.7	2.9	2.9	3.1	33.2	3.4	3.7	4.1	5.2	0.0562057	0.0755591	119.393	444.733	0	0	0	0	0	1	1	1	3	2	5.2	11.6	0.89	0.47	0.0098	1.52	-0.00209524
27505	Adi-18_r4_f	Adi-18	4734	BVZ0055	Wagga_Winter_future	Ch04	11C4	139.981	1	1	1	1	1	1.1	1.2	1.4	2.1	2.3	2.6	2.9	2.9	2.9	2.9	3.1	3.1	3.4	3.6	5.3	0.0514184	0.102077	126.626	478.535	0	0	0	1	1	1	1	1	3	1.75	5.1	9.7	0.84	0.55	0.00725	0.78	-0.000821429
27363	Adi-6_r2_f	Adi-6	4736	BVZ0055	Wagga_Winter_future	Ch04	4A4	126.582	1	1.1	1.2	1.4	1.5	1.7	1.8	1.8	2.2	2.3	2.4	2.7	2.9	2.9	3.1	3.4	3.7	3.9	4.1	5.2	0.0562057	0.0685304	109.713	408.673	0	0	0	0	0	0	0	1	2	2.5	4.8	11	0.89	0.47	0.02105	2.5	-0.00227381
27390	Adi-6_r1_f	Adi-6	4736	BVZ0055	Wagga_Winter_future	Ch04	5C2	139.981	1	1.2	1.3	1.4	1.5	1.6	1.8	1.8	2.1	2.3	2.4	2.6	2.8	2.9	3.1	3.3	3.6	3.9	4	5.2	0.0469858	0.070607	109.039	412.072	0	0	0	0	0	0	0	0	2	2.75	4.5	11.9	0.87	0.42	0.01765	2.17	-0.00190476
27566	Adi-6_r3_f	Adi-6	4736	BVZ0055	Wagga_Winter_future	Ch04	14D3	139.981	1	1	1.2	1.3	1.6	1.7	1.8	1.9	2.2	2.3	2.5	2.7	2.8	2.9	3.1	3.4	3.6	3.9	4.1	5.3	0.0618794	0.0741214	109.039	412.072	0	0	0	0	0	0	0	0	3	2	4.9	13.1	0.88	0.46	0.0202	2.44	-0.00229762
27602	Adi-6_r4_f	Adi-6	4736	BVZ0055	Wagga_Winter_future	Ch04	16D2	126.582	1	1	1.1	1.2	1.4	1.6	1.7	1.8	2.1	2.1	2.2	2.5	2.6	2.8	2.9	3.1	3.3	3.7	3.9	5.1	0.0593972	0.0741214	123.011	458.21	0	0	0	0	0	0	0	0	1	2	5	12.1	0.89	0.45	0.0211	2.26	-0.00208333
27314	Adi-8_r1_f	Adi-8	4737	BVZ0055	Wagga_Winter_future	Ch04	1C2	139.981	1	1.1	1.2	1.4	1.6	1.7	1.7	1.9	2.1	2.3	2.3	2.5	2.6	2.8	3.1	3.3	3.5	3.9	4.1	5.2	0.0526596	0.0685304	112.154	423.845	0	0	0	0	0	0	0	0	2	2	4.3	9.8	0.84	0.45	0.01865	2.38	-0.00195238
27372	Adi-8_r2_f	Adi-8	4737	BVZ0055	Wagga_Winter_future	Ch04	4C3	126.582	1.2	1.3	1.5	1.7	1.8	1.9	2	2.1	2.3	2.4	2.6	2.8	2.9	3.1	3.3	3.7	3.9	4.1	4.2	5.6	0.0503546	0.0817891	104.087	387.716	0	0	0	0	0	0	1	1	2	2.25	4.4	11.8	0.84	0.43	0.0157	2.09	-0.00255952
27516	Adi-8_r4_f	Adi-8	4737	BVZ0055	Wagga_Winter_future	Ch04	12B1	126.582	1.5	1.6	1.7	1.9	1.9	1.9	2.1	2.2	2.5	2.7	2.7	3.1	3.2	3.3	3.6	3.9	4.1	4.3	4.6	6	0.0443262	0.0888179	99.0092	368.803	0	0	0	0	1	1	1	1	3	2.75	5.4	12.8	0.89	0.44	0.0183	2.57	-0.00275
27559	Adi-8_r3_f	Adi-8	4737	BVZ0055	Wagga_Winter_future	Ch04	14C1	139.981	1.2	1.3	1.5	1.7	1.8	1.9	1.9	2.1	2.3	2.4	2.6	2.8	2.9	3.1	3.4	3.8	3.9	4.1	4.3	5.7	0.0491135	0.0853035	100.651	380.374	0	0	0	0	0	0	0	0	3	2.5	5.5	10.5	0.89	0.49	0.0187	2.84	-0.00384524
27307	Ban1_r1_f	Ban1	4174	BVZ0055	Wagga_Winter_future	Ch04	1A5	155.982	1	1	1	1.1	1.3	1.3	1.5	1.6	2.1	2.1	2.2	2.3	2.5	2.6	2.8	3.1	3.3	3.6	3.9	4.9	0.0565603	0.0664537	114.103	433.858	0	0	0	1	1	1	1	2	2	2.25	3.8	7	0.89	0.42	0.0219	2.68	-0.0027619
27425	Ban1_r2_f	Ban1	4174	BVZ0055	Wagga_Winter_future	Ch04	7B5	155.982	1	1	1.1	1.2	1.4	1.5	1.6	1.8	2.1	2.2	2.3	2.5	2.6	2.9	3.1	3.3	3.5	3.9	3.9	4.9	0.0579787	0.0559105	107.582	409.067	0	0	0	1	1	1	1	2	3	2.25	4	7.5	0.88	0.44	0.023	2.17	-0.00157143
27482	Ban1_r3_f	Ban1	4174	BVZ0055	Wagga_Winter_future	Ch04	10B5	155.982	1	1	1	1.1	1.2	1.3	1.3	1.4	1.7	1.8	2.1	2.3	2.4	2.5	2.7	3.1	3.2	3.5	3.6	4.8	0.0358156	0.070607	117.668	447.417	0	0	0	0	1	1	1	1	2	2.25	4.3	7	0.88	0.41	0.03005	2.8	-0.0027381
27581	Ban1_r4_f	Ban1	4174	BVZ0055	Wagga_Winter_future	Ch04	15C5	155.982	1	1	1.1	1.3	1.4	1.5	1.7	1.7	2.2	2.4	2.5	2.7	2.9	2.9	3.1	3.4	3.6	3.9	4.1	5.2	0.0597518	0.0685304	104.594	397.704	0	0	1	1	1	1	2	2	3	2	4.1	9	0.87	0.42	0.0206	2.22	-0.00307143
27316	BAR1020_r1_f	BAR1020	4739	BVZ0055	Wagga_Winter_future	Ch04	1C4	139.981	1	1	1	1.1	1.2	1.3	1.3	1.5	1.7	1.8	1.9	2.1	2.2	2.3	2.5	2.8	2.9	3.1	3.3	4.4	0.037766	0.0685304	135.358	511.537	0	0	0	0	0	1	1	1	2	2.75	4.8	9	0.86	0.45	0.01995	2.41	-0.00129762
27349	BAR1020_r2_f	BAR1020	4739	BVZ0055	Wagga_Winter_future	Ch04	3B4	126.582	1	1	1.1	1.2	1.3	1.4	1.5	1.6	1.8	2.1	2.2	2.3	2.4	2.6	2.7	2.9	3.1	3.3	3.6	4.6	0.0420213	0.0664537	130.948	487.771	0	0	0	0	1	1	1	1	2	2.5	4.9	8.2	0.85	0.41	0.01495	1.95	-0.00152381
27460	BAR1020_r3_f	BAR1020	4739	BVZ0055	Wagga_Winter_future	Ch04	9B2	139.981	1	1	1	1.1	1.1	1.2	1.2	1.3	1.6	1.7	1.7	2.1	2.2	2.3	2.5	2.8	2.9	3.1	3.2	4.3	0.0292553	0.065016	135.358	511.537	0	0	0	0	0	0	1	1	2	2.25	5.2	10.2	0.87	0.43	0.01785	2.08	-0.00308333
27520	BAR1020_r4_f	BAR1020	4739	BVZ0055	Wagga_Winter_future	Ch04	12B5	139.981	1	1	1.1	1.3	1.4	1.5	1.6	1.7	2.1	2.2	2.3	2.4	2.5	2.7	2.9	3.1	3.2	3.5	3.8	4.9	0.0547872	0.0720447	122.668	463.581	0	0	0	1	1	1	1	1	3	1.75	3.3	11.1	0.88	0.47	0.02545	2.22	-0.00357143
27317	BD18-1_r1_f	BD18-1	4134	BVZ0055	Wagga_Winter_future	Ch04	1C5	126.582	1	1	1.1	1.2	1.3	1.4	1.6	1.7	2.2	2.3	2.5	2.8	2.9	3	3.2	3.6	3.9	3.9	4.1	5.3	0.0601064	0.0741214	104.087	387.716	0	0	0	0	0	0	0	0	2	1.75	2.7	6.6	0.87	0.44	0.01445	1.95	-0.00205952
27358	BD18-1_r2_f	BD18-1	4134	BVZ0055	Wagga_Winter_future	Ch04	3D3	126.582	1.1	1.2	1.3	1.4	1.5	1.7	2	2.1	2.4	2.5	2.7	2.9	3	3.1	3.3	3.8	3.9	4	4.1	4.3	0.0666667	0.0146965	104.087	387.716	0	0	0	0	0	0	0	1	2	2	2.9	7.2	0.86	0.44	0.0139	1.43	-0.00138095
27497	BD18-1_r4_f	BD18-1	4134	BVZ0055	Wagga_Winter_future	Ch04	11B1	139.981	1	1.1	1.3	1.4	1.5	1.6	1.7	2	2.3	2.5	2.7	2.9	2.9	3.1	3.3	3.7	3.9	4.1	4.1	5.3	0.0601064	0.0670927	100.651	380.374	0	0	0	0	0	0	1	1	2	2.5	4.2	8	0.89	0.44	0.01835	1.84	-0.00214286
27531	BD18-1_r3_f	BD18-1	4134	BVZ0055	Wagga_Winter_future	Ch04	13A2	139.981	1	1	1.1	1.1	1.3	1.4	1.5	1.6	2.1	2.3	2.5	2.7	2.9	2.9	3	3.2	3.5	3.9	3.9	5	0.0544326	0.0615016	112.154	423.845	0	0	0	0	0	0	0	0	2	1.5	3.1	7.9	0.88	0.45	0.016	1.63	-0.00195238
27323	BD21_r1_f	BD21	4741	BVZ0055	Wagga_Winter_future	Ch04	2A2	126.582	1	1.2	1.3	1.4	1.6	1.7	1.8	2	2.2	2.3	2.4	2.6	2.6	3	3.1	3.4	3.6	3.9	4.1	5.3	0.0542553	0.0741214	112.761	420.025	0	0	0	0	0	0	1	1	2	2.75	3.9	10.1	0.86	0.4	0.02255	2.66	-0.00371429
27342	BD21_r2_f	BD21	4741	BVZ0055	Wagga_Winter_future	Ch04	3A2	126.582	1.1	1.2	1.2	1.4	1.6	1.7	2	2.1	2.2	2.4	2.5	2.7	2.9	3.1	3.2	3.5	3.7	3.9	4.1	5.3	0.0609929	0.0741214	109.713	408.673	0	0	0	0	0	1	1	1	2	3	4.2	10.5	0.85	0.39	0.0173	2.28	-0.00239286
27400	BD21_r6_f	BD21	4741	BVZ0055	Wagga_Winter_future	Ch04	6A3	139.981	1	1	1.1	1.2	1.3	1.4	1.5	1.7	2	2.1	2.2	2.3	2.4	2.6	2.8	3.1	3.4	3.6	3.9	5.1	0.0514184	0.0776358	115.453	436.311	0	0	0	0	0	0	1	1	2	2.75	4.1	9.3	0.88	0.41	0.0236	2.86	-0.00322619
27467	BD21_r3_f	BD21	4741	BVZ0055	Wagga_Winter_future	Ch04	9C4	126.582	1	1	1.1	1.3	1.4	1.6	1.6	1.8	2.1	2.2	2.2	2.3	2.4	2.6	2.8	3.1	3.3	3.6	3.9	5	0.0569149	0.0720447	123.011	458.21	0	0	0	0	0	0	0	1	2	2.5	4.3	10.5	0.81	0.47	0.01595	1.64	-0.00047619
27524	BD21_r4_f	BD21	4741	BVZ0055	Wagga_Winter_future	Ch04	12C4	126.582	1.2	1.3	1.4	1.5	1.7	1.8	1.9	2.1	2.3	2.4	2.5	2.6	2.8	3.1	3.2	3.5	3.8	4	4.1	5.5	0.0542553	0.0817891	106.826	397.919	0	0	0	0	1	1	1	1	3	2.75	4.5	12.3	0.84	0.59	0.0107	1.38	-0.0019881
27562	BD21_r5_f	BD21	4741	BVZ0055	Wagga_Winter_future	Ch04	14C4	139.981	1	1.1	1.2	1.3	1.5	1.6	1.7	1.8	2.1	2.3	2.3	2.4	2.7	2.9	3	3.2	3.4	3.7	4	5.1	0.052305	0.0720447	115.453	436.311	0	0	0	0	0	0	1	1	2	2.5	4.5	11.1	0.84	0.41	0.02295	2.15	-0.00180952
27409	Bd21-3_r1_f	Bd21-3	4148	BVZ0055	Wagga_Winter_future	Ch04	6C2	126.582	1.4	1.5	1.6	1.8	1.9	1.9	2.1	2.2	2.4	2.5	2.6	2.8	3.2	3.2	3.4	3.7	3.9	4.1	4.4	5.7	0.0471631	0.0832268	104.087	387.716	0	0	0	0	0	1	1	1	2	2.75	4.8	15.1	0.86	0.37	0.01455	2.52	-0.00409524
27421	Bd21-3_r2_f	Bd21-3	4148	BVZ0055	Wagga_Winter_future	Ch04	7B1	126.582	1.6	1.7	1.8	1.9	1.9	1.9	2.1	2.2	2.5	2.5	2.7	3.1	3.3	3.4	3.5	3.9	4.1	4.3	4.6	5.9	0.0390071	0.0832268	99.0092	368.803	0	0	0	0	1	1	1	1	2	3	4.9	17	0.89	0.35	0.01685	3.29	-0.00577381
27491	Bd21-3_r3_f	Bd21-3	4148	BVZ0055	Wagga_Winter_future	Ch04	10D4	126.582	1.4	1.5	1.6	1.8	1.9	1.9	2.1	2.2	2.5	2.6	2.7	3.1	3.2	3.3	3.5	3.9	4.1	4.2	4.5	5	0.0508865	0.0384984	99.0092	368.803	0	0	0	0	0	1	1	1	2	2.75	4.8	15.6	0.86	0.45	0.0252	2.44	-0.00213095
27583	Bd21-3_r4_f	Bd21-3	4148	BVZ0055	Wagga_Winter_future	Ch04	15D2	126.582	1.4	1.6	1.7	1.9	1.9	1.9	2.1	2.3	2.6	2.8	3.1	3.1	3.3	3.5	3.7	3.9	4.1	4.4	4.8	5.2	0.05	0.0364217	99.0092	368.803	0	0	0	0	1	1	1	1	2	2.5	5	17	0.87	0.42	0.02815	2.87	-0.00271429
27415	BD3-1_r1_f	BD3-1	4743	BVZ0055	Wagga_Winter_future	Ch04	6D3	126.582	1.3	1.4	1.5	1.6	1.6	1.8	1.9	2.1	2.4	2.5	2.7	2.9	2.9	3.1	3.2	3.5	3.8	4.1	4.2	5.6	0.0519504	0.0817891	106.826	397.919	0	0	0	0	1	0	2	2	3	2.5	5.4	13.5	0.87	0.45	0.01755	1.56	-0.00135714
27437	BD3-1_r2_f	BD3-1	4743	BVZ0055	Wagga_Winter_future	Ch04	8A3	126.582	1	1.1	1.2	1.4	1.4	1.5	1.7	1.8	2.3	2.5	2.6	2.9	2.9	2.9	3.1	3.4	3.5	3.9	4.1	5.4	0.0588652	0.0797125	115.982	432.026	0	0	0	1	1	1	1	2	2	2.75	5.5	14	0.88	0.44	0.01795	1.95	-0.0017619
27554	BD3-1_r3_f	BD3-1	4743	BVZ0055	Wagga_Winter_future	Ch04	14B1	139.981	1.1	1.3	1.3	1.5	1.7	1.8	1.9	2	2.2	2.5	2.6	2.8	2.9	2.9	3.1	3.4	3.7	3.9	4.1	5.4	0.0508865	0.0797125	106.092	400.935	0	0	0	0	0	1	2	2	2	2.75	5.4	14.2	0.89	0.49	0.01835	1.76	-0.0019881
27571	BD3-1_r4_f	BD3-1	4743	BVZ0055	Wagga_Winter_future	Ch04	15A5	126.582	1.2	1.3	1.4	1.6	1.8	1.8	2	2.1	2.4	2.6	2.7	2.9	2.9	3.1	3.4	3.7	3.9	4.1	4.3	5.7	0.0574468	0.0853035	104.087	387.716	0	0	0	1	2	2	2	2	3	2.75	5.5	16.2	0.88	0.46	0.0209	1.95	-0.00178571
27321	Bd30-1_r1_f	Bd30-1	4744	BVZ0055	Wagga_Winter_future	Ch04	1D4	126.582	1	1	1.1	1.2	1.3	1.4	1.5	1.6	1.7	1.8	2.2	2.3	2.5	2.5	2.7	2.8	3.3	3.5	3.7	4.8	0.0382979	0.0685304	123.011	458.21	0	0	0	0	1	1	1	1	2	2	3.4	4.8	0.86	0.46	0.0199	1.88	-0.00219048
27449	Bd30-1_r2_f	Bd30-1	4744	BVZ0055	Wagga_Winter_future	Ch04	8C5	126.582	1	1	1	1.2	1.3	1.3	1.4	1.5	2.1	2.1	2.2	2.3	2.5	2.6	2.8	3.2	3.3	3.6	3.8	5.6	0.0521277	0.107668	123.011	458.21	0	0	0	0	1	1	1	1	2	2	4	6.2	0.88	0.48	0.0227	1.99	-0.00219048
27527	Bd30-1_r4_f	Bd30-1	4744	BVZ0055	Wagga_Winter_future	Ch04	12D2	126.582	1	1	1.1	1.2	1.4	1.4	1.6	1.6	2.2	2.3	2.4	2.6	2.7	2.8	3.1	3.2	3.4	3.6	3.8	5	0.0576241	0.0741214	119.393	444.733	0	0	0	1	1	1	1	2	3	2	4.2	7.9	0.86	0.45	0.02095	1.8	-0.00234524
27549	Bd30-1_r3_f	Bd30-1	4744	BVZ0055	Wagga_Winter_future	Ch04	14A1	126.582	1	1	1	1.2	1.2	1.3	1.4	1.6	2.1	2.1	2.1	2.3	2.5	2.5	2.7	2.9	3.2	3.5	3.6	4.8	0.0546099	0.070607	126.856	472.529	0	0	0	0	1	1	1	1	2	2	3.7	5.4	0.87	0.45	0.0288	2.23	-0.00267857
27327	Bdis05-7_r1_f	Bdis05-7	4747	BVZ0055	Wagga_Winter_future	Ch04	2B1	126.582	1	1	1	1.1	1.2	1.3	1.3	1.5	1.7	1.8	2.1	2.1	2.3	2.4	2.5	2.8	3.1	3.3	3.5	4.7	0.037766	0.0741214	130.948	487.771	0	0	0	0	1	1	1	1	2	2.25	3	5.6	0.88	0.41	0.0167	2.36	-0.00188095
27426	Bdis05-7_r2_f	Bdis05-7	4747	BVZ0055	Wagga_Winter_future	Ch04	7C1	139.981	1	1	1	1.1	1.2	1.3	1.3	1.5	1.6	2.2	2.2	2.4	2.5	2.7	3.1	3.2	3.5	3.8	4.1	5.1	0.0340426	0.0664537	112.154	423.845	0	0	0	1	1	1	1	2	3	2.25	3.3	6.7	0.89	0.45	0.0188	2.35	-0.00210714
27509	Bdis05-7_r4_f	Bdis05-7	4747	BVZ0055	Wagga_Winter_future	Ch04	11D3	126.582	1	1	1.1	1.2	1.3	1.5	1.6	1.7	2.1	2.2	2.3	2.5	2.6	2.8	3.1	3.2	3.5	3.8	3.9	5.1	0.0565603	0.070607	115.982	432.026	0	0	0	1	1	1	1	2	3	2	3.9	8.1	0.84	0.47	0.0162	1.36	-0.00147619
27545	Bdis05-7_r3_f	Bdis05-7	4747	BVZ0055	Wagga_Winter_future	Ch04	13D1	139.981	1	1	1	1.2	1.3	1.5	1.5	1.7	2.1	2.2	2.3	2.4	2.5	2.6	3.1	3.3	3.5	3.8	4.1	5.1	0.0576241	0.0664537	112.154	423.845	0	0	0	1	1	1	1	2	3	2	3.5	7	0.87	0.43	0.02495	2.2	-0.00214286
27403	Bdis05-9_r1_f	Bdis05-9	4748	BVZ0055	Wagga_Winter_future	Ch04	6B1	155.982	0	0	0	1	1.2	1.2	1.2	1.3	1.3	1.3	2.1	2.1	2.4	2.4	2.5	3.1	3.1	3.5	3.7	3.8	0.0176923	0.0126198	121.464	461.849	0	0	0	0	0	0	0	0	1	2.5	3.3	4.4	0.89	0.43	0.01655	2.93	-0.00360714
27427	Bdis05-9_r2_f	Bdis05-9	4748	BVZ0055	Wagga_Winter_future	Ch04	7C2	139.981	1	1	1	1.1	1.1	1.2	1.3	1.4	1.7	1.8	1.8	2.1	2.3	2.3	2.5	2.9	3.1	3.2	3.5	4.5	0.0361702	0.0664537	126.626	478.535	0	0	0	0	0	1	1	1	2	2.5	3.5	6.4	0.86	0.43	0.0194	2.09	-0.00197619
27486	Bdis05-9_r3_f	Bdis05-9	4748	BVZ0055	Wagga_Winter_future	Ch04	10C4	139.981	0	0	1	1	1	1	1	1	1	1	1	1	1	1	1.5	1.8	2.1	2.5	2.7	3.9	0	0.0741214	186.923	706.409	0	0	0	0	0	0	0	0	0	.	.	2.9	.	.	.	.	.
27511	Bdis05-9_r4_f	Bdis05-9	4748	BVZ0055	Wagga_Winter_future	Ch04	12A1	187.192	1	1	1	1.1	1.2	1.3	1.5	1.5	1.8	1.9	2.1	2.1	2.3	2.4	2.7	2.9	3.1	3.3	3.5	4.6	0.0439716	0.0685304	111.396	428.674	0	0	0	0	0	0	0	0	2	2	3.5	6.8	0.89	0.42	0.0221	2.2	-0.00305952
27398	Bdis22-1_r1_f	Bdis22-1	4749	BVZ0055	Wagga_Winter_future	Ch04	6A1	126.582	1	1	1.1	1.4	1.4	1.5	1.6	1.6	2.3	2.5	2.6	2.8	2.8	3.2	3.3	3.8	3.9	4.2	4.4	5.6	0.0590426	0.0741214	104.087	387.716	0	1	1	1	1	2	2	2	3	1.75	3	4.6	0.87	0.39	0.0221	2.65	-0.0029881
27417	Bdis22-1_r2_f	Bdis22-1	4749	BVZ0055	Wagga_Winter_future	Ch04	7A2	126.582	1	1	1.1	1.2	1.2	1.3	1.4	1.4	2.1	2.2	2.5	2.7	2.9	2.9	3.2	3.6	3.8	3.9	4.1	5.2	0.0484043	0.0685304	106.826	397.919	0	0	1	1	1	1	2	2	3	2	3.2	6.4	0.89	0.39	0.02595	3.15	-0.0037619
27523	Bdis22-1_r4_f	Bdis22-1	4749	BVZ0055	Wagga_Winter_future	Ch04	12C3	126.582	1	1	1.1	1.2	1.3	1.4	1.5	1.6	2.1	2.2	2.3	2.6	2.7	2.9	3.1	3.3	3.6	3.9	4.1	5.1	0.0531915	0.0629393	112.761	420.025	0	0	0	1	1	1	2	2	3	2.25	5.3	7.1	0.85	0.42	0.02175	1.97	-0.00135714
27541	Bdis22-1_r3_f	Bdis22-1	4749	BVZ0055	Wagga_Winter_future	Ch04	13C2	139.981	1	1	1.1	1.1	1.3	1.4	1.5	1.6	2.1	2.2	2.4	2.6	2.7	2.9	3.1	3.5	3.7	3.9	4.1	5.3	0.0544326	0.0741214	106.092	400.935	0	0	0	1	1	1	2	2	3	2	3.1	6.4	0.88	0.45	0.0293	2.59	-0.0024881
27410	Bdis22-5_r1_f	Bdis22-5	4750	BVZ0055	Wagga_Winter_future	Ch04	6C3	139.981	1	1	1.1	1.2	1.3	1.3	1.5	1.6	2	2.1	2.1	2.3	2.6	2.7	2.8	3.1	3.4	3.6	3.8	4.9	0.0492908	0.0685304	115.453	436.311	0	0	0	0	1	1	1	1	3	2.25	3.5	5.2	0.83	0.43	0.0136	1.41	-0.0017381
27453	Bdis22-5_r2_f	Bdis22-5	4750	BVZ0055	Wagga_Winter_future	Ch04	8D4	139.981	1	1	1	1.3	1.3	1.4	1.6	1.6	2.2	2.4	2.5	2.7	2.8	2.9	3.1	3.4	3.6	3.9	4.1	5.2	0.0592199	0.0685304	109.039	412.072	0	0	0	0	1	1	2	2	3	2.25	3.5	6.3	0.87	0.44	0.0206	2.08	-0.0019881
27503	Bdis22-5_r4_f	Bdis22-5	4750	BVZ0055	Wagga_Winter_future	Ch04	11C2	126.582	1	1	1.1	1.3	1.4	1.5	1.6	1.7	2.1	2.3	2.4	2.6	2.8	2.9	3.1	3.3	3.6	3.9	4.1	5.3	0.0547872	0.0741214	112.761	420.025	0	0	0	1	1	1	2	2	3	2	3.6	7	0.85	0.43	0.0168	1.6	-0.00221429
27555	Bdis22-5_r3_f	Bdis22-5	4750	BVZ0055	Wagga_Winter_future	Ch04	14B2	155.982	1	1	1.1	1.2	1.3	1.4	1.5	1.6	2.1	2.1	2.3	2.4	2.6	2.8	2.9	3.2	3.4	3.7	3.9	5.1	0.0531915	0.0741214	110.747	421.098	0	0	0	1	1	1	1	2	3	2.25	3.3	6.3	0.87	0.45	0.02065	1.92	-0.00270238
27387	Bdis22-6_r1_f	Bdis22-6	4751	BVZ0055	Wagga_Winter_future	Ch04	5B4	139.981	1	1	1	1.1	1.2	1.3	1.4	1.5	1.7	2.1	2.1	2.3	2.5	2.6	2.8	3.1	3.2	3.5	3.6	4.8	0.0390071	0.070607	122.668	463.581	0	0	0	0	1	1	1	1	2	2	3.8	5.5	0.89	0.43	0.02315	3.96	-0.000845238
27424	Bdis22-6_r2_f	Bdis22-6	4751	BVZ0055	Wagga_Winter_future	Ch04	7B4	126.582	1	1	1.1	1.1	1.2	1.3	1.3	1.5	2.1	2.2	2.3	2.5	2.7	2.9	3.1	3.2	3.4	3.7	3.9	4.9	0.0503546	0.0629393	119.393	444.733	0	0	0	1	1	1	1	2	3	2	3.6	6	0.87	0.46	0.02035	1.66	-0.00210714
27457	Bdis22-6_r3_f	Bdis22-6	4751	BVZ0055	Wagga_Winter_future	Ch04	9A4	126.582	1	1.1	1.2	1.3	1.5	1.6	1.6	1.8	2.2	2.3	2.5	2.7	2.8	2.9	3.1	3.4	3.6	3.9	4.1	5.3	0.0547872	0.0741214	112.761	420.025	0	0	0	1	1	1	2	2	3	2	3.4	6.7	0.85	0.43	0.01385	1.52	-0.00160714
27508	Bdis22-6_r4_f	Bdis22-6	4751	BVZ0055	Wagga_Winter_future	Ch04	11D2	126.582	1	1	1.1	1.2	1.3	1.4	1.5	1.6	2.1	2.2	2.3	2.5	2.6	2.8	3.1	3.2	3.5	3.7	4.1	5.1	0.0531915	0.0699681	115.982	432.026	0	0	0	1	1	1	2	2	3	1.75	4	7.2	0.86	0.42	0.01665	1.65	-0.00219048
27376	Bdis23-1_r2_f	Bdis23-1	4753	BVZ0055	Wagga_Winter_future	Ch04	4D2	126.582	1	1	1.1	1.3	1.3	1.5	1.5	1.6	2.1	2.2	2.3	2.5	2.7	2.8	3.1	3.3	3.5	3.7	3.9	4.9	0.0521277	0.0629393	115.982	432.026	0	0	0	1	1	1	1	2	3	2.25	4	6.5	0.86	0.4	0.01755	1.41	-0.00139286
27407	Bdis23-1_r1_f	Bdis23-1	4753	BVZ0055	Wagga_Winter_future	Ch04	6B5	126.582	1	1	1.1	1.2	1.3	1.3	1.4	1.6	2.1	2.2	2.3	2.5	2.7	2.8	2.9	3.2	3.4	3.7	3.8	4.9	0.051773	0.065016	119.393	444.733	0	0	0	1	1	1	1	2	3	2	4.1	6.5	0.88	0.47	0.02305	3.84	-0.00232143
27539	Bdis23-1_r3_f	Bdis23-1	4753	BVZ0055	Wagga_Winter_future	Ch04	13B5	139.981	1	1	1	1.1	1.2	1.2	1.4	1.5	1.7	2.1	2.1	2.2	2.4	2.5	2.8	2.9	3.1	3.5	3.7	4.9	0.0388298	0.0741214	126.626	478.535	0	0	0	0	1	1	1	1	2	2	3.7	6.4	0.89	0.42	0.02915	2.44	-0.00394048
27600	Bdis23-1_r4_f	Bdis23-1	4753	BVZ0055	Wagga_Winter_future	Ch04	16C5	139.981	1	1	1.2	1.3	1.4	1.5	1.6	1.8	2.1	2.3	2.4	2.6	2.8	2.9	3.1	3.5	3.7	3.9	4.1	5.3	0.0544326	0.0741214	106.092	400.935	0	0	1	1	1	1	2	2	3	2.25	4.2	8.5	0.86	0.45	0.0178	1.55	-0.0027381
27315	Bdis23-2_r1_f	Bdis23-2	4754	BVZ0055	Wagga_Winter_future	Ch04	1C3	155.982	1	1	1	1	1.1	1.2	1.3	1.4	1.6	1.7	2.1	2.2	2.4	2.5	2.7	3.1	3.2	3.5	3.7	4.8	0.0336879	0.0685304	117.668	447.417	0	0	0	0	1	1	1	1	2	2	3.3	4.3	0.81	0.43	0.0167	1.71	-0.00194048
27361	Bdis23-2_r2_f	Bdis23-2	4754	BVZ0055	Wagga_Winter_future	Ch04	4A2	126.582	1	1	1	1.1	1.2	1.3	1.4	1.5	1.8	2.1	2.2	2.3	2.5	2.6	2.7	3.2	3.4	3.6	3.8	4.9	0.0427305	0.0685304	119.393	444.733	0	0	0	1	1	1	1	2	2	2.25	3.4	4.7	0.89	0.43	0.02105	2.59	-0.00309524
27488	Bdis23-2_r3_f	Bdis23-2	4754	BVZ0055	Wagga_Winter_future	Ch04	10D1	139.981	1	1	1	1	1.1	1.2	1.3	1.3	1.5	1.5	2.1	2.2	2.4	2.5	2.7	3.1	3.3	3.6	3.8	5.1	0.0280142	0.0797125	118.951	449.533	0	0	0	0	1	1	1	2	3	2	2.9	4.9	0.85	0.42	0.01985	2.02	-0.00182143
27577	Bdis23-2_r4_f	Bdis23-2	4754	BVZ0055	Wagga_Winter_future	Ch04	15C1	126.582	1	1	1.1	1.2	1.2	1.4	1.5	1.6	2.1	2.2	2.3	2.5	2.6	2.8	3.1	3.4	3.6	3.9	4.1	5.3	0.0537234	0.0741214	112.761	420.025	0	0	1	1	1	1	2	2	3	2	3.5	6.7	0.88	0.44	0.02485	2.52	-0.00319048
27338	Bdis23-5_r1_f	Bdis23-5	4755	BVZ0055	Wagga_Winter_future	Ch04	2D2	126.582	1	1	1	1.1	1.2	1.3	1.4	1.6	2.1	2.3	2.4	2.6	2.8	2.8	3.1	3.5	3.7	3.9	4.1	5.4	0.0558511	0.0797125	109.713	408.673	0	0	0	0	1	1	1	2	3	2	2.8	4.6	0.85	0.44	0.02185	1.99	-0.00229762
27419	Bdis23-5_r2_f	Bdis23-5	4755	BVZ0055	Wagga_Winter_future	Ch04	7A4	139.981	1	1	1.1	1.2	1.2	1.3	1.4	1.5	2.1	2.3	2.5	2.7	2.8	2.9	3.2	3.6	3.7	4.1	4.2	5.3	0.0503546	0.065016	106.092	400.935	0	0	1	1	1	1	1	2	3	2.25	3.1	4.8	0.88	0.42	0.0172	2.11	-0.00207143
27487	Bdis23-5_r3_f	Bdis23-5	4755	BVZ0055	Wagga_Winter_future	Ch04	10C5	126.582	1	1	1.1	1.1	1.2	1.3	1.4	1.5	2.1	2.2	2.3	2.5	2.6	2.8	3.1	3.5	3.7	3.9	4.2	5.3	0.0515957	0.0720447	109.713	408.673	0	0	0	0	1	1	1	2	3	2	3	4	0.86	0.43	0.02005	2.03	-0.00280952
27517	Bdis23-5_r4_f	Bdis23-5	4755	BVZ0055	Wagga_Winter_future	Ch04	12B2	139.981	1	1	1	1.1	1.2	1.2	1.3	1.4	2.1	2.1	2.2	2.4	2.6	2.8	2.9	3.2	3.4	3.7	3.9	5	0.0505319	0.0685304	115.453	436.311	0	0	0	0	1	1	1	2	3	1.75	3.2	5.5	0.89	0.46	0.02485	2.19	-0.00303571
27322	Bdis25-04_r1_f	Bdis25-04	4757	BVZ0055	Wagga_Winter_future	Ch04	2A1	126.582	1	1.1	1.2	1.3	1.4	1.6	1.7	1.7	2.3	2.5	2.6	3.1	2.9	3.1	3.2	3.6	3.8	4.1	4.2	5.4	0.0583333	0.070607	106.826	397.919	1	1	1	1	1	2	2	2	3	2.25	3.9	6.8	0.89	0.38	0.02245	2.91	-0.00310714
27368	Bdis25-04_r2_f	Bdis25-04	4757	BVZ0055	Wagga_Winter_future	Ch04	4B4	126.582	1	1	1.1	1.3	1.5	1.6	1.7	1.8	2.2	2.3	2.4	2.6	2.7	2.9	3.1	3.4	3.6	3.8	3.9	5.1	0.0613475	0.070607	112.761	420.025	0	0	0	1	1	1	1	2	3	2.25	4.4	8.4	0.87	0.49	0.02165	2.04	-0.00139286
27493	Bdis25-04_r4_f	Bdis25-04	4757	BVZ0055	Wagga_Winter_future	Ch04	11A2	126.582	1	1.1	1.2	1.3	1.5	1.6	1.7	1.8	2.3	2.4	2.6	2.7	2.8	2.9	3.2	3.6	3.7	3.9	4.2	5.2	0.0597518	0.0664537	109.713	408.673	0	0	1	1	1	1	2	2	3	2.25	3.7	7.6	0.88	0.43	0.02405	2.59	-0.00289286
27530	Bdis25-04_r3_f	Bdis25-04	4757	BVZ0055	Wagga_Winter_future	Ch04	13A1	139.981	1	1.1	1.3	1.4	1.5	1.6	1.7	1.8	2.3	2.5	2.6	2.8	2.9	3.1	3.3	3.6	3.8	4.1	4.3	5.4	0.0562057	0.0685304	103.3	390.384	0	0	0	0	1	1	2	2	3	2.25	4.1	7.7	0.89	0.42	0.026	2.63	-0.00303571
27356	Bdis25-1_r2_f	Bdis25-1	4756	BVZ0055	Wagga_Winter_future	Ch04	3D1	126.582	1	1	1.2	1.3	1.4	1.5	1.6	1.6	2.3	2.5	2.6	2.7	2.8	3.2	3.3	3.6	3.8	4.1	4.3	5.6	0.0579787	0.0797125	106.826	397.919	0	0	1	1	1	2	2	2	3	2.25	3.1	4.6	0.87	0.39	0.0225	2.33	-0.00264286
27405	Bdis25-1_r1_f	Bdis25-1	4756	BVZ0055	Wagga_Winter_future	Ch04	6B3	126.582	1	1	1	1.1	1.2	1.3	1.4	1.5	2.2	2.2	2.3	2.5	2.6	2.8	3.1	3.3	3.5	3.9	4.1	5.2	0.0576241	0.0685304	115.982	432.026	0	0	0	0	1	1	1	2	3	2.25	3.1	4.9	0.85	0.42	0.02215	2.12	-0.00103571
27496	Bdis25-1_r4_f	Bdis25-1	4756	BVZ0055	Wagga_Winter_future	Ch04	11A5	126.582	1	1	1.1	1.2	1.4	1.5	1.6	1.6	2.1	2.3	2.4	2.6	2.7	2.8	3.2	3.5	3.7	4.1	4.2	4.5	0.054078	0.0202875	109.713	408.673	0	0	0	0	0	1	1	1	2	2.75	3.9	5.9	0.89	0.34	0.0277	2.92	-0.00339286
27547	Bdis25-1_r3_f	Bdis25-1	4756	BVZ0055	Wagga_Winter_future	Ch04	13D3	139.981	1	1	1	1.1	1.1	1.2	1.3	1.4	1.6	2.1	2.1	2.3	2.6	2.7	2.8	3.2	3.5	3.7	4.1	5.2	0.0324468	0.0755591	112.154	423.845	0	0	0	0	0	0	0	1	2	2.25	4.1	5.8	0.87	0.43	0.02935	2.43	-0.00272619
27313	Bdis25-10_r1_f	Bdis25-10	4760	BVZ0055	Wagga_Winter_future	Ch04	1C1	139.981	1	1	1	1.1	1.1	1.2	1.3	1.4	1.6	1.7	2.1	2.2	2.4	2.5	2.6	2.9	3.1	3.4	3.6	4.7	0.0324468	0.0685304	126.626	478.535	0	0	0	0	0	0	1	1	2	2.25	3.9	6.2	0.86	0.41	0.0229	2.54	-0.003
27441	Bdis25-10_r2_f	Bdis25-10	4760	BVZ0055	Wagga_Winter_future	Ch04	8B2	126.582	1	1	1	1.1	1.2	1.3	1.4	1.5	2.1	2.1	2.2	2.3	2.6	2.7	2.8	3.1	3.3	3.6	3.8	4.8	0.0539007	0.0629393	123.011	458.21	0	0	0	0	1	1	1	1	2	2	4.5	7.1	0.88	0.39	0.02455	2.9	-0.00317857
27475	Bdis25-10_r3_f	Bdis25-10	4760	BVZ0055	Wagga_Winter_future	Ch04	10A3	126.582	1	1	1.1	1.2	1.3	1.3	1.4	1.6	1.7	2.1	2.2	2.3	2.5	2.6	2.8	3.1	3.3	3.5	3.7	4.9	0.0368794	0.0741214	123.011	458.21	0	0	0	0	0	1	1	2	2	2	4.2	7.3	0.86	0.41	0.0236	2.73	-0.00341667
27576	Bdis25-10_r4_f	Bdis25-10	4760	BVZ0055	Wagga_Winter_future	Ch04	15B5	126.582	1	1	1.1	1.2	1.3	1.4	1.5	1.6	2.1	2.3	2.4	2.6	2.8	2.9	3.1	3.4	3.5	3.8	3.9	5.1	0.0531915	0.070607	115.982	432.026	0	0	0	1	1	1	1	2	3	2	4.8	9.3	0.86	0.39	0.0263	2.86	-0.00357143
27308	Bdis25-5_r1_f	Bdis25-5	4758	BVZ0055	Wagga_Winter_future	Ch04	1B1	139.981	1	1	1.2	1.3	1.4	1.5	1.6	1.7	2.2	2.3	2.4	2.6	2.8	2.9	3.1	3.3	3.5	3.8	4.1	5.1	0.0562057	0.0664537	112.154	423.845	0	0	0	1	1	1	2	2	3	2.25	3.9	7.2	0.89	0.41	0.0239	2.68	-0.00239286
27375	Bdis25-5_r2_f	Bdis25-5	4758	BVZ0055	Wagga_Winter_future	Ch04	4D1	126.582	1.1	1.2	1.3	1.5	1.6	1.7	1.8	2.1	2.3	2.5	2.7	2.9	2.9	3.1	3.2	3.5	3.6	3.9	4.1	5.1	0.0586879	0.0629393	112.761	420.025	0	0	0	0	1	1	2	2	3	2.25	5	8.7	0.9	0.43	0.0216	2.11	-0.00283333
27529	Bdis25-5_r4_f	Bdis25-5	4758	BVZ0055	Wagga_Winter_future	Ch04	12D4	126.582	1	1.2	1.3	1.4	1.5	1.6	1.7	1.7	2.4	2.5	2.7	2.9	2.9	3.1	3.2	3.6	3.8	4.1	4.1	5.3	0.0549645	0.0670927	106.826	397.919	0	0	1	1	1	2	2	2	3	2	4.7	9.1	0.86	0.42	0.02055	1.71	-0.0025
27546	Bdis25-5_r3_f	Bdis25-5	4758	BVZ0055	Wagga_Winter_future	Ch04	13D2	126.582	1	1	1.1	1.3	1.5	1.5	1.6	1.8	2.2	2.4	2.5	2.7	2.8	2.9	3.1	3.3	3.5	3.8	3.9	5.1	0.0599291	0.070607	115.982	432.026	0	0	0	1	1	1	2	2	3	2	4.3	8.3	0.88	0.43	0.02535	2.35	-0.00264286
27352	Bdis28-8_r2_f	Bdis28-8	4762	BVZ0055	Wagga_Winter_future	Ch04	3C2	126.582	1	1	1.1	1.3	1.3	1.4	1.6	1.7	2.2	2.3	2.5	2.7	2.8	2.9	3.1	3.3	3.5	3.8	4.1	5.2	0.0588652	0.0720447	115.982	432.026	0	0	0	0	1	1	1	2	3	2.5	3.3	8.3	0.85	0.42	0.01695	1.86	-0.00182143
27402	Bdis28-8_r1_f	Bdis28-8	4762	BVZ0055	Wagga_Winter_future	Ch04	6A5	139.981	1	1	1	1.1	1.2	1.3	1.3	1.6	2.1	2.3	2.3	2.6	2.8	2.9	3.1	3.3	3.6	3.9	4.1	5.2	0.0546099	0.0685304	109.039	412.072	0	0	0	1	1	1	1	1	3	2.5	3.9	7.3	0.88	0.37	0.0185	2.81	-0.00678571
27465	Bdis28-8_r3_f	Bdis28-8	4762	BVZ0055	Wagga_Winter_future	Ch04	9C2	139.981	1	1	1	1.1	1.2	1.3	1.4	1.5	2.1	2.1	2.2	2.4	2.6	2.7	2.9	3.1	3.3	3.6	3.8	4.9	0.0539007	0.0685304	118.951	449.533	0	0	0	0	0	1	1	1	2	2	3.7	7.4	0.86	0.45	0.0197	2.26	-0.00302381
27598	Bdis28-8_r4_f	Bdis28-8	4762	BVZ0055	Wagga_Winter_future	Ch04	16C3	139.981	1	1	1.1	1.2	1.3	1.5	1.6	1.7	2.1	2.4	2.5	2.7	2.9	2.9	3.1	3.5	3.7	3.9	4.1	5.3	0.0565603	0.0741214	106.092	400.935	0	0	1	1	1	1	2	2	3	2	4	8.9	0.81	0.42	0.0161	1.28	-0.00238095
27330	Bdis31-1_r1_f	Bdis31-1	4763	BVZ0055	Wagga_Winter_future	Ch04	2B4	126.582	1	1	1	1	1.2	1.2	1.3	1.4	2.1	2.2	2.3	2.4	2.6	2.7	2.9	3.1	3.2	3.5	3.8	4.8	0.051773	0.0664537	126.856	472.529	0	0	1	1	1	1	1	2	2	2.5	4.2	6.8	0.81	0.39	0.0168	1.75	-0.00283333
27378	Bdis31-1_r2_f	Bdis31-1	4763	BVZ0055	Wagga_Winter_future	Ch04	4D4	126.582	1	1	1	1.1	1.2	1.3	1.4	1.6	2.1	2.2	2.3	2.5	2.6	2.7	2.9	3.1	3.2	3.5	3.7	4.6	0.0558511	0.0573482	126.856	472.529	0	0	0	1	1	1	1	2	2	2.5	4.8	7.1	0.85	0.4	0.0177	2.19	-0.0029881
27485	Bdis31-1_r3_f	Bdis31-1	4763	BVZ0055	Wagga_Winter_future	Ch04	10C3	126.582	1	1	1	1	1.1	1.1	1.1	1.1	1.3	1.5	2.1	2.1	2.2	2.2	2.3	2.7	3.1	3.5	3.8	4.9	0.0140071	0.0720447	130.948	487.771	1	1	1	1	2	2	2	2	3	2.5	2.1	5.1	0.78	0.37	0.0133	1.65	-0.00304762
27525	Bdis31-1_r4_f	Bdis31-1	4763	BVZ0055	Wagga_Winter_future	Ch04	12C5	126.582	1	1	1	1.1	1.2	1.3	1.4	1.5	1.7	2.1	2.2	2.4	2.6	2.8	2.9	3.1	3.3	3.7	3.9	4.9	0.0390071	0.0629393	123.011	458.21	0	0	0	1	1	1	2	2	3	2.25	4.4	8.4	0.85	0.41	0.02305	2.3	-0.0027619
27389	Bdis31-2_r1_f	Bdis31-2	4764	BVZ0055	Wagga_Winter_future	Ch04	5C1	155.982	1	1	1	1	1	1	1.1	1.2	1.4	1.6	1.6	2.1	2.1	2.2	2.3	2.6	2.7	3.1	3.3	4.3	0.0200355	0.0629393	139.459	530.271	0	0	0	0	1	1	1	1	2	2.75	3.6	5.7	0.89	0.41	0.02055	2.51	-0.00286905
27436	Bdis31-2_r2_f	Bdis31-2	4764	BVZ0055	Wagga_Winter_future	Ch04	8A2	155.982	1	1	1	1	1	1.1	1.2	1.3	1.6	1.7	1.8	2.1	2.2	2.2	2.3	2.6	2.8	3.1	3.3	4.4	0.0308511	0.0685304	134.478	511.333	0	0	0	0	0	1	1	1	2	2.5	3.5	6	0.89	0.41	0.01835	2.4	-0.00232143
27481	Bdis31-2_r3_f	Bdis31-2	4764	BVZ0055	Wagga_Winter_future	Ch04	10B4	126.582	1	1	1	1	1	1	1.1	1.2	1.3	1.4	1.4	1.5	1.6	2.1	2.2	2.3	2.7	3.1	3.1	4.3	0.0163121	0.0670927	150.347	560.034	0	0	0	0	0	0	1	1	2	2.5	3.7	6.1	0.87	0.45	0.0174	2.05	-0.00127381
27514	Bdis31-2_r4_f	Bdis31-2	4764	BVZ0055	Wagga_Winter_future	Ch04	12A4	155.982	1	1	1	1.1	1.1	1.2	1.2	1.3	1.5	2.6	2.1	2.2	2.3	2.4	2.6	2.8	3.1	3.5	3.5	4.6	0.0255319	0.0615016	121.464	461.849	0	0	0	0	1	0	1	1	2	2.5	4.5	7.2	0.88	0.44	0.0236	2.33	-0.00278571
27408	Bdis32-2_r1_f	Bdis32-2	4765	BVZ0055	Wagga_Winter_future	Ch04	6C1	139.981	1	1	1	1.1	1.1	1.2	1.3	1.4	1.6	1.6	2.1	2.3	2.4	2.5	2.7	2.9	3.1	3.3	3.6	4.6	0.0324468	0.0664537	126.626	478.535	0	0	0	1	1	1	1	1	2	2.25	3.2	4.7	0.89	0.42	0.0183	2.16	-0.00241667
27447	Bdis32-2_r2_f	Bdis32-2	4765	BVZ0055	Wagga_Winter_future	Ch04	8C3	155.982	1	1	1	1	1	1.1	1.1	1.3	1.5	1.7	1.7	2.1	2.2	2.3	2.5	2.8	2.9	3.2	3.4	4.5	0.0258865	0.0685304	129.841	493.701	0	0	0	0	1	1	1	1	2	2.5	3.5	5.7	0.83	0.44	0.0144	1.35	-0.00136905
27464	Bdis32-2_r3_f	Bdis32-2	4765	BVZ0055	Wagga_Winter_future	Ch04	9C1	139.981	1	1	1	1	1.1	1.2	1.2	1.3	1.6	1.7	1.7	2.1	2.3	2.3	2.5	2.9	2.9	3.1	3.3	4.5	0.0304965	0.0741214	135.358	511.537	0	0	0	0	0	1	1	1	2	2	3.6	6.2	0.9	0.47	0.0215	2.37	-0.0032619
27526	Bdis32-2_r4_f	Bdis32-2	4765	BVZ0055	Wagga_Winter_future	Ch04	12D1	126.582	1	1	1.1	1.1	1.2	1.3	1.4	1.5	2.1	2.1	2.2	2.4	2.6	2.7	2.9	3.1	3.3	3.6	3.8	5.1	0.0515957	0.0797125	123.011	458.21	0	0	0	1	1	1	1	2	3	2.25	4	6.9	0.89	0.44	0.02445	2.51	-0.00266667
27303	BdTR10c_r1_f	BdTR10c	4766	BVZ0055	Wagga_Winter_future	Ch04	1A1	126.582	1.1	1.3	1.4	1.5	1.6	1.8	1.9	2	2.2	2.3	2.5	2.7	2.9	2.9	3.1	3.4	3.6	3.9	4.1	5.2	0.0491135	0.0685304	112.761	420.025	0	0	0	0	1	1	2	2	3	2.5	4.4	9.3	0.88	0.42	0.0209	2.33	-0.00245238
27431	BdTR10c_r2_f	BdTR10c	4766	BVZ0055	Wagga_Winter_future	Ch04	7D1	126.582	1.2	1.4	1.5	1.7	1.8	1.9	2	2.1	2.3	2.5	2.6	2.9	2.9	3.1	3.2	3.5	3.7	3.9	4.1	5.4	0.0473404	0.0797125	109.713	408.673	0	0	0	0	0	1	2	2	3	2.5	4.8	11.2	0.89	0.47	0.018	1.84	-0.00219048
27536	BdTR10c_r3_f	BdTR10c	4766	BVZ0055	Wagga_Winter_future	Ch04	13B2	126.582	1.1	1.4	1.5	1.7	1.8	1.9	1.9	2	2.3	2.6	2.6	2.7	2.9	3.1	3.2	3.5	3.7	3.9	4.1	5.4	0.0441489	0.0797125	109.713	408.673	0	0	1	1	1	1	1	2	0	2.5	4.8	12.1	0.88	0.44	0.0185	1.75	-0.00205952
27595	BdTR10c_r4_f	BdTR10c	4766	BVZ0055	Wagga_Winter_future	Ch04	16B5	126.582	1	1	1	1.1	1.2	1.3	1.5	1.7	1.9	1.9	2.1	2.3	2.6	2.7	2.9	3.1	3.1	3.5	3.8	4.9	0.0515957	0.0720447	130.948	487.771	0	0	0	0	0	0	0	0	1	2	3.9	9.2	0.89	0.48	0.0228	2.09	-0.00297619
27305	BdTR10f_r1_f	BdTR10f	4769	BVZ0055	Wagga_Winter_future	Ch04	1A3	139.981	1.1	1.4	1.5	1.7	1.7	1.8	1.9	1.9	2.2	2.3	2.4	2.6	2.9	2.9	3.1	3.3	3.6	3.9	4.1	5.2	0.0388298	0.0685304	109.039	412.072	0	0	0	0	1	1	1	2	3	2.25	4.3	9.4	0.87	0.44	0.01625	2.05	-0.00203571
27348	BdTR10f_r2_f	BdTR10f	4769	BVZ0055	Wagga_Winter_future	Ch04	3B3	126.582	1.3	1.4	1.6	1.7	1.8	1.9	2.1	2.2	2.5	2.6	2.7	2.9	3.1	3.1	3.3	3.6	3.8	4.1	4.2	5.4	0.0556738	0.070607	106.826	397.919	0	0	1	0	1	1	2	2	3	2.5	4.5	10.6	0.85	0.48	0.01475	1.45	-0.00167857
27543	BdTR10f_r3_f	BdTR10f	4769	BVZ0055	Wagga_Winter_future	Ch04	13C4	126.582	1	1	1.5	1.7	1.8	1.9	1.9	1.9	2.2	2.3	2.4	2.6	2.7	2.9	3.1	3.4	3.6	3.9	4.1	5.3	0.0505319	0.0741214	112.761	420.025	0	0	0	0	0	1	1	1	3	2.5	4.8	11.7	0.86	0.51	0.0113	1.35	-0.00358333
27590	BdTR10f_r4_f	BdTR10f	4769	BVZ0055	Wagga_Winter_future	Ch04	16A5	126.582	1.2	1.4	1.5	1.6	1.7	1.8	2	2.1	2.4	2.6	2.7	2.9	2.9	3.1	3.3	3.7	3.9	4.1	4.2	5.5	0.0526596	0.0761981	104.087	387.716	0	0	0	1	1	2	2	2	3	2.5	4.4	11.5	0.89	0.47	0.01945	1.88	-0.00203571
27365	BdTR10i_r2_f	BdTR10i	4771	BVZ0055	Wagga_Winter_future	Ch04	4B1	126.582	1.3	1.5	1.5	1.7	1.8	1.9	2	2	2.3	2.4	2.5	2.7	2.9	3.1	3.2	3.5	3.7	3.9	4.1	5.3	0.0423759	0.0741214	109.713	408.673	0	0	0	0	1	1	2	2	2	2.25	4.5	10.5	0.9	0.46	0.0192	1.79	-0.00211905
27386	BdTR10i_r1_f	BdTR10i	4771	BVZ0055	Wagga_Winter_future	Ch04	5B3	126.582	1	1.2	1.4	1.6	1.7	1.8	1.9	1.9	2.1	2.3	2.3	2.5	2.6	2.8	2.9	3.1	3.4	3.7	3.9	4.9	0.0446809	0.0629393	119.393	444.733	0	0	0	0	0	0	0	1	3	2.5	4.5	9.2	0.87	0.44	0.0211	2.14	-0.00203571
27462	BdTR10i_r3_f	BdTR10i	4771	BVZ0055	Wagga_Winter_future	Ch04	9B4	126.582	1.1	1.3	1.4	1.6	1.7	1.8	1.9	1.9	2.2	2.3	2.4	2.5	2.7	2.9	3	3.2	3.4	3.7	3.9	5.1	0.0453901	0.0741214	119.393	444.733	0	0	0	0	0	0	1	2	2	2.5	5.1	11.9	0.85	0.61	-0.0004	1.17	0.000285714
27593	BdTR10i_r4_f	BdTR10i	4771	BVZ0055	Wagga_Winter_future	Ch04	16B3	126.582	1.5	1.7	1.9	1.9	1.9	1.9	2.1	2.2	2.5	2.6	2.8	2.9	3.1	3.1	3.3	3.7	3.9	4.1	4.3	5.7	0.0367021	0.0853035	104.087	387.716	0	0	0	1	1	2	2	2	3	2.25	5.1	13.5	0.84	0.45	0.01565	1.29	-0.00177381
27336	BdTR11a_r1_f	BdTR11a	4772	BVZ0055	Wagga_Winter_future	Ch04	2C5	126.582	1	1	1.2	1.4	1.6	1.7	1.9	1.9	2.1	2.2	2.3	2.5	2.6	2.7	2.9	3.2	3.5	3.8	4.1	5.2	0.058156	0.0720447	115.982	432.026	0	0	0	0	0	0	0	0	3	2.75	5.1	11.7	0.89	0.48	0.0185	2.11	-0.00189286
27448	BdTR11a_r2_f	BdTR11a	4772	BVZ0055	Wagga_Winter_future	Ch04	8C4	126.582	1	1.2	1.2	1.4	1.6	1.7	1.7	1.8	2.1	2.2	2.3	2.5	2.5	2.7	2.9	3.1	3.3	3.7	3.9	5.2	0.047695	0.0797125	123.011	458.21	0	0	0	0	0	0	0	0	2	2.75	5.2	12.7	0.86	0.52	0.01215	1.31	-0.00135714
27538	BdTR11a_r3_f	BdTR11a	4772	BVZ0055	Wagga_Winter_future	Ch04	13B4	139.981	1	1	1	1.1	1.2	1.3	1.5	1.6	2	2.1	2.2	2.4	2.6	2.8	2.9	3.2	3.4	3.6	3.9	5.2	0.0533688	0.0832268	115.453	436.311	0	0	0	0	0	0	0	2	3	2.5	5.3	13.3	0.88	0.53	0.0159	2.13	-0.00182143
27589	BdTR11a_r4_f	BdTR11a	4772	BVZ0055	Wagga_Winter_future	Ch04	16A4	126.582	1	1	1.1	1.3	1.4	1.5	1.7	1.8	2.1	2.2	2.3	2.5	2.6	2.8	3	3.2	3.5	3.9	4.1	5.4	0.0579787	0.0797125	115.982	432.026	0	0	0	0	0	0	1	2	3	2.5	5.9	14	0.86	0.47	0.0201	2	-0.000666667
27333	BdTR11g_r1_f	BdTR11g	4775	BVZ0055	Wagga_Winter_future	Ch04	2C2	126.582	1	1	1.1	1.3	1.4	1.5	1.7	1.8	2.1	2.2	2.3	2.5	2.7	2.8	3.1	3.2	3.5	3.9	4.1	5.2	0.0579787	0.0685304	115.982	432.026	0	0	0	0	1	1	1	1	3	2.5	5.2	12	0.87	0.47	0.0143	1.68	-0.00152381
27351	BdTR11g_r2_f	BdTR11g	4775	BVZ0055	Wagga_Winter_future	Ch04	3C1	126.582	1.1	1.2	1.2	1.3	1.5	1.6	1.7	1.8	2.1	2.3	2.4	2.6	2.8	2.9	3.1	3.4	3.6	3.9	4.1	5.3	0.0492908	0.0741214	112.761	420.025	0	0	0	0	1	1	2	2	3	2.5	5.2	11.3	0.88	0.47	0.0163	1.81	-0.00133333
27500	BdTR11g_r4_f	BdTR11g	4775	BVZ0055	Wagga_Winter_future	Ch04	11B4	126.582	1	1	1.1	1.3	1.4	1.5	1.6	1.8	2.1	2.2	2.3	2.5	2.7	2.9	3.1	3.3	3.5	3.8	4.1	5.3	0.0567376	0.0776358	115.982	432.026	0	0	0	0	0	0	1	2	3	2.5	5.6	13.4	0.88	0.64	0.0148	2.87	-0.00442857
27544	BdTR11g_r3_f	BdTR11g	4775	BVZ0055	Wagga_Winter_future	Ch04	13C5	139.981	1	1	1.1	1.2	1.4	1.6	1.7	1.8	2	2.1	2.2	2.3	2.5	2.6	2.9	3.2	3.4	3.7	3.9	5.2	0.0556738	0.0797125	115.453	436.311	0	0	0	0	0	0	0	1	3	2.5	4.8	11.7	0.88	0.5	0.0141	1.73	-0.0027381
27411	BdTR12a_r1_f	BdTR12a	4776	BVZ0055	Wagga_Winter_future	Ch04	6C4	126.582	1	1	1	1	1	1.1	1.2	1.3	1.5	1.6	2.1	2.1	2.2	2.5	2.8	2.9	3.1	3.3	3.5	4.6	0.0271277	0.0685304	130.948	487.771	0	0	0	0	0	0	0	0	2	1.75	2.6	8.4	0.84	0.45	0.01495	1.24	-0.000845238
27445	BdTR12a_r2_f	BdTR12a	4776	BVZ0055	Wagga_Winter_future	Ch04	8C1	126.582	1	1	1	1	1	1.1	1.1	1.2	1.4	1.5	1.6	2.1	2.3	2.5	2.8	2.9	3	3.2	3.5	4.6	0.0202128	0.0720447	135.313	504.031	0	0	0	0	0	0	0	0	1	2	3.8	8	0.89	0.4	0.01545	2.4	-0.00302381
27528	BdTR12a_r4_f	BdTR12a	4776	BVZ0055	Wagga_Winter_future	Ch04	12D3	139.981	1	1	1	1	1	1	1	1	1.3	1.4	1.5	1.6	1.7	1.7	2.2	2.7	2.9	2.9	3.1	4.3	0.0111702	0.0741214	135.358	511.537	0	0	0	0	0	0	0	0	0	1.75	3.7	8.2	0.88	0.48	0.0171	1.81	-0.00175
27563	BdTR12a_r3_f	BdTR12a	4776	BVZ0055	Wagga_Winter_future	Ch04	14C5	155.982	1	1	1	1	1	1	1.1	1.2	1.5	2.5	1.7	2.1	2.2	2.3	2.5	2.9	2.9	3.1	3.2	4.4	0.0237589	0.070607	129.841	493.701	0	0	0	0	0	0	0	0	1	2	3.3	7.6	0.9	0.46	0.021	2.24	-0.00316667
27382	BdTR13c_r1_f	BdTR13c	4779	BVZ0055	Wagga_Winter_future	Ch04	5A4	126.582	1	1.3	1.4	1.5	1.6	1.8	1.9	1.9	2.3	2.5	2.6	2.8	2.9	3.1	3.2	3.6	3.9	4.1	4.3	4.6	0.0508865	0.0238019	104.087	387.716	0	0	0	0	0	0	0	0	1	2.25	4.2	12.5	0.89	0.43	0.01605	2.04	-0.00184524
27434	BdTR13c_r2_f	BdTR13c	4779	BVZ0055	Wagga_Winter_future	Ch04	7D4	139.981	1	1.1	1.2	1.4	1.5	1.6	1.8	1.8	2.2	2.3	2.5	2.7	2.9	3.1	3.1	3.5	3.7	3.9	4.2	5.6	0.0560284	0.0888179	106.092	400.935	0	0	0	0	0	0	0	0	1	2	4.2	12	0.87	0.47	0.01325	1.3	-0.0017619
27474	BdTR13c_r3_f	BdTR13c	4779	BVZ0055	Wagga_Winter_future	Ch04	10A2	126.582	1.2	1.2	1.4	1.6	1.6	1.8	1.9	1.9	2.3	2.6	2.6	2.8	3.1	3.1	3.3	3.7	3.9	4.1	4.3	4.7	0.0526596	0.029393	104.087	387.716	0	0	0	0	0	0	1	1	2	2.25	4.3	12.6	0.87	0.47	0.0147	1.73	-0.0020119
27594	BdTR13c_r4_f	BdTR13c	4779	BVZ0055	Wagga_Winter_future	Ch04	16B4	139.981	1.4	1.6	1.7	1.9	1.9	1.9	2.1	2.2	2.4	2.7	2.7	2.9	3.2	3.3	3.5	3.9	3.9	4.2	4.5	5.1	0.0406028	0.0440895	100.651	380.374	0	0	0	0	0	0	0	0	1	2.25	4.2	16.8	0.87	0.55	0.01015	1.35	-0.00134524
27381	BdTR13d_r1_f	BdTR13d	4780	BVZ0055	Wagga_Winter_future	Ch04	5A3	126.582	1	1.5	1.6	1.8	1.9	1.9	1.9	2.1	2.3	2.5	2.6	2.8	2.9	3.1	3.3	3.7	3.9	4.2	4.3	5.9	0.0390071	0.0929712	104.087	387.716	0	0	0	0	0	0	0	0	1	2.25	4	12.3	0.88	0.45	0.0149	1.9	-0.00128571
27442	BdTR13d_r2_f	BdTR13d	4780	BVZ0055	Wagga_Winter_future	Ch04	8B3	126.582	1.4	1.5	1.7	1.8	1.9	1.9	2.1	2.2	2.4	2.5	2.7	3.1	3.2	3.2	3.4	3.8	4.1	4.2	4.5	5.9	0.0448582	0.0888179	99.0092	368.803	0	0	0	0	0	0	0	1	3	2.25	4.6	14	0.85	0.48	0.01215	1.17	-0.00152381
27470	BdTR13d_r3_f	BdTR13d	4780	BVZ0055	Wagga_Winter_future	Ch04	9D2	126.582	1.3	1.5	1.7	1.8	1.9	1.9	2.1	2.2	2.3	2.5	2.7	2.8	2.9	3.1	3.3	3.7	3.9	4.1	4.4	4.7	0.0411348	0.0273163	104.087	387.716	0	0	0	0	0	0	0	0	2	3	5.9	14	0.86	0.45	0.0141	1.77	-0.00188095
27499	BdTR13d_r4_f	BdTR13d	4780	BVZ0055	Wagga_Winter_future	Ch04	11B3	126.582	1.3	1.4	1.5	1.7	1.8	1.9	2	2.1	2.3	2.5	2.6	2.8	3.2	3.2	3.4	3.7	3.9	4.1	4.4	4.9	0.0473404	0.0384984	104.087	387.716	0	0	0	0	0	0	1	1	2	2.25	4.5	14.8	0.86	0.48	0.01225	1.39	-0.00171429
27395	BdTR1c_r1_f	BdTR1c	4783	BVZ0055	Wagga_Winter_future	Ch04	5D2	139.981	1	1	1	1.3	1.3	1.4	1.5	1.6	2	2.1	2.1	2.3	2.5	2.6	2.8	2.9	3.1	3.4	3.6	4.7	0.0505319	0.0685304	126.626	478.535	0	0	0	0	0	0	0	0	2	2.5	4.4	8.2	0.89	0.46	0.017	1.79	-0.00229762
27428	BdTR1c_r2_f	BdTR1c	4783	BVZ0055	Wagga_Winter_future	Ch04	7C3	126.582	1.1	1.3	1.3	1.4	1.5	1.6	1.7	1.8	2.1	2.2	2.3	2.5	2.8	2.8	3.1	3.2	3.4	3.7	3.9	5.1	0.0427305	0.0741214	119.393	444.733	0	0	0	0	0	0	1	2	3	2.5	4.7	10.6	0.85	0.48	0.012	1.31	-0.00133333
27472	BdTR1c_r3_f	BdTR1c	4783	BVZ0055	Wagga_Winter_future	Ch04	9D4	126.582	1	1	1.2	1.4	1.5	1.5	1.7	1.8	2.1	2.3	2.3	2.5	2.7	2.8	2.9	3.1	3.3	3.6	3.9	5.1	0.0539007	0.0776358	123.011	458.21	0	0	0	0	0	1	2	2	3	2.5	4.5	9.9	0.85	0.47	0.01455	1.51	-0.00190476
27575	BdTR1c_r4_f	BdTR1c	4783	BVZ0055	Wagga_Winter_future	Ch04	15B4	126.582	1.1	1.2	1.3	1.4	1.6	1.7	1.8	1.9	2.2	2.2	2.3	2.6	2.6	2.9	3.1	3.2	3.5	3.8	3.9	5.1	0.052305	0.070607	115.982	432.026	0	0	0	1	1	1	2	2	3	2.5	4.9	11.5	0.85	0.63	0.01875	1.31	-0.000464286
27346	BdTR1d_r2_f	BdTR1d	4784	BVZ0055	Wagga_Winter_future	Ch04	3B1	126.582	1.3	1.4	1.5	1.6	1.7	1.8	2	2.1	2.3	2.5	2.6	2.7	2.8	3.1	3.2	3.5	3.7	4.1	4.1	5.4	0.0489362	0.0726837	109.713	408.673	0	0	1	1	1	2	2	2	3	2.5	4.2	9.7	0.87	0.45	0.01615	1.69	-0.00153571
27412	BdTR1d_r1_f	BdTR1d	4784	BVZ0055	Wagga_Winter_future	Ch04	6C5	126.582	1	1.2	1.2	1.3	1.4	1.6	1.7	1.7	2.2	2.3	2.5	2.8	2.9	2.9	3.1	3.3	3.5	3.8	4.1	5.2	0.0515957	0.0720447	115.982	432.026	0	0	0	0	1	1	2	2	3	3	4.9	10.4	0.89	0.44	0.014	2.32	-0.00160714
27565	BdTR1d_r3_f	BdTR1d	4784	BVZ0055	Wagga_Winter_future	Ch04	14D2	126.582	1	1.1	1.1	1.3	1.4	1.5	1.6	1.8	2.1	2.2	2.4	2.6	2.7	2.9	3.1	3.2	3.5	3.9	4.1	5.2	0.0537234	0.0685304	115.982	432.026	0	0	0	0	0	0	1	2	3	2.75	5	11	0.88	0.47	0.0147	1.67	-0.00258333
27582	BdTR1d_r4_f	BdTR1d	4784	BVZ0055	Wagga_Winter_future	Ch04	15D1	126.582	1.3	1.5	1.6	1.7	1.8	1.9	2	2.1	2.3	2.5	2.5	2.7	2.9	3.1	3.2	3.6	3.8	4	4.1	5.4	0.0420213	0.0761981	106.826	397.919	0	1	1	1	1	2	2	2	3	2.5	4.8	11.1	0.89	0.47	0.0199	1.94	-0.00194048
27332	BdTR1k_r1_f	BdTR1k	4788	BVZ0055	Wagga_Winter_future	Ch04	2C1	126.582	1.1	1.3	1.3	1.4	1.5	1.6	1.7	1.7	2.3	2.5	2.6	2.8	2.9	3.1	3.2	3.4	3.6	3.9	4.1	5.4	0.048227	0.0797125	112.761	420.025	0	0	0	1	1	2	2	2	3	2.75	4.2	9.1	0.87	0.44	0.01545	1.85	-0.00184524
27422	BdTR1k_r2_f	BdTR1k	4788	BVZ0055	Wagga_Winter_future	Ch04	7B2	126.582	1	1.3	1.3	1.5	1.5	1.6	1.8	1.8	2.2	2.3	2.4	2.6	2.8	2.9	3.1	3.3	3.6	3.9	4.1	5.2	0.0464539	0.0685304	112.761	420.025	0	0	0	0	0	1	2	2	3	2.75	4.8	10.9	0.89	0.46	0.01375	1.81	-0.00209524
27556	BdTR1k_r3_f	BdTR1k	4788	BVZ0055	Wagga_Winter_future	Ch04	14B3	243.683	0	0	1	1.1	1	1	1.2	1.3	1.5	1.4	1.4	2.5	2.8	2.8	2.8	3.3	3.3	4.1	4.5	4.9	0.0296562	0.0364217	87.5264	325.735	0	0	0	0	0	0	0	0	0	2.25	2.9	4.7	0.82	0.36	0.01285	1.91	-0.00363095
27603	BdTR1k_r4_f	BdTR1k	4788	BVZ0055	Wagga_Winter_future	Ch04	16D3	126.582	1.2	1.3	1.4	1.6	1.7	1.8	1.9	1.9	2.2	2.3	2.5	2.7	2.8	2.9	3.1	3.4	3.6	3.9	4.1	5.3	0.0453901	0.0741214	112.761	420.025	0	0	0	0	0	2	2	2	3	2.25	4.4	11.5	0.88	0.47	0.0153	1.59	-0.00203571
27355	BdTR2a_r2_f	BdTR2a	4789	BVZ0055	Wagga_Winter_future	Ch04	3C5	126.582	1	1.3	1.4	1.5	1.6	1.7	1.8	1.9	2.2	2.3	2.4	2.5	2.7	2.8	3.1	3.3	3.6	3.8	4.1	5.2	0.0457447	0.0720447	112.761	420.025	0	0	1	1	1	1	2	2	3	2.5	4.2	9	0.87	0.48	0.01585	1.61	-0.00179762
27397	BdTR2a_r1_f	BdTR2a	4789	BVZ0055	Wagga_Winter_future	Ch04	5D4	126.582	1	1	1.3	1.6	1.6	1.7	1.7	1.8	2.1	2.2	2.3	2.5	2.6	2.8	2.9	3.1	3.4	3.7	3.9	4.9	0.0489362	0.0629393	119.393	444.733	0	0	0	0	1	1	1	2	3	2.5	4.5	8.7	0.87	0.46	0.01505	1.75	-0.00194048
27533	BdTR2a_r3_f	BdTR2a	4789	BVZ0055	Wagga_Winter_future	Ch04	13A4	126.582	1	1	1	1	1	1	1	1	1.1	1.2	1.2	1.4	1.7	1.8	1.9	1.9	2.1	2.4	2.7	3.8	0.0037234	0.0720447	193.304	720.044	0	0	0	0	0	0	0	0	0	2	3.9	5.6	0.88	0.46	0.025	2.21	-0.00341667
27599	BdTR2a_r4_f	BdTR2a	4789	BVZ0055	Wagga_Winter_future	Ch04	16C4	139.981	1	1	1.3	1.4	1.5	1.6	1.8	1.9	2.1	2.3	2.4	2.6	2.7	2.8	3.1	3.4	3.6	3.9	4.1	5.3	0.0549645	0.0741214	109.039	412.072	0	0	0	0	0	1	2	2	3	2.25	5	12.2	0.92	0.63	0.0114	1.82	-0.000940476
27340	BdTR2j_r1_f	BdTR2j	4793	BVZ0055	Wagga_Winter_future	Ch04	2D4	139.981	1	1	1.3	1.5	1.6	1.7	1.8	1.9	2.2	2.3	2.4	2.6	2.7	2.9	3.1	3.3	3.5	3.9	4.1	5.1	0.0570922	0.0629393	112.154	423.845	0	0	0	0	1	1	2	2	3	2.75	3.9	9	0.84	0.46	0.01125	1.21	-0.0012619
27374	BdTR2j_r2_f	BdTR2j	4793	BVZ0055	Wagga_Winter_future	Ch04	4C5	126.582	1	1.2	1.4	1.6	1.9	1.9	1.9	1.9	2.1	2.2	2.3	2.5	2.6	2.9	2.9	3	3.1	3.4	3.7	4.8	0.0437943	0.0720447	130.948	487.771	0	0	0	0	0	0	0	0	2	2	3.4	7.4	0.9	0.5	0.01495	2.23	-0.0020119
27469	BdTR2j_r3_f	BdTR2j	4793	BVZ0055	Wagga_Winter_future	Ch04	9D1	126.582	1	1.2	1.3	1.4	1.5	1.6	1.7	1.8	2.1	2.3	2.4	2.6	2.7	2.9	3	3.2	3.4	3.7	3.9	5	0.0457447	0.0685304	119.393	444.733	0	0	0	0	0	1	2	2	3	2.25	4.5	10.6	0.89	0.46	0.01495	1.91	-0.00278571
27585	BdTR2j_r4_f	BdTR2j	4793	BVZ0055	Wagga_Winter_future	Ch04	15D4	139.981	1.3	1.4	1.5	1.6	1.7	1.8	2	2	2.2	2.5	2.5	2.7	2.8	2.9	3.1	3.5	3.7	3.9	4.1	5.4	0.0432624	0.0797125	106.092	400.935	0	0	0	1	1	2	2	2	3	2.5	4.3	10.8	0.87	0.47	0.01485	1.37	-0.00167857
27309	BdTR2p_r1_f	BdTR2p	4796	BVZ0055	Wagga_Winter_future	Ch04	1B2	139.981	1	1	1.2	1.3	1.5	1.6	1.7	1.8	2.1	2.1	2.2	2.3	2.6	2.7	2.8	3.1	3.2	3.5	3.8	4.9	0.0553191	0.0720447	122.668	463.581	0	0	0	0	0	0	1	2	3	2.5	4.6	8.5	0.87	0.46	0.0155	2.17	-0.00205952
27366	BdTR2p_r2_f	BdTR2p	4796	BVZ0055	Wagga_Winter_future	Ch04	4B2	126.582	1.2	1.3	1.4	1.5	1.5	1.7	1.8	1.9	2.1	2.3	2.4	2.6	2.8	2.9	3.1	3.4	3.6	3.9	4.1	5.2	0.0425532	0.0685304	112.761	420.025	0	0	0	0	1	1	2	2	3	2.5	4.4	10	0.85	0.44	0.01255	1.33	-0.0015119
27463	BdTR2p_r3_f	BdTR2p	4796	BVZ0055	Wagga_Winter_future	Ch04	9B5	126.582	1	1.3	1.3	1.4	1.6	1.7	1.8	1.9	2.1	2.3	2.4	2.6	2.7	2.9	3	3.2	3.4	3.7	3.9	5.1	0.0455674	0.0741214	119.393	444.733	0	0	0	0	1	1	2	2	3	2.5	5	11.1	0.87	0.47	0.00965	1.73	-0.00217857
27502	BdTR2p_r4_f	BdTR2p	4796	BVZ0055	Wagga_Winter_future	Ch04	11C1	139.981	1	1.2	1.2	1.3	1.5	1.5	1.6	1.7	2.1	2.2	2.3	2.5	2.6	2.7	2.9	3.1	3.3	3.5	3.8	4.3	0.045922	0.0384984	118.951	449.533	0	0	0	0	1	1	2	2	2	2.5	4.8	8	0.87	0.45	0.0129	1.56	-0.00179762
27383	BdTR3a_r1_f	BdTR3a	4797	BVZ0055	Wagga_Winter_future	Ch04	5A5	126.582	1	1.2	1.3	1.5	1.6	1.8	1.9	1.9	2.2	2.3	2.4	2.4	2.6	2.7	2.8	3.2	3.4	3.7	3.9	4.9	0.0524823	0.0629393	119.393	444.733	0	0	0	0	0	0	1	2	3	2.25	4.9	10.7	0.89	0.47	0.02085	2.88	-0.0027619
27432	BdTR3a_r2_f	BdTR3a	4797	BVZ0055	Wagga_Winter_future	Ch04	7D2	139.981	1	1.2	1.3	1.5	1.7	1.8	1.8	1.9	2.3	2.4	2.6	2.8	2.9	3.1	3.1	3.5	3.7	3.9	4.1	5.4	0.0544326	0.0797125	106.092	400.935	0	0	0	1	1	1	2	2	3	2.5	5.4	13	0.88	0.46	0.01965	2.29	-0.00166667
27471	BdTR3a_r3_f	BdTR3a	4797	BVZ0055	Wagga_Winter_future	Ch04	9D3	126.582	1	1.1	1.2	1.3	1.5	1.6	1.7	1.9	2.1	2.4	2.5	2.7	2.8	2.9	3.1	3.3	3.5	3.9	3.9	4.3	0.0542553	0.0223642	115.982	432.026	0	0	0	0	0	0	0	0	2	2.25	5.2	13.4	0.84	0.47	0.0132	1.81	-0.00219048
27498	BdTR3a_r4_f	BdTR3a	4797	BVZ0055	Wagga_Winter_future	Ch04	11B2	126.582	1	1	1.2	1.4	1.6	1.7	1.9	1.9	2.2	2.4	2.5	2.8	2.9	2.9	3.1	3.4	3.5	3.9	4.1	5.4	0.0618794	0.0797125	115.982	432.026	0	0	0	1	1	1	1	2	4	2	6.1	13.5	0.86	0.46	0.01325	1.9	-0.00190476
27311	BdTR3b_r1_f	BdTR3b	4798	BVZ0055	Wagga_Winter_future	Ch04	1B4	139.981	1	1	1.2	1.4	1.6	1.6	1.8	1.9	2.1	2.3	2.4	2.6	2.9	2.9	2.9	3.2	3.5	3.8	3.9	5.2	0.0567376	0.0761981	112.154	423.845	0	0	0	0	0	0	0	1	3	2.25	5.2	11.7	0.84	0.46	0.0188	1.95	-0.000607143
27359	BdTR3b_r2_f	BdTR3b	4798	BVZ0055	Wagga_Winter_future	Ch04	3D4	126.582	1	1.2	1.3	1.4	1.5	1.6	1.8	1.8	2.3	2.5	2.6	2.9	2.9	3.1	3.2	3.6	3.8	4.1	4.1	5.4	0.0544326	0.0726837	106.826	397.919	0	0	0	0	1	1	2	2	3	2.5	4.7	11.1	0.86	0.46	0.0214	2.24	-0.00178571
27507	BdTR3b_r4_f	BdTR3b	4798	BVZ0055	Wagga_Winter_future	Ch04	11D1	126.582	1	1	1.2	1.3	1.5	1.5	1.7	1.8	2.3	2.5	2.6	2.8	2.9	3.1	3.2	3.5	3.7	3.9	4.1	5.3	0.0625887	0.0741214	109.713	408.673	0	0	0	0	1	0	2	2	3	2.25	5.1	12.6	0.89	0.48	0.01635	2.29	-0.00208333
27567	BdTR3b_r3_f	BdTR3b	4798	BVZ0055	Wagga_Winter_future	Ch04	14D4	139.981	1	1	1.3	1.5	1.7	1.8	1.9	1.9	2.3	2.4	2.6	2.8	2.9	3.1	3.2	3.5	3.7	3.9	4.1	5.4	0.0617021	0.0797125	106.092	400.935	0	0	0	0	0	1	2	2	3	2.25	5.8	14.8	0.89	0.47	0.0219	2.34	-0.00232143
27416	BdTR3s_r1_f	BdTR3s	4802	BVZ0055	Wagga_Winter_future	Ch04	6D4	126.582	1	1.2	1.3	1.5	1.6	1.7	1.8	1.9	2.3	2.4	2.6	2.8	2.9	3.1	3.2	3.5	3.8	4.1	4.2	5.4	0.0547872	0.070607	106.826	397.919	0	0	0	0	1	1	2	2	3	2.5	5.4	12	0.86	0.46	0.0185	2.08	-0.00154762
27423	BdTR3s_r2_f	BdTR3s	4802	BVZ0055	Wagga_Winter_future	Ch04	7B3	126.582	1	1.1	1.3	1.5	1.6	1.7	1.8	1.9	2.3	2.4	2.6	2.9	2.9	3.1	3.1	3.5	3.7	3.9	4.1	5.4	0.0578014	0.0797125	109.713	408.673	0	0	0	0	1	1	1	2	3	2.5	5.6	13.5	0.87	0.48	0.01955	1.96	-0.00166667
27480	BdTR3s_r3_f	BdTR3s	4802	BVZ0055	Wagga_Winter_future	Ch04	10B3	126.582	1.1	1.2	1.3	1.4	1.5	1.6	1.8	1.9	2.1	2.3	2.4	2.6	2.8	2.9	3.1	3.2	3.4	3.6	3.9	5.2	0.0489362	0.0832268	119.393	444.733	0	0	0	0	1	1	1	1	3	2.25	5.6	12.7	0.84	0.48	0.0083	1.64	-0.00130952
27513	BdTR3s_r4_f	BdTR3s	4802	BVZ0055	Wagga_Winter_future	Ch04	12A3	126.582	1	1.3	1.4	1.6	1.7	1.8	1.9	2.1	2.3	2.5	2.6	2.9	2.9	3.1	3.3	3.6	3.8	4.1	4.2	5.6	0.0530142	0.0817891	106.826	397.919	0	0	0	0	1	2	2	2	3	2.25	5.7	14.9	0.88	0.49	0.01815	2.19	-0.00185714
27345	BdTR5m_r2_f	BdTR5m	4806	BVZ0055	Wagga_Winter_future	Ch04	3A5	126.582	1	1	1.1	1.3	1.4	1.5	1.6	1.7	2.1	2.2	2.3	2.5	2.7	2.9	2.9	3.1	3.3	3.7	3.9	4.9	0.0547872	0.0629393	123.011	458.21	0	0	0	0	0	0	0	0	2	2.25	5	9.7	0.89	0.51	0.0208	1.97	-0.000119048
27385	BdTR5m_r1_f	BdTR5m	4806	BVZ0055	Wagga_Winter_future	Ch04	5B2	139.981	1	1.1	1	1	1	1.2	1.3	1.4	1.6	1.7	1.8	2.1	2.2	2.3	2.4	2.7	2.9	3.1	3.3	4.4	0.0312057	0.0685304	135.358	511.537	0	0	0	0	0	0	0	0	1	2.25	4.9	9.3	0.88	0.44	0.02	2.03	-0.00166667
27537	BdTR5m_r3_f	BdTR5m	4806	BVZ0055	Wagga_Winter_future	Ch04	13B3	139.981	1	1	1	1.1	1.2	1.3	1.4	1.6	1.7	1.8	2.1	2.3	2.5	2.6	2.8	2.9	3.1	3.5	3.8	4.9	0.0409574	0.0720447	126.626	478.535	0	0	0	0	0	0	0	0	2	2	5.2	11.2	0.86	0.45	0.0168	1.6	-0.00161905
27586	BdTR5m_r4_f	BdTR5m	4806	BVZ0055	Wagga_Winter_future	Ch04	16A1	126.582	1	1	1.1	1.2	1.4	1.5	1.6	1.8	2.1	2.2	2.3	2.5	2.6	2.9	2.9	3.2	3.4	3.7	3.9	5.1	0.0579787	0.0741214	119.393	444.733	0	0	0	0	0	0	0	0	2	2.25	5.4	12.5	0.89	0.45	0.0184	1.94	-0.00202381
27396	BdTR9a_r1_f	BdTR9a	4808	BVZ0055	Wagga_Winter_future	Ch04	5D3	139.981	1	1.1	1.2	1.5	1.5	1.6	1.7	1.8	2.1	2.2	2.3	2.5	2.6	2.7	2.9	3.3	3.5	3.9	4	5.1	0.0498227	0.065016	112.154	423.845	0	0	0	0	0	0	1	2	3	2.25	4.5	11.8	0.88	0.45	0.01565	2.16	-0.00253571
27439	BdTR9a_r2_f	BdTR9a	4808	BVZ0055	Wagga_Winter_future	Ch04	8A5	126.582	1	1	1.4	1.6	1.8	1.9	1.9	1.9	2.2	2.4	2.5	2.8	2.9	3	3.1	3.4	3.7	3.9	4.1	5.3	0.054078	0.0741214	109.713	408.673	0	0	0	0	1	1	2	2	3	2.25	4.7	13.5	0.89	0.46	0.0159	2	-0.00197619
27455	BdTR9a_r3_f	BdTR9a	4808	BVZ0055	Wagga_Winter_future	Ch04	9A2	126.582	1	1	1.1	1.3	1.4	1.4	1.7	1.7	2.1	2.2	2.3	2.5	2.8	2.9	2.9	3.1	3.4	3.7	3.9	5.2	0.0558511	0.0797125	119.393	444.733	0	0	0	0	0	0	0	0	2	2	4.6	14.1	0.87	0.45	0.014	2.13	-0.0030119
27584	BdTR9a_r4_f	BdTR9a	4808	BVZ0055	Wagga_Winter_future	Ch04	15D3	126.582	1.3	1.4	1.6	1.8	1.9	1.9	2	2.1	2.3	2.5	2.6	2.8	2.9	3.1	3.3	3.7	3.9	4.1	4.2	5.6	0.0432624	0.0817891	104.087	387.716	0	0	0	0	2	2	2	2	3	2.25	4.8	15.3	0.85	0.46	0.0165	1.6	-0.00135714
27320	BdTR9f_r1_f	BdTR9f	4809	BVZ0055	Wagga_Winter_future	Ch04	1D3	139.981	1	1	1.4	1.6	1.6	1.8	1.9	1.9	2.1	2.3	2.3	2.5	2.7	2.8	3.1	3.4	3.6	3.9	4.1	5.2	0.0512411	0.0685304	109.039	412.072	0	0	0	0	0	0	1	1	2	2.5	4.6	12.8	0.83	0.5	0.0133	1.71	-0.00077381
27344	BdTR9f_r2_f	BdTR9f	4809	BVZ0055	Wagga_Winter_future	Ch04	3A4	126.582	1.2	1	1.4	1.6	1.7	1.8	1.9	1.9	2.2	2.3	2.4	2.6	2.7	3.1	3.2	3.5	3.7	3.9	4.1	5.3	0.0544326	0.0741214	109.713	408.673	0	0	0	0	0	1	2	2	3	2.5	4.6	12.5	0.88	0.44	0.0184	2.21	-0.00145238
27461	BdTR9f_r3_f	BdTR9f	4809	BVZ0055	Wagga_Winter_future	Ch04	9B3	126.582	1	1	1.1	1.2	1.3	1.4	1.6	1.8	2.1	2.2	2.3	2.5	2.7	2.8	2.9	3.1	3.5	3.8	3.9	5.1	0.0583333	0.070607	115.982	432.026	0	0	0	0	0	0	0	0	2	2.25	4.1	13.8	0.85	0.47	0.0131	2.03	-0.00266667
27494	BdTR9f_r4_f	BdTR9f	4809	BVZ0055	Wagga_Winter_future	Ch04	11A3	126.582	1.2	1.3	1.4	1.6	1.8	1.9	1.9	2	2.2	2.4	2.5	2.7	2.9	3	3.1	3.4	3.6	3.9	4.1	5.3	0.0469858	0.0741214	112.761	420.025	0	0	0	0	1	2	2	2	3	2.25	5	13.9	0.88	0.42	0.01415	2.05	-0.00241667
27341	Cas1_r2_f	Cas1	4190	BVZ0055	Wagga_Winter_future	Ch04	3A1	126.582	1	1.2	1.3	1.4	1.6	1.6	1.8	1.8	2.2	2.5	2.5	2.7	2.9	2.9	3.1	3.4	3.6	3.8	4.1	5.2	0.0501773	0.0720447	112.761	420.025	0	0	1	1	1	1	2	2	3	2.5	4.4	8	0.89	0.41	0.0252	2.53	-0.00222619
27399	Cas1_r1_f	Cas1	4190	BVZ0055	Wagga_Winter_future	Ch04	6A2	139.981	1	1	1.1	1.3	1.4	1.5	1.6	1.6	2.1	2.4	2.5	2.7	2.9	2.9	3.1	3.3	3.5	3.8	3.9	4.9	0.0528369	0.0594249	112.154	423.845	0	0	0	1	1	1	1	1	3	2.5	4.2	8.5	0.89	0.42	0.0209	2.36	-0.00205952
27454	Cas1_r3_f	Cas1	4190	BVZ0055	Wagga_Winter_future	Ch04	9A1	155.982	1	1	1	1.1	1.3	1.4	1.5	1.7	2.1	2.1	2.2	2.4	2.5	2.7	2.9	3.1	3.1	3.5	3.7	4.7	0.0586879	0.0629393	121.464	461.849	0	0	0	0	0	0	1	1	2	1.75	4.9	9.2	0.88	0.47	0.01895	2.2	-0.00167857
27492	Cas1_r4_f	Cas1	4190	BVZ0055	Wagga_Winter_future	Ch04	11A1	155.982	1	1	1.1	1.3	1.4	1.5	1.6	1.7	2.1	2.3	2.3	2.6	2.7	2.9	2.9	3.1	3.3	3.6	3.9	5	0.0547872	0.0720447	114.103	433.858	0	0	0	0	1	1	1	2	3	2	3.9	7.5	0.89	0.44	0.02305	2.4	-0.0022381
27430	Cas2_r2_f	Cas2	4191	BVZ0055	Wagga_Winter_future	Ch04	7C5	139.981	1	1	1	1.2	1.3	1.4	1.5	1.5	2.1	2.2	2.3	2.5	2.6	2.7	2.8	3.1	3.2	3.5	3.7	4.7	0.0535461	0.0629393	122.668	463.581	0	0	1	1	1	1	1	2	3	2.5	3.8	6.6	0.87	0.43	0.0245	2.6	-0.00213095
27458	Cas2_r3_f	Cas2	4191	BVZ0055	Wagga_Winter_future	Ch04	9A5	265.832	0	0	0	1	1	1	1	1	1.2	1.4	1.5	1.7	1.8	1.9	1.9	2.1	2.3	2.6	2.8	3.8	0.0123077	0.0629393	115.951	434.287	0	0	0	0	0	0	0	1	2	2.25	3.6	5	0.88	0.48	0.0171	2.33	-0.00192857
27597	Cas2_r4_f	Cas2	4191	BVZ0055	Wagga_Winter_future	Ch04	16C2	139.981	1	1.2	1.3	1.1	1.5	1.6	1.8	1.9	2.1	2.2	2.3	2.5	2.7	2.7	2.9	3.1	3.2	3.5	3.7	4.9	0.0526596	0.0741214	122.668	463.581	0	0	1	1	1	1	1	2	3	2	4.4	7.5	0.86	0.42	0.02035	1.74	-0.00185714
27392	Gal1_r1_f	Gal1	4210	BVZ0055	Wagga_Winter_future	Ch04	5C4	139.981	1	1	1	1.1	1.1	1.2	1.3	1.4	1.7	1.8	1.9	2.1	2.3	2.3	2.6	2.9	3.1	3.2	3.4	4.5	0.0361702	0.0685304	126.626	478.535	0	0	0	0	0	0	1	1	2	2.5	5	8	0.82	0.43	0.01495	1.32	-0.0015
27444	Gal1_r2_f	Gal1	4210	BVZ0055	Wagga_Winter_future	Ch04	8B5	155.982	1	1	1	1.1	1.2	1.3	1.3	1.4	1.7	1.7	2.1	2.3	2.6	2.7	2.9	3.1	3.1	3.4	3.6	4.7	0.0358156	0.0685304	121.464	461.849	0	0	0	0	0	1	1	1	2	2.25	4.7	8.7	0.88	0.43	0.01605	2.38	-0.0014881
27489	Gal1_r3_f	Gal1	4210	BVZ0055	Wagga_Winter_future	Ch04	10D2	139.981	1	1	1	1.1	1.1	1.3	1.3	1.4	1.6	1.7	2.1	2.2	2.5	2.6	2.8	2.9	3.1	3.3	3.5	4.5	0.0326241	0.0629393	126.626	478.535	0	0	0	0	0	1	1	1	2	2.25	4.8	8.4	0.87	0.44	0.0217	2.19	-0.00238095
27592	Gal1_r4_f	Gal1	4210	BVZ0055	Wagga_Winter_future	Ch04	16B2	155.982	1	1	1	1.1	1.1	1.2	1.4	1.5	1.9	1.9	2	2.1	2.3	2.4	2.6	2.9	3.1	3.3	3.6	4.8	0.0468085	0.0776358	121.464	461.849	0	0	0	0	0	0	1	1	3	2.25	5.3	9.6	0.87	0.45	0.0192	1.76	-0.00171429
27324	Gaz-2_r1_f	Gaz-2	4811	BVZ0055	Wagga_Winter_future	Ch04	2A3	126.582	1	1.2	1.2	1.3	1.5	1.6	1.7	1.8	2.1	2.3	2.5	2.6	2.8	2.9	3.1	3.2	3.5	3.8	4	5.2	0.0492908	0.0741214	115.982	432.026	0	0	0	0	0	1	1	2	3	2.75	4.6	10.1	0.88	0.41	0.0125	1.95	-0.00228571
27440	Gaz-2_r2_f	Gaz-2	4811	BVZ0055	Wagga_Winter_future	Ch04	8B1	126.582	1	1	1	1.2	1.3	1.4	1.5	1.7	2.1	2.2	2.3	2.6	2.6	2.9	2.9	3.1	3.4	3.8	3.9	5.1	0.0574468	0.070607	119.393	444.733	0	0	0	0	0	0	0	1	2	2.5	4.8	10.2	0.9	0.44	0.0115	1.92	-0.00209524
27466	Gaz-2_r3_f	Gaz-2	4811	BVZ0055	Wagga_Winter_future	Ch04	9C3	126.582	1	1	1.1	1.3	1.4	1.5	1.6	1.8	2.1	2.2	2.3	2.5	2.6	2.8	2.9	3.1	3.4	3.7	3.9	5.1	0.0567376	0.0741214	119.393	444.733	0	0	0	0	0	0	0	2	3	2.25	5.1	11.5	0.84	0.46	0.00985	1.16	-0.00188095
27568	Gaz-2_r4_f	Gaz-2	4811	BVZ0055	Wagga_Winter_future	Ch04	15A2	126.582	1	1.1	1.2	1.3	1.5	1.6	1.7	1.8	2.1	2.3	2.4	2.6	2.9	2.9	3.1	3.3	3.5	3.8	4.1	5.3	0.052305	0.0776358	115.982	432.026	0	0	0	0	0	0	2	2	3	2.25	4.8	11.1	0.88	0.44	0.01375	1.77	-0.00254762
27339	Gaz-3_r1_f	Gaz-3	4812	BVZ0055	Wagga_Winter_future	Ch04	2D3	126.582	1	1.2	1.2	1.4	1.5	1.6	1.7	1.8	2.2	2.4	2.5	2.7	2.9	2.9	3.1	3.4	3.6	3.9	4.1	5.3	0.051773	0.0741214	112.761	420.025	0	0	0	0	0	1	2	2	3	2.75	4.2	9.6	0.85	0.45	0.0139	1.45	-0.00128571
27420	Gaz-3_r2_f	Gaz-3	4812	BVZ0055	Wagga_Winter_future	Ch04	7A5	126.582	1	1.2	1.3	1.4	1.5	1.6	1.7	1.8	2.2	2.3	2.5	2.7	2.8	3.1	3.1	3.4	3.7	3.9	4.1	5.3	0.0494681	0.0741214	109.713	408.673	0	0	0	0	1	1	1	2	3	2.75	4.7	10.7	0.89	0.44	0.01785	1.94	-0.00180952
27476	Gaz-3_r3_f	Gaz-3	4812	BVZ0055	Wagga_Winter_future	Ch04	10A4	126.582	1	1.2	1.3	1.4	1.4	1.5	1.7	1.8	2.1	2.2	2.3	2.5	2.6	2.8	2.9	3.1	3.4	3.7	3.9	5.1	0.0460993	0.0741214	119.393	444.733	0	0	0	0	0	0	0	1	2	2.5	4.5	10.7	0.87	0.44	0.01395	1.8	-0.002
27573	Gaz-3_r4_f	Gaz-3	4812	BVZ0055	Wagga_Winter_future	Ch04	15B2	126.582	1	1.1	1.2	1.3	1.4	1.5	1.7	1.8	2.1	2.2	2.3	2.5	2.8	2.9	3.1	3.2	3.5	3.8	3.9	5.2	0.0526596	0.0761981	115.982	432.026	0	0	0	0	1	1	1	2	3	2.5	4.8	10.9	0.86	0.43	0.0158	1.54	-0.00139286
27325	Gaz6_r1_f	Gaz6	4814	BVZ0055	Wagga_Winter_future	Ch04	2A4	126.582	1	1.3	1.3	1.5	1.6	1.7	1.8	2	2.3	2.4	2.6	2.8	2.9	3.1	3.2	3.5	3.8	4.1	4.2	5.4	0.0537234	0.070607	106.826	397.919	0	0	0	1	1	2	2	2	3	2.5	4.4	9.9	0.88	0.45	0.015	1.98	-0.000845238
27373	Gaz6_r2_f	Gaz6	4814	BVZ0055	Wagga_Winter_future	Ch04	4C4	126.582	1.2	1.3	1.4	1.6	1.7	1.8	1.9	2.1	2.3	2.5	2.6	2.8	2.9	3.1	3.3	3.6	3.9	4.1	4.2	5.5	0.0530142	0.0761981	104.087	387.716	0	0	0	0	1	2	2	2	3	2.5	4.9	10.6	0.86	0.52	0.0124	1.24	-7.14286e-05
27548	Gaz6_r3_f	Gaz6	4814	BVZ0055	Wagga_Winter_future	Ch04	13D4	139.981	1	1.2	1.3	1.6	1.7	1.8	1.9	1.9	2.2	2.4	2.5	2.7	2.8	2.9	3.1	3.5	3.7	3.9	4.1	5.3	0.0507092	0.0741214	106.092	400.935	0	0	0	0	1	1	2	2	3	2.25	4.3	10.8	0.85	0.46	0.0116	1.29	-0.00108333
27587	Gaz6_r4_f	Gaz6	4814	BVZ0055	Wagga_Winter_future	Ch04	16A2	139.981	1.1	1.3	1.4	1.5	1.6	1.7	1.9	1.9	2.2	2.4	2.5	2.7	2.9	3.1	3.2	3.6	3.8	4.1	4.2	5.5	0.0469858	0.0761981	103.3	390.384	0	0	0	1	1	1	2	2	3	2.25	5	12.1	0.88	0.46	0.016	1.67	-0.00179762
27391	Kah-4_r1_f	Kah-4	4816	BVZ0055	Wagga_Winter_future	Ch04	5C3	139.981	1	1	1	1.1	1.2	1.3	1.4	1.6	2.1	2.1	2.1	2.3	2.6	2.7	2.9	3.1	3.1	3.5	3.7	4.8	0.0558511	0.0685304	126.626	478.535	0	0	0	0	0	0	0	0	2	2.5	4.8	10.2	0.85	0.46	0.0148	1.48	-0.00152381
27452	Kah-4_r2_f	Kah-4	4816	BVZ0055	Wagga_Winter_future	Ch04	8D3	126.582	1	1	1	1.1	1.2	1.4	1.5	1.6	2.1	2.3	2.5	2.8	2.9	2.9	3.1	3.3	3.5	3.8	3.9	5.3	0.0572695	0.0817891	115.982	432.026	0	0	0	0	0	0	0	0	3	2.25	4.8	11.5	0.87	0.45	0.0167	1.7	-0.00136905
27540	Kah-4_r3_f	Kah-4	4816	BVZ0055	Wagga_Winter_future	Ch04	13C1	126.582	1	1	1.2	1.4	1.5	1.7	1.7	1.8	2.2	2.4	2.5	2.7	2.8	2.9	3.1	3.3	3.5	3.9	4.1	5.2	0.0579787	0.0685304	115.982	432.026	0	0	0	0	0	1	1	1	3	2.25	5	12	0.89	0.46	0.0165	1.73	-0.0017381
27578	Kah-4_r4_f	Kah-4	4816	BVZ0055	Wagga_Winter_future	Ch04	15C2	126.582	1.1	1.2	1.3	1.5	1.6	1.8	1.9	2.1	2.3	2.4	2.6	2.9	2.9	3.1	3.2	3.6	3.8	4.1	4.1	5.4	0.0601064	0.0726837	106.826	397.919	0	0	0	0	0	0	1	2	3	2	4.7	13	0.86	0.46	0.01515	1.39	-0.00183333
27329	Kah-5_r1_f	Kah-5	4817	BVZ0055	Wagga_Winter_future	Ch04	2B3	139.981	1	1	1.2	1.3	1.5	1.6	1.7	1.8	2.1	2.3	2.3	2.5	2.7	2.8	3.1	3.2	3.5	3.9	4.1	5.2	0.0553191	0.0685304	112.154	423.845	0	0	0	0	0	0	1	1	2	2.5	5.5	13.7	0.84	0.51	0.01535	1.45	-0.00228571
27377	Kah-5_r2_f	Kah-5	4817	BVZ0055	Wagga_Winter_future	Ch04	4D3	126.582	1	1	1.3	1.5	1.7	1.8	1.9	2.1	2.3	2.5	2.7	2.9	2.9	3.1	3.2	3.6	3.9	4.1	4.2	5.5	0.0656028	0.0761981	104.087	387.716	0	0	0	0	0	0	0	0	1	2.5	4.8	14	0.86	0.42	0.0141	1.79	-0.0024881
27512	Kah-5_r4_f	Kah-5	4817	BVZ0055	Wagga_Winter_future	Ch04	12A2	126.582	1	1.2	1.3	1.5	1.6	1.7	1.8	1.9	2.2	2.4	2.5	2.8	2.9	3.1	3.1	3.5	3.7	3.9	4.1	5.5	0.0510638	0.0853035	109.713	408.673	0	0	0	0	1	1	1	2	3	2.25	5.8	15.7	0.88	0.45	0.01355	1.84	-0.00205952
27532	Kah-5_r3_f	Kah-5	4817	BVZ0055	Wagga_Winter_future	Ch04	13A3	126.582	1	1	1.2	1.3	1.5	1.5	1.7	1.8	2.2	2.5	2.6	2.7	2.9	2.9	3.1	3.4	3.6	3.9	4.1	5.3	0.0588652	0.0741214	112.761	420.025	0	0	0	0	0	1	1	2	3	2.25	5.5	14.4	0.88	0.48	0.0187	2.12	-0.00219048
27364	Kah-6_r2_f	Kah-6	4818	BVZ0055	Wagga_Winter_future	Ch04	4A5	126.582	1.2	1.4	1.5	1.6	1.7	1.9	1.9	2	2.2	2.4	2.5	2.7	2.8	3.1	3.2	3.6	3.8	4.1	4.2	5.5	0.0421986	0.0761981	106.826	397.919	0	0	0	0	0	1	2	2	3	2.5	4.9	11.5	0.9	0.49	0.0198	2.24	-0.00191667
27394	Kah-6_r1_f	Kah-6	4818	BVZ0055	Wagga_Winter_future	Ch04	5D1	126.582	1.1	1.4	1.4	1.7	1.7	1.8	1.9	1.9	2.2	2.4	2.5	2.6	2.8	2.9	3.2	3.4	3.6	3.8	4.1	5.3	0.0411348	0.0776358	112.761	420.025	0	0	0	0	0	0	1	2	3	2.5	5.1	10.7	0.89	0.41	0.0138	1.82	-0.00155952
27553	Kah-6_r3_f	Kah-6	4818	BVZ0055	Wagga_Winter_future	Ch04	14A5	126.582	1.4	1.5	1.6	1.7	1.9	1.9	2	2.1	2.3	2.5	2.6	2.8	2.9	3.2	3.3	3.6	3.9	4.2	4.3	5.7	0.0414894	0.0817891	104.087	387.716	0	0	0	0	1	2	2	2	3	2.75	5.2	12.7	0.89	0.45	0.0154	1.73	-0.00164286
27570	Kah-6_r4_f	Kah-6	4818	BVZ0055	Wagga_Winter_future	Ch04	15A4	126.582	1.4	1.5	1.7	1.8	1.9	1.9	2	2.1	2.4	2.5	2.6	2.9	2.9	3.2	3.4	3.7	3.9	4.2	4.4	5.8	0.0416667	0.0853035	104.087	387.716	0	0	0	0	1	2	2	2	3	2.5	5.3	13.8	0.88	0.4	0.0151	2.12	-0.00219048
27318	Koz-2_r1_f	Koz-2	4819	BVZ0055	Wagga_Winter_future	Ch04	1D1	126.582	1.1	1.2	1.4	1.6	1.7	1.8	1.9	1.9	2.3	2.5	2.5	2.7	2.9	3.1	3.2	3.5	3.7	3.9	4.1	5.3	0.0521277	0.0741214	109.713	408.673	0	0	0	0	1	2	2	2	3	2	4.6	11.2	0.88	0.45	0.0205	2.41	-0.0022619
27450	Koz-2_r2_f	Koz-2	4819	BVZ0055	Wagga_Winter_future	Ch04	8D1	126.582	1	1.2	1.2	1.4	1.5	1.5	1.7	1.8	2.1	2.3	2.4	2.6	2.8	2.9	3.1	3.4	3.6	3.9	4.1	5.2	0.0478723	0.0685304	112.761	420.025	0	0	0	0	1	1	1	2	3	2.5	4.8	11.1	0.89	0.47	0.01895	2.05	-0.00141667
27522	Koz-2_r4_f	Koz-2	4819	BVZ0055	Wagga_Winter_future	Ch04	12C2	139.981	1	1	1.1	1.3	1.4	1.5	1.7	1.8	2.1	2.2	2.3	2.5	2.7	2.8	2.9	3.1	3.5	3.7	3.9	5.2	0.0579787	0.0797125	112.154	423.845	0	0	0	0	0	0	1	1	2	2.25	3.9	13.7	0.85	0.47	0.01235	1.46	-0.0015
27561	Koz-2_r3_f	Koz-2	4819	BVZ0055	Wagga_Winter_future	Ch04	14C3	126.582	1	1.2	1.3	1.4	1.6	1.7	1.8	1.9	2.1	2.3	2.3	2.6	2.8	2.9	3.1	3.3	3.5	3.9	4	5.3	0.0485816	0.0761981	115.982	432.026	0	0	0	0	0	0	1	1	2	2.25	5.4	14.5	0.87	0.48	0.0165	1.62	-0.00172619
27335	Koz-3_r1_f	Koz-3	4820	BVZ0055	Wagga_Winter_future	Ch04	2C4	139.981	1	1.2	1.2	1.4	1.5	1.5	1.7	1.8	2.1	2.3	2.3	2.6	2.7	2.9	3.1	3.3	3.5	3.9	4.1	5.3	0.0478723	0.0741214	112.154	423.845	0	0	0	0	1	1	2	2	3	2.5	4.7	9.7	0.83	0.5	0.01235	0.99	5.95238e-05
27362	Koz-3_r2_f	Koz-3	4820	BVZ0055	Wagga_Winter_future	Ch04	4A3	126.582	1.2	1.3	1.4	1.5	1.6	1.8	1.9	1.9	2.2	2.3	2.4	2.6	2.8	3.1	3.1	3.5	3.7	3.9	4.1	5.4	0.0471631	0.0797125	109.713	408.673	0	0	0	1	1	1	2	2	3	2.75	4.9	10.5	0.87	0.44	0.01735	1.64	-0.00189286
27506	Koz-3_r4_f	Koz-3	4820	BVZ0055	Wagga_Winter_future	Ch04	11C5	126.582	1	1.2	1.3	1.4	1.4	1.5	1.7	1.8	2.2	2.3	2.4	2.6	2.7	2.9	3.1	3.4	3.6	3.9	4.1	5.4	0.0498227	0.0797125	112.761	420.025	0	0	0	1	1	1	2	2	3	2.5	4.9	11.1	0.87	0.44	0.01565	1.64	-0.00147619
27534	Koz-3_r3_f	Koz-3	4820	BVZ0055	Wagga_Winter_future	Ch04	13A5	126.582	1.1	1.2	1.4	1.5	1.6	1.7	1.9	1.9	2.3	2.5	2.6	2.8	2.9	3.2	3.3	3.7	3.9	4.1	4.3	5.7	0.0537234	0.0853035	104.087	387.716	0	0	0	1	1	2	2	2	3	2.25	4.7	11	0.88	0.46	0.01805	1.8	-0.00186905
27379	Mig3_r1_f	Mig3	4239	BVZ0055	Wagga_Winter_future	Ch04	5A1	139.981	1	1	1.1	1.2	1.2	1.3	1.4	1.6	2.1	2.3	2.3	2.5	2.6	2.7	2.7	3.1	3.3	3.5	3.7	4.8	0.052305	0.0685304	118.951	449.533	0	0	0	1	1	1	1	2	3	2.25	4	5.3	0.89	0.46	0.02285	2.82	-0.00286905
27451	Mig3_r2_f	Mig3	4239	BVZ0055	Wagga_Winter_future	Ch04	8D2	139.981	1	1	1	1.1	1.2	1.3	1.5	1.7	2.1	2.2	2.3	2.5	2.6	2.8	2.9	3.2	3.5	3.7	4	4.9	0.0590426	0.0608626	112.154	423.845	0	0	1	1	1	1	2	2	3	2.25	4	7	0.87	0.44	0.01765	1.96	-0.00194048
27521	Mig3_r4_f	Mig3	4239	BVZ0055	Wagga_Winter_future	Ch04	12C1	126.582	1	1.1	1.1	1.3	1.3	1.5	1.7	1.7	2.2	2.5	2.6	2.7	2.9	2.9	3.1	3.4	3.6	3.9	4.1	5.3	0.0572695	0.0741214	112.761	420.025	0	0	1	1	1	1	2	2	3	2.25	5.7	7.9	0.87	0.44	0.0188	1.89	-0.00235714
27535	Mig3_r3_f	Mig3	4239	BVZ0055	Wagga_Winter_future	Ch04	13B1	126.582	1	1	1.1	1.2	1.3	1.4	1.6	1.6	2.2	2.4	2.4	2.6	2.8	2.9	3.1	3.3	3.6	3.9	4.1	5.1	0.058156	0.0629393	112.761	420.025	0	1	1	1	1	1	2	2	3	2.25	3.7	8.1	0.88	0.45	0.02245	2.19	-0.00247619
27306	Mur3_r1_f	Mur3	4248	BVZ0055	Wagga_Winter_future	Ch04	1A4	171.71	1	1	1	1	1.1	1.2	1.2	1.3	1.5	1.6	1.7	2.1	2.2	2.2	2.3	2.6	2.7	3.1	3.2	4.4	0.026773	0.070607	133.633	511.119	0	0	0	0	0	1	1	1	2	2.5	3.7	5.5	0.87	0.41	0.01725	2.72	-0.00190476
27418	Mur3_r2_f	Mur3	4248	BVZ0055	Wagga_Winter_future	Ch04	7A3	155.982	1	1	1	1	1.1	1.2	1.2	1.3	1.5	1.6	1.7	2.1	2.3	2.3	2.5	2.8	3.1	3.1	3.3	4.6	0.026773	0.0797125	121.464	461.849	0	0	0	0	1	0	0	0	2	2.5	4.2	6.4	0.88	0.39	0.02105	2.74	-0.00195238
27473	Mur3_r3_f	Mur3	4248	BVZ0055	Wagga_Winter_future	Ch04	10A1	139.981	1	1	1	1.1	1.2	1.3	1.3	1.4	1.6	1.6	2.1	2.2	2.3	2.5	2.6	2.7	3.1	3.3	3.5	4.5	0.0320922	0.0629393	126.626	478.535	0	0	0	0	1	1	1	1	2	2	3.8	5.9	0.88	0.43	0.0208	2.26	-0.00252381
27588	Mur3_r4_f	Mur3	4248	BVZ0055	Wagga_Winter_future	Ch04	16A3	126.582	1	1	1	1.1	1.2	1.3	1.4	1.5	1.7	2.1	2.1	2.2	2.5	2.6	2.8	3.1	3.2	3.4	3.6	4.7	0.0390071	0.0685304	126.856	472.529	0	0	0	0	1	1	1	1	2	2.5	4.9	8	0.88	0.44	0.0296	2.41	-0.00214286
27319	Pal1_r1_f	Pal1	4250	BVZ0055	Wagga_Winter_future	Ch04	1D2	155.982	1	1	1	1	1	1.1	1.2	1.4	1.6	1.8	1.8	2.1	2.3	2.3	2.5	2.7	3.1	3.3	3.5	4.5	0.0328014	0.0629393	121.464	461.849	0	0	0	0	0	1	1	1	2	2.25	3.5	5.5	0.87	0.45	0.01745	2.35	-0.0019881
27435	Pal1_r2_f	Pal1	4250	BVZ0055	Wagga_Winter_future	Ch04	8A1	126.582	1	1	1	1.2	1.3	1.4	1.5	1.6	2.1	2.2	2.3	2.4	2.5	2.7	3.1	3.3	3.5	3.8	4.1	5.2	0.0554965	0.0720447	115.982	432.026	0	0	1	1	1	1	2	2	3	2.5	3.3	5.1	0.89	0.42	0.0173	2.35	-0.00220238
27557	Pal1_r3_f	Pal1	4250	BVZ0055	Wagga_Winter_future	Ch04	14B4	139.981	1	1	1.1	1.1	1.2	1.3	1.4	1.5	1.7	2.1	2.2	2.4	2.6	2.7	2.9	3.1	3.3	3.5	3.8	5	0.0367021	0.0776358	118.951	449.533	0	0	0	0	0	1	1	1	3	1.75	4.1	6.9	0.88	0.44	0.0226	2.52	-0.00265476
27580	Pal1_r4_f	Pal1	4250	BVZ0055	Wagga_Winter_future	Ch04	15C4	139.981	1	1	1	1.2	1.3	1.4	1.5	1.7	2.1	2.2	2.3	2.5	2.6	2.8	3.1	3.3	3.5	3.8	4.1	5.1	0.0574468	0.0664537	112.154	423.845	0	0	0	1	1	1	1	2	2	2	3.9	7.5	0.84	0.44	0.0161	1.4	-0.00183333
27414	Pal2032_r1_f	Pal2032	4822	BVZ0055	Wagga_Winter_future	Ch04	6D2	139.981	1	1	1	1.1	1.2	1.3	1.4	1.5	2.1	2.2	2.3	2.5	2.7	2.8	2.9	3.1	3.4	3.7	3.9	4.9	0.0539007	0.0629393	115.453	436.311	0	0	1	1	1	1	1	2	3	2.5	4.4	8.8	0.88	0.43	0.015	3.73	-0.00333333
27433	Pal2032_r2_f	Pal2032	4822	BVZ0055	Wagga_Winter_future	Ch04	7D3	126.582	1	1	1	1.1	1.2	1.2	1.3	1.4	1.7	2.1	2.2	2.3	2.5	2.7	2.8	3.1	3.1	3.4	3.6	4.7	0.0356383	0.0685304	130.948	487.771	0	0	0	1	1	1	1	1	4	2.5	4.6	7.9	0.87	0.43	0.01905	1.81	-0.00240476
27542	Pal2032_r3_f	Pal2032	4822	BVZ0055	Wagga_Winter_future	Ch04	13C3	155.982	1	1	1	1.1	1.2	1.3	1.4	1.5	1.7	1.8	2.2	2.3	2.6	2.7	2.9	3	3.1	3.4	3.7	4.7	0.0390071	0.0664537	121.464	461.849	0	0	0	0	0	1	1	1	3	2.25	4.7	8.9	0.88	0.43	0.0242	2.66	-0.00341667
27579	Pal2032_r4_f	Pal2032	4822	BVZ0055	Wagga_Winter_future	Ch04	15C3	155.982	1	1	1	1	1	1.1	1.2	1.3	1.6	1.8	2.1	2.1	2.3	2.4	2.6	2.9	3.1	3.2	3.5	4.7	0.0308511	0.0776358	121.464	461.849	0	0	0	0	1	1	1	1	2	2.25	4.5	8.6	0.82	0.44	0.01285	1.16	-0.00153571
27331	Rei7_r1_f	Rei7	4264	BVZ0055	Wagga_Winter_future	Ch04	2B5	126.582	1	1	1.1	1.1	1.2	1.3	1.4	1.5	2.1	2.1	2.2	2.4	2.6	2.7	2.8	3.1	3.2	3.5	3.6	4.7	0.0515957	0.065016	126.856	472.529	0	0	0	0	1	1	1	1	2	2.25	4.2	6.9	0.89	0.44	0.02255	3.03	-0.00395238
27438	Rei7_r2_f	Rei7	4264	BVZ0055	Wagga_Winter_future	Ch04	8A4	139.981	1	1	1.1	1.2	1.3	1.4	1.5	1.6	2.1	2.2	2.3	2.5	2.6	2.8	2.9	3.1	3.3	3.6	3.8	4.8	0.0531915	0.0629393	118.951	449.533	0	0	0	0	1	1	1	1	3	2.5	4.6	7.9	0.88	0.44	0.01775	2.14	-0.00265476
27484	Rei7_r3_f	Rei7	4264	BVZ0055	Wagga_Winter_future	Ch04	10C2	139.981	1	1	1	1.1	1.1	1.2	1.3	1.4	1.6	1.7	2.1	2.1	2.3	2.4	2.6	2.9	3.1	3.3	3.5	4.5	0.0324468	0.0629393	126.626	478.535	0	0	0	0	0	1	1	1	2	2.75	4.5	8.2	0.86	0.42	0.01785	1.76	-0.00213095
27601	Rei7_r4_f	Rei7	4264	BVZ0055	Wagga_Winter_future	Ch04	16D1	126.582	1	1.1	1.1	1.3	1.5	1.5	1.6	1.8	2.2	2.3	2.5	2.6	2.8	2.9	3.1	3.3	3.5	3.9	3.9	5.1	0.0569149	0.0670927	115.982	432.026	0	0	0	1	1	1	2	2	3	2.5	5.5	10.5	0.89	0.44	0.01675	1.96	-0.00209524
27337	Sar2_r1_f	Sar2	4267	BVZ0055	Wagga_Winter_future	Ch04	2D1	139.981	1	1	1	1.1	1.2	1.3	1.4	1.5	1.7	2.1	2.2	2.3	2.5	2.6	2.7	3.1	3.2	3.4	3.7	4.9	0.0390071	0.0776358	122.668	463.581	0	0	0	0	1	1	1	1	2	2.75	3.8	6.5	0.88	0.4	0.0254	2.76	-0.00290476
27343	Sar2_r2_f	Sar2	4267	BVZ0055	Wagga_Winter_future	Ch04	3A3	139.981	1	1	1	1	1.1	1.2	1.3	1.4	1.6	1.7	2.1	2.2	2.4	2.5	2.7	2.9	3.1	3.4	3.6	4.8	0.0336879	0.0741214	126.626	478.535	0	0	0	0	0	1	1	1	2	2.5	4	6.5	0.88	0.43	0.02315	2.42	-0.00215476
27456	Sar2_r3_f	Sar2	4267	BVZ0055	Wagga_Winter_future	Ch04	9A3	155.982	1	1	1	1.1	1.2	1.3	1.4	1.5	1.8	1.9	2.1	2.2	2.5	2.5	2.7	2.9	3.1	3.3	3.5	4.6	0.0427305	0.0685304	121.464	461.849	0	0	0	0	0	1	1	1	2	2.25	4.5	8.5	0.88	0.44	0.0193	2.18	-0.00229762
27591	Sar2_r4_f	Sar2	4267	BVZ0055	Wagga_Winter_future	Ch04	16B1	155.982	1	1	1	1.1	1.2	1.3	1.4	1.5	1.8	1.9	2.1	2.2	2.4	2.5	2.7	2.9	3.1	3.3	3.6	4.7	0.0427305	0.0720447	121.464	461.849	0	0	0	0	0	1	1	1	2	2.25	4.6	8.2	0.88	0.43	0.02265	1.87	-0.00253571
27367	Sig2_r2_f	Sig2	4272	BVZ0055	Wagga_Winter_future	Ch04	4B3	126.582	1	1	1	1	1	1.1	1.3	1.4	1.6	1.7	1.8	2.1	2.3	2.4	2.6	2.9	3.1	3.2	3.5	4.6	0.0340426	0.0720447	130.948	487.771	0	0	0	0	0	1	1	1	2	2.25	4.5	6.6	0.88	0.42	0.0236	2.47	-0.00289286
27401	Sig2_r1_f	Sig2	4272	BVZ0055	Wagga_Winter_future	Ch04	6A4	139.981	1	1	1.1	1.2	1.3	1.5	1.6	1.7	2.1	2.2	2.3	2.5	2.6	2.8	2.9	3.2	3.3	3.6	3.8	5.1	0.0565603	0.0797125	118.951	449.533	0	0	1	1	1	1	1	2	3	2.5	4.9	9.5	0.89	0.42	0.02215	2.13	-0.00145238
27504	Sig2_r4_f	Sig2	4272	BVZ0055	Wagga_Winter_future	Ch04	11C3	126.582	1	1	1.1	1.2	1.3	1.3	1.5	1.6	2.1	2.1	2.2	2.3	2.5	2.6	2.8	3.1	3.2	3.5	3.8	4.9	0.0530142	0.0720447	126.856	472.529	0	0	0	1	1	1	1	2	3	2	4.4	7.8	0.83	0.42	0.015	1.43	-0.00175
27551	Sig2_r3_f	Sig2	4272	BVZ0055	Wagga_Winter_future	Ch04	14A3	126.582	1	1	1.1	1.2	1.3	1.3	1.5	1.5	2.1	2.2	2.3	2.5	2.7	2.8	2.9	3.2	3.4	3.6	3.8	5.1	0.0510638	0.0797125	119.393	444.733	0	0	0	1	1	1	2	2	3	2.25	4.3	6.6	0.88	0.45	0.02745	2.3	-0.0019881
27357	USDA4006_r2_f	USDA4006	4146	BVZ0055	Wagga_Winter_future	Ch04	3D2	139.981	1	1	1	1.1	1.1	1.2	1.3	1.4	1.7	1.7	2.1	2.3	2.4	2.5	2.7	3.1	3.2	3.5	3.6	4.8	0.0361702	0.070607	122.668	463.581	0	0	0	0	0	0	1	1	2	1.5	3.3	4.8	0.87	0.42	0.01885	2.18	-0.00285714
27384	USDA4006_r1_f	USDA4006	4146	BVZ0055	Wagga_Winter_future	Ch04	5B1	126.582	1	1	1	1	1	1.2	1.2	1.3	1.5	1.6	2.1	2.2	2.4	2.5	2.8	3.1	3.2	3.5	3.7	4.9	0.027305	0.0741214	126.856	472.529	0	0	0	0	0	1	1	1	2	1.5	3.2	5.2	0.89	0.46	0.01405	2.65	-0.00308333
27490	USDA4006_r3_f	USDA4006	4146	BVZ0055	Wagga_Winter_future	Ch04	10D3	139.981	1	1	1	1	1.1	1.2	1.3	1.4	1.6	1.6	2.2	2.4	2.6	2.7	2.9	3.2	3.4	3.6	3.9	5.1	0.0336879	0.0776358	115.453	436.311	0	0	0	0	1	1	1	2	3	1.5	3	5.6	0.86	0.42	0.0236	2.5	-0.0027381
27572	USDA4006_r4_f	USDA4006	4146	BVZ0055	Wagga_Winter_future	Ch04	15B1	139.981	1	1	1	1.1	1.2	1.3	1.4	1.5	2.1	2.2	2.2	2.5	2.6	2.8	3.1	3.3	3.5	3.9	4.1	5.3	0.0539007	0.0741214	112.154	423.845	0	0	0	0	1	1	1	2	3	1.5	3.3	6.5	0.89	0.44	0.02205	2.24	-0.00258333
27310	WLE2-2_r1_f	WLE2-2	4825	BVZ0055	Wagga_Winter_future	Ch04	1B3	139.981	1	1	1	1	1.4	1.5	1.6	1.8	1.9	1.9	2.1	2.3	2.4	2.5	2.8	2.9	3.1	3.4	3.7	5.1	0.0553191	0.0888179	126.626	478.535	0	0	0	0	0	0	0	1	2	2.5	5.5	12	0.84	0.46	0.01825	2.24	-0.00227381
27370	WLE2-2_r2_f	WLE2-2	4825	BVZ0055	Wagga_Winter_future	Ch04	4C1	126.582	1	1	1.2	1.3	1.4	1.6	1.8	1.9	2.1	2.2	2.2	2.4	2.5	2.8	2.9	3.1	3.3	3.5	3.9	5.1	0.0590426	0.0811502	123.011	458.21	0	0	0	0	0	0	0	1	2	2.5	5.4	12.3	0.89	0.42	0.01935	2.56	-0.00322619
27483	WLE2-2_r3_f	WLE2-2	4825	BVZ0055	Wagga_Winter_future	Ch04	10C1	139.981	1	1	1.1	1.3	1.4	1.6	1.7	1.8	1.9	2.1	2.2	2.3	2.5	2.6	2.9	3.1	3.1	3.5	3.7	5.1	0.0507092	0.0853035	126.626	478.535	0	0	0	0	0	1	1	1	2	2.25	4.8	10.5	0.88	0.47	0.0284	2.73	-0.00230952
27574	WLE2-2_r4_f	WLE2-2	4825	BVZ0055	Wagga_Winter_future	Ch04	15B3	155.982	1	1	1	1.2	1.3	1.5	1.6	1.7	2.1	2.1	2.2	2.4	2.6	2.9	2.9	3.1	3.4	3.7	3.9	5.3	0.0588652	0.0853035	110.747	421.098	0	0	0	0	0	1	1	1	2	2.5	5.1	12.6	0.85	0.46	0.0209	1.84	-0.0017619
27406	Yas3_r1_f	Yas3	4277	BVZ0055	Wagga_Winter_future	Ch04	6B4	139.981	1	1	1.1	1.2	1.3	1.4	1.4	1.5	2.1	2.3	2.4	2.7	2.8	2.9	3.2	3.4	3.7	3.9	4.1	5.2	0.05	0.0685304	106.092	400.935	0	0	1	1	1	1	2	2	3	2.25	3.7	6.9	0.83	0.42	0.0183	1.58	-0.00133333
27443	Yas3_r2_f	Yas3	4277	BVZ0055	Wagga_Winter_future	Ch04	8B4	139.981	1	1	1.2	1.3	1.4	1.5	1.6	1.7	2.2	2.3	2.4	2.6	2.7	2.8	3.1	3.3	3.5	3.8	3.9	4.9	0.0562057	0.0594249	112.154	423.845	0	0	0	1	1	1	1	2	3	2.25	4	7	0.87	0.42	0.0233	2.19	-3.57143e-05
27552	Yas3_r3_f	Yas3	4277	BVZ0055	Wagga_Winter_future	Ch04	14A4	139.981	1	1.1	1.2	1.3	1.4	1.5	1.6	1.8	2.2	2.3	2.4	2.6	2.7	2.9	3.1	3.4	3.6	3.9	4.1	5.2	0.0551418	0.0685304	109.039	412.072	0	0	1	1	1	1	2	2	3	2	3.9	7.6	0.88	0.43	0.0249	2.4	-0.00247619
27569	Yas3_r4_f	Yas3	4277	BVZ0055	Wagga_Winter_future	Ch04	15A3	139.981	1	1	1.2	1.3	1.5	1.6	1.6	1.8	2.3	2.4	2.6	2.8	2.8	3.1	3.3	3.6	3.8	4.1	4.2	5.4	0.0615248	0.070607	103.3	390.384	0	1	1	1	1	1	2	2	3	2	3.8	7.2	0.86	0.41	0.0262	2.48	-0.00238095
[truncated: 25 more columns]
