# Supplementary material
Source: publisher figshare collection journal article supplement (https://gsajournals.figshare.com/articles/dataset/_/7345160)
Supplement: Supplementary file 1 [file 1]

S01. Coverage of *B. stacei* and *B. distachyon* Genomes for Species ID

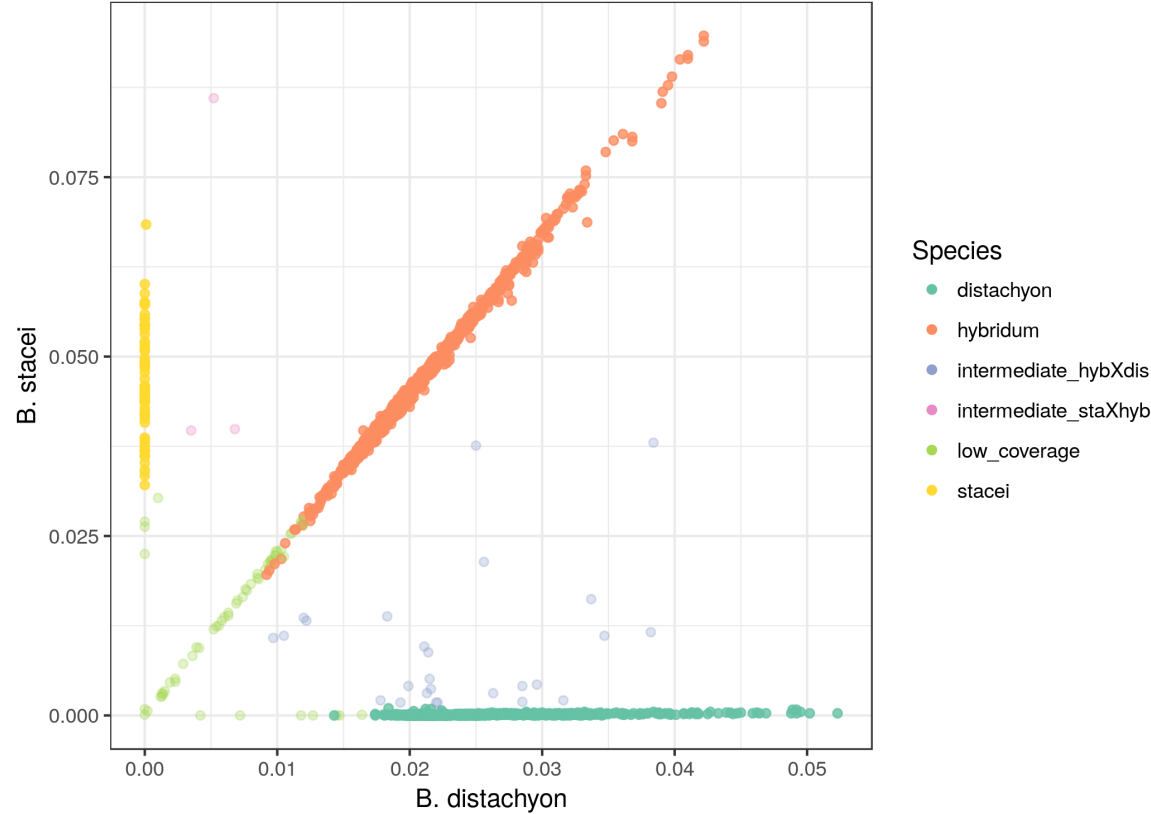

S02. Structure of *B. distachyon* collection as sequenced by GBS

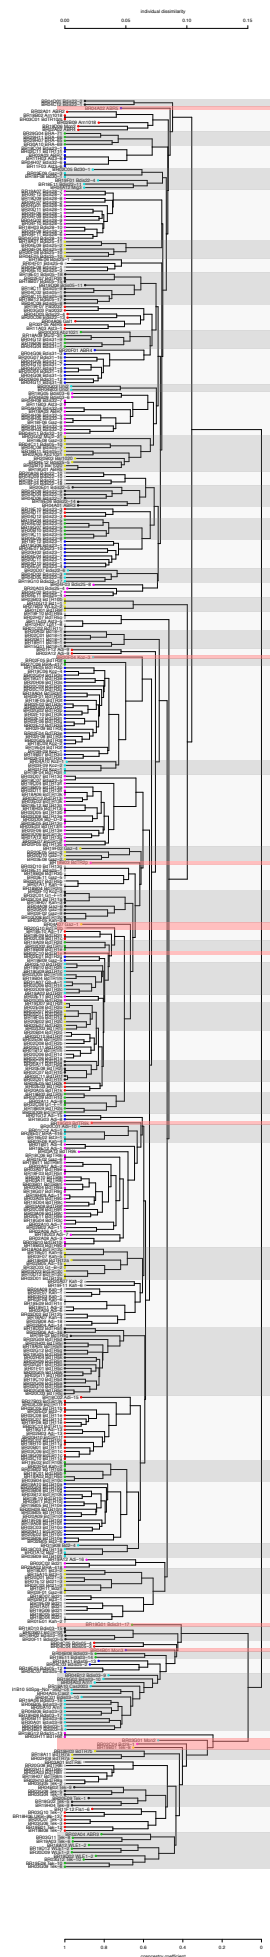

S03. *B. distachyon* reduced set STRUCTURE plots for k=2

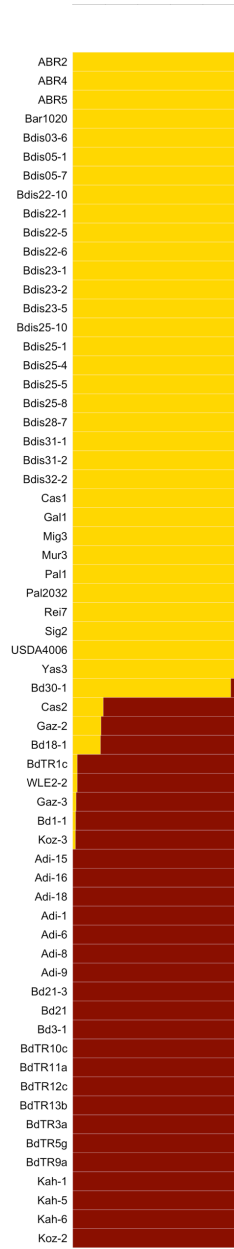

**S04. Dendrograms of genomic distance of *B. distachyon* collection at ~2M SNPs.** Left - Accessions within a genotype showed very little divergence relative to variation between. Right - A single accession for each genotype was selected and three outlier accessions belonging to subgroup B were removed for linkage disequilibrium and association analysis.

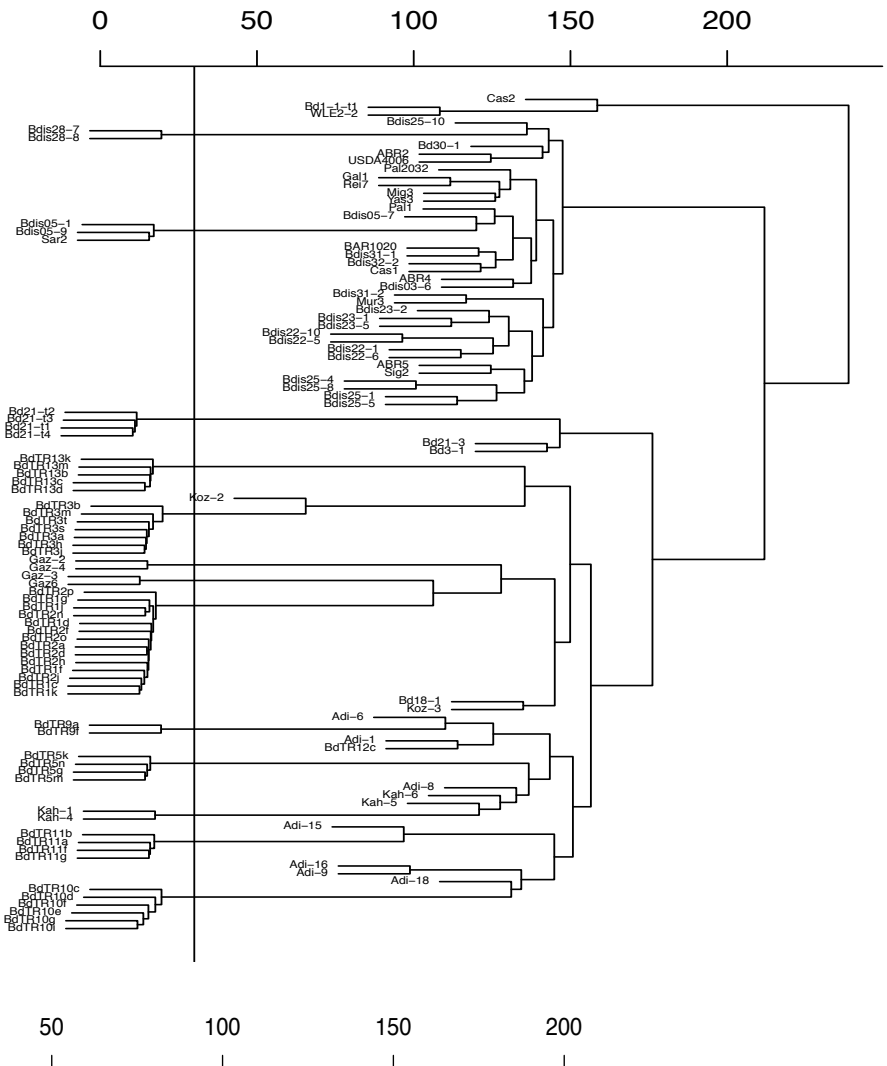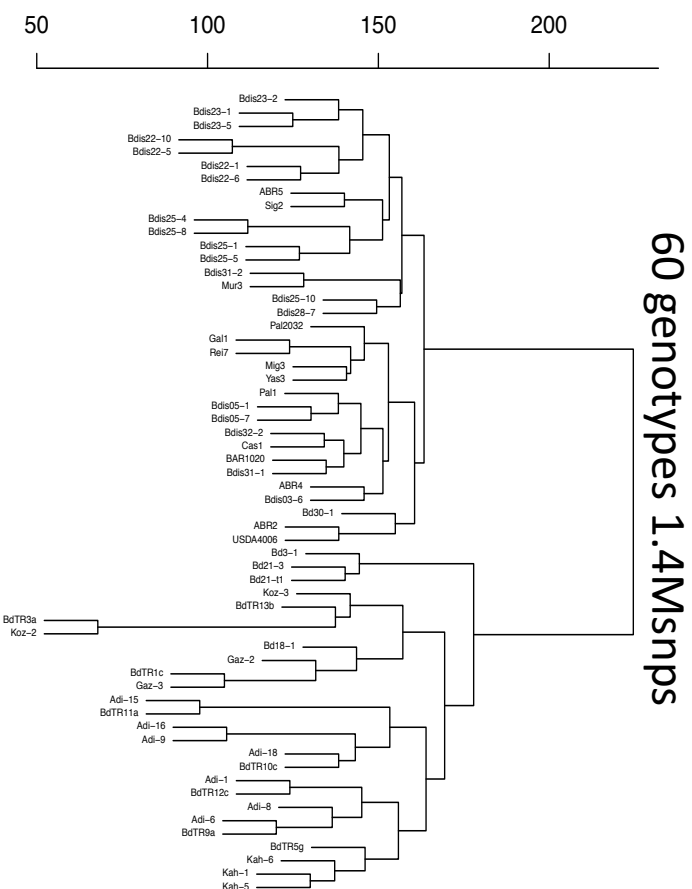

60 genotypes 1.4Msnps

S05. Linkage disequilibrium (LD) across the *B. distachyon* genome  
Top – LD as calculated across the five chromosomes (Ch); Bottom – LD at representative section of the genome.

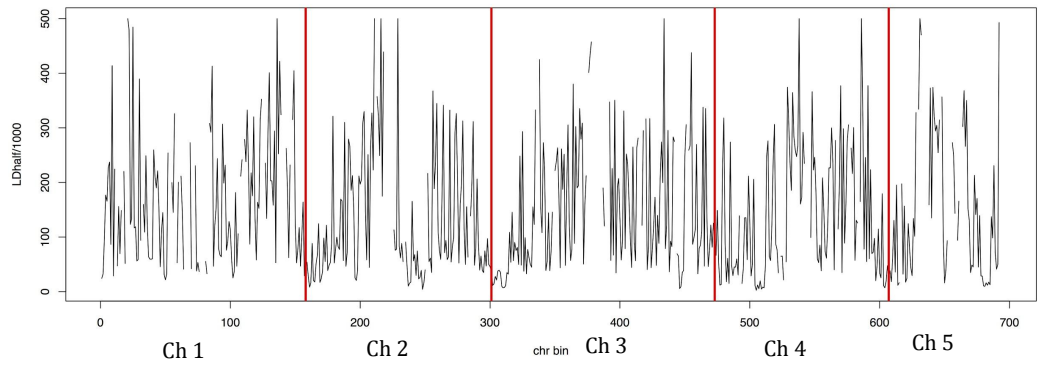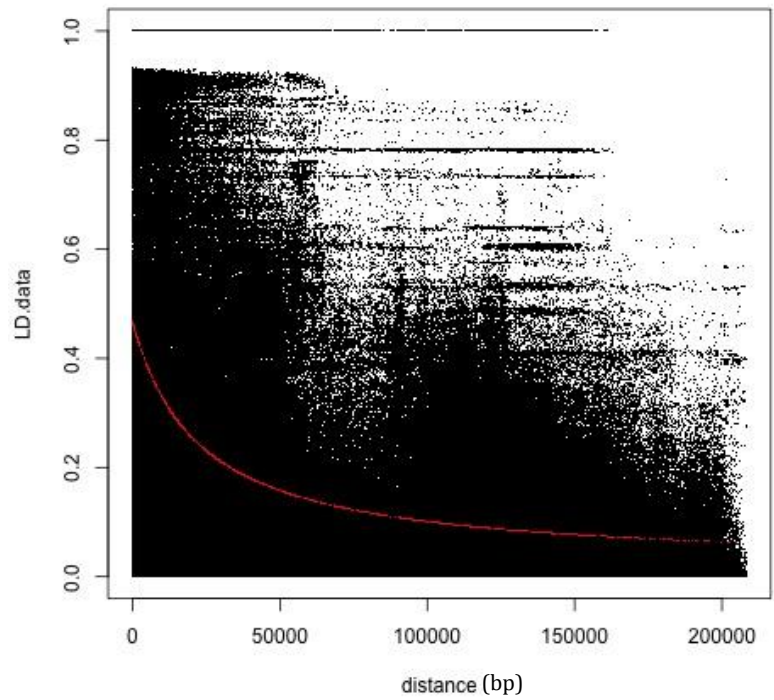

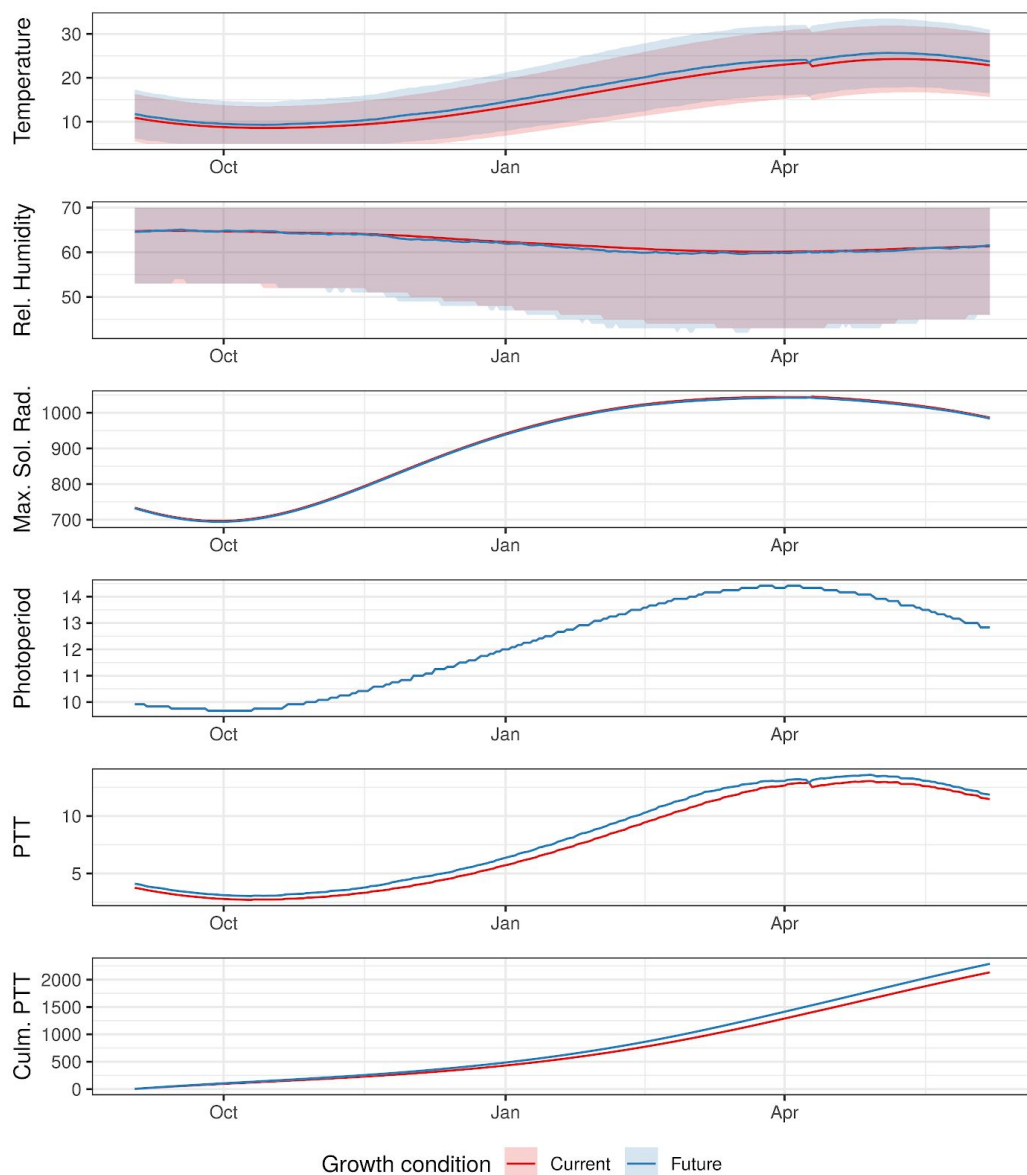

**Figure S6:** Dynamic growth conditions mimicking current and future climates. From top to bottom, for each simulated climate: mean daily temperature (°C), and diurnal temperature range; mean daily relative humidity (%) and diurnal range; daily maximum solar radiation (Watt/m<sup>2</sup>); photoperiod (hours daylight); photo-thermal time (degree-days above 2°C with non-zero solar radiation); cumulative photo-thermal time over the growth season. An exploration of relevant climate change models is included as Table S11. Full SolarCalc output files are available at <https://doi.org/10.6084/m9.figshare.7028039.v1>

S08. Flowering time experiment across 266 *B. distachyon* accessions (BVZ0032)

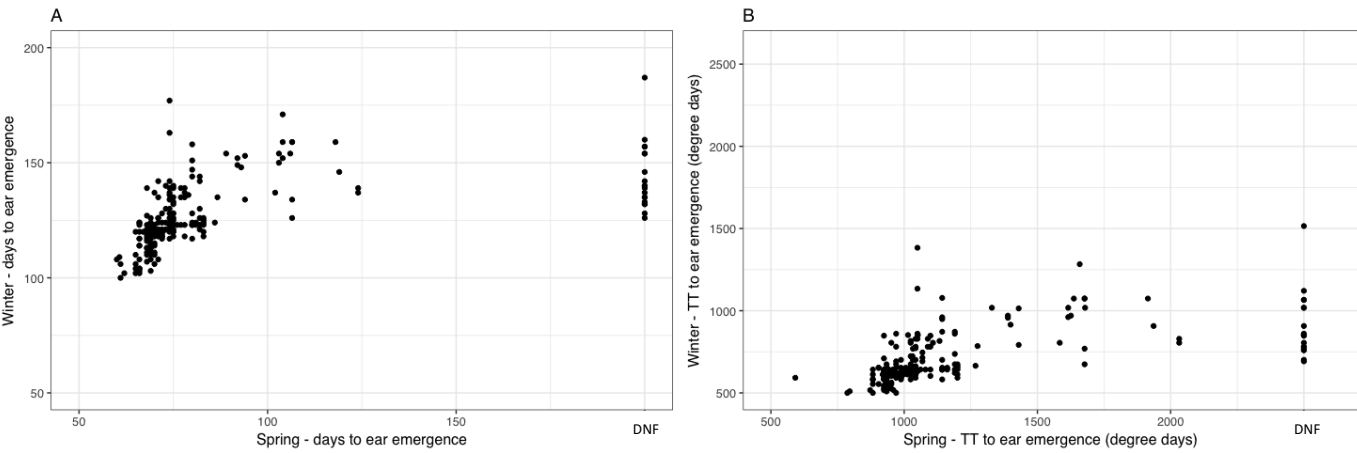

## S09 - Phenotypic correlation of traits from the early vigour validation experiment

### A. Experimental design

10 replicates of 10 lines:

- Bd21
- Bd21-3
- ABR5
- ABR2
- Bd30-1
- Bdis23-05
- BdTR11a
- BdTR2n

|                     | No. Leaves | No. Tillers | Leaf #3 Width | Leaf #3 Length | Total Leaf Area | Seedling Height | AGBM    |
|---------------------|------------|-------------|---------------|----------------|-----------------|-----------------|---------|
| Days to Germination | -0.12**    | -0.00       | -0.07*        | -0.09*         | -0.14**         | -0.07*          | -0.12** |
| No. Leaves          |            | 0.05        | 0.16**        | 0.06*          | 0.41**          | 0.21**          | 0.42**  |
| No. Tillers         |            |             | -0.08*        | -0.07*         | 0.13**          | -0.04           | 0.02    |
| Leaf #3 Width       |            |             |               | 0.53**         | 0.29**          | 0.50**          | 0.46**  |
| Leaf #3 Length      |            |             |               |                | 0.35**          | 0.66**          | 0.48**  |
| Total Leaf Area     |            |             |               |                |                 | 0.56**          | 0.88**  |
| Seedling Height     |            |             |               |                |                 |                 | 0.74**  |

**Table B. Phenotypic correlations ( $r^2$ ) between surrogate early vigour measurements and destructive harvest.** AGBM – above ground biomass dry mass; \*\*  $p < 0.01$ , \*  $p < 0.05$

|                          | Leaf No | Tiller No | Leaf #3 Width | Leaf #3 Length | Total Leaf Area | Height | Biomass |
|--------------------------|---------|-----------|---------------|----------------|-----------------|--------|---------|
| $h^2_{\text{accession}}$ | 0.43    | 0.45      | 0.60          | 0.64           | 0.33            | 0.74   | 0.51    |

**Table C. Heritability of early vigour traits from trait validation study.** All results highly significant  $p < 0.001$



S13. Heritability of traits of interest from 2015 temperature and 2050 temperature climate experiment (BVZ0055)

| <b>Trait Group</b>     | <b>Trait</b>                          | <b>Heritability - 2015 temperature</b> | <b>Heritability - 2050 temperature</b> |
|------------------------|---------------------------------------|----------------------------------------|----------------------------------------|
| Early Vigour           | Early Growth Rate 1                   | 0.44                                   | 0.43                                   |
|                        | Early Growth Rate 2                   | 0.08                                   | 0.13                                   |
|                        | Early Vigour – Huan Stage             | 0.56                                   | 0.49                                   |
|                        | Early Vigour - # Tillers              | 0.15                                   | 0.30                                   |
|                        | Early Vigour – Leaf 3 Width           | 0.53                                   | 0.48                                   |
|                        | Early Vigour – Leaf 3 Length          | 0.70                                   | 0.63                                   |
|                        | Early Vigour – Seedling Height        | 0.79                                   | 0.84                                   |
| Energy                 | Photosynthetic Efficiency             | 0.24                                   | 0.26                                   |
|                        | Respiration (per unit area)           | 0.14                                   | 0.15                                   |
|                        | Respiration (per unit DM)             | *                                      | 0.21                                   |
|                        | Energy Use Efficiency 1               | 0.15                                   | 0.23                                   |
|                        | Energy Use Efficiency 2               | 0.62                                   | 0.56                                   |
|                        | Energy Use Efficiency 3               | 0.42                                   | 0.32                                   |
|                        | Energy Use Efficiency 4               | 0.61                                   | 0.57                                   |
| Ear Emergence          | Ear Emergence (days)                  | 0.92                                   | 0.88                                   |
|                        | Ear Emergence (TT)                    | 0.92                                   | 0.89                                   |
|                        | Ear Emergence (PTU)                   | 0.92                                   | 0.89                                   |
| Growth and Development | Biomass at Ear Emergence              | 0.62                                   | 0.53                                   |
|                        | Height at Ear Emergence               | 0.57                                   | 0.57                                   |
|                        | Tiller Number at Ear Emergence        | 0.48                                   | 0.37                                   |
|                        | Seedling Emergence (TT)               | 0.21                                   | 0.18                                   |
|                        | Phyllachron Interval (TT)             | 0.46                                   | 0.42                                   |
|                        | Phyllachron Interval (PTU)            | 0.45                                   | 0.44                                   |
|                        | Final Growth Efficiency 1 (g/unit TT) | 0.40                                   | 0.17                                   |
|                        | Final Growth Efficiency 2 (g/PTU)     | 0.39                                   | 0.38                                   |

NB: Heritability calculations for BVZ0055 calculated from all data

S14. Histograms of all traits in 2015 temperature and 2050 temperature climate experiment

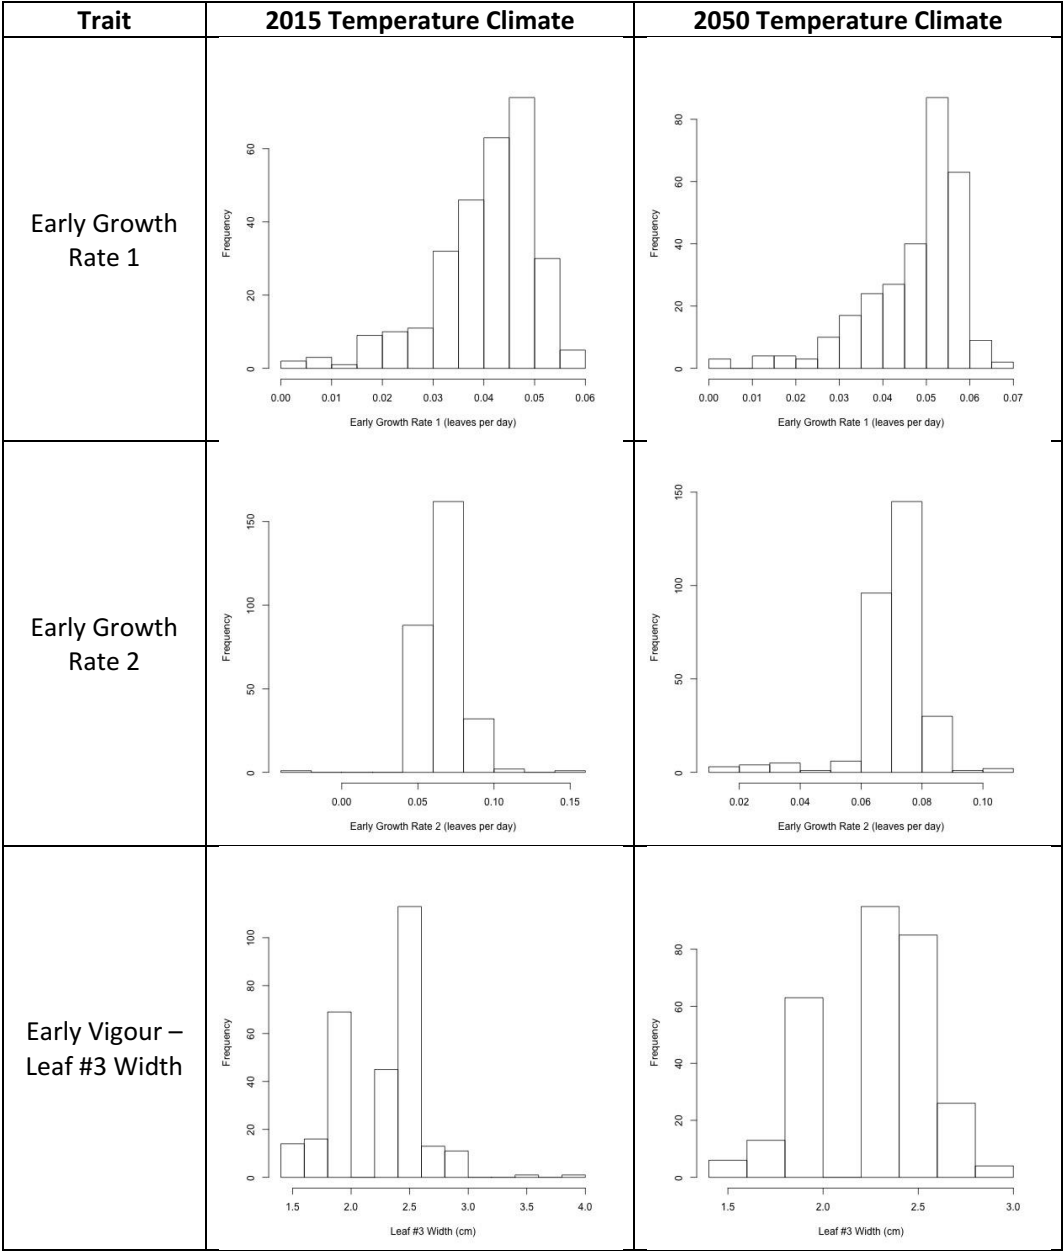

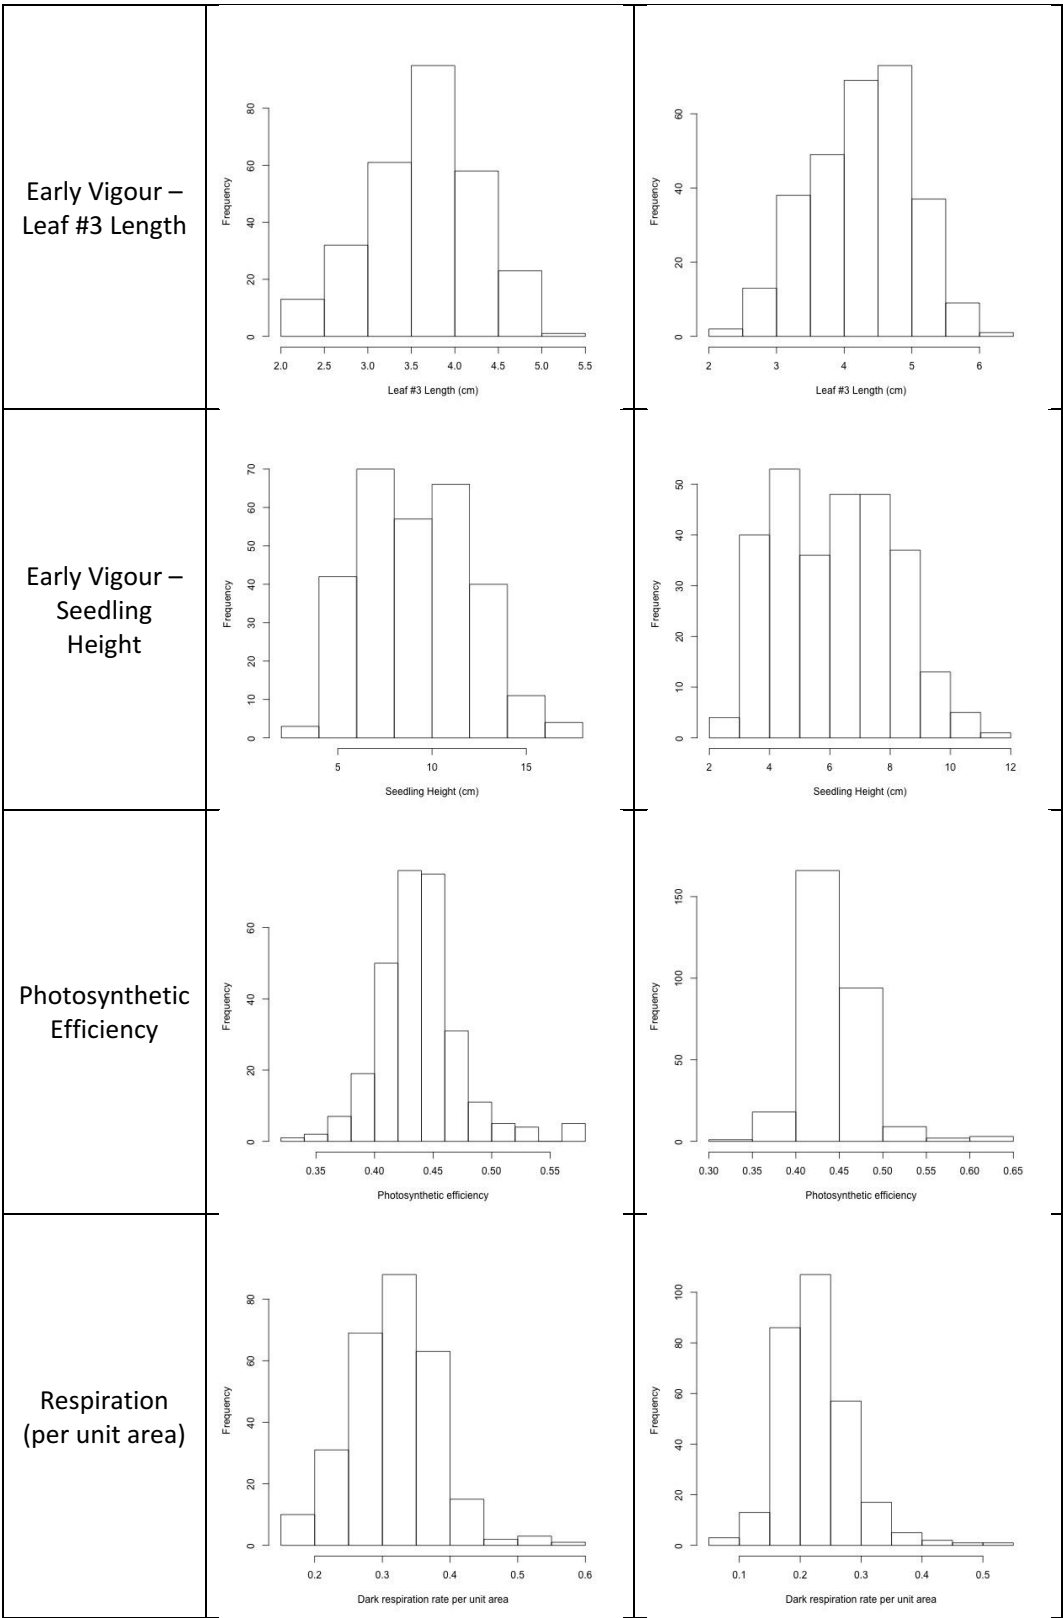

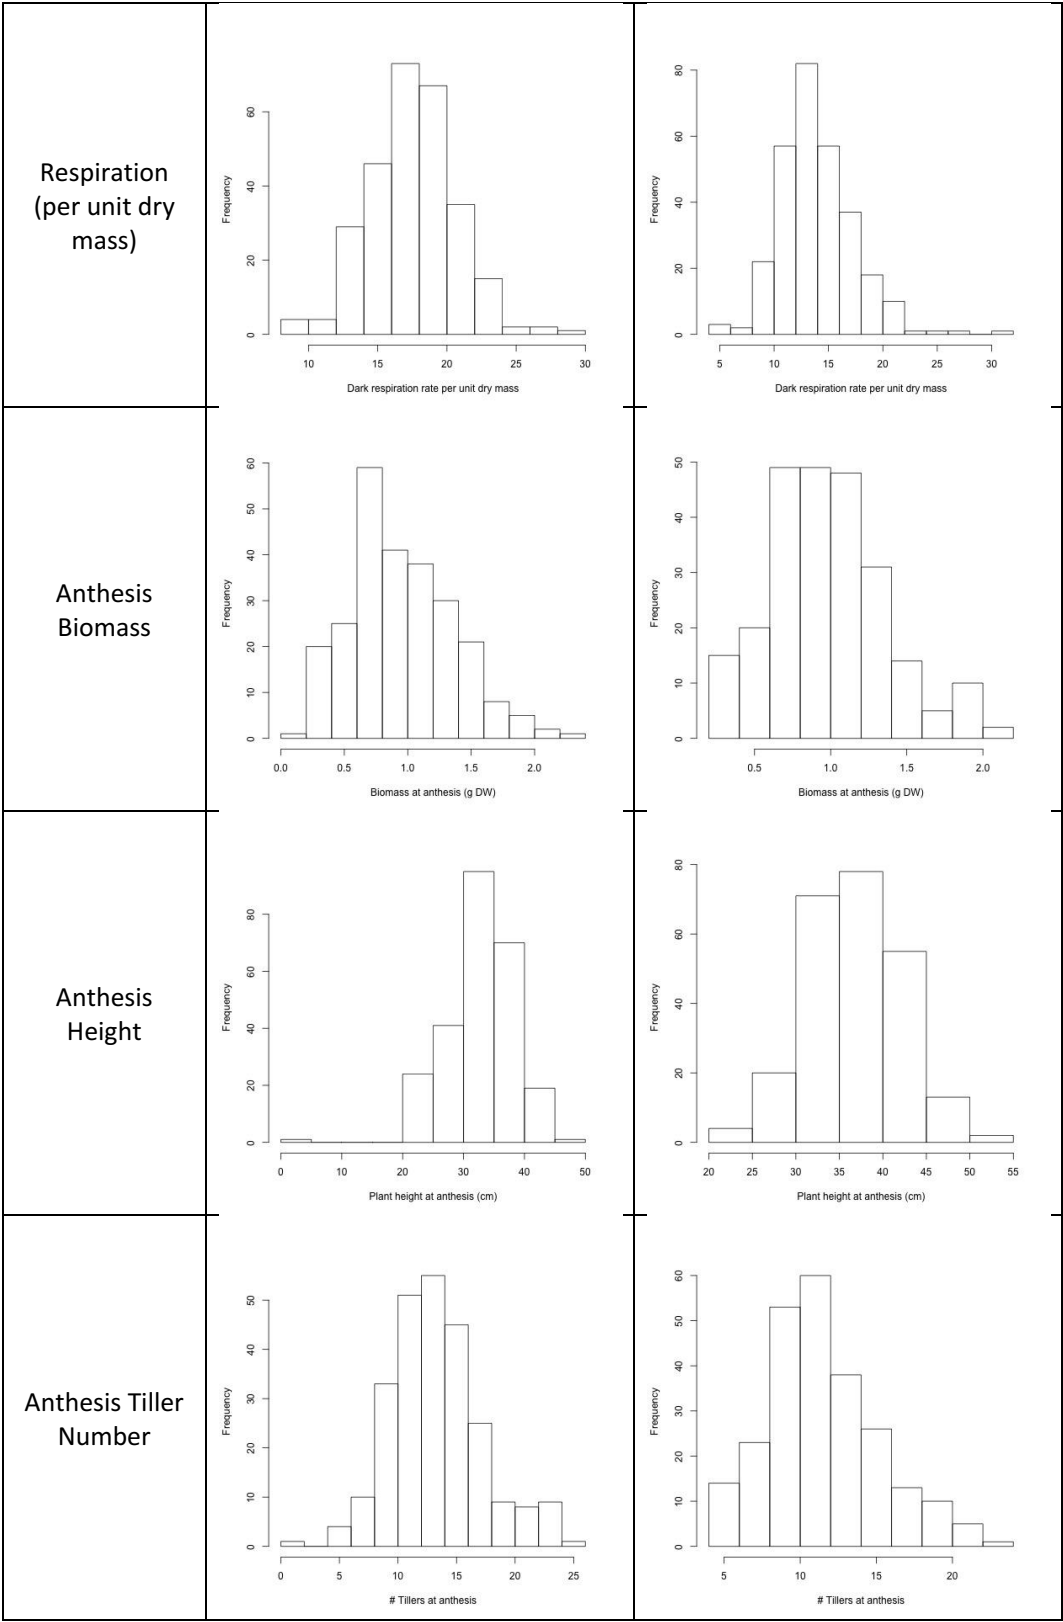

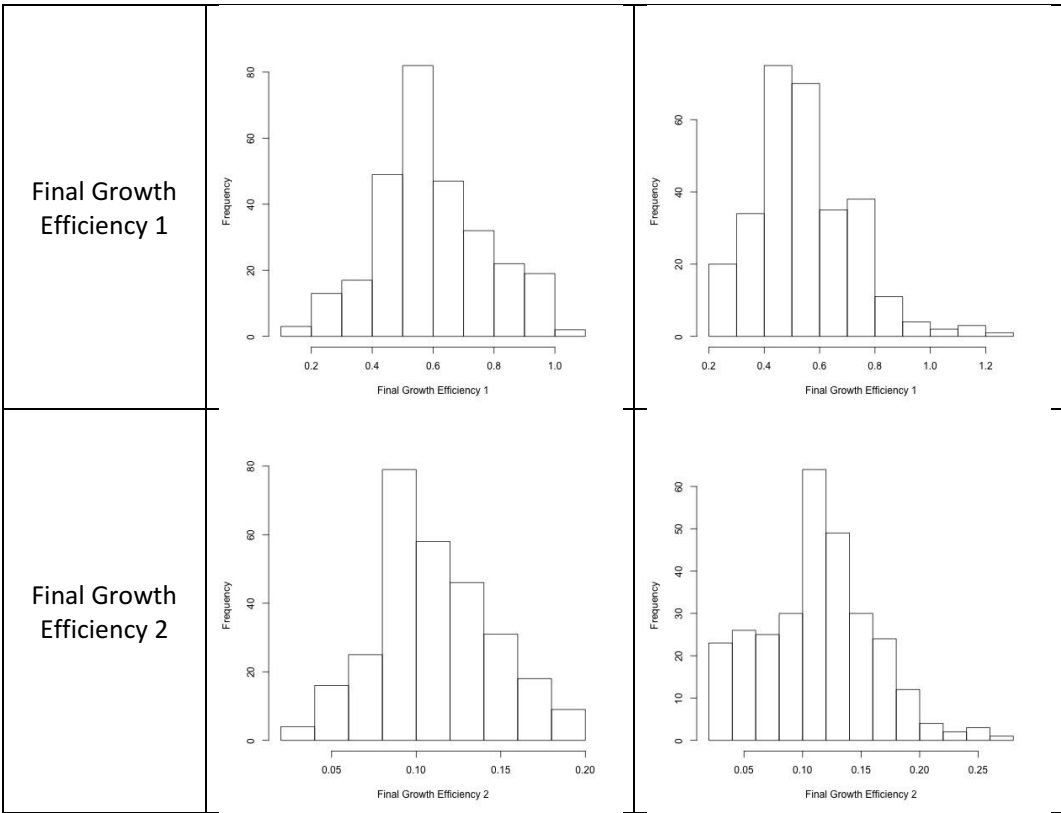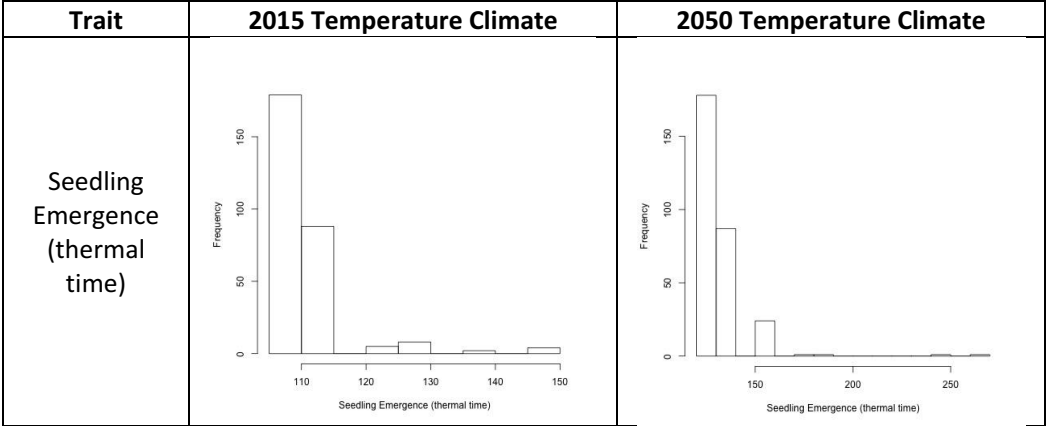

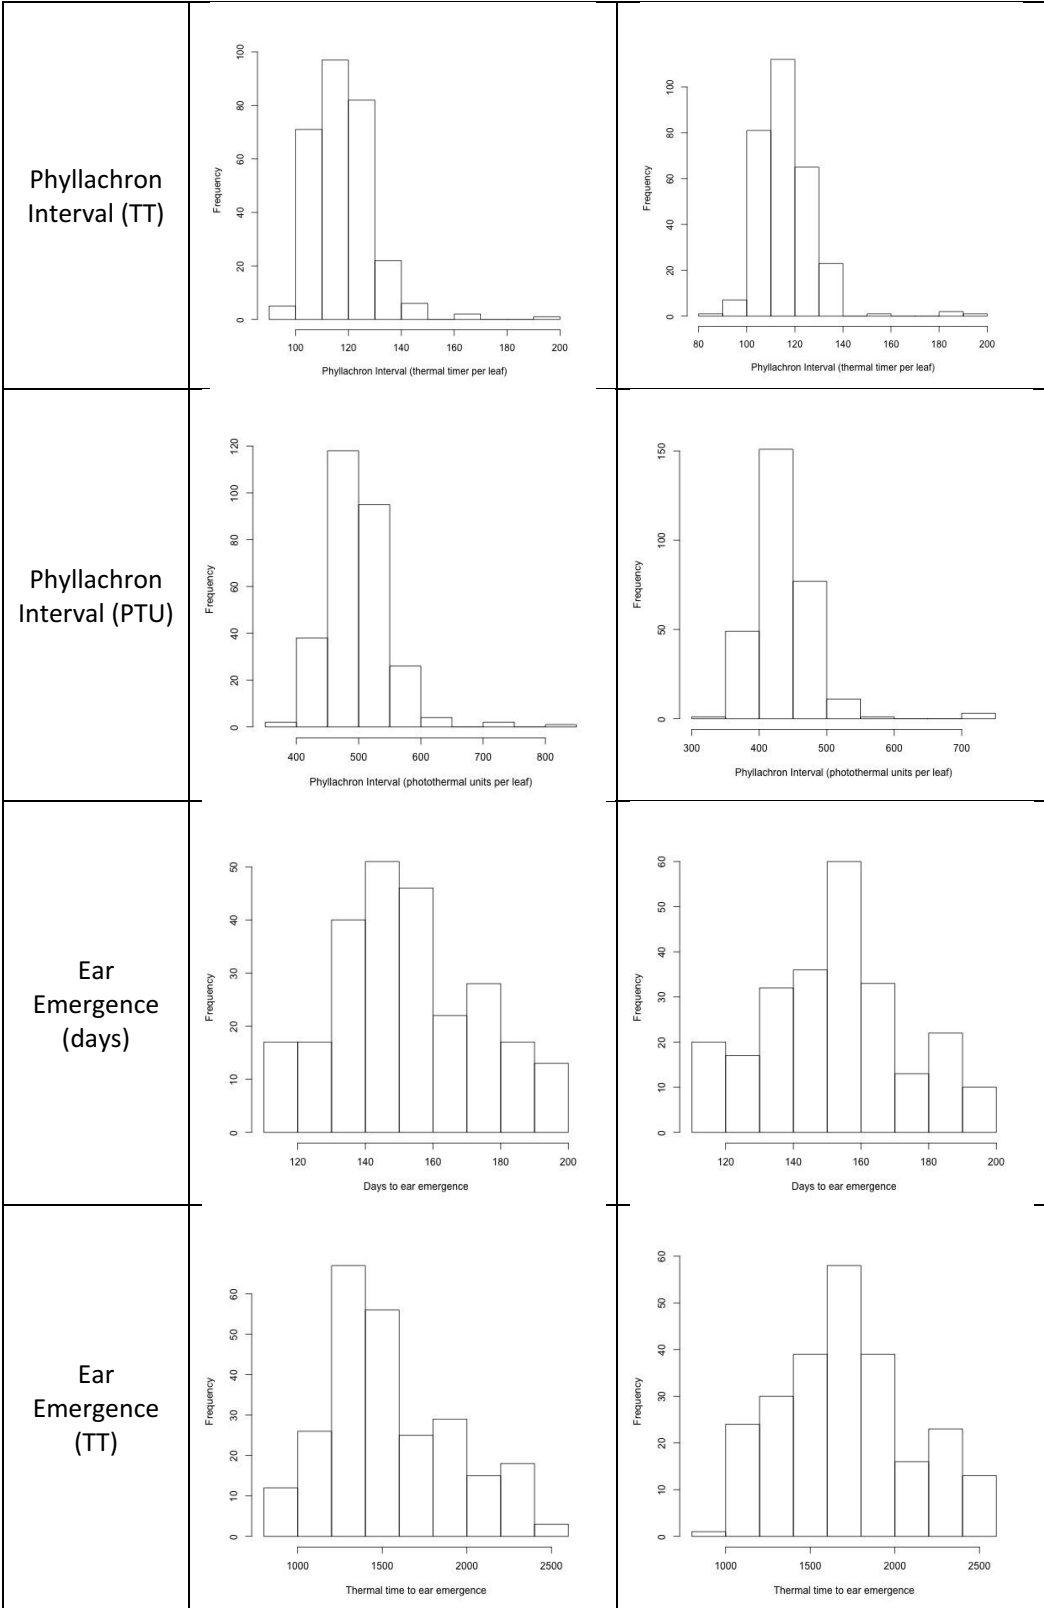

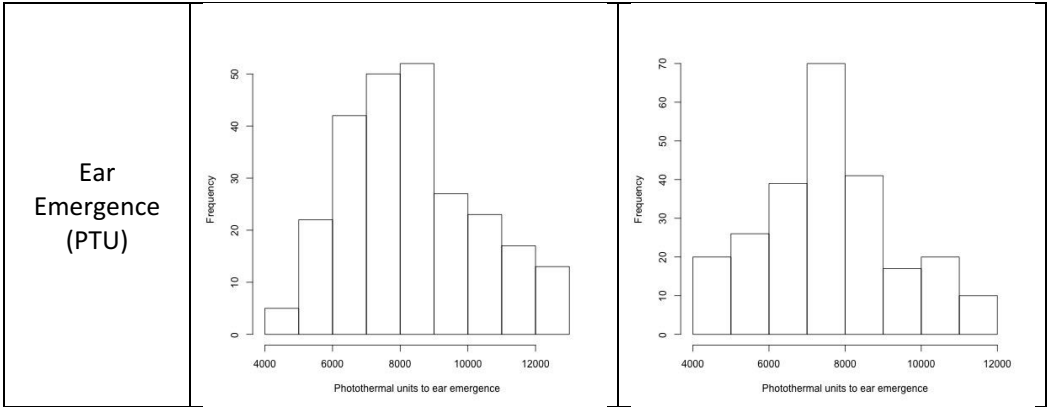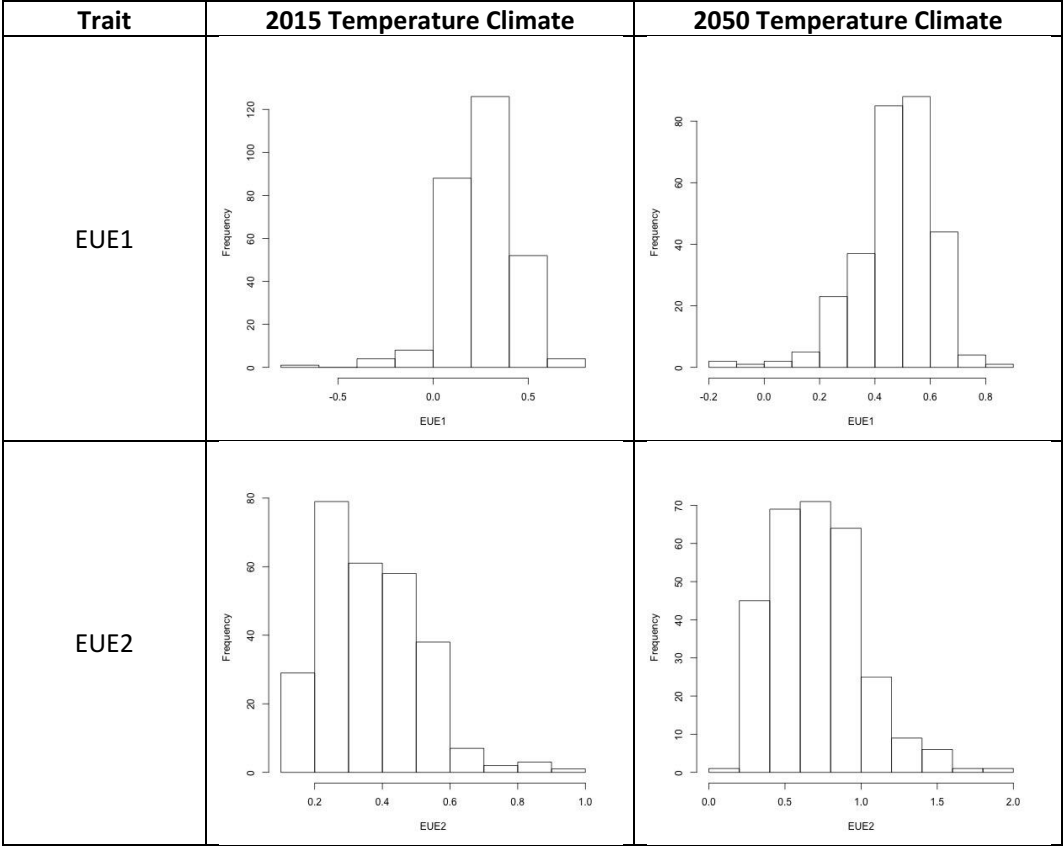

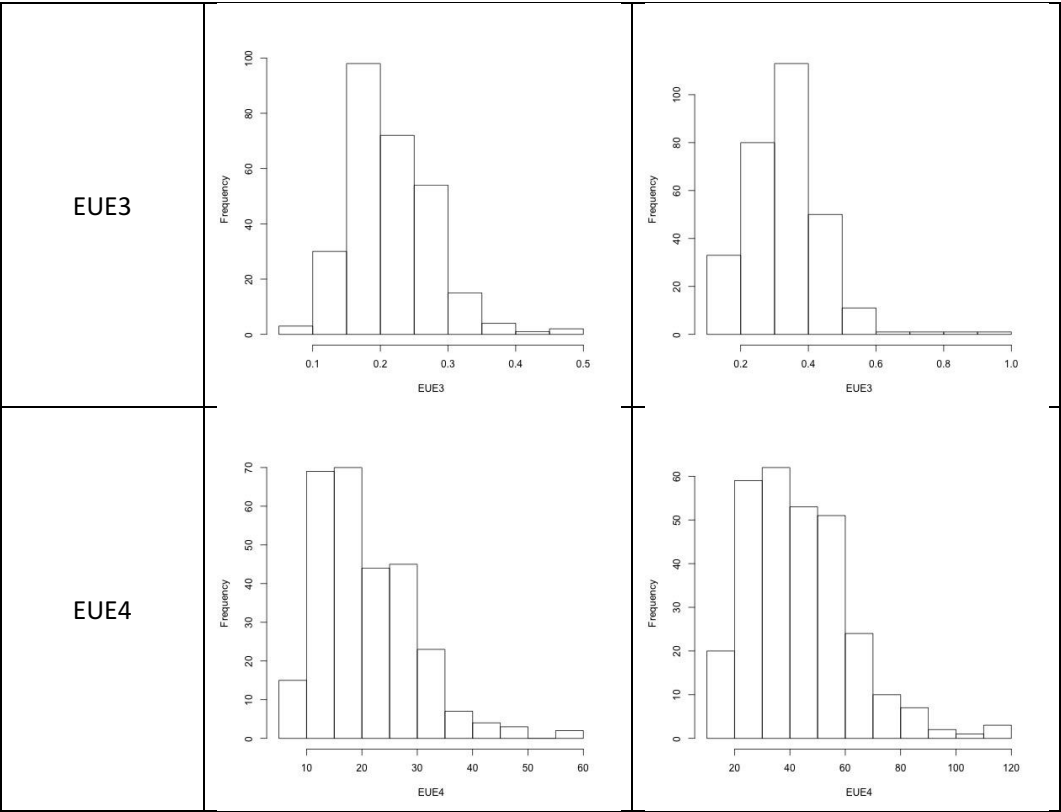



S15. List of QTL identified for traits of interest in 2015 temperature and 2050 temperature climate experiment

| QTL             | Locus ID    | LOD score for conditions and traits where QTL is significant |      |     |                  |      |      |                   |      |     |
|-----------------|-------------|--------------------------------------------------------------|------|-----|------------------|------|------|-------------------|------|-----|
|                 |             | 2015 Temperature                                             |      |     | 2050 Temperature |      |      | Temperature G x E |      |     |
|                 |             | Days                                                         | TT   | PTU | Days             | TT   | PTU  | Days              | TT   | PTU |
| EarEmerg_QTL2.1 | s2_31474143 |                                                              |      |     |                  |      |      | 4.81              | 4.56 |     |
| EarEmerg_QTL3.1 | s3_00392324 |                                                              |      |     |                  | 4.46 |      |                   |      |     |
| EarEmerg_QTL4.1 | s4_02984287 |                                                              |      |     |                  |      |      | 4.44              |      |     |
| EarEmerg_QTL4.2 | s4_08616700 |                                                              | 4.44 |     |                  |      |      |                   |      |     |
| EarEmerg_QTL4.3 | s4_13237914 |                                                              |      |     |                  |      |      | 4.92              |      |     |
| EarEmerg_QTL5.1 | s5_07006866 |                                                              |      |     |                  |      |      | 5.22              |      |     |
| EarEmerg_QTL5.2 | s5_09698141 |                                                              |      |     |                  |      |      | 5.22              |      |     |
| EarEmerg_QTL5.3 | s5_20347474 |                                                              |      |     | 5.06             | 5.01 | 5.01 |                   |      |     |



[illegible]

## Energy QTLs

[illegible]

[illegible]

| QTL             | Locus ID    | LOD score for conditions and traits where QTL is significant |        |        |       |       |      |       |          |                  |        |       |       |       |       |       |      |       |      |  |      |      |      |  |  |
|-----------------|-------------|--------------------------------------------------------------|--------|--------|-------|-------|------|-------|----------|------------------|--------|-------|-------|-------|-------|-------|------|-------|------|--|------|------|------|--|--|
|                 |             | 2015 Temperature                                             |        |        |       |       |      |       |          | 2050 Temperature |        |       |       |       |       |       |      | G x E |      |  |      |      |      |  |  |
|                 |             | Rd_ area                                                     | Rd_ DM | Avg QY | EUE 1 | EUE 2 | EUE3 | EUE 4 | Rd_ area | Rd_ DM           | Avg QY | EUE 1 | EUE 2 | EUE 3 | EUE 4 | EUE 1 | EUE2 | EUE3  | EUE4 |  |      |      |      |  |  |
| Energy_ QTL3.11 | s3_22178931 | 4.83                                                         |        |        |       |       |      |       |          |                  |        |       |       |       |       |       |      |       |      |  |      |      |      |  |  |
| Energy_ QTL3.12 | s3_21991169 |                                                              |        |        |       | 4.63  |      | 4.31  |          |                  |        |       |       |       |       |       |      |       |      |  |      |      |      |  |  |
| Energy_ QTL3.13 | s3_26318303 |                                                              |        |        |       |       |      |       |          |                  |        |       |       |       |       |       |      |       |      |  |      |      |      |  |  |
| Energy_ QTL3.14 | s3_29452743 |                                                              |        |        |       |       |      |       |          |                  |        |       |       |       |       |       |      |       |      |  |      |      |      |  |  |
| Energy_ QTL3.15 | s3_36443490 |                                                              |        |        |       |       |      |       |          | 4.99             |        |       |       |       |       |       |      |       |      |  |      |      |      |  |  |
| Energy_ QTL3.16 | s3_38770516 |                                                              |        |        |       |       |      |       |          |                  |        |       |       |       |       |       |      |       |      |  |      |      |      |  |  |
| Energy_ QTL3.17 | s3_43426288 |                                                              |        |        |       |       |      |       |          | 5.49             |        | 5.62  |       |       |       |       |      |       |      |  |      |      |      |  |  |
| Energy_ QTL4.1  | s4_04046773 |                                                              |        |        |       |       |      |       |          | 4.46             |        |       |       |       |       |       |      |       |      |  |      |      |      |  |  |
| Energy_ QTL4.2  | s4_09202179 |                                                              |        |        |       |       |      |       |          |                  |        |       |       |       |       |       |      |       |      |  | 4.54 |      |      |  |  |
| Energy_ QTL4.3  | s4_09599265 |                                                              |        | 4.60   |       |       |      |       |          |                  |        |       |       |       |       |       |      |       |      |  |      |      |      |  |  |
| Energy_ QTL4.4  | s4_12956633 |                                                              |        |        |       |       |      |       |          |                  | 5.37 1 |       |       |       |       |       |      |       |      |  |      |      |      |  |  |
| Energy_ QTL4.5  | s4_13096699 |                                                              |        |        |       |       |      |       |          |                  |        |       |       | 4.80  |       |       |      |       |      |  |      |      |      |  |  |
| Energy_ QTL4.6  | s4_13189084 |                                                              |        |        |       |       |      |       |          |                  |        |       |       |       |       |       |      |       |      |  |      |      | 4.54 |  |  |
| Energy_ QTL4.7  | s4_13379767 |                                                              |        |        |       |       |      |       |          |                  |        |       |       |       |       |       |      |       |      |  |      | 5.26 |      |  |  |
| Energy_ QTL5.1  | s5_01570510 |                                                              |        |        |       |       |      |       |          |                  |        |       |       |       |       |       | 4.90 |       |      |  | 4.45 |      |      |  |  |
| Energy_ QTL5.2  | s5_04535375 |                                                              |        |        |       |       |      |       |          | 5.17             | 4.37   |       |       |       |       |       |      |       |      |  |      |      |      |  |  |
| Energy_ QTL5.3  | s5_22500232 |                                                              |        |        |       |       |      |       |          | 5.04             |        |       |       |       |       |       |      |       |      |  |      |      |      |  |  |

S16: Manhattan Plots for all traits in 2015 temperature and 2050 temperature climate experiment

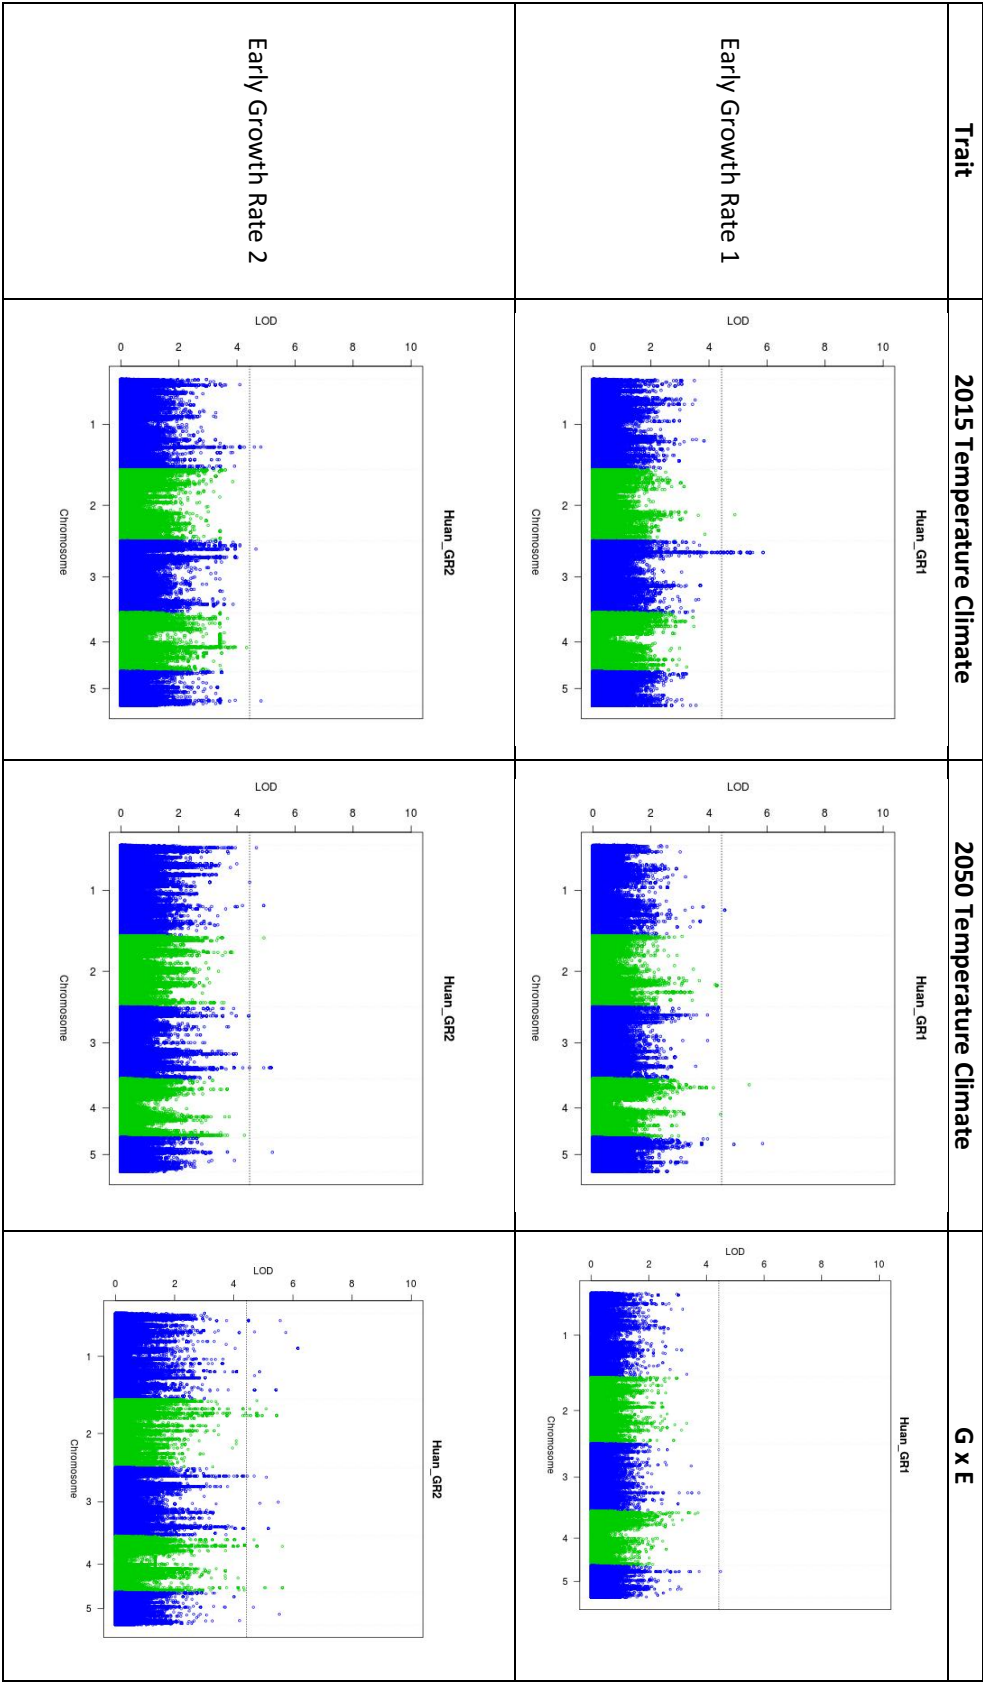

| Trait                        | 2015 Temperature Climate                                                            | 2050 Temperature Climate                                                             | G x E                                                                                |
|------------------------------|-------------------------------------------------------------------------------------|--------------------------------------------------------------------------------------|--------------------------------------------------------------------------------------|
| Early Vigour – Leaf 3 Width  | 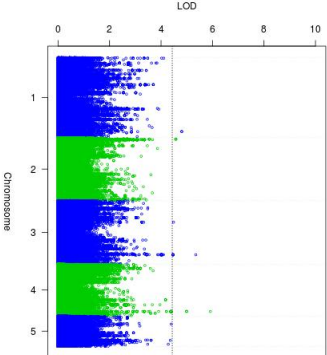 |  |  |
| Early Vigour – Leaf 3 Length |   |   |   |



| Trait                          | 2015 Temperature Climate                                                            | 2050 Temperature                                                                     | G x E |
|--------------------------------|-------------------------------------------------------------------------------------|--------------------------------------------------------------------------------------|-------|
| Early Vigour – Seedling Height | 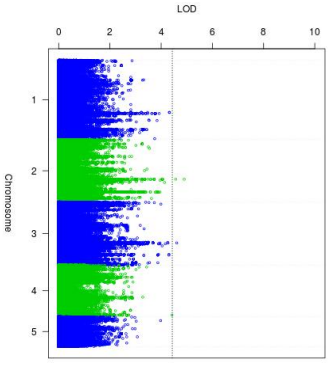 |  | NA    |
| Early Vigour - Huan Score      |   |   | NA    |

|                               |                                                                                                                                                                                                                                                                                                                                                                                                                                                                                                                                                         |
|-------------------------------|---------------------------------------------------------------------------------------------------------------------------------------------------------------------------------------------------------------------------------------------------------------------------------------------------------------------------------------------------------------------------------------------------------------------------------------------------------------------------------------------------------------------------------------------------------|
| Early Vigour - Number Tillers | 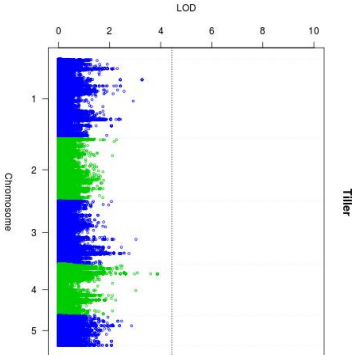 <p>A Manhattan plot showing the association of genetic markers with 'Early Vigour - Number Tillers'. The y-axis is labeled 'Tiller' and ranges from 0 to 10. The x-axis is labeled 'Chromosome' and ranges from 1 to 5. A vertical dashed line is at LOD = 4. The plot shows a dense cluster of blue points on chromosome 1, with a few green points on chromosomes 2, 3, 4, and 5. The highest peak is on chromosome 1, reaching an LOD of approximately 4.5.</p>   |
|                               |  <p>A Manhattan plot showing the association of genetic markers with 'Early Vigour - Number Tillers'. The y-axis is labeled 'Tiller' and ranges from 0 to 10. The x-axis is labeled 'Chromosome' and ranges from 1 to 5. A vertical dashed line is at LOD = 4. The plot shows a dense cluster of blue points on chromosome 1, with a few green points on chromosomes 2, 3, 4, and 5. The highest peak is on chromosome 1, reaching an LOD of approximately 4.5.</p> |
| NA                            |                                                                                                                                                                                                                                                                                                                                                                                                                                                                                                                                                         |

| Trait            | 2015 Temperature Climate                                                           | 2050 Temperature Climate                                                             | G x E                                                                                |
|------------------|------------------------------------------------------------------------------------|--------------------------------------------------------------------------------------|--------------------------------------------------------------------------------------|
| Anthesis Biomass | 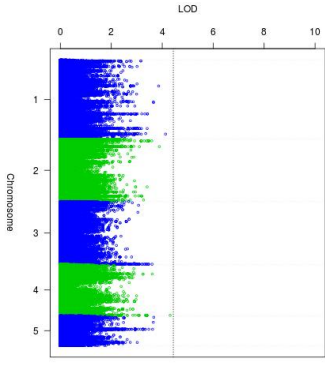 |  |  |
| Anthesis Height  |   |   |   |

| Trait                     | 2015 Temperature Climate |  |  | 2050 Temperature Climate | G x E |
|---------------------------|--------------------------|--|--|--------------------------|-------|
| Anthesis Tiller Number    |                          |  |  |                          |       |
| Final Growth Efficiency 1 |                          |  |  |                          |       |

| Trait                     | 2015 Temperature Climate                                                            | 2050 Temperature Climate                                                             | G x E                                                                                |
|---------------------------|-------------------------------------------------------------------------------------|--------------------------------------------------------------------------------------|--------------------------------------------------------------------------------------|
| Final Growth Efficiency 2 | 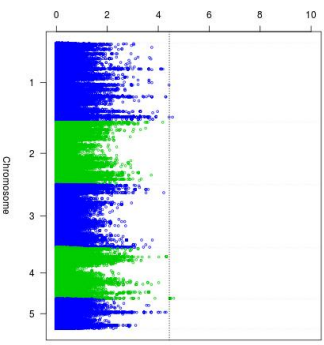 |  |  |
| Seedling Emergence (TT)   |   |   |   |

| Trait                      | 2015 Temperature Climate                                                                                                                         | 2050 Temperature Climate                                                                                                             | G x E                                                                                                                                |
|----------------------------|--------------------------------------------------------------------------------------------------------------------------------------------------|--------------------------------------------------------------------------------------------------------------------------------------|--------------------------------------------------------------------------------------------------------------------------------------|
| Phyllachron Interval (TT)  | <p data-bbox="921 306 949 586">Phyllachron Interval (TT)</p> 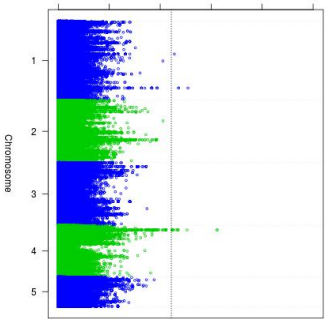 | <p data-bbox="1096 1239 1118 1290">Phyll_TT</p>  | <p data-bbox="1103 1641 1125 1692">Phyll_TT</p>  |
| Phyllachron Interval (PTU) | <p data-bbox="692 835 714 886">Phyll_PTU</p>                   | <p data-bbox="692 1239 714 1290">Phyll_PTU</p>    | <p data-bbox="699 1641 721 1692">Phyll_PTU</p>    |

| Trait                | 2015 Temperature Climate                                                            | 2050 Temperature Climate                                                             | G x E                                                                                |
|----------------------|-------------------------------------------------------------------------------------|--------------------------------------------------------------------------------------|--------------------------------------------------------------------------------------|
| Ear Emergence (days) | 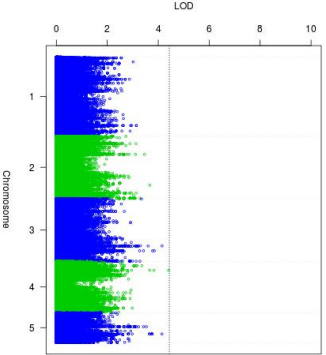 |  |  |
| Ear Emergence (TT)   |   |   |   |

| Trait                     | 2015 Temperature Climate                                                                               | 2050 Temperature Climate                                                                                 | G x E                                                                                                    |
|---------------------------|--------------------------------------------------------------------------------------------------------|----------------------------------------------------------------------------------------------------------|----------------------------------------------------------------------------------------------------------|
| Ear Emergence (PTU)       | 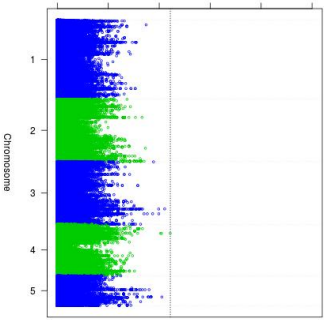 <p>EarEmerg_PTU</p> |  <p>EarEmerg_PTU</p> |  <p>EarEmerg_PTU</p> |
| Photosynthetic Efficiency |  <p>Avg_OY</p>        |  <p>Avg_OY</p>        |  <p>Avg_OY</p>        |



| Trait                       | 2015 Temperature Climate                                                            | 2050 Temperature Climate                                                             | G x E                                                                                |
|-----------------------------|-------------------------------------------------------------------------------------|--------------------------------------------------------------------------------------|--------------------------------------------------------------------------------------|
| Respiration (per unit area) | 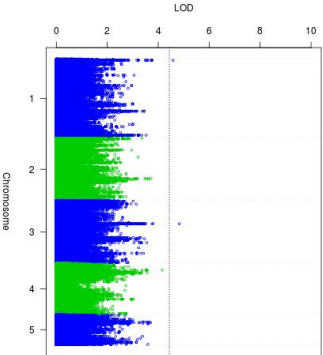 |  |  |
| Respiration (per unit DM)   |   |   |   |

| Trait | 2015 Temperature Climate                                                           | 2050 Temperature Climate                                                             | G x E                                                                                |
|-------|------------------------------------------------------------------------------------|--------------------------------------------------------------------------------------|--------------------------------------------------------------------------------------|
| EUE1  | 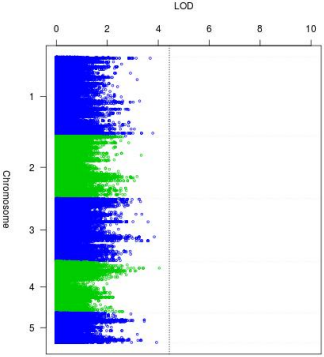 |  |  |
| EUE2  |   |   |   |

| Trait | 2015 Temperature Climate                                                           | 2050 Temperature Climate                                                             | G x E                                                                                |
|-------|------------------------------------------------------------------------------------|--------------------------------------------------------------------------------------|--------------------------------------------------------------------------------------|
| EUE3  | 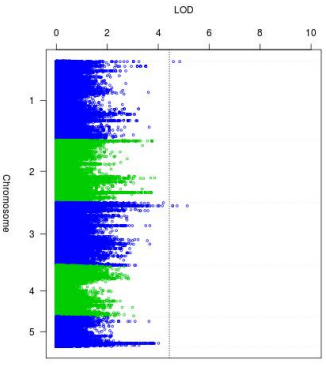 |  |  |
| EUE4  |   |   |   |

S17. List of candidate genes for strong ear emergence QTL

| QTL             | Candidate Gene | Gene Location (bp)  | Distance from QTL (bp) | Description                                                                                | Rice Protein Homologs                                                                          | Arabidopsis Homologs                                                           |
|-----------------|----------------|---------------------|------------------------|--------------------------------------------------------------------------------------------|------------------------------------------------------------------------------------------------|--------------------------------------------------------------------------------|
| EarEmerg_QTL5.3 | Bradi5g16900   | 20307500 - 20312116 | 35 358                 | Glycosyl hydrolase (GH), subfamily GH32                                                    | LOC_Os04g45290.1 - glycosyl hydrolases, putative, expressed (61%)                              | AT1G62660.1 - Glycosyl hydrolases family 32 protein(62.7%)                     |
|                 | Bradi5g16910   | 20326042 - 20328526 | 18 948                 | YABBY transcription factor                                                                 | LOC_Os04g45330.1 - YABBY14 protein, putative, expressed (76%)                                  | AT2G45190.1 - Plant-specific transcription factor YABBY family protein (45.3%) |
|                 | Bradi5g16917   | 20332204 - 20335948 | 11 526                 | No apical meristem (NAM) protein                                                           | LOC_Os02g42970.1 - NAC domain containing protein, putative, expressed (67%)                    | AT1G12260.1 - NAC 007 (66.8%)                                                  |
|                 | Bradi5g16930   | 20342797 - 20343495 | 3 979                  | RIM domain containing protein similar to putative RNA recognition motif containing protein | LOC_Os06g13839.1 - RNA recognition motif containing protein, putative, expressed (59%)         | AT1G71800.1 - cleavage stimulating factor 64 (17.7%)                           |
|                 | Bradi5g16935   | 20345479 - 20345819 | 1 655                  | Expressed gene                                                                             | None available                                                                                 | None available                                                                 |
|                 | Bradi5g16940   | 20349458 - 20350336 | 1 984                  | AUXIN-REGULATED PROTEIN-RELATED                                                            | LOC_Os02g42990.1 - OsSAUR11 - Auxin-responsive SAUR gene family member, expressed (30%)        | AT3G60690.1 - SAUR-like auxin-responsive protein family (24.9%)                |
|                 | Bradi5g16950   | 20354677 - 20357924 | 7 203                  | CYSTEINE-RICH REPEAT SECRETORY PROTEIN                                                     | LOC_Os04g45460.1 - cysteine-rich repeat secretory protein precursor, putative, expressed (66%) | AT3G60720.1 - plasmodesmata-located protein 8 (45.7%)                          |
|                 | Bradi5g16960   | 20357202 - 20362127 | 9 728                  | HEMOGLOBINASE FAMILY MEMBER                                                                | LOC_Os04g45470.1 - vacuolar-processing enzyme precursor,                                       | AT1G62710.1 - beta vacuolar processing enzyme (59.6%)                          |

|              |                        |        |                                                       |                                                                                                       |                                                                          |
|--------------|------------------------|--------|-------------------------------------------------------|-------------------------------------------------------------------------------------------------------|--------------------------------------------------------------------------|
|              |                        |        |                                                       | putative, expressed (72%)                                                                             |                                                                          |
| Bradi5g16970 | 20364622 -<br>20368114 | 17 148 | HSP70-HSP90<br>ORGANIZING PROTEIN 1-<br>RELATED       | LOC_Os02g43020.1 - heat shock<br>protein S7I, putative, expressed<br>(89%)                            | AT1G62740.1 - stress-inducible protein,<br>putative (81.5%)              |
| Bradi5g16980 | 20367655 -<br>20372866 | 20 181 | GTPase activity                                       | LOC_Os04g45490.1 - elongation<br>factor, putative, expressed (87%)                                    | AT1G62750.1 - Translation elongation<br>factor EFg/EF2 protein (85.4%)   |
| Bradi5g16990 | 20375286 -<br>20376509 | 27 812 | ferrous iron<br>transmembrane<br>transporter activity | LOC_Os04g45520.1 - integral<br>membrane protein, putative,<br>expressed (53%)                         | AT3G643630.1 - Vacuolar iron<br>transporter (VIT) family protein (48.8%) |
| Bradi5g17000 | 20378484 -<br>20384475 | 31 010 | nuclear hormone<br>receptor binding                   | LOC_Os04g45570.1 - expressed<br>protein (79%)                                                         | AT3G49590.2 - Autophagy-related<br>protein 13 (35.4%)                    |
| Bradi5g17010 | 20389545 -<br>20389880 | 42 071 | Auxin responsive protein                              | LOC_Os10g36703.1 - CPuORF40 -<br>conserved peptide uORF-<br>containing transcript, expressed<br>(32%) | none                                                                     |
| Bradi5g17020 | 20390119 -<br>20395891 | 42 645 | plus-end-directed<br>microtubule motor<br>activity    | LOC_Os04g45580.1 - kinesin<br>motor domain containing<br>protein, expressed (88%)                     | AT2G21300.2 - ATP binding microtubule<br>motor family protein (62.8%)    |

S18. List of candidate genes for strong early vigour QTL

| QTL                                 | Candidate Gene | Gene Location (bp) | Distance from QTL (bp) | Description                                                       | Rice Protein Homologs                                                                  | Arabidopsis Protein Homolog                                                                     |
|-------------------------------------|----------------|--------------------|------------------------|-------------------------------------------------------------------|----------------------------------------------------------------------------------------|-------------------------------------------------------------------------------------------------|
| EarlyVigour_QTL1.1<br>(s1_00506881) | Bradi1g00567   | 453524 - 460935    | 45946                  | WD40 REPEAT PROTEIN // SUBFAMILY NOT NAMED                        | LOC_Os03g64300.1 - THION30 - Plant thionin family protein precursor, expressed (87.9%) | AT2G32700.6 - LEUNIG_homolog (68.1%)                                                            |
|                                     | Bradi1g00580   | 461063 - 467208    | 39673                  | protein kinase family protein, putative, expressed, subfamily Raf | LOC_Os07g25680.1 - protein kinase domain containing protein, expressed (71.2%)         | AT1G79570.1 - Protein kinase superfamily protein with octicosapeptide/Phox/Bem1p domain (57.5%) |
|                                     | Bradi1g00587   | 469432 - 472049    | 34832                  | DIMETHYLANILINE MONOOXYGENASE // SUBFAMILY NOT NAMED              | LOC_Os07g25540.1 - flavin monooxygenase, putative, expressed (66.6%)                   | AT1G04610.1 - YUCCA 3 (59.3%)                                                                   |
|                                     | Bradi1g00600   | 479483 - 480393    | 26488                  | AWPM-19-LIKE FAMILY PROTEIN                                       | LOC_Os07g24000.1 - AWPM-19-like membrane family protein, putative, expressed (73.7%)   | AT1G04560.1 - AWPM-19-like family protein (60.3%)                                               |
|                                     | Bradi1g00607   | 482858 - 497592    | 9289                   | MYOSIN                                                            | LOC_Os03g64290.1 - myosin, putative, expressed (90.6%)                                 | AT1G04160.1 - myosin XI B (78.1%)                                                               |
|                                     | Bradi1g00620   | 498552 - 500965    | 5916                   | ISG15 ligase activity, ubiquitin-protein ligase activity          | LOC_Os10g31000.1 - ubiquitin-conjugating enzyme, putative, expressed (86.6%)           | AT1G63800.1 - ubiquitin-conjugating enzyme 5 (74.7%)                                            |
|                                     | Bradi1g00625   | 500986 - 501500    | 5381                   | No description                                                    | None                                                                                   | None                                                                                            |
|                                     | Bradi1g00630   | 501413 - 501868    | 5013                   | No description                                                    | None                                                                                   | None                                                                                            |

|  |                     |                        |              |                                                                                                          |                                                                                            |                                                                           |
|--|---------------------|------------------------|--------------|----------------------------------------------------------------------------------------------------------|--------------------------------------------------------------------------------------------|---------------------------------------------------------------------------|
|  | Bradi1g00642        | 505289 - 506860        | 21           | No description                                                                                           | None                                                                                       | None                                                                      |
|  | Bradi1g00654        | 514295 - 517374        | 7414         | Eama-like transporter family                                                                             | LOC_Os08g31130.1 - integral membrane protein DUF6 containing protein, expressed (79.1%)    | AT1G44800.1 - nodulin MtN21 /Eama-like transporter family protein (52.9%) |
|  | <b>Bradi1g00666</b> | <b>519685 - 521001</b> | <b>12804</b> | <b>ethylene-responsive transcription factor 1 (ERF1)</b>                                                 | <b>LOC_Os03g64260.1 - AP2 domain containing protein, expressed (25.4%)</b>                 | <b>AT3G23240.1 - ethylene response factor 1 (29.9%)</b>                   |
|  | Bradi1g00672        | 521910 - 523129        | 15029        | No description                                                                                           | None                                                                                       | None                                                                      |
|  | Bradi1g00678        | 523410 - 527774        | 16529        | THYROID RECEPTOR INTERACTING PROTEIN RELATED                                                             | LOC_Os03g64250.2 - expressed protein (32.2%)                                               | AT2G20410.1 - RNA-binding ASCH domain protein (30.3%)                     |
|  | Bradi1g00690        | 531773 - 534582        | 24892        | myosin phosphatase activity                                                                              | LOC_Os03g16110.1 - Ser/Thr protein phosphatase family protein, putative, expressed (77.6%) | AT2G39840.1 - tyne one serine/threonine protein phosphatase 4 (76.4%)     |
|  | Bradi1g00700        | 539495 - 542936        | 32614        | inorganic phosphate transmembrane transporter activity, manganese ion transmembrane transporter activity | LOC_Os04g10690.1 - inorganic phosphate transporter, putative, expressed (78.6%)            | AT3G54700.1 - phosphate transporter 1;7 (75.6%)                           |
|  | Bradi1g00710        | 544048 - 547886        | 37167        | Leucine-zipper of ternary complex factor MIP1                                                            | LOC_Os03g64230.1 - expressed protein (55.6%)                                               | AT5G60720.1 - Protein of unknown function, DUF547 (40.2%)                 |
|  | Bradi1g00720        | 549976 - 553622        | 43095        | OTU DOMAIN CONTAINING PROTEIN                                                                            | LOC_Os03g64219.1 - OTU-like cysteine protease family                                       | AT5G04250.2 - Cysteine proteinases superfamily                            |

|                                     |                   |                   |                |                                          |                                                                                |                                                        |
|-------------------------------------|-------------------|-------------------|----------------|------------------------------------------|--------------------------------------------------------------------------------|--------------------------------------------------------|
| EarlyVigour_QTL3.1<br>(s3_03204480) |                   |                   |                |                                          | protein, putative, expressed (54.1%)                                           | protein (42.9%)                                        |
|                                     | Bradi1g00730      | 553623 - 558060   | 46742          | ATPase activity, coupled                 | LOC_Os03g64210.1 - T-complex protein, putative, expressed (86.2%)              | AT2G28000.1 - chaperonin-60alpha (84.5%)               |
|                                     | Bradi1g00740      | 555382 - 558935   | 48501          | Enoyl-CoA hydratase 2 / ECH2             | LOC_Os05g09370.3 - kinase, pfkB family, putative, expressed (70.6%)            | AT5G60335.1 - Thioesterase superfamily protein (62.9%) |
|                                     | Bradi3g04580      | 3154480 - 3156693 | 47787          | sugar transmembrane transporter activity | LOC_Os02g06540.1 - transporter family protein, putative, expressed (84.7%)     | AT1G11260.1 - sugar transporter 1 (70.1%)              |
|                                     | Bradi3g04585      | 3158304 - 3160486 | 43994          | Wound-induced protein                    | LOC_Os06g46970.1 - wound induced protein, putative, expressed (78.3%)          | AT4G10265.1 - Wound-responsive family protein (47.8%)  |
|                                     | Bradi3g04590      | 3161033 - 3162956 | 41524          | F-Box                                    | LOC_Os01g32640.1 - OsFBX9 - F-box domain containing protein, expressed (32.0%) | AT3G20620.1 - F-box family protein-related (20.6%)     |
|                                     | Bradi3g04598      | 3165923 - 3169372 | 35108          | No description                           | LOC_Os01g41950.1 - expressed protein (46.8%)                                   | None                                                   |
| Bradi3g04604                        | 3170333 - 3170731 | 33749             | No description | None                                     | None                                                                           |                                                        |
| Bradi3g04611                        | 3173051 - 3175042 | 29438             | No description | None                                     | None                                                                           |                                                        |
| Bradi3g04617                        | 3183006 - 3184040 | 20440             | No description | None                                     | None                                                                           |                                                        |
| Bradi3g04620                        | 3184172 -         | 17484             | F-Box          | LOC_Os01g32640.1 - OsFBX9 -              | AT3G17530.1 - F-box and                                                        |                                                        |



|  |                     |                          |          |                                                            |                                                                                                                                    |                                                                                     |
|--|---------------------|--------------------------|----------|------------------------------------------------------------|------------------------------------------------------------------------------------------------------------------------------------|-------------------------------------------------------------------------------------|
|  |                     | 3186996                  |          |                                                            | F-box domain containing protein, expressed (41.4%)                                                                                 | associated interaction domains-containing protein (31.4%)                           |
|  | Bradi3g04630        | 3187661 - 3192603        | 11877    | CAMK includes calcium/calmodulin dependent protein kinases | LOC_Os02g06570.1 - CAMK_KIN1/SNF1/Nim1_like.1<br>3 - CAMK includes calcium/calmodulin dependent protein kinases, expressed (78.9%) | AT5G07070.1 - CBL-interacting protein kinase 2 (68.8%)                              |
|  | Bradi3g04640        | 3192668 - 3196846        | 7634     | Rho GTPase binding                                         | LOC_Os02g06580.1 - formin, putative, expressed (72.5%)                                                                             | AT5G54650.2 - formin homologY5 (35.8%)                                              |
|  | <b>Bradi3g04650</b> | <b>3198706 - 3204772</b> | <b>0</b> | <b>ATPase activity, coupled</b>                            | <b>LOC_Os02g06584.2 - zinc finger C-x8-C-x5-C-x3-H type family protein, expressed (78.1%)</b>                                      | <b>AT3G21810.1 - Zinc finger C-x8-C-x5-C-x3-H type family protein (30.6%)</b>       |
|  | Bradi3g04655        | 3206978 - 3212873        | 2498     | No description                                             | None                                                                                                                               | None                                                                                |
|  | Bradi3g04660        | 3207821 - 3210064        | 3341     | Leucine-rich repeat protein // Ras suppressor protein      | LOC_Os02g06600.1 - receptor-like protein kinase 2 precursor, putative, expressed (52.1%)                                           | AT1G35710.1 - Protein kinase family protein with leucine-rich repeat domain (51.6%) |
|  | Bradi3g04671        | 3211145 - 3215539        | 6665     | PROPROTEIN CONVERTASE SUBTILISIN/KEXIN                     | LOC_Os09g30250.1 - OsSub58 - Putative Subtilisin homologue, expressed (54.4%)                                                      | AT2G04160.1 - Subtilisin-like serine endopeptidase family protein (56.2%)           |
|  | Bradi3g04681        | 3216712 - 3220903        | 12232    | Leucine Rich Repeat                                        | LOC_Os02g06600.1 - receptor-like protein kinase 2 precursor, putative, expressed (48.8%)                                           | AT1G71400.1 - receptor like protein 12 (43.3%)                                      |
|  | Bradi3g04690        | 3222059 - 3227339        | 17579    | serine-type endopeptidase activity                         | LOC_Os02g10520.1 - OsSub12 - Putative Subtilisin homologue,                                                                        | AT2G04160.1 - Subtilisin-like serine endopeptidase family                           |

|                                     |              |                      |       |                                              |                                                                                                         |                                                                      |
|-------------------------------------|--------------|----------------------|-------|----------------------------------------------|---------------------------------------------------------------------------------------------------------|----------------------------------------------------------------------|
| EarlyVigour_QT13.3<br>(s3_09601708) |              |                      |       |                                              | expressed (51.3%)                                                                                       | protein (51.2%)                                                      |
|                                     | Bradi3g04701 | 3232085 -<br>3232706 | 27605 | No description                               | None                                                                                                    | None                                                                 |
|                                     | Bradi3g04705 | 3234102 -<br>3234683 | 29622 | No description                               | LOC_Os02g15160.1 - OsFBX40 - F-box domain containing protein, expressed (58.1%)                         | None                                                                 |
|                                     | Bradi3g04710 | 3238168 -<br>3240567 | 33688 | Leucine Rich Repeat                          | LOC_Os02g06600.1 - receptor-like protein kinase 2 precursor, putative, expressed (55.5%)                | AT4G04220.1 - receptor like protein 46 (40.3%)                       |
|                                     | Bradi3g04717 | 3240879 -<br>3243367 | 36399 | Peroxidase / Lactoperoxidase                 | LOC_Os02g06630.1 - peroxidase precursor, putative, expressed (75.6%)                                    | AT4G11290.1 - Peroxidase superfamily protein (57.3%)                 |
|                                     | Bradi3g04730 | 3244701 -<br>3247978 | 40221 | ubiquitin-protein ligase activity            | LOC_Os05g42424.1 - ubiquitin family protein, putative, expressed (100%)                                 | AT5G20620.1 - ubiquitin 4 (99.7%)                                    |
|                                     | Bradi3g04737 | 3249676 -<br>3258707 | 45196 | FBD                                          | LOC_Os12g31340.1 - OsFBD15 - F-box and FBD domain containing protein, expressed (48%)                   | AT3G28410.1 - F-box/RN1-like superfamily protein (39.4%)             |
|                                     | Bradi3g11120 | 9554183 -<br>9559683 | 42025 | CONSERVED OLIGOMERIC GOLGI COMPLEX SUBUNIT 4 | LOC_Os02g25840.1 - conserved oligomeric Golgi complex component 4, related, putative, expressed (65.7%) | AT4G01400.2 (67.4%)                                                  |
|                                     | Bradi3g11130 | 9559943 -<br>9567535 | 34173 | diaminopimelate decarboxylase activity       | LOC_Os02g24354.1 - pyridoxal-dependent decarboxylase protein, putative, expressed (80.2%)               | AT5G11880.1 - Pyridoxal-dependent decarboxylase family protein (77%) |
|                                     |              |                      |       |                                              |                                                                                                         |                                                                      |

|  |              |                   |       |                                                                               |                                                                                |                                                                                                |
|--|--------------|-------------------|-------|-------------------------------------------------------------------------------|--------------------------------------------------------------------------------|------------------------------------------------------------------------------------------------|
|  | Bradi3g11140 | 9570245 - 9575774 | 25934 | phosphatidylcholine transmembrane transporter activity                        | LOC_Os10g03400.2 - phosphatidylinositol transfer, putative, expressed (84.2%)  | AT4G39170.1 - Sec14p-like phosphatidylinositol transfer family protein (65.7%)                 |
|  | Bradi3g11145 | 9583051 - 9584271 | 17437 | No description                                                                | LOC_Os02g25820.1 - B3 DNA binding domain containing protein, expressed (25.8%) | AT4G01500.1 - AP2/B3-like transcriptional factor family protein (19.3%)                        |
|  | Bradi3g11150 | 9588169 - 9590496 | 11212 | S-ADENOSYL-L-METHIONINE-DEPENDENT METHYLTRANSFERASE DOMAIN-CONTAINING PROTEIN | LOC_Os03g03470.2 - expressed protein (37.5%)                                   | AT5G63100.1 - S-adenosyl-L-methionine-dependent methyltransferases superfamily protein (50.8%) |
|  | Bradi3g11156 | 9591855 - 9592133 | 9575  | No description                                                                | LOC_Os02g24240.1 - expressed protein (46.7%)                                   | None                                                                                           |
|  | Bradi3g11163 | 9592708 - 9593625 | 8083  | No description                                                                | None                                                                           | None                                                                                           |
|  | Bradi3g11170 | 9596208 - 9597278 | 4430  | No description                                                                | LOC_Os01g15610.1 - expressed protein (38%)                                     | None                                                                                           |
|  | Bradi3g11175 | 9605941 - 9606524 | 4233  | Expressed protein                                                             | none                                                                           | none                                                                                           |
|  | Bradi3g11180 | 9608962 - 9615936 | 7254  | CYCLIN-T1-3                                                                   | LOC_Os02g24190.1 - cyclin-T1-2, putative, expressed (76.3%)                    | AT4G19600.1 - Cyclin family protein (33.5%)                                                    |
|  | Bradi3g11191 | 9628090 - 9633334 | 26382 | SENTRIN/SUMO-SPECIFIC PROTEASE                                                | LOC_Os06g13890.1 - expressed protein (49.9%)                                   | none                                                                                           |
|  | Bradi3g11197 | 9637041 - 9644509 | 35333 | PHOSPHATIDYLINOSITOL/PHOSPHATIDYLCHOLINE TRANSFER PROTEIN SFHG-RELATED        | LOC_Os02g04020.1 - expressed protein (73.3%)                                   | AT2G21520.1 - Sec14p-like phosphatidylinositol transfer family protein (71.7%)                 |

|  |              |                      |       |                |      |      |
|--|--------------|----------------------|-------|----------------|------|------|
|  | Bradi3g11200 | 9645536 -<br>9650291 | 43828 | No description | None | None |
|--|--------------|----------------------|-------|----------------|------|------|

S19. List of candidate genes for strong energy QTL

| QTL                            | Candidate Gene | Gene Location (bp) | Distance from QTL | Description                                                                                                                  | Rice Protein Homologs                                                            | Arabidopsis Protein Homolog                                            |
|--------------------------------|----------------|--------------------|-------------------|------------------------------------------------------------------------------------------------------------------------------|----------------------------------------------------------------------------------|------------------------------------------------------------------------|
| Energy_QTL1.4<br>(s1_02600962) | Bradi1g03853   | 2583581 - 2584374  | 16588             | Expressed protein                                                                                                            | NA                                                                               | NA                                                                     |
|                                | Bradi1g03856   | 2585071 - 2586838  | 14124             | Differentially upregulated in nitrogen Roots vs. Shoots comparison                                                           | NA                                                                               | NA                                                                     |
|                                | Bradi1g03860   | 2586981 - 2591146  | 9816              | aminopeptidase activity                                                                                                      | LOC_Os03g60460.1 - aminopeptidase, putative, expressed (94.9%)                   | AT5G13520.1 - peptidase M1 family protein (78.1%)                      |
|                                | Bradi1g03867   | 2595174 - 2592606  | 8356              | Coexpressed along with genes transcribed in shoot tissue during night                                                        | LOC_Os12g27790.1 - OsFBX443 - F-box domain containing protein, expressed (14.7%) | NA                                                                     |
|                                | Bradi1g03880   | 2600038 - 2603789  | 0                 | Coexpressed along with genes transcribed in shoot tissue during night                                                        | LOC_Os03g60430.2 - AP2 domain containing protein, expressed (62.6%)              | AT2G28550.3 - related to AP2.7 (42.2%)                                 |
|                                | Bradi1g03890   | 2608441 - 2611283  | 7479              | BRICK1, putative                                                                                                             | NA                                                                               | AT2G22640.1 - BRICK1, putative (76.5%)                                 |
|                                | Bradi1g03900   | 2613615 - 2617812  | 12653             | DNA-dependent ATPase activity                                                                                                | LOC_Os03g60390.1 - PHD finger protein, putative, expressed (78.1%)               | AT5G05610.2 - aifin-like 1 (66.8%)                                     |
|                                | Bradi1g03910   | 2622358 - 2625266  | 24304             | aldo-keto reductase activity, carbonyl reductase (NADPH) activity, steroid dehydrogenase activity, acting on the CH-OH group | LOC_Os03g60380.1 - cinnamoyl CoA reductase, putative, expressed (83.3%)          | AT5G58490.1 - NAD(P)-binding Rossmann-fold superfamily protein (63.4%) |

|                                              |              |                        |       |                                                                                            |                                                                                                               |                                                                               |
|----------------------------------------------|--------------|------------------------|-------|--------------------------------------------------------------------------------------------|---------------------------------------------------------------------------------------------------------------|-------------------------------------------------------------------------------|
|                                              |              |                        |       | of donors, NAD or NADP as acceptor                                                         |                                                                                                               |                                                                               |
| <b>Energy_QTL1.5</b><br><b>(s1_11783844)</b> | Bradi1g14810 | 11754643 -<br>11756133 | 27711 | zinc ion binding                                                                           | LOC_Os03g41110 - C2H2 zinc finger protein, expressed (61%)                                                    | AT1G24625 - zinc finger protein 7 (27%)                                       |
|                                              | Bradi1g14815 | 11756698 -<br>11759061 | 24783 | No annotation                                                                              | none                                                                                                          | none                                                                          |
|                                              | Bradi1g14820 | 11759343 -<br>11761732 | 22112 | CYCCLIN, subfamily CYCA3                                                                   | LOC_Os03g41100 - cyclin, putative, expressed (62%)                                                            | AT1G47230 - CYCCLIN A3;4 (60%)                                                |
|                                              | Bradi1g14830 | 11764332 -<br>11771956 | 11888 | Protein of unknown function (DUF760)                                                       | LOC_Os03g41080.1 - seed maturation protein PM23, putative, expressed (93.9%)                                  | AT2G14910.1 - (1 of 8) PF05542 - Protein of unknown function (DUF760) (60.3%) |
|                                              | Bradi1g14835 | 11777417 -<br>11777940 | 5904  | Expressed, Coexpressed along with genes transcribed in shoot tissue during night           | LOC_Os08g31460.1 - GTPase of unknown function domain containing protein, putative, expressed (83%)            | none                                                                          |
|                                              | Bradi1g14840 | 11782056 -<br>11785989 | 0     | ferrous iron transmembrane transporter activity                                            | LOC_Os12g39180.1 - natural resistance-associated macrophage protein, putative, expressed (80.4%)              | AT1G47240.1 - NRAMP metal ion transporter 2 (72.8%)                           |
|                                              | Bradi1g14845 | 11786471 -<br>11787344 | 2627  | EXTENSIN, PROLINE-RICH PROTEIN, Coexpressed with genes downregulated during drought stress | LOC_Os03g55290.1 - GASR3 - Gibberellin-regulated GASA/GAST/Snakin family protein precursor, expressed (44.4%) | AT1G10588.1 - Gibberellin-regulated family protein (41.7%)                    |

|                                               |              |                        |       |                                                                                                           |                                                                                          |                                                                                            |
|-----------------------------------------------|--------------|------------------------|-------|-----------------------------------------------------------------------------------------------------------|------------------------------------------------------------------------------------------|--------------------------------------------------------------------------------------------|
|                                               | Bradi1g14850 | 11800558 -<br>11803295 | 19451 | Protein of unknown function (DUF620), Coexpressed along with genes transcribed in shoot tissue during day | LOC_Os03g40930.1 - expressed protein (79.9%)                                             | AT3G19540.1 - Protein of unknown function (DUF620) (69.5%)                                 |
|                                               | Bradi1g14855 | 11810840 -<br>11813999 | 26996 | Expressed protein                                                                                         | none                                                                                     | none                                                                                       |
|                                               | Bradi1g14860 | 11819372 -<br>11823066 | 35528 | SF335 - SUBTILISIN-LIKE PROTEASE, Coexpressed with genes in flower specific coexpression subnetwork       | LOC_Os03g55350.1 - OsSub31 - Putative Subtilisin homologue, expressed (72.3%)            | AT5G67360.1 - Subtilase family protein (66.1%)                                             |
| <b>Energy_QT11.10</b><br><b>(s1_53853254)</b> | Bradi1g55216 | 53796314 -<br>53807134 | 46120 | GENERAL TRANSCRIPTION FACTOR 3C POLYPEPTIDE 4                                                             | LOC_Os01g50690.1 - WD domain, G-beta repeat domain containing protein, expressed (78.4%) | AT3G49400.1 - Transducin/WD40 repeat-like superfamily protein (53.4%)                      |
|                                               | Bradi1g55230 | 53824245 -<br>53829688 | 23566 | MEMBRANE RELATED PROTEIN-LIKE                                                                             | LOC_Os07g08760.1 - START domain containing protein, putative, expressed (88.4%)          | AT4G14500.1 - Polyketide cyclase/dehydrase and lipid transport superfamily protein (61.6%) |
|                                               | Bradi1g55240 | 53840201 -<br>53849470 | 3784  | protein kinase family protein, putative, expressed, subfamily RLCK-IXb                                    | LOC_Os03g31000.1 - protein kinase, putative, expressed (71.4%)                           | AT2G45910.1 - U-box domain-containing protein kinase family protein (41.9%)                |
|                                               | Bradi1g55245 | 53853949 -<br>53856846 | 695   | SERINE/THREONINE-PROTEIN KINASE                                                                           | LOC_Os07g38530.2 - STE_PAK_Ste20_Slob_Wnk.4 - STE kinases (62.7%)                        | AT3G04910.1 - with no lysine (K) kinase 1 (54.4%)                                          |
|                                               | Bradi1g55250 | 53857279 -<br>53869489 | 4025  | ATP-dependent DNA helicase activity                                                                       | LOC_Os07g08729.1 - ATP-dependent DNA helicase 2                                          | AT1G16970.1 - KU70 homolog (71.8%)                                                         |

|                                              |              |                     |       |                                      |                                                                                                |                                                                                    |
|----------------------------------------------|--------------|---------------------|-------|--------------------------------------|------------------------------------------------------------------------------------------------|------------------------------------------------------------------------------------|
|                                              |              |                     |       |                                      | subunit 1, putative, expressed (93.8%)                                                         |                                                                                    |
|                                              | Bradi1g55260 | 53870177 - 53871436 | 16923 | histone H1/5                         | LOC_Os07g08710.2 - AT hook-containing DNA-binding protein, putative, expressed (21.4%)         | AT2G30620.2 - winged-helix DNA-binding transcription factor family protein (11.7%) |
|                                              | Bradi1g55272 | 53875377 - 53876293 | 22123 | No description                       | none                                                                                           | none                                                                               |
|                                              | Bradi1g55280 | 53898647 - 53900383 | 45393 | small subunit ribosomal protein S15e | LOC_Os07g08660.1 - 40S ribosomal protein S15, putative, expressed (89.7%)                      | AT5G09510.1 - Ribosomal protein S19 family protein (90.3%)                         |
| <b>Energy_QTL3.3</b><br><b>(s3_00938760)</b> | Bradi3g01377 | 888056 - 890380     | 48380 | MYB-LIKE DNA-BINDING PROTEIN         | LOC_Os02g02370.1 - myb-like DNA-binding domain containing protein, putative, expressed (72.9%) | AT5G52260.1 - myb domain protein 19 (40.9%)                                        |
|                                              | Bradi3g01390 | 893855 - 897506     | 41254 | F-Box                                | LOC_Os07g36870.1 - OsFBX252 - F-box domain containing protein, expressed (48.1%)               | none                                                                               |
|                                              | Bradi3g01398 | 898193 - 900018     | 38742 | F-box-like                           | LOC_Os07g36870.1 - OsFBX252 - F-box domain containing protein, expressed (48.5%)               | none                                                                               |
|                                              | Bradi3g01406 | 902533 - 905344     | 33416 | F-box-like                           | LOC_Os07g36870.1 - OsFBX252 - F-box domain containing protein, expressed (47.3%)               | none                                                                               |
|                                              | Bradi3g01412 | 905987 - 907025     | 31735 | F-box-like                           | LOC_Os07g36870.1 - OsFBX252 - F-box domain containing protein, expressed (54.9%)               | AT3G16210.1 - F-box family protein (10%)                                           |



|  |                     |                        |             |                                            |                                                                                      |                                                                               |
|--|---------------------|------------------------|-------------|--------------------------------------------|--------------------------------------------------------------------------------------|-------------------------------------------------------------------------------|
|  | Bradi3g01419        | 908671 - 911574        | 27186       | F-box-like                                 | LOC_Os07g36870.1 - OsFBX252 - F-box domain containing protein, expressed (32.1%)     | none                                                                          |
|  | Bradi3g01427        | 914646 - 915980        | 22780       | Expressed protein                          | LOC_Os09g17530.1 - OsFBX321 - F-box domain containing protein, expressed (7%)        | none                                                                          |
|  | Bradi3g01440        | 917087 - 918352        | 20408       | nucleoside-triphosphatase activity         | LOC_Os02g02380.1 - suppressor of phythochrome A, putative, expressed (47%)           | AT5G23730.1 - Transducin/WD40 repeat-like superfamily protein (41.3%)         |
|  | Bradi3g01450        | 921226 - 926408        | 12352       | NUCLEIC ACID-BINDING, OB-FOLD-LIKE PROTEIN | LOC_Os02g02390.1 - S1 RNA binding domain containing protein, expressed (71.1%)       | AT1G12800.1 - Nucleic acid-binding, OB-fold-like protein (49.7%)              |
|  | Bradi3g01460        | 925843 - 933040        | 5720        | protein kinase family protein              | LOC_Os03g28980.1 - WD40-like Beta Propeller Repeat family protein, expressed (45.9%) | AT1G21680.1 - DPP6 N-terminal domain-like protein (31.4%)                     |
|  | Bradi3g01470        | 939007 - 941921        | 247         | aminoacylase activity, catalase activity   | LOC_Os02g02400.2 - catalase isozyme A, putative, expressed (86%)                     | AT1G20630.1 - catalase 1 (79%)                                                |
|  | <b>Bradi3g01477</b> | <b>942486 - 946497</b> | <b>3726</b> | <b>HEAT SHOCK PROTEIN 70KDA</b>            | <b>LOC_Os02g02410.1 - DnaK family protein, putative, expressed (87.4%)</b>           | <b>AT5G28540.1 - heat shock protein 70 (Hsp 70) family protein (84.5%)</b>    |
|  | Bradi3g01483        | 948294 - 952294        | 9534        | general transcription factor IIIA (GTF3A)  | LOC_Os02g02424.1 - ZOS2-02 - C2H2 zinc finger protein, expressed (88.4%)             | AT1G72050.2 - transcription factor IIIA (59.3%)                               |
|  | Bradi3g01489        | 952729 - 954585        | 13969       | PPR repeat (PPR)                           | LOC_Os10g26070.1 - pentatricopeptide, putative, expressed (53.6%)                    | AT5G59200.1 - Tetratricopeptide repeat (TPR)-like superfamily protein (52.5%) |
|  | Bradi3g01497        | 955118 - 957532        | 16358       | OPT oligopeptide transporter protein (OPT) | LOC_Os02g02450.1 - transposon protein, putative, unclassified, expressed (81.3%)     | AT3G17650.1 - YELLOW STRIPE like 5 (57%)                                      |

|  |              |                 |       |                                                                |                                                                                                                 |                                                                                     |
|--|--------------|-----------------|-------|----------------------------------------------------------------|-----------------------------------------------------------------------------------------------------------------|-------------------------------------------------------------------------------------|
|  | Bradi3g01510 | 959098 - 961116 | 20338 | Protein of unknown function, DUF594 (DUF594)                   | LOC_Os07g16930.1 - expressed protein (53.5%)                                                                    | AT5G45480.1 - Protein of unknown function (DUF594) (41.2%)                          |
|  | Bradi3g01515 | 961177 - 963366 | 22417 | No description                                                 | none                                                                                                            | none                                                                                |
|  | Bradi3g01520 | 965015 - 967462 | 26255 | OPT oligopeptide transporter protein (OPT)                     | LOC_Os02g02460.1 - transposon protein, putative, unclassified, expressed (82.8%)                                | AT3G17650.1 - YELLOW STRIPE like 5 (68.9%)                                          |
|  | Bradi3g01527 | 968355 - 972729 | 29595 | OXIDOREDUCTASE FEY3-RELATED                                    | LOC_Os02g02470.1 - oxidoreductase, short chain dehydrogenase/reductase family domain containing protein (76.9%) | AT4G27760.1 - NAD(P)-binding Rossmann-fold superfamily protein (69.5%)              |
|  | Bradi3g01540 | 971365 - 974693 | 32605 | bHLH transcription factor                                      | LOC_Os02g02480.1 - basic helix-loop-helix DND-binding domain containing protein, expressed (75.6%)              | AT1G51070.2 - basic helix-loop-helix (bHLH) DNA-binding superfamily protein (49.2%) |
|  | Bradi3g01550 | 974981 - 978786 | 36221 | PROTEIN LOW PSII ACCUMULATION 3, CHLOROPLASTIC                 | LOC_Os02g02520.1 - expressed protein (75.7%)                                                                    | AT1G73060.1 - Low PSII Accumulation 3 (65.9%)                                       |
|  | Bradi3g01560 | 979803 - 980696 | 41043 | DNA-directed RNA polymerase activity                           | LOC_Os02g02510.1 - DNA-directed RNA polymerase II subunit RPB4, putative, expressed (92.9%)                     | AT5G09920.1 - RNA polymerase II, Rpb4, core protein (86.5%)                         |
|  | Bradi3g01570 | 980681 - 984906 | 41921 | galacturonate binding                                          | LOC_Os02g02500.1 - remorin family protein, putative, expressed (84.6%)                                          | AT2G02170.2 - Remorin family protein (53.5%)                                        |
|  | Bradi3g01577 | 985013 - 989900 | 46253 | Protein kinase domain (Pkinase) // Leucine rich repeat (LRR_8) | LOC_Os02g02490.1 - phyto sulfokine receptor precursor, putative, expressed (66.5%)                              | AT2G02220.1 - phyto sulfokine receptor 1 (53.9%)                                    |

|                                        |              |                   |       |                                                                        |                                                                                      |                                                                        |
|----------------------------------------|--------------|-------------------|-------|------------------------------------------------------------------------|--------------------------------------------------------------------------------------|------------------------------------------------------------------------|
| <b>Energy_QTL3.6<br/>(s3_07106643)</b> | Bradi3g08946 | 7058804 - 7059487 | 47156 | No annotation                                                          | none                                                                                 | none                                                                   |
|                                        | Bradi3g08960 | 7075456 - 7079656 | 26987 | 1-phosphatidylinositol-4-phosphate 5-kinase activity                   | LOC_Os02g13890.1 - FYVE zinc finger domain containing protein, expressed (82.3%)     | AT1G29800.2 - RING/FYVE/PHD-type zinc finger family protein (61.5%)    |
|                                        | Bradi3g08961 | 7080630 - 7081434 | 25209 | No annotation                                                          | none                                                                                 | none                                                                   |
|                                        | Bradi3g08963 | 7080630 - 7081425 | 25218 | No annotation                                                          | none                                                                                 | none                                                                   |
|                                        | Bradi3g08967 | 7083882 - 7087443 | 19200 | BES1/BZR1 HOMOLOG PROTEIN 4                                            | LOC_Os06g35900.1 - BES1/BZR1 homolog protein, putative, expressed (61.1%)            | AT1G78700.1 - BES1/BZR1 homolog 4 (55.3%)                              |
|                                        | Bradi3g08974 | 7091746 - 7092224 | 14419 | No annotation                                                          | none                                                                                 | none                                                                   |
|                                        | Bradi3g08981 | 7094905 - 7095887 | 10756 | No annotation                                                          | none                                                                                 | none                                                                   |
|                                        | Bradi3g08990 | 7097643 - 7106185 | 458   | NHL repeat (NHL)                                                       | LOC_Os02g13950.1 - NHL repeat-containing protein, putative, expressed (88.4%)        | AT3G14860.2 - NHL domain-containing protein (62.1%)                    |
|                                        | Bradi3g09000 | 7110846 - 7113041 | 4203  | U-box, subfamily                                                       | LOC_Os02g13960.1 - spotted leaf 11, putative, expressed (75%)                        | AT1G29340.1 - plant U-box 17 (48.8%)                                   |
|                                        | Bradi3g09005 | 7116111 - 7118594 | 9468  | Protein kinase domain (Pkinase) // D-mannose binding lectin (B_lectin) | LOC_Os02g13965.1 - lectin protein kinase family protein, putative, expressed (83.9%) | AT4G32300.1 - S-domain-2 5 (46.9%)                                     |
|                                        | Bradi3g09010 | 7120985 - 7127846 | 14342 | NAD(P)-BINDING ROSSMANN-FOLD SUPERFAMILY PROTEIN                       | LOC_Os02g13970.1 - Complex I intermediate-associated protein 30 domain containing    | AT4G18810.1 - NAD(P)-binding Rossmann-fold superfamily protein (72.7%) |

|                                    |              |                     |       |                                                      |                                                                                           |                                                                     |
|------------------------------------|--------------|---------------------|-------|------------------------------------------------------|-------------------------------------------------------------------------------------------|---------------------------------------------------------------------|
|                                    |              |                     |       |                                                      | protein, putative, expressed (87.9%)                                                      |                                                                     |
|                                    | Bradi3g09013 | 7128096 - 7129751   | 21453 | No annotation                                        | LOC_Os02g13980.1 - expressed protein (45.6%)                                              | AT4G15140.1 (32.2%)                                                 |
|                                    | Bradi3g09015 | 7131557 - 7134272   | 24914 | No annotation                                        | none                                                                                      | none                                                                |
|                                    | Bradi3g09017 | 7138006 - 7142112   | 31363 | No description                                       | LOC_Os03g58930.1 - expressed protein (74.6%)                                              | AT1G20890.1 (63.5%)                                                 |
|                                    | Bradi3g09020 | 7141024 - 7141755   | 34381 | No annotation                                        | none                                                                                      | none                                                                |
|                                    | Bradi3g09030 | 7142735 - 7145347   | 36092 | large subunit ribosomal protein L11e                 | LOC_Os02g14059.1 - ribosomal protein L5, putative, expressed (97.2%)                      | AT5G45775.2 - Ribosomal L5P family protein (97.2%)                  |
|                                    | Bradi3g09032 | 7149154 - 7149795   | 42511 | No annotation                                        | none                                                                                      | none                                                                |
|                                    | Bradi3g09034 | 7149796 - 7150700   | 43153 | No annotation                                        | none                                                                                      | none                                                                |
|                                    | Bradi3g09037 | 7151497 - 7153629   | 44854 | actin related protein 2/3 complex, subunit 3 (ARPC3) | LOC_Os02g14000.1 - actin-related protein 2/3 complex subunit 3, putative, expressed (96%) | AT1G60430.2 - actin-related protein C3 (83.3%)                      |
| <b>Energy_QTL3.8 (s3_16587273)</b> | Bradi3g18077 | 16562829 - 16581852 | 5421  | RING/FYVE/PHD ZINC FINGER DOMAIN-CONTAINING PROTEIN  | LOC_Os08g12680.1 - zinc finger domain, LSD1 subclass family protein, expressed (84.1%)    | AT1G79350.1 - RING/FYVE/PHD zinc finger superfamily protein (80.9%) |
|                                    | Bradi3g18090 | 16582021 - 16585513 | 1760  | protein serine/threonine phosphatase activity        | LOC_Os04g52000.1 - protein phosphatase 2C, putative, expressed (84.9%)                    | AT4G28400.1 - Protein phosphatase 2C family protein (67.6%)         |

|  |              |                        |       |                                                                                                      |                                                                                                                                 |                                                                             |
|--|--------------|------------------------|-------|------------------------------------------------------------------------------------------------------|---------------------------------------------------------------------------------------------------------------------------------|-----------------------------------------------------------------------------|
|  | Bradi3g18100 | 16586176 -<br>16587906 | 633   | Expressed protein                                                                                    | LOC_Os03g21600.1 -<br>expressed protein (47.4%)                                                                                 | none                                                                        |
|  | Bradi3g18120 | 16588308 -<br>16594496 | 1035  | No description                                                                                       | LOC_Os01g20110.1 -<br>expressed protein (72.4%)                                                                                 | AT1G36320.1 (52.2%)                                                         |
|  | Bradi3g18130 | 16594488 -<br>16597664 | 7215  | WAK receptor-like protein<br>kinase, expressed,<br>subfamily WAKL-OS                                 | LOC_Os11g35120.1 -<br>OsWAK116 - OsWAK receptor-<br>like cytoplasmic kinase<br>OsWAK-RLCK, expressed<br>(72.5%)                 | AT1G21230.1 - wall associated<br>kinase 5 (57.4%)                           |
|  | Bradi3g18135 | 16597670 -<br>16598858 | 10397 | Expressed protein                                                                                    | none                                                                                                                            | none                                                                        |
|  | Bradi3g18140 | 16598165 -<br>16606217 | 10892 | beta-amyrin synthase<br>activity, alpha-amyrin<br>synthase activity, lanosterol<br>synthase activity | LOC_Os02g04710.1 -<br>cycloartenol synthase,<br>putative, expressed (73.3%)                                                     | AT2G07050.1 - cycloartenol<br>synthase 1 (71.6%)                            |
|  | Bradi3g18150 | 16621900 -<br>16630426 | 34627 | protein kinase family<br>protein, putative,<br>expressed, subfamily Raf                              | LOC_Os08g12750.1 -<br>serine/threonine-protein<br>kinase HT1, putative,<br>expressed (89%)                                      | AT2G24360.1 - Protein kinase<br>superfamily protein (80.1%)                 |
|  | Bradi3g18160 | 16630479 -<br>16634862 | 42206 | FAD binding                                                                                          | LOC_Os08g02230.1 - FAD-<br>binding and arabino-lactone<br>oxidase domains containing<br>protein, putative, expressed<br>(73.9%) | AT2G46750.1 - D-arabinono-<br>1,4-lactone oxidase family<br>protein (64.2%) |
|  | Bradi3g18170 | 16636799 -<br>16638547 | 49526 | FAD binding                                                                                          | LOC_Os04g29210.1 - FAD-<br>binding and arabino-lactone<br>oxidase domains containing<br>protein, putative, expressed<br>(71.0%) | AT2G46760.1 - D-arabinono-<br>1,4-lactone oxidase family<br>protein (63.5%) |

## S20. Protocol for measuring phenotypic parameters using a PAM

```
TS=40ms
; Quenching protocol with Actinic1 & Actinic2 8mins + dark 3 mins
; Protocol: Quenching-without-FR1-Lucam.p modified by Keng
;version September, 2015
;high-resolution CCD
;
include default.inc ;Includes standard options, do not remove it !
include light.inc ;Includes standard options, do not remove it !
Shutter=3
Sensitivity=50
Act1=100
Act2=100
Super=100

;-----
;-----
;*** Fo Measurement
*****
*****
;-----
;-----
F0duration = 5s
F0period = 1s
<0,F0period..F0duration>=>mfmsub
;
;Fo definition
<0s>=>checkPoint,"startFo"
<F0duration - F0period>=>checkPoint,"endFo"
;
;-----
;-----
;*** Saturating Pulse & Fm Measurement
*****
*****
;-----
;-----
PulseDuration=800ms;####
a1=F0duration + 2*mfmsub_length;####
;
<a1>=>SatPulse(PulseDuration)
<a1>=>act1(PulseDuration)
<a1>=>act2(PulseDuration)
;
<a1>=>mpulse
;
;Fm definition
<a1 + mfmsub_length>=>checkPoint,"startFm"
<a1 + PulseDuration - mfmsub_length>=>checkPoint,"endFm"
;
;Visual frame definition ## Image
shown in pre-processing window
<a1 + PulseDuration/2 + TS>=>checkPoint,"timeVisual"
;
;-----
;-----
;***** Dark Relaxation Measurement
*****
```

```

;-----
;-----
DarkRelaxation1=17s;####
b1= a1 + PulseDuration + 2*mfmsub_length;####
b2=2s;####
<b1, b1 + 200ms .. b1 + b2>=>mfmsub
<b1 + b2 + 200ms, b1 + 2*b2 .. b1+DarkRelaxation1>=>mfmsub
;
;-----
;-----
;***** Kautsky Effect Measurement
*****
;-----
;-----
;
;***** Actinic light Exposure *****
ALPeriod=450s;####
c1= a1 + PulseDuration + DarkRelaxation1 + mfmsub_length;####
<c1>=>act1(ALPeriod)
<c1>=>act2(ALPeriod)
;
;*****Fast Kautsky kinetics*****
c2=3s;####
;
<c1 + TS, c1 + TS + mfmsub_length.. c1+c2>=>mfmsub;
;
;*****Slow Kautsky kinetics*****
c3=4s;####
period of slow measurement
;
<c1 + c2 + c3/10, c1 + c2+ c3/5, c1 + c2 + c3/2>=>mfmsub
;
<c1 + c2 + c3, c1 + c2 + c3 +12s .. c1 + ALPeriod>=>mfmsub;
;
;Fp definition
<c1>=>checkPoint,"startFp"
<c1 + c2 + c3>=>checkPoint,"endFp"
;
;-----
;-----
;***** Saturating Pulses - Fm' Quenching Analysis
*****
;-----
;-----
;
;***** Saturating Pulses - Fm_L1 *****
f1=c1+<18s>;####
f11=f1#<mfmsub_length,2*mfmsub_length ..PulseDuration - mfmsub_length>;####
f11=>mfmsub
f1 + mfmsub_length=>checkPoint,"startFt_L1"
f1 + PulseDuration - mfmsub_length=>checkPoint,"endFt_L1"
;
f2=f1 + PulseDuration;####
f2=>SatPulse(PulseDuration);
f2=>mpulse
f2+PulseDuration/2=>checkPoint,"startFm_L1"
f2 + PulseDuration - mfmsub_length=>checkPoint,"endFm_L1"
;

```

```

;***** Saturating Pulses - Fm_L2 *****
f3=c1+<38s>;####
f31=f3#<mfmsub_length,2*mfmsub_length ..PulseDuration - mfmsub_length>;####
f31=>mfmsub
f3 + mfmsub_length=>checkPoint,"startFt_L2"
f3 + PulseDuration - mfmsub_length=>checkPoint,"endFt_L2"
;
f4=f3 + PulseDuration;####
f4=>SatPulse(PulseDuration);
f4=>mpulse
f4 + PulseDuration/2=>checkPoint,"startFm_L2"
f4 + PulseDuration - mfmsub_length=>checkPoint,"endFm_L2"
;
;***** Saturating Pulses - Fm_L3 *****
f5=c1+<58s>;####
f51=f5#<mfmsub_length,2*mfmsub_length ..PulseDuration - mfmsub_length>;####
f51=>mfmsub
f5 + mfmsub_length=>checkPoint,"startFt_L3"
f5 + PulseDuration - mfmsub_length=>checkPoint,"endFt_L3"
;
f6=f5 + PulseDuration;####
f6=>SatPulse(PulseDuration);
f6=>mpulse
f6 + PulseDuration/2=>checkPoint,"startFm_L3"
f6 + PulseDuration - mfmsub_length=>checkPoint,"endFm_L3"
;
;***** Saturating Pulses - Fm_L4 *****
f7=c1+<78s>;####
f71=f7#<mfmsub_length,2*mfmsub_length ..PulseDuration - mfmsub_length>;####
f71=>mfmsub
f7 + mfmsub_length=>checkPoint,"startFt_L4"
f7 + PulseDuration - mfmsub_length=>checkPoint,"endFt_L4"
;
f8=f7 + PulseDuration;####
f8=>SatPulse(PulseDuration);
f8=>mpulse
f8 + PulseDuration/2=>checkPoint,"startFm_L4"
f8 + PulseDuration - mfmsub_length=>checkPoint,"endFm_L4"
;
;***** Saturating Pulses - Fm_L5 *****
f9=c1+<98s>;####
f91=f9#<mfmsub_length,2*mfmsub_length ..PulseDuration - mfmsub_length>;####
f91=>mfmsub
f9 + mfmsub_length=>checkPoint,"startFt_L5"
f9 + PulseDuration - mfmsub_length=>checkPoint,"endFt_L5"
;
f10=f9 + PulseDuration;####
f10=>SatPulse(PulseDuration);
f10=>mpulse
f10 + PulseDuration/2=>checkPoint,"startFm_L5"
f10 + PulseDuration - mfmsub_length=>checkPoint,"endFm_L5"
;
;***** Saturating Pulses - Fm_L6 *****
f11=c1+<118s>;####
f111=f11#<mfmsub_length,2*mfmsub_length ..PulseDuration - mfmsub_length>;####
f111=>mfmsub
f11 + mfmsub_length=>checkPoint,"startFt_L6"
f11 + PulseDuration - mfmsub_length=>checkPoint,"endFt_L6"

```



```

;
f12=f11 + PulseDuration;####
f12=>SatPulse(PulseDuration);
f12=>mpulse
f12 + PulseDuration/2=>checkPoint,"startFm_L6"
f12 + PulseDuration - mfmsub_length=>checkPoint,"endFm_L6"
;
;***** Saturating Pulses - Fm_L7 *****
f13=c1+<148s>;####
f131=f13#<mfmsub_length,2*mfmsub_length ..PulseDuration - mfmsub_length>;####
f131=>mfmsub
f13 + mfmsub_length=>checkPoint,"startFt_L7"
f13 + PulseDuration - mfmsub_length=>checkPoint,"endFt_L7"
;
f14=f13 + PulseDuration;####
f14=>SatPulse(PulseDuration);
f14=>mpulse
f14 + PulseDuration/2=>checkPoint,"startFm_L7"
f14 + PulseDuration - mfmsub_length=>checkPoint,"endFm_L7"
;
;***** Saturating Pulses - Fm_L8 *****
f15=c1+<178s>;####
f151=f15#<mfmsub_length,2*mfmsub_length ..PulseDuration - mfmsub_length>;####
f151=>mfmsub
f15 + mfmsub_length=>checkPoint,"startFt_L8"
f15 + PulseDuration - mfmsub_length=>checkPoint,"endFt_L8"
;
f16=f15 + PulseDuration;####
f16=>SatPulse(PulseDuration);
f16=>mpulse
f16 + PulseDuration/2=>checkPoint,"startFm_L8"
f16 + PulseDuration - mfmsub_length=>checkPoint,"endFm_L8"
;
;***** Saturating Pulses - Fm_L9 *****
f17=c1+<238s>;####
f171=f17#<mfmsub_length,2*mfmsub_length ..PulseDuration - mfmsub_length>;####
f171=>mfmsub
f17 + mfmsub_length=>checkPoint,"startFt_L9"
f17 + PulseDuration - mfmsub_length=>checkPoint,"endFt_L9"
;
f18=f17 + PulseDuration;####
f18=>SatPulse(PulseDuration);
f18=>mpulse
f18 + PulseDuration/2=>checkPoint,"startFm_L9"
f18 + PulseDuration - mfmsub_length=>checkPoint,"endFm_L9"
;
;***** Saturating Pulses - Fm_L10 *****
f19=c1+<298s>;####
f191=f19#<mfmsub_length,2*mfmsub_length ..PulseDuration - mfmsub_length>;####
f191=>mfmsub
f19 + mfmsub_length=>checkPoint,"startFt_L10"
f19 + PulseDuration - mfmsub_length=>checkPoint,"endFt_L10"
;
f20=f19 + PulseDuration;####
f20=>SatPulse(PulseDuration);
f20=>mpulse
f20 + PulseDuration/2=>checkPoint,"startFm_L10"
f20 + PulseDuration - mfmsub_length=>checkPoint,"endFm_L10"

```

```

;
;***** Saturating Pulses - Fm_L11 *****
f21=c1+<358s>;####
f211=f21#<mfmsub_length,2*mfmsub_length ..PulseDuration - mfmsub_length>;####
f211=>mfmsub
f21 + mfmsub_length=>checkPoint,"startFt_L11"
f21 + PulseDuration - mfmsub_length=>checkPoint,"endFt_L11"
;
f22=f21 + PulseDuration;####
f22=>SatPulse(PulseDuration);
f22=>mpulse
f22 + PulseDuration/2=>checkPoint,"startFm_L11"
f22 + PulseDuration - mfmsub_length=>checkPoint,"endFm_L11"
;
;***** Saturating Pulses - Fm_L12 *****
f23=c1+<448s>;####
f231=f23#<mfmsub_length,2*mfmsub_length ..PulseDuration - mfmsub_length>;####
f231=>mfmsub
f23 + mfmsub_length=>checkPoint,"startFt_Lss"
f23 + PulseDuration - mfmsub_length=>checkPoint,"endFt_Lss"
;
f24=f23 + PulseDuration;####
f24=>SatPulse(PulseDuration);
f24=>mpulse
f24 + PulseDuration/2=>checkPoint,"startFm_Lss"
f24 + PulseDuration - mfmsub_length=>checkPoint,"endFm_Lss"
;
;-----
-----
;*** Dark relaxation after actinic light period
*****
;-----
-----
DarkRelaxation2=180s;####
h=c1 + ALPeriod +mfmsub_length;####
;
;***** Relaxation measurement*****
;
<h, h+DarkRelaxation2/10..h+DarkRelaxation2>=>mfmsub
;
;***** Saturating Pulses - Fm_D1 *****
g1=h + <28s>;####
g11=g1#<mfmsub_length,2*mfmsub_length ..PulseDuration - mfmsub_length>;####
g11=>mfmsub
g1 + mfmsub_length=>checkPoint,"startFt_D1"
g1 + PulseDuration - mfmsub_length=>checkPoint,"endFt_D1"
;
g2=g1 + PulseDuration;####
g2=>SatPulse(PulseDuration)
g2=>act1(PulseDuration)
g2=>act2(PulseDuration)
g2=>mpulse
g2 + PulseDuration/2=>checkPoint,"startFm_D1"
g2 + PulseDuration - mfmsub_length=>checkPoint,"endFm_D1"
;
;***** Saturating Pulses - Fm_D2 *****
g3=h + <58s>;####
g31=g3#<mfmsub_length,2*mfmsub_length ..PulseDuration - mfmsub_length>;####

```

```

g31=>mfmsub
g3 + mfmsub_length=>checkPoint,"startFt_D2"
g3 + PulseDuration - mfmsub_length=>checkPoint, "endFt_D2"
;
g4=g3 + PulseDuration;####
g4=>SatPulse(PulseDuration)
g4=>act1(PulseDuration)
g4=>act2(PulseDuration)
g4=>mpulse
g4 + PulseDuration/2=>checkPoint,"startFm_D2"
g4 + PulseDuration - mfmsub_length=>checkPoint,"endFm_D2"
;
;***** Saturating Pulses - Fm_D3 *****
g5=h+<118s>;####
g51=g5#<mfmsub_length,2*mfmsub_length ..PulseDuration - mfmsub_length>;####
g51=>mfmsub
g5 + mfmsub_length=>checkPoint,"startFt_D3"
g5 + PulseDuration - mfmsub_length=>checkPoint,"endFt_D3"
;
g6=g5 + PulseDuration;####
g6=>SatPulse(PulseDuration)
g6=>act1(PulseDuration)
g6=>act2(PulseDuration)
g6=>mpulse
g6 + PulseDuration/2=>checkPoint,"startFm_D3"
g6 + PulseDuration - mfmsub_length=>checkPoint,"endFm_D3"
;
;***** Saturating Pulses - Fm_D4 *****
g7=h+<178s>;####
g71=g5#<mfmsub_length,2*mfmsub_length ..PulseDuration - mfmsub_length>;####
g71=>mfmsub
g7 + mfmsub_length=>checkPoint,"startFt_D4"
g7 + PulseDuration - mfmsub_length=>checkPoint,"endFt_D4"
;
g8=g7 + PulseDuration;####
g8=>SatPulse(PulseDuration)
g8=>act1(PulseDuration)
g8=>act2(PulseDuration)
g8=>mpulse
g8 + PulseDuration/2=>checkPoint,"startFm_D4"
g8 + PulseDuration - mfmsub_length=>checkPoint,"endFm_D4"
;
;END *****

```
